# Supplementary material for: Changes in C57BL6 Mouse Hippocampal Transcriptome Induced by Hypergravity Mimic Acute Corticosterone-Induced Stress
Source: Front Mol Neurosci. 2016 Dec 26;9:153. doi: 10.3389/fnmol.2016.00153 (PMC5183579; doi:10.3389/fnmol.2016.00153)
Supplement: Supplementary file 1 [file Table1.XLSX]

## Sheet: affected by 3G
Category	Term	Count	%	PValue	Genes	List Total	Pop Hits	Pop Total	Fold Enrichment	Bonferroni	Benjamini	FDR
SP_PIR_KEYWORDS	signal	29	3.756476683937824	5.255484294653111E-6	A2M, ENPP2, 1500015O10RIK, PDIA4, DCN, CDH3, MFRP, TTR, C1QTNF5, ACE, FOLR1, SPINT2, SOSTDC1, TGFBI, HSPA5, LBP, COL8A1, COL8A2, KL, IGF2, FZD4, LCN2, SFRP1, F5, SDF2L1, SULF1, IGFBP2, PLA2G5, WFDC2, PON3	73	2970	17854	2.3881094045477607	8.457773234233912E-4	4.229781169553526E-4	0.006352502253881287
UP_SEQ_FEATURE	signal peptide	29	3.756476683937824	2.989762563968043E-5	A2M, ENPP2, 1500015O10RIK, PDIA4, DCN, CDH3, MFRP, TTR, C1QTNF5, ACE, FOLR1, SPINT2, SOSTDC1, TGFBI, HSPA5, LBP, COL8A1, COL8A2, KL, IGF2, FZD4, LCN2, SFRP1, F5, SDF2L1, SULF1, IGFBP2, PLA2G5, WFDC2, PON3	72	2963	16021	2.177827464656692	0.009817851063129823	0.009817851063129823	0.04052491192122476
SP_PIR_KEYWORDS	glycoprotein	27	3.4974093264248705	0.0012119749746847463	A2M, ENPP2, DCN, PDIA4, AQP1, ABCA4, CDH3, MFRP, TTR, ACE, C1QTNF5, FOLR1, SPINT2, SOSTDC1, GPR101, SLCO1C1, KCNE2, LBP, KL, FZD4, LCN2, KRT18, F5, SFRP1, SULF1, SLC37A2, IGFBP2, PON3	73	3600	17854	1.8343150684931504	0.17736799075615106	0.06300947034510396	1.4551992007812986
UP_SEQ_FEATURE	glycosylation site:N-linked (GlcNAc...)	25	3.2383419689119166	0.011136665250056806	A2M, ENPP2, DCN, PDIA4, CDH3, ABCA4, AQP1, MFRP, TTR, ACE, C1QTNF5, SPINT2, FOLR1, SOSTDC1, KCNE2, GPR101, SLCO1C1, LBP, KL, FZD4, LCN2, F5, SFRP1, SLC37A2, SULF1, PON3	72	3444	16021	1.6152285778810167	0.9751703537072162	0.5224772064148795	14.086389721394244
SP_PIR_KEYWORDS	Secreted	21	2.7202072538860103	5.056406245866035E-7	A2M, ENPP2, KL, 1500015O10RIK, IGF2, DCN, MFRP, LCN2, TTR, ACE, C1QTNF5, F5, SFRP1, SOSTDC1, TGFBI, LBP, IGFBP2, COL8A1, COL8A2, WFDC2, PLA2G5, PON3	73	1420	17854	3.6169592899864944	8.140484758667466E-5	8.140484758667466E-5	6.112030043747829E-4
SP_PIR_KEYWORDS	disulfide bond	21	2.7202072538860103	0.0014077208915261943	A2M, ENPP2, IGF2, PDIA4, DCN, ABCA4, FZD4, MFRP, LCN2, ACE, C1QTNF5, F5, SFRP1, SPINT2, FOLR1, SOSTDC1, TGFBI, GPR101, IGFBP2, WFDC2, PLA2G5, PON3	73	2469	17854	2.0802277001947433	0.20292200040934483	0.05512315678653246	1.6883978501284203
UP_SEQ_FEATURE	disulfide bond	20	2.5906735751295336	0.0064442001263002955	A2M, ENPP2, IGF2, DCN, PDIA4, ABCA4, FZD4, MFRP, LCN2, ACE, C1QTNF5, F5, SFRP1, SPINT2, SOSTDC1, TGFBI, GPR101, IGFBP2, WFDC2, PLA2G5, PON3	72	2379	16021	1.870650600158797	0.8815740839741982	0.5089237649523008	8.391616814194503
SP_PIR_KEYWORDS	transport	12	1.5544041450777202	0.04926432068896288	TTR, RBP1, CLIC6, SLC37A2, KCNE2, TRPV4, SLCO1C1, LBP, AQP1, ABCA4, STEAP1, KCNJ13	73	1571	17854	1.8681757540350354	0.9997064875098236	0.46509215389965264	45.70089108752883
SP_PIR_KEYWORDS	developmental protein	8	1.0362694300518136	0.045371549083958435	ARC, MSX1, SFRP1, OTX2, SMAD5, HSPA1B, SIK1, FZD4	73	814	17854	2.403688869442294	0.9994333248831407	0.46365465966923014	42.95161438048217
SP_PIR_KEYWORDS	calcium	7	0.9067357512953367	0.07416850200305992	CAPN11, F5, SULF1, TRPV4, CDH3, PON3, PLA2G5	73	731	17854	2.3420347431741093	0.9999959107443147	0.49806566626453785	60.604439574004346
SP_PIR_KEYWORDS	ion transport	6	0.7772020725388601	0.06799518737558269	CLIC6, KCNE2, TRPV4, SLCO1C1, STEAP1, KCNJ13	73	543	17854	2.7024899719972755	0.999988078718438	0.5303710476880432	57.3091379725065
SP_PIR_KEYWORDS	DNA binding	5	0.6476683937823834	0.020371206736549616	EGR1, EGR2, MSX1, OTX2, FOSB	73	258	17854	4.739832218328554	0.9636161904083023	0.3771041278263707	22.025189281483836
SP_PIR_KEYWORDS	collagen	4	0.5181347150259068	0.004743230808358847	C1QTNF5, COL9A3, COL8A1, COL8A2, MFRP	73	84	17854	11.64644487932159	0.5348879877289638	0.1419521425704494	5.585101252056058
SP_PIR_KEYWORDS	extracellular matrix	4	0.5181347150259068	0.054837181399817976	TGFBI, DCN, COL8A1, COL8A2	73	213	17854	4.592964177760628	0.9998860885896456	0.4772112532450383	49.42559875833942
SP_PIR_KEYWORDS	cleavage on pair of basic residues	4	0.5181347150259068	0.07144437343497141	ENPP2, 1500015O10RIK, IGF2, CDH3	73	238	17854	4.11050995740762	0.9999934373978527	0.5256845680215765	59.18019634182753
KEGG_PATHWAY	mmu05020:Prion diseases	3	0.38860103626943004	0.006410699923661847	EGR1, HSPA1B, HSPA5	21	35	5738	23.420408163265304	0.2218392304622291	0.2218392304622291	5.680876593237416
KEGG_PATHWAY	mmu04670:Leukocyte transendothelial migration	3	0.38860103626943004	0.06356125503344523	EZR, CLDN1, CLDN2	21	119	5738	6.888355342136854	0.9227860810277734	0.7221260736013064	44.965504201001615
KEGG_PATHWAY	mmu04514:Cell adhesion molecules (CAMs)	3	0.38860103626943004	0.09925962565277086	CLDN1, CLDN2, CDH3	21	154	5738	5.3228200371057515	0.9830415731829059	0.7430816127305182	61.351599873784465
SP_PIR_KEYWORDS	stress response	3	0.38860103626943004	0.014196950963361333	HSPA1B, HSPA5, DNAJB1	73	45	17854	16.305022831050227	0.8999504157318841	0.31865164028960036	15.872671598503151
SP_PIR_KEYWORDS	Tight junction	3	0.38860103626943004	0.025182027613004452	CGNL1, CLDN1, CLDN2	73	61	17854	12.028295531102627	0.9835302149300477	0.40146990612442757	26.52990606579926
SP_PIR_KEYWORDS	angiogenesis	3	0.38860103626943004	0.025954579617205466	SMAD5, COL8A1, COL8A2	73	62	17854	11.83429076447194	0.9855038519713439	0.3752665858261053	27.230638667847384
SP_PIR_KEYWORDS	Serine protease inhibitor	3	0.38860103626943004	0.04330324962449285	A2M, SPINT2, WFDC2	73	82	17854	8.947878382893418	0.9991970988029598	0.4768747944953742	41.43948044221229
SP_PIR_KEYWORDS	protease inhibitor	3	0.38860103626943004	0.07165160197922957	A2M, SPINT2, WFDC2	73	109	17854	6.7314314440115615	0.9999936690371715	0.5054569490832568	59.29017794456279
SP_PIR_KEYWORDS	wnt signaling pathway	3	0.38860103626943004	0.0821394354772173	SFRP1, SOSTDC1, FZD4	73	118	17854	6.218017181332714	0.9999989836332035	0.5162938562042663	64.51417183551173
SP_PIR_KEYWORDS	duplication	3	0.38860103626943004	0.08453134270227251	F5, PDIA4, CDH3	73	120	17854	6.114383561643835	0.9999993322709246	0.508832056593658	65.6159716715978
UP_SEQ_FEATURE	domain:FZ	3	0.38860103626943004	0.004223892704102321	C1QTNF5, SFRP1, FZD4, MFRP	72	22	16021	30.342803030303028	0.7526217451867931	0.5026286550139756	5.576955655059413
UP_SEQ_FEATURE	domain:C1q	3	0.38860103626943004	0.006794423926005017	C1QTNF5, COL8A1, COL8A2, MFRP	72	28	16021	23.840773809523807	0.894580923446664	0.4301903474508999	8.828428844321333
UP_SEQ_FEATURE	short sequence motif:Prevents secretion from ER	3	0.38860103626943004	0.0281644916763571	SDF2L1, HSPA5, PDIA4	72	59	16021	11.314265536723163	0.9999195341154362	0.6922475820858607	32.11187597605941
UP_SEQ_FEATURE	metal ion-binding site:Calcium	3	0.38860103626943004	0.029953761398786742	F5, SULF1, PLA2G5	72	61	16021	10.94330601092896	0.9999561969972383	0.672114166086772	33.78693493491773
UP_SEQ_FEATURE	short sequence motif:Cell attachment site	3	0.38860103626943004	0.04472090725183941	ENPP2, TGFBI, IGFBP2	72	76	16021	8.78344298245614	0.9999997226743442	0.74654072618714	46.219596135313665
BIOCARTA	m_fosbPathway:FOSB gene expression and drug abuse	2	0.2590673575129534	0.04617168451884466	PPP1R1B, FOSB	12	5	1171	39.03333333333333	0.6784229405863795	0.6784229405863795	31.559553138456042
SP_PIR_KEYWORDS	vitamin a	2	0.2590673575129534	0.031816125027756076	TTR, RBP1	73	8	17854	61.14383561643836	0.9945145396395526	0.4058155142667025	32.3508679071641
SP_PIR_KEYWORDS	plasma	2	0.2590673575129534	0.09248334595257524	TTR, F5	73	24	17854	20.381278538812783	0.9999998360953847	0.524790302718539	69.05732598632986
UP_SEQ_FEATURE	region of interest:Triple-helical region (COL1)	2	0.2590673575129534	0.013237040428941601	COL8A1, COL8A2	72	3	16021	148.34259259259258	0.9876906015691912	0.519485897509108	16.527607877705975
UP_SEQ_FEATURE	region of interest:B	2	0.2590673575129534	0.026301297249419854	F5, IGF2	72	6	16021	74.17129629629629	0.9998486037346473	0.715355913322322	30.32596035899201
UP_SEQ_FEATURE	region of interest:Nonhelical region (NC2)	2	0.2590673575129534	0.026301297249419854	COL8A1, COL8A2	72	6	16021	74.17129629629629	0.9998486037346473	0.715355913322322	30.32596035899201
UP_SEQ_FEATURE	region of interest:Nonhelical region (NC1)	2	0.2590673575129534	0.030618038297453052	COL8A1, COL8A2	72	7	16021	63.57539682539682	0.9999650595695679	0.6416290276239569	34.39900477215233

## Sheet: affected by acute stress
Category	Term	Count	%	PValue	Genes	List Total	Pop Hits	Pop Total	Fold Enrichment	Bonferroni	Benjamini	FDR
SP_PIR_KEYWORDS	signal	35	3.41130604288499	1.3514006257918272E-5	ALPL, WFIKKN2, FMOD, A2M, ENPP2, 1500015O10RIK, CDH3, TTR, ACE, FOLR1, SPINT2, SOSTDC1, TGFBI, LBP, COL8A1, SLC39A4, COL8A2, RAMP3, COCH, KL, PMCH, IGF2, FZD4, PRELP, LCN2, PTGDS, F5, SULF1, BMP7, IGFBP2, SLITRK6, PLA2G5, GLP1R, PON3, WFDC2	100	2970	17854	2.104006734006734	0.0026991701864884643	0.0013504970143370931	0.016937087988266875
UP_SEQ_FEATURE	signal peptide	35	3.41130604288499	6.215688896655384E-5	ALPL, WFIKKN2, FMOD, A2M, ENPP2, 1500015O10RIK, CDH3, TTR, ACE, FOLR1, SPINT2, SOSTDC1, TGFBI, LBP, COL8A1, SLC39A4, COL8A2, RAMP3, COCH, KL, PMCH, IGF2, FZD4, PRELP, LCN2, PTGDS, F5, SULF1, BMP7, IGFBP2, SLITRK6, PLA2G5, GLP1R, PON3, WFDC2	97	2963	16021	1.9509865662761692	0.022797051698216775	0.022797051698216775	0.08571270793478192
SP_PIR_KEYWORDS	glycoprotein	33	3.216374269005848	0.0029213675041309117	ALPL, WFIKKN2, FMOD, A2M, ENPP2, AQP1, ABCA4, CDH3, TTR, ACE, FOLR1, SPINT2, SOSTDC1, KCNE2, LBP, SLC39A4, RAMP3, COCH, KL, FZD4, PRELP, LCN2, SLC17A6, PTGDS, F5, SULF1, SLC37A2, ADRA1B, BMP7, IGFBP2, HTR2C, GLP1R, PON3	100	3600	17854	1.6366166666666666	0.4429657804169812	0.13608608568899383	3.6005709432477717
UP_SEQ_FEATURE	glycosylation site:N-linked (GlcNAc...)	32	3.1189083820662766	0.009047700449686509	ALPL, WFIKKN2, FMOD, A2M, ENPP2, AQP1, ABCA4, CDH3, TTR, ACE, FOLR1, SPINT2, SOSTDC1, KCNE2, LBP, SLC39A4, RAMP3, COCH, KL, FZD4, PRELP, LCN2, SLC17A6, PTGDS, F5, SULF1, SLC37A2, ADRA1B, BMP7, HTR2C, GLP1R, PON3	97	3444	16021	1.5346336673970569	0.9656781904808759	0.6750199317339964	11.784111189690293
SP_PIR_KEYWORDS	Secreted	27	2.631578947368421	3.643775532657605E-8	WFIKKN2, FMOD, A2M, S100A8, ENPP2, S100A9, 1500015O10RIK, TTR, ACE, SOSTDC1, TGFBI, LBP, COL8A1, COL8A2, COCH, KL, PMCH, IGF2, PRELP, LCN2, PTGDS, F5, BMP7, IGFBP2, WFDC2, PON3, PLA2G5	100	1420	17854	3.394774647887324	7.287524652288546E-6	7.287524652288546E-6	4.567094511465086E-5
SP_PIR_KEYWORDS	disulfide bond	27	2.631578947368421	7.535360596680363E-4	WFIKKN2, FMOD, A2M, ENPP2, ABCA4, ACE, FOLR1, SPINT2, SOSTDC1, TGFBI, RAMP3, COCH, PMCH, IGF2, FZD4, PRELP, LCN2, PTGDS, F5, ADRA1B, BMP7, IGFBP2, HTR2C, WFDC2, PON3, GLP1R, PLA2G5	100	2469	17854	1.952442284325638	0.13994937237312222	0.04901279809893211	0.9403859356692301
UP_SEQ_FEATURE	disulfide bond	26	2.53411306042885	0.0029223414538031545	WFIKKN2, FMOD, A2M, ENPP2, ABCA4, ACE, SPINT2, SOSTDC1, TGFBI, RAMP3, COCH, PMCH, IGF2, FZD4, PRELP, LCN2, PTGDS, F5, ADRA1B, BMP7, IGFBP2, HTR2C, WFDC2, PON3, GLP1R, PLA2G5	97	2379	16021	1.805081403864571	0.6623603097467319	0.41893228427895934	3.9569219166826097
SP_PIR_KEYWORDS	cell membrane	17	1.6569200779727096	0.02608057665654949	ALPL, SGMS2, S100A8, KL, S100A9, CDH3, ACE, DIO3, FOLR1, CLIC6, CLDN1, ADRA1B, CLDN2, PERP, SLC39A4, HTR2C, GLP1R	100	1713	17854	1.7718505545826035	0.9949346967278634	0.4834936304604912	28.196101148390383
SP_PIR_KEYWORDS	transport	16	1.5594541910331383	0.02611134056567786	RAMP3, AQP1, ABCA4, KCNJ13, RIMS3, TTR, SLC17A6, PTGDS, SLC37A2, CLIC6, KCNE2, TRPV4, HBB-B1, LBP, SLC39A4, STEAP1	100	1571	17854	1.8183577339274346	0.994966596652933	0.44454190069757704	28.224524538870487
SP_PIR_KEYWORDS	developmental protein	10	0.9746588693957114	0.03670171793577502	HES5, GADD45G, OTX2, SIX3, ID3, SIK1, ZIC1, BMP7, CIT, FZD4	100	814	17854	2.1933660933660937	0.9994348585596468	0.46377577586156304	37.416728955115374
SP_PIR_KEYWORDS	calcium	9	0.8771929824561403	0.05008960998647673	F5, S100A8, SULF1, S100A9, SYT9, TRPV4, CDH3, PON3, PLA2G5	100	731	17854	2.1981668946648427	0.9999656024434841	0.45368540931326373	47.48601601371566
SP_PIR_KEYWORDS	cell junction	7	0.682261208576998	0.02189944783825369	CGNL1, SLC17A6, CLDN1, SYT9, CLDN2, PERP, RIMS3	100	392	17854	3.188214285714286	0.9880683414874277	0.5219755220494703	24.235252963398146
SP_PIR_KEYWORDS	ion transport	7	0.682261208576998	0.08133156519182125	SLC17A6, CLIC6, KCNE2, TRPV4, SLC39A4, STEAP1, KCNJ13	100	543	17854	2.301620626151013	0.9999999571689344	0.5718578910966219	65.46705461825302
SP_PIR_KEYWORDS	Apoptosis	6	0.5847953216374269	0.03953395608676641	PLEKHF1, SGK1, GADD45G, SULF1, PERP, DDIT4	100	337	17854	3.178753709198813	0.9996863804659971	0.46235879406172287	39.68432431876337
SP_PIR_KEYWORDS	extracellular matrix	5	0.4873294346978557	0.030812018178478482	FMOD, TGFBI, COL8A1, COL8A2, PRELP	100	213	17854	4.191079812206573	0.998087488623245	0.4339261494240104	32.44793938065259
SP_PIR_KEYWORDS	cleavage on pair of basic residues	5	0.4873294346978557	0.04345820477208286	ENPP2, PMCH, 1500015O10RIK, IGF2, CDH3	100	238	17854	3.750840336134454	0.9998617101911149	0.46991910054615127	42.701401757345614
KEGG_PATHWAY	mmu04270:Vascular smooth muscle contraction	4	0.3898635477582846	0.030852304979089796	RAMP3, PLCB4, ADRA1B, PLA2G5	34	120	5738	5.625490196078432	0.873602689074317	0.873602689074317	27.415204678597338
SP_PIR_KEYWORDS	Serine protease inhibitor	4	0.3898635477582846	0.01067423782597699	WFIKKN2, A2M, SPINT2, WFDC2	100	82	17854	8.709268292682928	0.8830867691826207	0.3490123757043121	12.58556009148133
SP_PIR_KEYWORDS	protease inhibitor	4	0.3898635477582846	0.022742357296610123	WFIKKN2, A2M, SPINT2, WFDC2	100	109	17854	6.551926605504587	0.9899581181138168	0.4817431923533265	25.049574370749028
KEGG_PATHWAY	mmu04115:p53 signaling pathway	3	0.29239766081871343	0.05924858671214018	CDKN1A, GADD45G, PERP	34	69	5738	7.337595907928389	0.9822441264913722	0.8667488329933736	46.44540919438178
KEGG_PATHWAY	mmu05215:Prostate cancer	3	0.29239766081871343	0.09395179630321275	CDKN1A, NFKBIA, TCF7L2	34	90	5738	5.625490196078431	0.9985141121102049	0.8858886926422007	63.533168644856744
SP_PIR_KEYWORDS	calcium binding	3	0.29239766081871343	0.02798805444613964	S100A8, S100A9, CDH3	100	47	17854	11.396170212765957	0.9965776813389193	0.4331971248936918	29.93900595230935
SP_PIR_KEYWORDS	Tight junction	3	0.29239766081871343	0.04508323452046341	CGNL1, CLDN1, CLDN2	100	61	17854	8.780655737704917	0.9999015753988176	0.45940306685263277	43.909603549303576
SP_PIR_KEYWORDS	chemotaxis	3	0.29239766081871343	0.04642148222138823	S100A8, ENPP2, S100A9	100	62	17854	8.639032258064516	0.9999256481560491	0.44797882905305997	44.88693323702374
SP_PIR_KEYWORDS	Antimicrobial	3	0.29239766081871343	0.0547490598596854	S100A8, S100A9, LBP	100	68	17854	7.876764705882353	0.9999871345910308	0.46506463437619416	50.62484922062925
SP_PIR_KEYWORDS	collagen	3	0.29239766081871343	0.07920036574518528	COL9A3, COL8A1, COL8A2	100	84	17854	6.376428571428571	0.9999999319187339	0.5804430423237873	64.44938659132185
UP_SEQ_FEATURE	metal ion-binding site:Calcium	3	0.29239766081871343	0.05175842665071763	F5, SULF1, PLA2G5	97	61	16021	8.122866317390569	0.9999999972650712	0.940199257636833	51.96117115666492
UP_SEQ_FEATURE	short sequence motif:PDZ-binding	3	0.29239766081871343	0.0693293334929026	AMOTL1, HTR2C, FZD4	97	72	16021	6.881872852233677	0.9999999999973496	0.9642796509482333	62.886295741851384
UP_SEQ_FEATURE	short sequence motif:Cell attachment site	3	0.29239766081871343	0.07614067418185208	ENPP2, TGFBI, IGFBP2	97	76	16021	6.519669017905589	0.9999999999998264	0.9470364693847277	66.46293242942498
UP_SEQ_FEATURE	repeat:LRR 12	3	0.29239766081871343	0.08138303545772038	FMOD, SLITRK6, PRELP	97	79	16021	6.272086650137022	0.999999999999979	0.9429013384391303	68.99499706782228
UP_SEQ_FEATURE	repeat:LRR 11	3	0.29239766081871343	0.0977393334846913	FMOD, SLITRK6, PRELP	97	88	16021	5.630623242736645	1.0	0.9584074922863898	75.80110991834606
BIOCARTA	m_eponfkbPathway:Erythropoietin mediated neuroprotection through NF-kB	2	0.1949317738791423	0.07293570478569444	CDKN1A, NFKBIA	9	11	1171	23.656565656565657	0.9345431981755274	0.9345431981755274	49.10869531817621
BIOCARTA	m_cd40Pathway:CD40L Signaling Pathway	2	0.1949317738791423	0.08568418347571345	DUSP1, NFKBIA	9	13	1171	20.017094017094017	0.9602383522916971	0.8005967710685133	55.02135151695769
SP_PIR_KEYWORDS	inflammation	2	0.1949317738791423	0.09023541241715634	S100A8, S100A9	100	17	17854	21.00470588235294	0.9999999938933138	0.5936990052358246	69.43545900841968
UP_SEQ_FEATURE	region of interest:Triple-helical region (COL1)	2	0.1949317738791423	0.0178700128227896	COL8A1, COL8A2	97	3	16021	110.10996563573882	0.998756377944049	0.8122101548009593	22.022512685376295
UP_SEQ_FEATURE	region of interest:Nonhelical region (NC2)	2	0.1949317738791423	0.03542395580377575	COL8A1, COL8A2	97	6	16021	55.05498281786941	0.9999984553466704	0.9311718328093731	39.197956154788805
UP_SEQ_FEATURE	region of interest:B	2	0.1949317738791423	0.03542395580377575	F5, IGF2	97	6	16021	55.05498281786941	0.9999984553466704	0.9311718328093731	39.197956154788805
UP_SEQ_FEATURE	region of interest:Nonhelical region (NC1)	2	0.1949317738791423	0.04120599140963243	COL8A1, COL8A2	97	7	16021	47.189985272459495	0.9999998340066962	0.9258663992452498	44.03755927925371
UP_SEQ_FEATURE	domain:BPTI/Kunitz inhibitor 1	2	0.1949317738791423	0.04120599140963243	WFIKKN2, SPINT2	97	7	16021	47.189985272459495	0.9999998340066962	0.9258663992452498	44.03755927925371
UP_SEQ_FEATURE	domain:BPTI/Kunitz inhibitor 2	2	0.1949317738791423	0.04120599140963243	WFIKKN2, SPINT2	97	7	16021	47.189985272459495	0.9999998340066962	0.9258663992452498	44.03755927925371
UP_SEQ_FEATURE	calcium-binding region:1; low affinity	2	0.1949317738791423	0.06960566666696937	S100A8, S100A9	97	12	16021	27.527491408934704	0.999999999997626	0.9489040539324889	63.038027031380665
UP_SEQ_FEATURE	calcium-binding region:2; high affinity	2	0.1949317738791423	0.06960566666696937	S100A8, S100A9	97	12	16021	27.527491408934704	0.999999999997626	0.9489040539324889	63.038027031380665

## Sheet: affected by chronic stress
Category	Term	Count	%	PValue	Genes	List Total	Pop Hits	Pop Total	Fold Enrichment	Bonferroni	Benjamini	FDR
SP_PIR_KEYWORDS	membrane	43	4.569606801275238	0.005087973379061797	ENPP6, TSPAN2, LRRC8C, ATP10A, RPRM, AQP4, PAQR8, CNP, MFSD2A, LPAR1, CLDN11, SDC4, SLC7A5, MOG, CNTNAP5A, EPHB1, MBP, CD9, SERINC5, ACE, SLC16A1, CDH9, TTYH2, ANO3, D10BWG1379E, LAG3, MAG, PLP1, UGT8A, FA2H, BFSP2, MAL, FIBCD1, GJB6, TMEM130, MCAM, PTGDS, STXBP6, TRIM59, CDH19, HSD11B1, KSR1, EMP2	97	5507	17854	1.4371998899245382	0.6538904471351399	0.1406434935967551	6.231922883026075
SP_PIR_KEYWORDS	glycoprotein	37	3.9319872476089266	6.342968428476334E-5	APOOL, ENPP6, FMOD, TSPAN2, RPRM, AQP4, LPAR1, SDC4, MOG, SLC7A5, CNTNAP5A, EPHB1, TTR, CD9, SERINC5, ACE, CDH9, TTYH2, ANO3, SEPP1, COL11A2, LAG3, SPP1, MAG, UGT8A, PRG4, SPARC, TMEM130, MCAM, PRELP, LCN2, VWF, PTGDS, GAA, HSD11B1, EMP2, ADAMTS4	97	3600	17854	1.891746849942726	0.013107136219015048	0.013107136219015048	0.07998346422349867
SP_PIR_KEYWORDS	transmembrane	37	3.9319872476089266	0.05177866133843111	ENPP6, TSPAN2, LRRC8C, ATP10A, RPRM, AQP4, PAQR8, MFSD2A, LPAR1, CLDN11, SDC4, MOG, SLC7A5, CNTNAP5A, EPHB1, CD9, SERINC5, ACE, SLC16A1, CDH9, TTYH2, ANO3, D10BWG1379E, LAG3, MAG, PLP1, UGT8A, FA2H, MAL, FIBCD1, GJB6, TMEM130, MCAM, TRIM59, CDH19, HSD11B1, EMP2	97	5237	17854	1.3004179224353283	0.9999842520989889	0.5461164145893536	48.86369566201334
UP_SEQ_FEATURE	glycosylation site:N-linked (GlcNAc...)	36	3.825717321997875	3.4824357023288455E-4	APOOL, ENPP6, FMOD, TSPAN2, RPRM, AQP4, LPAR1, MOG, SLC7A5, CNTNAP5A, EPHB1, TTR, CD9, SERINC5, ACE, CDH9, TTYH2, ANO3, SEPP1, COL11A2, LAG3, SPP1, MAG, UGT8A, PRG4, SPARC, TMEM130, MCAM, PRELP, LCN2, VWF, PTGDS, GAA, HSD11B1, EMP2, ADAMTS4	95	3444	16021	1.762809462681093	0.1169245254902026	0.1169245254902026	0.4766310797199691
UP_SEQ_FEATURE	transmembrane region	36	3.825717321997875	0.008680731238616445	ENPP6, TSPAN2, LRRC8C, ATP10A, RPRM, AQP4, PAQR8, MFSD2A, LPAR1, CLDN11, SDC4, MOG, SLC7A5, EPHB1, CNTNAP5A, CD9, SERINC5, ACE, SLC16A1, CDH9, TTYH2, ANO3, D10BWG1379E, LAG3, MAG, PLP1, UGT8A, FA2H, MAL, FIBCD1, GJB6, TMEM130, MCAM, TRIM59, HSD11B1, EMP2	95	4113	16021	1.4760796959576183	0.955512645080259	0.5407394451368981	11.271926414993894
SP_PIR_KEYWORDS	signal	31	3.294367693942614	2.9247018146368866E-4	APOOL, ENPP6, FMOD, SDC4, TIMP2, MOG, EPHB1, CNTNAP5A, TTR, ACE, CDH9, SEPP1, COL11A2, LAG3, SPP1, MAG, LYZ2, UGT8A, PRG4, MGP, SPARC, TMEM130, MCAM, FCRLS, PRELP, LCN2, VWF, PTGDS, GAA, IGFBP5, ADAMTS4	97	2970	17854	1.9211843521121872	0.059028752868274914	0.01509557589052013	0.3683084950317439
UP_SEQ_FEATURE	signal peptide	31	3.294367693942614	0.001212259989250224	APOOL, ENPP6, FMOD, SDC4, TIMP2, MOG, EPHB1, CNTNAP5A, TTR, ACE, CDH9, SEPP1, COL11A2, LAG3, SPP1, MAG, LYZ2, UGT8A, PRG4, MGP, SPARC, TMEM130, MCAM, FCRLS, PRELP, LCN2, VWF, PTGDS, GAA, IGFBP5, ADAMTS4	95	2963	16021	1.7643959713661477	0.35146502683855896	0.194683308777571	1.6501057387704132
UP_SEQ_FEATURE	topological domain:Cytoplasmic	26	2.763018065887354	0.016052965084519182	ENPP6, TSPAN2, ATP10A, AQP4, PAQR8, CLDN11, LPAR1, SDC4, MOG, EPHB1, CNTNAP5A, CD9, SLC16A1, ACE, SERINC5, CDH9, TTYH2, ANO3, LAG3, MAG, PLP1, MAL, GJB6, TMEM130, MCAM, HSD11B1	95	2780	16021	1.5772283226050738	0.9969032616209963	0.5619156003408023	19.9073319813698
UP_SEQ_FEATURE	topological domain:Extracellular	25	2.6567481402763016	0.0013770002179153947	MAG, ENPP6, PLP1, TSPAN2, ATP10A, AQP4, MAL, PAQR8, GJB6, LPAR1, CLDN11, MCAM, SDC4, TMEM130, MOG, CNTNAP5A, EPHB1, CD9, SERINC5, ACE, SLC16A1, CDH9, TTYH2, ANO3, LAG3	95	2174	16021	1.9393066382607855	0.38855351864581933	0.15123756505047437	1.8723884108202915
SP_PIR_KEYWORDS	disulfide bond	22	2.3379383634431457	0.020585861402923296	MAG, FMOD, PLP1, LYZ2, PRG4, MGP, SPARC, TIMP2, MCAM, SLC7A5, MOG, CNTNAP5A, PRELP, LCN2, VWF, CD9, ACE, PTGDS, GAA, LAG3, ADAMTS4, IGFBP5	97	2469	17854	1.6400813384942357	0.9867868984332206	0.38166653374000636	23.078827299569117
UP_SEQ_FEATURE	disulfide bond	20	2.1253985122210417	0.09658007687494553	MAG, FMOD, PLP1, LYZ2, PRG4, MGP, SPARC, TIMP2, MCAM, MOG, CNTNAP5A, PRELP, LCN2, VWF, ACE, PTGDS, GAA, LAG3, ADAMTS4, IGFBP5	95	2379	16021	1.4177562443308775	0.9999999999999998	0.866603326642591	75.17230616366537
SP_PIR_KEYWORDS	Secreted	17	1.8065887353878853	0.003586027643110788	FMOD, APOOL, PRG4, MGP, SPARC, TIMP2, PRELP, LCN2, VWF, TTR, ACE, PTGDS, SEPP1, COL11A2, ADAMTS4, SPP1, IGFBP5	97	1420	17854	2.2035574270364453	0.5263252401659574	0.11709622457072266	4.4305518319451735
SP_PIR_KEYWORDS	cell adhesion	9	0.9564293304994688	0.0010166995865506033	VWF, MAG, CD9, CDH9, CDH19, MCAM, MOG, CNTNAP5A, SPP1	97	380	17854	4.359359739555073	0.1906963475884479	0.04143338326903723	1.2749635568323314
SP_PIR_KEYWORDS	extracellular matrix	8	0.8501594048884166	1.5127271527313896E-4	VWF, FMOD, SPARC, TIMP2, COL11A2, PRELP, ADAMTS4, SPP1	97	213	17854	6.913121339722181	0.030977167961787844	0.010434216867821311	0.19065436344815057
SP_PIR_KEYWORDS	transmembrane protein	6	0.6376195536663124	0.04935104231525663	MAG, ACE, PLP1, HSD11B1, SDC4, MOG	97	370	17854	2.9847868487043745	0.9999731961805601	0.555038104251945	47.1874598616218
KEGG_PATHWAY	mmu04512:ECM-receptor interaction	4	0.4250797024442083	0.008132125056190063	VWF, SDC4, COL11A2, SPP1	30	83	5738	9.217670682730924	0.3669847619191985	0.3669847619191985	7.746313222142809
SP_PIR_KEYWORDS	palmitate	4	0.4250797024442083	0.09958087745389171	MAG, CD9, PLP1, LPAR1	97	206	17854	3.5740166149534582	0.9999999996654203	0.766492962184641	73.37154398200308
UP_SEQ_FEATURE	repeat:LRR 12	4	0.4250797024442083	0.01121574695978213	FMOD, ERBB2IP, LRRC8C, PRELP	95	79	16021	8.538840772818121	0.9821659375444471	0.5530591437869685	14.334174121609422
UP_SEQ_FEATURE	repeat:LRR 11	4	0.4250797024442083	0.014988543370680991	FMOD, ERBB2IP, LRRC8C, PRELP	95	88	16021	7.66555023923445	0.9954444837657175	0.5928482868948758	18.71063248420247
UP_SEQ_FEATURE	repeat:LRR 10	4	0.4250797024442083	0.022690558030010854	FMOD, ERBB2IP, LRRC8C, PRELP	95	103	16021	6.549207971384773	0.999723651081678	0.5976477643736685	27.00892524154973
UP_SEQ_FEATURE	repeat:LRR 9	4	0.4250797024442083	0.035007095441755634	FMOD, ERBB2IP, LRRC8C, PRELP	95	122	16021	5.529249352890423	0.9999970138552209	0.6854154780000943	38.66383693085227
UP_SEQ_FEATURE	repeat:LRR 8	4	0.4250797024442083	0.043428810262641594	FMOD, ERBB2IP, LRRC8C, PRELP	95	133	16021	5.07194301543332	0.9999998693603934	0.7331055320865085	45.61260946620697
UP_SEQ_FEATURE	compositionally biased region:Cys-rich	4	0.4250797024442083	0.04424041740162195	FMOD, SERINC5, EPHB1, PRELP	95	134	16021	5.034092694422624	0.9999999035122934	0.7113683189818824	46.2421822121131
UP_SEQ_FEATURE	repeat:LRR 7	4	0.4250797024442083	0.0649484338840878	FMOD, ERBB2IP, LRRC8C, PRELP	95	157	16021	4.296614146832048	0.9999999999612479	0.8195707973697489	60.19386696941724
UP_SEQ_FEATURE	lipid moiety-binding region:S-palmitoyl cysteine	4	0.4250797024442083	0.08373300742734299	MAG, CD9, PLP1, LPAR1	95	175	16021	3.854676691729323	0.9999999999999724	0.8752258565090358	69.86615788628345
UP_SEQ_FEATURE	repeat:LRR 6	4	0.4250797024442083	0.0950671641189647	FMOD, ERBB2IP, LRRC8C, PRELP	95	185	16021	3.646315789473684	0.9999999999999997	0.877272104164045	74.59586977348249
SP_PIR_KEYWORDS	myelin	3	0.3188097768331562	8.553466373686798E-5	CNP, MOG, MBP	97	3	17854	184.06185567010309	0.017634628394326946	0.008856533288105095	0.10784352341232095
SP_PIR_KEYWORDS	proteoglycan	3	0.3188097768331562	0.02965351454683659	FMOD, PRG4, SDC4	97	50	17854	11.043711340206185	0.998091104567342	0.40653035341172705	31.594738909346564
UP_SEQ_FEATURE	domain:Ig-like C2-type 3	3	0.3188097768331562	0.09253281233523825	MAG, MCAM, LAG3	95	87	16021	5.81524500907441	0.9999999999999991	0.8854216295406478	73.60237633784703
SP_PIR_KEYWORDS	bone	2	0.21253985122210414	0.016045153707557613	MGP, SPP1	97	3	17854	122.70790378006872	0.965419189014755	0.3433190818063331	18.457173092212486
SP_PIR_KEYWORDS	metal-thiolate cluster	2	0.21253985122210414	0.021336715258737617	MT2, MT1	97	4	17854	92.03092783505154	0.988735147311165	0.36148287181480687	23.819403964640017
SP_PIR_KEYWORDS	metal binding	2	0.21253985122210414	0.02660011443674062	MT2, MT1	97	5	17854	73.62474226804123	0.9963306554240355	0.39938115532016283	28.829288151806974
UP_SEQ_FEATURE	region of interest:Beta	2	0.21253985122210414	0.017499909829514528	MT2, MT1	95	3	16021	112.42807017543859	0.9981687914421624	0.5451772013927679	21.507910996212274
UP_SEQ_FEATURE	region of interest:Alpha	2	0.21253985122210414	0.017499909829514528	MT2, MT1	95	3	16021	112.42807017543859	0.9981687914421624	0.5451772013927679	21.507910996212274
UP_SEQ_FEATURE	metal ion-binding site:Divalent metal cation; cluster B	2	0.21253985122210414	0.023265611444281867	MT2, MT1	95	4	16021	84.32105263157895	0.9997760233105063	0.568460770193584	27.595849899025314
UP_SEQ_FEATURE	metal ion-binding site:Divalent metal cation; cluster A	2	0.21253985122210414	0.023265611444281867	MT2, MT1	95	4	16021	84.32105263157895	0.9997760233105063	0.568460770193584	27.595849899025314

## Sheet: affected by age
Category	Term	Count	%	PValue	Genes	List Total	Pop Hits	Pop Total	Fold Enrichment	Bonferroni	Benjamini	FDR
SP_PIR_KEYWORDS	phosphoprotein	1212	4.122589203714412	1.025023069346572E-20	MEF2C, LDHB, LDHA, ITSN2, SART3, AMOTL1, USP54, TMEM145, CUL7, GRIN2B, MAP3K9, GRIN2D, DHX33, A830018L16RIK, GATM, KIF5B, LIG1, KIF5C, LIFR, BSN, MARK3, MYH9, PROX1, BRAP, JUP, MAPK1, DCAF6, F5, MAPK6, ZWINT, MAPK7, UNC13C, SH3GL2, UNC13A, SH3GL1, RALGPS2, CRTC1, NFKBIB, CACNB1, RAB6, GM12791, CACNB3, CACNB4, ACSBG1, SLC29A1, PFN2, VWA5B1, SLC29A4, EFR3A, PABPC1, SPP1, UNC119, ESRRB, TAOK3, ACACA…	2817	6311	17854	1.2171752787574952	6.088637031918638E-18	1.5221592579796594E-18	1.5117992260230366E-17
SP_PIR_KEYWORDS	membrane	1068	3.6327766250552744	6.775718792798439E-19	SCN3B, GRIN3A, DIRAS1, CDH20, DIRAS2, TMEM145, PIP5KL1, GRIN2B, AQP11, GRIN2D, CDH24, LRRC3, ARC, ICOSL, GATM, TMIE, LRRC1, LIFR, TMEM130, JUP, SSTR4, SSTR5, TMEM136, SSTR1, BACE2, ARL8B, DOC2B, UNC13C, PMP22, UNC13A, SH3GL2, SH3GL1, ORAI2, RALGPS2, SCN1A, SCN1B, CACNB1, RAB6, SLC29A1, ALCAM, TMEM125, SLC29A4, EFR3A, LFNG, NAT14, GUCY2G, ATP11C, CAMK2N1, CYP7B1, TMEM117, TSGA10, RGS6, BTBD11, OPR…	2817	5507	17854	1.2291499269107204	4.024776962922273E-16	5.749681375603247E-17	9.993459399145456E-16
SP_PIR_KEYWORDS	alternative splicing	821	2.7926119936052247	6.865940615776986E-8	MEF2C, MED25, RORC, RORB, MYLIP, ITSN2, SART3, USP54, PIP5KL1, CUL7, MED27, A830018L16RIK, ICOSL, LRRC1, LIFR, BSN, MARK3, BRAP, ABAT, MAPK7, RALGPS2, CACNB1, RAB6, GM12791, CACNB3, CACNB4, SLC29A1, PFN2, VWA5B2, DUSP15, 1300010F03RIK, EFR3A, 6530418L21RIK, ATP11C, COL16A1, GAS7, CCL27A, TSGA10, PARP6, TRAFD1, BTBD11, OPRM1, GM98, FGF5, GFAP, H2-D1, 4833424O15RIK, PMVK, YBX2, SNPH, ALS2CL, PGAP3,…	2817	4481	17854	1.161226388988905	4.0782857016141705E-5	1.773202282673303E-6	1.0126522144160433E-4
UP_SEQ_FEATURE	splice variant	812	2.7619987074390284	0.02301176211514009	MEF2C, MED25, RORC, RORB, MYLIP, ITSN2, SART3, USP54, PIP5KL1, CUL7, MED27, A830018L16RIK, ICOSL, LRRC1, LIFR, BSN, MARK3, BRAP, ABAT, MAPK7, RALGPS2, CACNB1, RAB6, GM12791, CACNB4, SLC29A1, PFN2, VWA5B2, DUSP15, 1300010F03RIK, EFR3A, 6530418L21RIK, ACACA, ATP11C, COL16A1, GAS7, CCL27A, TSGA10, PARP6, TRAFD1, PARP1, BTBD11, GM98, FGF5, GFAP, H2-D1, 4833424O15RIK, PMVK, YBX2, SNPH, ALS2CL, PGAP3, …	2765	4448	16021	1.0577565795464894	1.0	0.7683845171080217	36.256991583296184
UP_SEQ_FEATURE	transmembrane region	765	2.602129324126671	0.005477425037138961	KCNE1L, SLC9A7, SLC9A4, SCN3B, CDH20, NKPD1, TMEM145, HTR1A, GRIN2B, AQP11, GRIN2D, CDH24, PTPRJ, LRRC3, PTPRK, TYRO3, ICOSL, AI316807, PTPRM, PTPRG, CDHR1, CLCA6, TMIE, LIFR, CCDC136, TMEM132A, LHFP, TMEM130, PTPRN, YIF1A, TMEM132C, SSTR4, SSTR5, TMEM136, SSTR1, BACE2, SPAG4, ST14, PMP22, FAM163B, ORAI2, IL1R1, SCN1B, PCDH20, SORCS1, KCNJ2, SLC29A1, ALCAM, HCRTR1, DAGLA, PVRL1, TMEM125, SLC29A4,…	2765	4113	16021	1.0776983313614619	0.9999999999999885	0.43621457855776313	10.079060683370955
SP_PIR_KEYWORDS	glycoprotein	756	2.5715160379604747	2.9494935451241224E-21	KCNE1L, CTHRC1, A2M, LTBP1, PTGS2, SLC9A4, SCN3B, CRHBP, LTBP4, OGN, ERO1LB, CDH20, TMEM145, HTR1A, SERPINE2, GRIN2B, GRIN2D, CDH24, PTPRJ, PTPRK, TYRO3, ICOSL, PTPRM, PTPRG, OLFML2B, CDHR1, CLCA6, LIFR, BSN, TMEM132A, TMEM130, PTPRN, PCLO, TMEM132C, SSTR4, SSTR5, NPC2, F5, SSTR1, BACE2, ST14, ADAMTS1, PMP22, ADAMTS4, IL1R1, SCN1B, A, PCDH20, SORCS1, SLC29A1, ALCAM, HCRTR1, DAGLA, PVRL1, VWA5B1, …	2817	3600	17854	1.330969116080937	1.751999165803729E-18	8.759995829018644E-19	4.350187027030645E-18
UP_SEQ_FEATURE	glycosylation site:N-linked (GlcNAc...)	722	2.4558658457770672	1.2632238369696475E-10	KCNE1L, CTHRC1, A2M, LTBP1, PTGS2, SLC9A4, SCN3B, CRHBP, LTBP4, OGN, ERO1LB, CDH20, TMEM145, HTR1A, SERPINE2, GRIN2B, GRIN2D, CDH24, PTPRJ, PTPRK, TYRO3, ICOSL, PTPRM, PTPRG, OLFML2B, CDHR1, CLCA6, LIFR, TMEM132A, TMEM130, PTPRN, TMEM132C, SSTR4, SSTR5, NPC2, F5, SSTR1, BACE2, ST14, ADAMTS1, PMP22, ADAMTS4, IL1R1, SCN1B, A, PCDH20, SORCS1, SLC29A1, ALCAM, HCRTR1, DAGLA, PVRL1, VWA5B1, SLC29A4, PV…	2765	3444	16021	1.2146986241239317	7.381014932583696E-7	7.381014932583696E-7	2.4434148038210424E-7
SP_PIR_KEYWORDS	cytoplasm	597	2.0306813156910097	1.6171604298317914E-10	LDHB, LDHA, CROCC, MYLIP, ITSN2, SART3, PIP5KL1, BHLHB9, NAA10, PLS1, PLS3, ARC, KIF5B, MAGI1, ROCK2, PCBD1, LRRC1, BSN, SPIRE2, PCM1, CTNNA1, BRAP, GLTP, CTNNA2, JUP, SPAG9, PITPNM1, DCAF7, TRAPPC9, SPAG4, MAPK7, ARL8B, UNC13C, MYO18A, SH3GL2, UNC13A, SH3GL1, CPSF3L, RALGPS2, NFKBIB, CRTC1, RHPN2, FAM19A2, ARF5, HSPA1B, ACSBG1, DUSP18, PFN2, NPHP4, CDC42EP2, RILPL1, RILPL2, CDC42EP1, 2610018G03R…	2817	3029	17854	1.2491763151445856	9.605934991885334E-8	6.003709640545196E-9	2.385138975213863E-7
SP_PIR_KEYWORDS	signal	593	2.017075410728256	1.9478654211167855E-11	CTHRC1, A2M, LTBP1, PTGS2, SCN3B, CRHBP, LTBP4, OGN, ERO1LB, CDH20, SERPINE2, GRIN2B, CTGF, GRIN2D, CDH24, PTPRJ, LRRC3, PTPRK, TYRO3, ICOSL, PTPRM, CRTAC1, PTPRG, CLCA6, CDHR1, TMIE, OLFML2B, LIFR, TMEM132A, LHFP, TMEM130, PTPRN, TMEM132C, NPC2, F5, BACE2, ADAMTS1, ADAMTS4, IL1R1, SCN1B, A, PCDH20, SORCS1, FAM132A, FAM19A2, FAM19A1, FAM19A4, MANF, ADCYAP1, ALCAM, PVRL1, VWA5B1, PVRL3, 1300010F03…	2817	2970	17854	1.2654556450793584	1.1570312596909105E-8	7.71354202733221E-10	2.8728908141317788E-8
UP_SEQ_FEATURE	signal peptide	593	2.017075410728256	9.739931777707945E-6	CTHRC1, A2M, LTBP1, PTGS2, SCN3B, CRHBP, LTBP4, OGN, ERO1LB, CDH20, SERPINE2, GRIN2B, CTGF, GRIN2D, CDH24, PTPRJ, LRRC3, PTPRK, TYRO3, ICOSL, PTPRM, CRTAC1, PTPRG, CLCA6, CDHR1, TMIE, OLFML2B, LIFR, TMEM132A, LHFP, TMEM130, PTPRN, TMEM132C, NPC2, F5, BACE2, ADAMTS1, ADAMTS4, IL1R1, SCN1B, A, PCDH20, SORCS1, FAM132A, FAM19A2, FAM19A1, FAM19A4, MANF, ADCYAP1, ALCAM, PVRL1, VWA5B1, PVRL3, 1300010F03…	2765	2963	16021	1.159624885339928	0.05532157322843634	0.011317608221465991	0.018837964191831258
UP_SEQ_FEATURE	topological domain:Cytoplasmic	555	1.8878193135820946	3.0122344963145526E-5	KCNE1L, SLC9A4, SCN3B, CDH20, HTR1A, GRIN2B, GRIN2D, CDH24, PTPRJ, PTPRK, TYRO3, ICOSL, PTPRM, PTPRG, CDHR1, TMIE, LIFR, TMEM132A, TMEM130, PTPRN, YIF1A, TMEM132C, SSTR4, SSTR5, SSTR1, BACE2, ST14, IL1R1, SCN1B, PCDH20, SORCS1, KCNJ2, SLC29A1, ALCAM, HCRTR1, DAGLA, PVRL1, SLC29A4, PVRL3, LFNG, GUCY2G, ATP11C, KCNK2, KCNK3, PCDH19, PCDH18, KCNJ5, KCNJ4, KCNJ6, CLGN, KCNJ9, TGFBR3, GPR83, OPRM1, KC…	2765	2780	16021	1.1567584268932052	0.16138831676726828	0.024830454575609506	0.05824862115261231
SP_PIR_KEYWORDS	disulfide bond	461	1.5680805469573795	2.2423227825114682E-5	A2M, LTBP1, PTGS2, SCN3B, LTBP4, CRHBP, GFER, OGN, ERO1LB, HTR1A, CTGF, PTPRK, TYRO3, ICOSL, PTPRM, CRTAC1, OLFML2B, LIFR, SSTR4, SSTR5, NPC2, F5, SSTR1, BACE2, ST14, ADAMTS1, ADAMTS4, IL1R1, SCN1B, A, MANF, ALCAM, PVRL1, PVRL3, NTF3, HGF, EMILIN2, GAS6, CLGN, PENK, CCL27A, GPR83, OPRM1, GPR85, GLRA1, LDLR, GLRA3, H2-D1, PDIA4, ST6GALNAC5, XYLT2, XYLT1, VKORC1, IL13RA1, PRSS35, AVP, PRSS52, CAR12…	2817	2469	17854	1.1833916999620282	0.013231234030194217	3.9167464787026596E-4	0.03306676158387756
UP_SEQ_FEATURE	disulfide bond	441	1.5000510221436103	0.04527988495179754	A2M, LTBP1, PTGS2, SCN3B, LTBP4, CRHBP, GFER, OGN, ERO1LB, HTR1A, CTGF, PTPRK, TYRO3, ICOSL, PTPRM, CRTAC1, OLFML2B, LIFR, SSTR4, SSTR5, NPC2, F5, SSTR1, BACE2, ST14, ADAMTS1, ADAMTS4, IL1R1, SCN1B, A, MANF, ALCAM, PVRL1, PVRL3, NTF3, HGF, EMILIN2, GAS6, CLGN, PENK, CCL27A, GPR83, OPRM1, GPR85, GLRA1, LDLR, GLRA3, H2-D1, PDIA4, ST6GALNAC5, VKORC1, IL13RA1, PRSS35, AVP, PRSS52, CAR12, MMP17, MMP16…	2765	2379	16021	1.0740849521924434	1.0	0.90309550779893	59.19164037574885
UP_SEQ_FEATURE	topological domain:Extracellular	431	1.4660362597367258	5.415118540009166E-4	SCN3B, SLC9A4, CDH20, HTR1A, GRIN2B, GRIN2D, CDH24, PTPRJ, PTPRK, TYRO3, ICOSL, PTPRM, PTPRG, TMIE, CDHR1, LIFR, TMEM132A, PTPRN, TMEM130, YIF1A, TMEM132C, SSTR4, SSTR5, SSTR1, BACE2, ST14, IL1R1, SCN1B, PCDH20, KCNJ2, ALCAM, SLC29A1, HCRTR1, DAGLA, PVRL1, SLC29A4, PVRL3, GUCY2G, ATP11C, PCDH19, PCDH18, KCNJ5, KCNJ4, KCNJ6, KCNJ9, TGFBR3, GPR83, OPRM1, GPR85, LDLR, GLRA1, GLRA3, DPP10, ATP10A, H2…	2765	2174	16021	1.1487147964352673	0.9577820907700649	0.15344004285967894	1.0422438347123975
SP_PIR_KEYWORDS	cell membrane	393	1.3367801625905644	3.5240627770012733E-16	SLC9A4, GRIN3A, GNG8, CDH20, DIRAS1, HTR1A, DIRAS2, GRIN2B, GRIN2D, GNG4, CDH24, GNG7, TYRO3, ARC, MAGI1, ROCK2, CLCA6, CDHR1, LIFR, CTNNA1, CTNNA2, SSTR4, SSTR5, SSTR1, UNC13C, UNC13A, RALGPS2, PCDH20, CACNB1, HCRTR1, DAGLA, PVRL1, SLC29A4, PVRL3, EFR3A, PCDH10, PCDH19, CAMK2N1, PCDH18, TGFBR3, GPR83, OPRM1, GPR85, LZTS1, GLRA1, GLRA3, H2-D1, GPR88, ASAH2, LNPEP, DDI2, PIK3AP1, SLC22A6, STRA6, S…	2817	1713	17854	1.454065167263804	1.978417429882029E-13	2.19824158875781E-14	4.884981308350689E-13
SP_PIR_KEYWORDS	transport	297	1.0102384434844724	3.554709441276799E-4	SLC9A7, SLC9A4, ATP1B2, SCN3B, SLC9A2, RAB1B, GRIN3A, AQP1, SLC26A11, HOOK3, ERO1LB, APOD, GRIN2B, AQP11, GRIN2D, CHRNA5, CHRNA4, CHRNA7, CHRNA6, OSBP2, SLC12A8, CLCA6, SPIRE2, YIF1A, GLTP, PITPNM1, RYR1, RAB15, RYR2, RBP4, KCNMB4, SCN1A, SCN1B, CLCN2, CACNB1, RAB6, XK, CACNB3, CACNB4, ARF5, RIMS2, KCNJ2, RIMS4, RIMS3, SLC29A1, SLC32A1, SLC29A4, OSBPL5, TRPC1, TRPC3, TRPC6, OSBPL9, TRPC7, KCNK2, …	2817	1571	17854	1.1981989860144837	0.19037757219690166	0.004580505134954338	0.5230023252556171
SP_PIR_KEYWORDS	nucleotide-binding	293	0.9966325385217184	0.008183177138004963	KIFC2, ADCY1, ADCY2, ADCY7, ADCY8, RAB1B, PRKG2, DIRAS1, DIRAS2, PIP5KL1, MAP3K9, DHX33, RAPGEF4, KIF13B, TYRO3, BCR, KIF5B, MAGI1, ROCK2, HKDC1, LIG1, KIF5C, WNK1, PIM1, MARK3, MYH9, CARNS1, RND2, MAPK1, RND3, DNAHC3, RND1, NAV1, MAPK6, CAMK1, RAB15, ARL8B, MAPK7, EEFSEC, MYO18A, NEK7, GNAI1, NEK1, RAB6, HSPA1B, ARF5, EPHB3, RAB40B, ACSBG1, EPHB2, EPHB6, 2610018G03RIK, 1300010F03RIK, GM12892, DC…	2817	1631	17854	1.1385768328274053	0.9924090976948522	0.07570376519918842	11.413404671905191
SP_PIR_KEYWORDS	transcription regulation	271	0.9218000612265723	0.03256211668561695	MEF2C, EIF2C2, STAT5B, MED25, RORC, RORB, CITED2, ZFP92, EPC2, SIN3B, MED27, RARA, TWIST1, RCOR1, BARHL2, ZFP628, ZHX2, TBR1, PROX1, MED10, PRDM8, MSX1, MED16, BHLHA9, FOXG1, ZFP821, VGLL3, PIAS2, PIAS1, SUPT6H, UNCX, 3110039M20RIK, CRTC1, OTP, ARX, HEXIM2, LHX1, HTATSF1, LHX2, NKX2-1, LEO1, LHX6, LHX8, TCF4, NAT14, KLF5, DNMT3A, KLF8, SMAD9, KLF9, KLF12, KLF13, ESRRB, KLF10, SMAD4, KLF16, SMAD3,…	2817	1546	17854	1.1109857403373806	0.999999997115203	0.2087117707613595	38.63002121621272
SP_PIR_KEYWORDS	Secreted	266	0.9047926800231301	0.0012826911840866024	CTHRC1, A2M, LTBP1, EFNA1, NELL1, LTBP4, FAM20C, NELL2, EDIL3, LUZP2, SHH, NOV, OGN, RTBDN, BDNF, APOD, SERPINE2, CTGF, SOSTDC1, CCBE1, COL12A1, MATN2, STC2, CRTAC1, PMCH, CLCA6, OLFML2B, LIFR, VASH1, PRELP, NPC2, F5, ADAMTS1, CHGB, ADAMTS4, RBP4, OLFM4, A, FAM132A, FAM19A1, FAM19A4, MANF, ADCYAP1, ITGBL1, EPHB6, LGALS3BP, VWA5B1, 1300010F03RIK, OLFM3, AGRP, SPP1, COL18A1, BMP4, PLAT, BMP3, NTF3,…	2817	1420	17854	1.1872494462693808	0.5334581885433973	0.014554726147241515	1.875240859115468
SP_PIR_KEYWORDS	transferase	246	0.836763155209361	0.02398780476092699	TRMT2B, PRKG2, AGXT2L1, PIP5KL1, MAP3K9, NAA10, GXYLT1, TYRO3, BCR, GATM, ROCK2, HKDC1, PIM1, WNK1, GSTT1, GSTT2, GSTT3, MARK3, MAPK1, MAPK6, HAS1, GM13910, CAMK1, ABAT, MAPK7, EXT1, NEK7, GCNT2, SULT5A1, NEK1, EPHB3, EPHB2, NAA50, 2610018G03RIK, LFNG, GM12892, NAT14, DNMT3A, MAP2K1, TAOK3, TRIO, TKT, ATM, PORCN, EPHA3, EPHA5, NTRK3, EPHA4, EPHA7, EPHA6, GBE1, EPHA8, NTRK1, PARP8, PARP6, PARP1, N…	2817	1385	17854	1.125729422574903	0.9999994549767213	0.18619526007663212	30.10016549586989
SP_PIR_KEYWORDS	atp-binding	227	0.7721351066362802	0.03800869104116662	KIFC2, ADCY1, ADCY2, ADCY7, ADCY8, PRKG2, PIP5KL1, MAP3K9, DHX33, KIF13B, TYRO3, BCR, KIF5B, MAGI1, ROCK2, HKDC1, LIG1, KIF5C, PIM1, WNK1, MYH9, MARK3, CARNS1, MAPK1, DNAHC3, NAV1, MAPK6, CAMK1, MAPK7, MYO18A, NEK7, NEK1, HSPA1B, EPHB3, EPHB2, ACSBG1, EPHB6, 2610018G03RIK, 1300010F03RIK, GM12892, DCAKD, KIF3B, MAP2K1, TAOK3, ACACA, TRIO, ATP11C, DDX5, DDX4, ATM, EPHA3, ATP13A4, EPHA5, NTRK3, EPHA…	2817	1287	17854	1.1178820784784576	0.9999999998991532	0.23722574630157145	43.53329229826064
SP_PIR_KEYWORDS	zinc-finger	217	0.7381203442293955	0.020098941103553345	PNMA3, RORC, RORB, MYLIP, ZNRF2, ZFP92, STAC, RARA, ROCK2, ZFP628, ZHX2, UBR3, BSN, PCLO, BRAP, PRDM8, ACAP2, PIAS2, ZFP821, PIAS1, UNC13C, UNC13A, RIMS2, DMD, ZFP346, KLF5, GIT1, DNMT3A, KLF8, KLF12, KLF9, ESRRB, KLF13, KLF10, KLF16, SMYD1, U2AF1L4, ZBTB44, ZFP609, CBLB, ZFHX4, RNF2, TRAFD1, PARP1, RERE, KLF3, SH3RF1, ZMAT5, ZMAT4, ZMAT2, SOBP, ZEB2, RNF182, GLI1, RBM4B, STAC2, ZFP238, NEURL1B, …	2817	1204	17854	1.1423046123618232	0.9999942158063774	0.167009510891163	25.877971949622335
SP_PIR_KEYWORDS	calcium	209	0.7109085343038879	2.930102886180905E-19	PDP1, SYT1, CADM3, SYT5, SYT2, FAM20C, SYT9, ITSN2, FAH, CDH20, GRIN2B, GRIN2D, CCBE1, PLS1, PLS3, CDH24, CDHR1, CDHR2, PCLO, PITPNM1, F5, GM7308, DOC2B, PCDH20, ITGA11, CACNB1, CACNB3, CACNB4, CALR, DAGLA, MACF1, DMD, GPD2, TRPC1, HPCAL1, BMP1, TRPC3, TRPC6, HPCAL4, PCDH10, TRPC7, CELSR2, TKT, CELSR1, PCDH19, GAS6, PCDH18, CBLB, CLGN, HPCA, ATP2A1, PLA2G4E, ARSB, PXDN, NPNT, KCNIP2, KCNIP1, KCNI…	2817	731	17854	1.812080941052152	1.7404811143914575E-16	2.900801857319096E-17	4.321587882231767E-16
SP_PIR_KEYWORDS	developmental protein	184	0.6258716282866764	1.7755344772592916E-7	MEF2C, ENAH, EIF2C2, PDLIM7, RORB, EDIL3, ZIC1, NR2E1, SHH, ZIC2, WNT2, DAB1, WNT3, SERPINE2, UNC5B, UNC5A, DDX25, CCBE1, OLIG1, ROBO2, ETL4, ROBO3, ATOH8, TWIST1, ISLR2, EDARADD, PITX2, ARC, EMX1, EFNB1, MDGA1, NKX2-9, ENC1, BARHL2, SIX3, MGP, VAX1, GRHL1, PROX1, CTNNA2, MSX1, DCAF7, NAV1, FOXG1, CAMK1, LCLAT1, RELN, EFNA5, ZFP260, STMN1, EDA, UNCX, 3110039M20RIK, TWSG1, AGFG1, TDRD7, BEX1, HSPA…	2817	814	17854	1.43265658920611	1.0546119588705771E-4	4.21866139377336E-6	2.6187199608784795E-4
SP_PIR_KEYWORDS	kinase	164	0.5578421034729072	1.5909226900011337E-7	STK33, ITPKB, PRKG2, ITPKA, PRKAR2A, PIP5KL1, MAP3K9, STK39, TYRO3, RET, BCR, PDXK, CSNK1G1, ROCK2, HKDC1, PNCK, PKIG, WNK1, PIM1, MARK3, STK4, PKIA, CDKL2, CDKL5, CDKL4, MAP4K3, MAPK1, MAP4K5, CDKL1, MAPK6, CAMK1, AKAP6, AKAP7, MAPK7, AKAP2, KALRN, NEK7, FGFR1, CDK5R2, NEK1, MAP4K2, AKAP12, AKAP13, ULK4, EPHB3, EPHB2, PTK2, SBK1, 2610018G03RIK, PRKRA, LMTK2, LMTK3, DYRK3, DYRK2, GM12892, TYROBP,…	2817	707	17854	1.4701888262765115	9.449635025682301E-5	3.937526219521814E-6	2.3464379810267388E-4
UP_SEQ_FEATURE	mutagenesis site	160	0.5442361985101534	4.763011207698465E-4	GPRIN1, MEF2C, ENAH, PLXNA1, LGMN, STYX, LNX2, RRAD, PMAIP1, SHH, FOXO6, FAH, BDNF, PIP5KL1, GAB2, RAPGEF4, RARA, WWOX, EDARADD, NET1, RET, CMAS, RELB, PIM1, CBLN1, MSX1, ARRB2, RASGRF2, F5, HAS1, CAR8, RELN, CELF1, ADAMTS1, PIAS1, AKAP2, UNC13A, ARPP21, BLM, LITAF, SSH2, RAB6, MEIS1, ACSBG1, PTK2, LHX1, PLCH2, DYRK3, CLASP2, PRIMA1, AMD1, FBXO45, BLNK, FN1, ZFP346, COL18A1, HCN1, HCN2, DNMT3A, M…	2765	723	16021	1.2822602227507947	0.9381900199908173	0.15104279168439816	0.9172809886037192
SP_PIR_KEYWORDS	lipoprotein	149	0.5068199598625803	1.7647219418209323E-9	GPRIN1, SYT1, EFNA1, EFNA3, RAB1B, ADORA1, SHH, ZNRF2, GNG8, DIRAS1, DIRAS2, S1PR1, ANK1, GALR1, S1PR5, GNG4, GNG7, MDGA1, LRP1B, HTR4, BSN, BASP1, NTSR1, SSTR4, RND2, RND3, SSTR5, RND1, CD59A, SSTR1, LSAMP, HTR7, PCMTD1, RAB15, EFNA5, AKAP7, CPD, CAR4, AKAP2, PALM, ACHE, DRD2, KCNA2, DRD5, RAB6, CNTFR, KCNA6, ARF5, KCNA5, BDKRB2, NRN1, RAB40B, GAD2, FOLR1, DNAJA1, SFTPC, GRID2IP, ADRA2B, SCARB2,…	2817	589	17854	1.6033179585743362	1.0482442744930154E-6	5.241223977048293E-8	2.6027757726865275E-6
UP_SEQ_FEATURE	compositionally biased region:Pro-rich	149	0.5068199598625803	0.005464869219997999	PRR18, ENAH, LTBP1, PRR13, LTBP4, MED25, RGL3, CD2AP, FOXO6, PNN, GAB1, RC3H2, ETL4, ROBO3, ATOH8, RAPGEF2, BCL7C, ATG9B, CDHR1, RPUSD1, BARHL2, ZFP628, SOCS7, MTAP1S, GSE1, TRERF1, BC057022, FOXG1, PYGO1, MAPK7, UNCX, 3110039M20RIK, COBL, ONECUT3, SETD1B, ADAMTSL4, FAM132A, ZFP768, ARX, PTK2, SBK1, GRID2IP, LMTK3, IQSEC3, BLNK, IQSEC2, SASH1, HCN2, PHACTR3, MAP2K1, NR4A2, TEAD1, EVL, EMILIN2, WH…	2765	707	16021	1.2211284212895586	0.9999999999999876	0.44130970906654476	10.057099370226519
SP_PIR_KEYWORDS	ion transport	147	0.5000170073812035	1.3230417293936426E-11	KCNC2, KCNC1, KCNC4, SLC9A7, KCNC3, GABRB3, GABRB2, SCN3B, SLC9A4, ATP1B2, GRIK4, SLC9A2, GRIK5, CNGB1, GRIN3A, SLC26A11, GRIN2B, GRIN2D, CHRNA5, SLCO1C1, CHRNA4, CHRNA7, CHRNA6, NALCN, SLC4A4, SLC12A8, SLCO4A1, SLC22A23, STIM2, KCNT1, RYR1, RYR2, SLC25A37, SLC38A1, KCNMB4, SCN1A, CLCN2, SCN1B, KCNA2, CACNB1, CACNB3, KCNA6, CACNB4, KCNA5, KCNJ2, KCNS3, TTYH2, SCN9A, SLC30A3, HCN3, GABRQ, GABRD, H…	2817	543	17854	1.715798123861245	7.858867556720384E-9	5.613476350418978E-10	1.9513446414265445E-8
SP_PIR_KEYWORDS	cytoskeleton	136	0.4626007687336304	1.4337222627992751E-6	CTNNAL1, SNCG, ENAH, SRCIN1, PDLIM7, CROCC, CD2AP, KLHL2, KLHL1, HOOK3, ANK1, ARC, TWF2, KIF5B, ENC1, ACTN1, BSN, MTAP1S, TMSB10, SPIRE2, PCM1, CTNNA1, TACC1, CTNNA2, ARPC1A, JUP, DNAHC3, RND1, NAV1, FNBP1L, SPAG4, CLIP1, ARL8B, ERC2, GM7308, MYO18A, DST, ADD3, ADD2, KALRN, ADD1, ACTR3B, SSH2, AKAP12, ANLN, ARPC5, CAPZB, PFN2, CDC42EP2, NPHP4, CDC42EP1, ARPC3, MACF1, GM16372, CRMP1, ARPC2, DMD, S…	2817	583	17854	1.4784921978845662	8.51269099307439E-4	3.0414952977508847E-5	0.002114565914801414
UP_SEQ_FEATURE	active site:Proton acceptor	136	0.4626007687336304	0.01809756056569669	STK33, LDHB, LDHA, PTGS2, CNP, PRKG2, FAH, MAP3K9, STK39, WWOX, CHAT, TYRO3, RET, CSNK1G1, ROCK2, PNCK, WNK1, QDPR, PIM1, MARK3, CDKL2, STK4, CDKL5, CDKL4, MAP4K3, MAPK1, MAP4K5, CDKL1, MAPK6, GM13910, CAMK1, MAPK7, KALRN, NEK7, MDH1, FGFR1, ME3, ME2, ALDOC, NEK1, MAP4K2, ULK4, EPHB3, EPHB2, GPD1L, PTK2, SBK1, 2610018G03RIK, LMTK2, LMTK3, DYRK3, DYRK2, GPD1, MAP2K1, EPHX4, TAOK3, EPHX2, TRIO, EPH…	2765	662	16021	1.190351993793808	1.0	0.7150502431673262	29.76067186365189
SP_PIR_KEYWORDS	cell junction	135	0.4591992924929419	5.888458608956518E-20	SYT1, CADM3, ENAH, GABRB3, GABRB2, SYT5, SYT2, GRIK4, GRIK5, SYT9, GRIN3A, ZNRF2, PNN, GRIN2B, HOMER3, GRIN2D, CHRNA5, CHRNA4, CHRNA7, CHRNA6, LGI1, GJD2, ARC, MAGI1, BSN, CTNNA1, PCLO, CTNNA2, JUP, CBLN4, CBLN1, VAMP2, ERC2, UNC13C, UNC13A, ACHE, SSH2, RIMS2, RIMS4, RIMS3, GAD2, PTK2, GRID2IP, SSX2IP, SLC30A3, PRIMA1, GABRQ, GABRD, GABRE, PHACTR1, GABRA2, GABRA4, SYT10, GABRA3, SYT12, GABRA5, GR…	2817	392	17854	2.1827117428441025	3.4977444137201715E-17	6.995488827440343E-18	8.684845671975043E-17
UP_SEQ_FEATURE	binding site:ATP	116	0.3945712439198612	0.010579945683098401	STK33, PRKG2, ITPKA, MAP3K9, STK39, TYRO3, RET, CSNK1G1, ROCK2, HKDC1, LIG1, PNCK, PIM1, WNK1, MARK3, CDKL2, STK4, CDKL5, CDKL4, MAP4K3, MAPK1, MAP4K5, CDKL1, MAPK6, CAMK1, MAPK7, NEK7, KALRN, FGFR1, NEK1, MAP4K2, EPHB3, EPHB2, ACSBG1, PTK2, SBK1, 2610018G03RIK, LMTK2, LMTK3, DYRK3, DYRK2, GM12892, MAP2K1, TAOK3, TRIO, EPHA3, EPHA5, NTRK3, EPHA4, PLK5, EPHA7, EPHA6, PLK2, EPHA8, NTRK1, MERTK, ABL…	2765	545	16021	1.2332637656154088	1.0	0.5781756151156975	18.59511144693964
SP_PIR_KEYWORDS	ionic channel	115	0.3911697676791727	4.129005934507719E-21	KCNC2, KCNC1, KCNC4, KCNC3, GABRB3, GABRB2, SCN3B, GRIK4, GRIK5, GRIN3A, GRIN2B, GRIN2D, CHRNA5, CHRNA4, CHRNA7, NALCN, CHRNA6, KCNT1, RYR1, RYR2, KCNMB4, SCN1A, CLCN2, SCN1B, KCNA2, CACNB1, CACNB3, KCNA6, KCNA5, CACNB4, KCNJ2, KCNS3, TTYH2, SCN9A, HCN3, GABRQ, GABRD, HCN1, HCN2, GABRE, TRPC1, CACNA2D1, GABRA2, TRPC3, GABRA4, TRPC6, GABRA3, KCNB1, GABRA5, TRPC7, GRIN1, KCNK2, CACNA2D2, KCNK3, KCT…	2817	301	17854	2.4214752151448784	2.4526295250975852E-18	8.175431750325284E-19	6.089841451092967E-18
SP_PIR_KEYWORDS	differentiation	108	0.36735943399435356	1.4086897049499849E-5	MEF2C, EIF2C2, ENAH, PDLIM7, ZIC1, ZIC2, DAB1, SERPINE2, DDX25, ROBO2, ROBO3, ATOH8, EDARADD, TWIST1, EFNB1, MDGA1, MGP, CTNNA2, TRAPPC9, NAV1, CAMK1, EFNA5, STMN1, MAPK7, EDA, UNCX, AGFG1, BEX1, HSPA1B, OTP, ARX, LHX1, LHX6, NDRG2, BMP4, BMP3, BMP1, RFNG, RGNEF, GAS7, SFRP5, NOTCH3, FEZF1, NTRK3, FEZF2, SEMA6A, NOTCH2, CLGN, SEBOX, SFRP2, NTRK1, ITGA8, TUBD1, CYFIP1, NRP2, GM98, NRP1, NPNT, TTLL…	2817	460	17854	1.4880400055563272	0.00833276422987772	2.5353378774994884E-4	0.02077465225968078
SP_PIR_KEYWORDS	golgi apparatus	105	0.35715500527228816	0.02887688108288438	SLC9A7, NSG2, SLC26A11, HOOK3, ST3GAL1, ST3GAL4, NSG1, NMNAT2, TMEM132A, OPTN, TMEM130, YIF1A, PITPNM1, RND3, PLCE1, COPG2, SGSM1, TRAPPC9, BACE2, PTGFRN, EXT1, GAL3ST3, GCNT2, GRB2, RAB6, MAP4K2, GM12791, ST8SIA3, ARF5, GAD2, ECE2, 2610018G03RIK, CLASP2, LFNG, UST, RFNG, ST8SIA6, DUSP26, GOLGA7B, ARF3, ARF4, ST8SIA5, SCARA3, PCSK1N, CLCN5, SH3RF1, SEC1, NDST3, NDST4, CLSTN2, PIP5K1A, RHOU, ST6GA…	2817	553	17854	1.2034078807241748	0.9999999723986596	0.2023171370141138	35.090321676039224
UP_SEQ_FEATURE	domain:Protein kinase	105	0.35715500527228816	0.005209608110302581	STK33, PRKG2, MAP3K9, STK39, TYRO3, RET, CSNK1G1, ROCK2, PNCK, PIM1, WNK1, MARK3, CDKL2, STK4, CDKL5, CDKL4, MAP4K3, MAPK1, MAP4K5, CDKL1, MAPK6, CAMK1, MAPK7, NEK7, NRBP2, KALRN, FGFR1, NEK1, MAP4K2, ULK4, EPHB3, EPHB2, EPHB6, PTK2, SBK1, 2610018G03RIK, LMTK2, LMTK3, DYRK3, DYRK2, GUCY2G, MAP2K1, TAOK3, TRIO, EPHA3, EPHA5, NTRK3, EPHA4, PLK5, EPHA7, EPHA6, PLK2, EPHA8, NTRK1, MERTK, ABL2, CDK18,…	2765	476	16021	1.2781353047548134	0.9999999999999444	0.4503193296569561	9.609519154055512
SP_PIR_KEYWORDS	cell adhesion	104	0.3537535290315997	8.828724202643463E-9	CADM3, CADM4, ATP1B2, EDIL3, MOG, NRCAM, CDH20, CTGF, COL12A1, CDH24, TYRO3, PTPRM, CDHR1, MFGE8, CTNNA1, CTNNA2, JUP, TNFAIP6, PODXL2, CD34, LSAMP, RELN, MFAP4, DST, OLFM4, PCDH20, ITGA11, ITGB4, CX3CL1, ALCAM, LGALS3BP, PVRL1, ITGB8, PVRL3, SSX2IP, FN1, SPP1, COL18A1, PCDH10, ITGA3, ITGA4, EMILIN2, COL16A1, KITL, PCDH19, PCDH18, TMEM8B, PKP1, FREM3, LAMA5, FREM1, ITGA8, ITGA7, CYFIP2, ABL2, CLS…	2817	380	17854	1.7345963417596173	5.244248444502553E-6	2.3837552598493517E-7	1.302142166315079E-5
SP_PIR_KEYWORDS	ubl conjugation	96	0.3265417191060921	0.07644719821413708	MEF2C, THRA, SLC9A4, GABRB2, SNCA, MYLIP, TOP1, HTR1A, CUL7, INSIG1, SPRED2, PLS3, WWOX, SATB1, LIG1, ENC1, H2AFJ, CTNNA1, MSX1, RASGRF2, ARRB2, PIAS2, PIAS1, GM7308, ADD3, HIST1H4K, BEX1, ANLN, KCNA5, GM11560, NUMB, SCN9A, TRAF7, DNMT3A, KLF8, MAFB, KLF10, GABRA5, SMAD4, KCTD1, SMAD2, HNRNPA1, HDAC4, CBLB, HDAC1, GPR37, COX6A2, HIVEP2, MAFA, HDAC9, CLCN5, KLF3, KIF22, SH3RF1, ZEB2, PIP5K1A, YBX1…	2817	524	17854	1.1611508101033259	1.0	0.37068893221595267	69.0544990381677
SP_PIR_KEYWORDS	synapse	95	0.3231402428654036	4.157285173417726E-23	SYT1, ENAH, LZTS1, GLRA1, GABRB3, GABRB2, SYT5, TLN2, SYT2, GLRA3, GRIK4, GRIK5, SYT9, CPEB1, GRIN3A, GABBR2, ZNRF2, GRIN2B, HOMER3, GRIN2D, SNPH, CHRNA5, DLG4, CHRNA4, CHRNA7, CHRNA6, SV2A, LGI1, GABRG1, ANKS1B, ARC, SVOP, CTBP2, RIMBP2, BSN, PCLO, CBLN4, CBLN1, CHRM3, CHRM2, CHRM1, VAMP2, ERC2, NRGN, UNC13C, SEZ6, GAP43, UNC13A, SNAP29, HCRT, ACHE, ABI1, RIMS2, RIMS4, RIMS3, SYNPR, GAD2, SYN1, …	2817	213	17854	2.8267843958794776	2.4694273930101293E-20	2.4694273930101293E-20	6.131550299191306E-20
SP_PIR_KEYWORDS	activator	94	0.3197387666247151	0.022411918759256036	MEF2C, GM98, E2F3, STAT5B, MED25, RORB, CPEB1, NR2E1, FOXO6, PNN, MAZ, ATF6B, MED27, MKL2, HSF4, EGR1, ZFP423, TBL1XR1, EGR2, FOXJ2, RELB, LEF1, TCFAP2D, NPAS4, TRERF1, AHR, MED10, PURA, HNRPDL, SS18, EYA1, MED16, NCOA6, CELF1, ZFPM2, ZFPM1, ZFP260, GLIS3, DPF3, CAMTA2, CRTC1, SETD1B, ONECUT3, NFYB, NFIX, TRRAP, SEC14L2, SRF, TCF7L2, MEIS1, MED12L, DNER, HTATSF1, POU2F1, NKX2-1, ETV1, LEO1, BCL6,…	2817	484	17854	1.230923818492799	0.9999985789694393	0.179631693530661	28.416976055189338
UP_SEQ_FEATURE	compositionally biased region:Poly-Pro	90	0.3061328616619613	1.2009646828711632E-5	SH3RF1, KCNC3, WFS1, WASF1, FOXO6, MAZ, SLC24A4, GRIN2D, SEMA3F, PRRT1, BRI3, CAP1, ODZ1, FAM164C, IRS4, SATB1, AR, EGR2, SOX12, RUNX1T1, SOCS7, ARHGEF17, CECR6, PCLO, ZCCHC14, MAST3, SS18, ARHGAP33, FAM114A1, SEMA4G, NCOA6, CD99L2, FCHSD2, SORT1, HIPK4, KPNA4, KSR1, FAM171A2, SRGAP1, FMOD, COBL, OLFM4, CDK5R2, IRX5, FAM98B, TDRD7, IRX1, LETM2, SOX9, EPHB6, PRRG4, SORBS2, BAI2, PPP3CB, WIPF3, NCR…	2765	336	16021	1.5520214414879878	0.06776727244942515	0.011627338533624854	0.023227327749186788
PANTHER_PATHWAY	P00057:Wnt signaling pathway	87	0.2959284329398959	0.08782622971401183	CTNNAL1, PPP2R5D, GNA11, GNG8, WNT2, CDH20, PCDH1, WNT3, PLCB4, GNG4, PLCB1, CDH24, GNG7, PRKCA, PCDHB9, TBL1XR1, CTBP2, CSNK1G1, PCDHB6, CDHR1, CDHR2, PRKCH, PCDH9, TLE4, LEF1, PCDHB2, PCDH8, ARID1B, PCDH7, CTNNA1, PRKCD, PRKCC, CTNNA2, PRKCB, PRKCQ, GNAQ, ARRB2, CCND2, PYGO1, WNT9B, WNT9A, ACVR1, 2610005L07RIK, BTAF1, NKD1, NKD2, PCDH20, GNG12, PCDHB10, TCF7L2, CDH6, MYCL1, CDH7, CDH9, ERCC6, F…	659	336	2921	1.1476940169087362	0.9999929204149504	0.3662421130490877	65.66609041435673
KEGG_PATHWAY	mmu04080:Neuroactive ligand-receptor interaction	82	0.2789210517364536	4.512416966547262E-12	OPRM1, GPR83, CCKAR, MCHR1, THRA, GLRA1, GABRB3, THRB, TACR3, GABRB2, TACR1, GLRA3, GRIK4, GRIK5, GRIN3A, GABBR2, VIPR1, ADORA1, VIPR2, EDNRA, EDNRB, S1PR1, HTR1A, GRIN2B, GALR1, GRIN2D, S1PR5, GABRG1, PTGER4, CCKBR, TRHR2, HTR4, NTSR1, GRM1, SSTR4, SSTR5, GRM4, CHRM3, CHRM2, GRM8, SSTR1, HTR7, GRM7, CHRM1, HTR6, GPR50, GLP1R, CALCR, DRD2, OPRK1, NPY2R, DRD5, OXTR, BDKRB2, HCRTR1, HRH1, P2RY6, HR…	847	260	5738	2.1365725183907003	8.212550639541405E-10	8.212550639541405E-10	5.568379091158704E-9
SP_PIR_KEYWORDS	serine/threonine-protein kinase	82	0.2789210517364536	0.00318165647371623	STK33, CDK18, NUAK1, PRKG2, CAMKK1, CAMKK2, PAK6, PAK7, MAP3K9, PAK4, STK39, SIK1, PRKCA, TRPM6, BCR, CSNK1G1, ROCK2, PNCK, PIM1, WNK1, PRKCH, MINK1, CDK9, CDK6, MARK3, DAPK2, PRKCD, CDKL2, STK4, CDKL5, PRKCC, CDKL4, PRKCB, MAST3, MAP4K3, ACVR2A, HUNK, PRKCQ, MAPK1, MAP4K5, ACVR2B, CDKL1, MAPK6, HIPK2, MAP3K10, CAMK1, HIPK4, MAPK7, CAMK1D, NEK7, ACVR1, KALRN, NEK1, MAP4K2, ULK4, SBK1, SNRK, MAP3K…	2817	384	17854	1.3534160158561115	0.8493682029830658	0.03266370018312714	4.591339882369239
SP_PIR_KEYWORDS	Immunoglobulin domain	82	0.2789210517364536	0.08192386566916235	PVR, CADM3, PXDN, PSG16, CADM4, CADM2, SCN3B, BCAM, MOG, NRCAM, UNC5B, UNC5A, PCP4, SEMA3F, SEMA3E, ROBO2, ESAM, ROBO3, KIRREL2, BOC, ISLR2, TYRO3, PTPRK, ICOSL, PTPRM, CNTN5, ICAM5, CNTN6, MDGA1, NFAM1, NEXN, FCRLS, CD83, AMIGO2, CD80, SEMA4G, SEMA4F, IGSF1, LSAMP, CNTN4, PTGFRN, JAM2, NCAN, CHL1, KALRN, DCC, FGFR1, WFIKKN2, IL1R1, SCN1B, CRLF1, CNTFR, LRIG2, KIT, IGSF10, ALCAM, LINGO1, IGSF11, …	2817	443	17854	1.1731642214192932	1.0	0.3834057206610293	71.6534271815705
UP_SEQ_FEATURE	compositionally biased region:Poly-Ser	82	0.2789210517364536	0.020826843367496878	NRP2, CCKAR, FGF5, CADM2, GREB1, FGF10, HDX, HNRPLL, SPRY2, EPC2, SLC1A3, USP54, BC005764, MAP3K9, SNPH, ATF6B, GNPAT, OLIG1, PPP1R14C, FOSL1, CCNO, FAM164C, FOXJ2, NOS1AP, RUNX1T1, ARHGEF17, ZCCHC14, PITPNM1, ARHGAP33, PSD, STXBP5, BTG3, D930015E06RIK, FHOD3, ZFP821, PIAS2, 6330403A02RIK, SRGAP1, PEG3, CDK5R2, GPR64, KRT20, A930038C07RIK, NPAS1, EPHB6, MACF1, NR1D2, VWA5B1, SPEG, PLCH2, PLCH1, S…	2765	379	16021	1.2536292804420122	1.0	0.7411194130207213	33.442326274142296
UP_SEQ_FEATURE	compositionally biased region:Ser-rich	80	0.2721180992550767	0.04002565515275813	MEF2C, PRR13, POU6F2, D4BWG0951E, FAM199X, NAP1L3, CPEB1, ZIC1, 2810030E01RIK, RGL1, KLHL1, PNN, ARHGAP22, PUM1, SLCO1C1, ETL4, NEURL1B, RAPGEF2, JPH1, FAM149A, BCR, PRG4, DTL, PAPD7, CCDC136, MARK3, UBN2, GRM1, FOXN3, ZCCHC14, ARHGAP26, MAST3, RAB11FIP5, SMTN, NCOA6, FHOD3, D930015E06RIK, CLIP1, CELF1, PIAS2, PIAS1, KSR1, KDM6B, ABLIM2, PACS2, CAMTA2, ARPP21, SHROOM3, CRTC1, SETD1B, RIMS2, MYCBP…	2765	380	16021	1.2198343961168745	1.0	0.8812889727046402	54.621150644495756
SP_PIR_KEYWORDS	cleavage on pair of basic residues	77	0.2619136705330113	3.3624738465061833E-10	PDGFB, SORL1, CDH20, BDNF, RESP18, ITIH3, APLN, LOXL1, CDH24, AVP, ADAM11, PMCH, MMP17, MMP16, MMP15, GAL, GRP, INHBA, CHGA, TNFSF13B, ADM, SORT1, CARTPT, ADAMTS1, GNAS, EDA, CHGB, ADAMTS4, VIP, HCRT, CCK, ADAMTS19, C3, ADAMTS13, ADAMTS16, OXT, ADAMTS15, 1500015O10RIK, TAC1, POMC, TRH, TAC2, CDH6, ADCYAP1, CALCA, PCSK2, PCSK1, CDH7, PRRG4, CDH9, LEFTY2, SCG3, SCG5, FIGF, PCSK5, SCG2, BMP4, PLAT, …	2817	238	17854	2.050512643822172	1.997309139190051E-7	1.174887842569916E-8	4.959288424366548E-7
SP_PIR_KEYWORDS	repressor	77	0.2619136705330113	0.02844969098944273	EIF2C2, ZEB2, CPEB1, GM10094, NR2E1, CBX6, YBX1, PCGF5, SAP30, SIN3B, ZFP238, ANP32A, ZFP503, HSF4, SCRT1, ZFP423, TBL1XR1, SATB1, CTBP2, RCOR1, ZHX2, TLE4, HDAC11, RBBP7, FOXN3, NRIP1, HNRPDL, KDM2B, MSX1, NAB2, CELF2, ZFPM2, GM6382, ZFPM1, CUX1, GLIS3, IRX3, DPF3, 2410016O06RIK, NFIX, TCF7L2, MED12L, HEXIM2, GM11560, NR1D2, BCL11B, BCL11A, GATAD2B, BCL6, ZBTB7B, MAF, ERF, DNMT3A, KLF8, BHLHE22,…	2817	391	17854	1.2481381310221917	0.9999999641586154	0.2043443879030662	34.66791516590403
KEGG_PATHWAY	mmu05200:Pathways in cancer	73	0.2483077655702575	1.2272848345902502E-4	FGF5, E2F3, PTGS2, PDGFB, STAT5B, FGF10, FGF12, PTEN, SHH, GLI1, WNT2, WNT3, SLC2A1, RARA, HHIP, FGF1, PRKCA, AR, RET, BCR, CTBP2, RUNX1T1, LEF1, CDK6, CTNNA1, DAPK2, STK4, PRKCC, CTNNA2, PRKCB, JUP, CCDC6, MAPK1, WNT9B, PIAS2, WNT9A, PIAS1, DCC, FGFR1, XIAP, GRB2, GM12791, KIT, ZBTB16, TCF7L2, PTK2, BCL2, FIGF, FN1, TRAF3, FZD9, BMP4, MAP2K1, VHL, FLT3, CBL, SMAD4, FZD1, SMAD3, ITGA3, SMAD2, HGF…	847	323	5738	1.5310785471213277	0.022090310043902606	0.001395148047902195	0.15134417952085144
SP_PIR_KEYWORDS	actin-binding	73	0.2483077655702575	1.0928137012999363E-9	ENAH, WASF1, CAPZA2, KLHL2, KLHL1, ACTR3, ACTR2, SNTB1, PLS1, SNTB2, CAP1, LMOD2, PLS3, PARVG, TWF2, ACTN4, CLMN, ERMN, VIL1, ENC1, ACTN1, ACTN2, TMSB10, SPIRE2, MYH9, NEXN, FLNB, ARPC1A, FHOD3, TMSB4X, WASL, ADD3, DST, ADD2, ADD1, SHROOM2, SHROOM3, ACTR3B, SSH2, ANLN, ARPC5, TPM1, CAPZB, PFN2, SYN1, GM16372, MACF1, ARPC3, SPNB3, ARPC2, DMD, SPNB1, WIPF3, MYO5B, SYNPO, INF2, PHACTR1, PHACTR3, MYO…	2817	226	17854	2.0472133475328365	6.491311443923564E-7	3.4164807538594744E-8	1.6117831735940058E-6
SP_PIR_KEYWORDS	transmembrane protein	72	0.244906289329569	0.0426284636578965	OPRM1, GLRA1, PLXNA1, LDLR, ATP1B2, PLXNA2, TACR1, SORL1, H2-D1, GRIK5, AQP1, KCNJ12, MOG, KCNJ11, SLC1A2, HTR1A, GRIN2D, CHRNA7, PTPRK, RET, PTPRM, PTGER4, PTPRG, PTPRN, SSTR4, ACVR2A, ACVR2B, SSTR1, HTR7, CHRM1, PMP22, FGFR1, IL1R1, DRD2, OPRK1, IL4RA, ITGB4, ST8SIA3, BDKRB2, EPHB3, KCNJ2, APLP2, GJC1, CD68, MAN1A, MAS1, ADRA2B, HTR3A, GABRD, H2-Q2, MAG, PTPRD, PTPRE, FLT3, SLC6A11, GRIN1, NPR1…	2817	370	17854	1.2333304550556945	0.9999999999942214	0.2498789123985442	47.403383345110065
KEGG_PATHWAY	mmu04010:MAPK signaling pathway	69	0.23470186060750367	1.343546462331215E-6	MEF2C, FGF5, PDGFB, FGF10, FGF12, BDNF, RAPGEF2, FGF1, PRKCA, CACNG8, CACNG6, RELB, CACNG5, CACNG4, CACNG3, FLNB, STK4, PRKCC, PRKCB, MAP4K3, MAPK1, RASGRF2, ARRB2, RRAS2, STMN1, MAPK7, GADD45B, FGFR1, IL1R1, GRB2, MAP4K2, CACNB1, GM12791, CACNB3, GNG12, HSPA1B, CACNB4, SRF, HSPA2, MAP3K3, RASGRP1, RASGRP2, PPP3CB, PPP3CA, CACNA2D1, MAP2K1, NTF3, NLK, PTPN5, CACNA1I, TAOK3, NR4A1, MAPK10, CACNA2D…	847	265	5738	1.7639259539774117	2.4449572645279805E-4	3.0565235424329096E-5	0.0016579519215742522
KEGG_PATHWAY	mmu04810:Regulation of actin cytoskeleton	67	0.22789890812612673	1.518320804874039E-9	FGF5, ENAH, PDGFB, WASF1, PIP5K1B, PIP5K1C, FGF10, PIP5K1A, FGF12, PAK6, PAK7, PAK4, FGF1, ACTN4, ROCK2, BAIAP2, ACTN1, ACTN2, MYH9, PPP1CC, PPP1CB, ARPC1A, MAPK1, CHRM3, CHRM2, CHRM1, RRAS2, TMSB4X, WASL, 6720456B07RIK, FGFR1, MYL2, SSH2, ITGA11, ITGB4, ABI2, GNG12, ARPC5, BDKRB2, PFN2, PTK2, EZR, GM16372, ARPC3, ITGB8, ARPC2, PPP1R12A, FGD3, FN1, ACTB, GIT1, VAV3, MAP2K1, ITGA3, ITGA4, NCKAP1, …	847	217	5738	2.0916653518245476	2.7633434807050605E-7	6.908359417856502E-8	1.8736397433549712E-6
SP_PIR_KEYWORDS	palmitate	67	0.22789890812612673	4.134361770057477E-9	GPRIN1, OPRM1, SYT1, CCKAR, TACR3, TACR1, KCNIP2, RHOV, ADORA1, RHOU, SHH, EDNRB, S1PR1, GALR1, S1PR5, DLG4, GABRG1, CCKBR, HTR4, RFTN1, NTSR1, ZDHHC15, SSTR4, GNAL, SSTR5, GNAQ, SSTR1, HTR7, GNAS, AKAP7, CPD, AKAP2, GAP43, PALM, OPRK1, NPY2R, DRD5, KCNA2, KCNA6, KCNA5, BDKRB2, RAB40B, HRH1, GAD2, PALM2, SFTPC, GRID2IP, ADRA2B, SCARB2, MC3R, MYOC, MAG, GRIA3, NPY1R, RGS17, GRIA4, RGS16, NRAS, CDC…	2817	206	17854	2.0613714927744518	2.4558078642877845E-6	1.1694336843337538E-7	6.097740523625106E-6
SP_PIR_KEYWORDS	voltage-gated channel	65	0.22109595564474982	4.0257923246252195E-18	KCNH1, KCNC2, KCNC1, KCNC4, KCNC3, KCNAB3, KCNAB2, SCN3B, KCNAB1, KCNJ10, KCNIP2, KCNK13, KCNJ12, KCNJ11, KCNIP1, KCNIP4, KCNJ13, KCNQ5, NALCN, KCNG3, KCNQ1, KCNG4, KCNG1, CACNG8, CACNG6, CACNG5, CACNG4, CACNG3, CLIC4, KCNH7, KCNH3, KCNH5, SCN1A, SCN1B, CLCN2, KCNA2, CACNB1, KCNA6, CACNB3, KCNA5, CACNB4, KCNJ2, KCNS3, SCN9A, KCNE2, SCN5A, HCN3, KCNE4, HCN1, HCN2, CACNA2D1, KCNB1, CACNA2D2, KCNK2,…	2817	135	17854	3.0516046753178454	2.3913206408273804E-15	2.9891508010342256E-16	5.937612432837917E-15
SP_PIR_KEYWORDS	leucine-rich repeat	65	0.22109595564474982	6.87403367231839E-4	PXDN, LRRC8B, LRRC8C, LRRC8D, LRTM2, LGR5, OGN, LRRC57, LRRC58, ANP32A, LGI2, LRRC55, LGI1, FBXL16, ISLR2, LRRC3, FBXL21, LRRC1, CCDC136, LRRC27, TBCEL, SLIT1, SLIT3, 3110047P20RIK, PRELP, SLITRK2, DNAHC3, AMIGO2, SLITRK4, KDM2B, SLITRK3, BGN, FBXL7, LRCH4, EPYC, SLITRK6, SLITRK5, ZER1, FMOD, PODN, LRRC33, RTN4RL1, LUM, NLRX1, LRIG2, DCN, 4930451C15RIK, IGSF10, LINGO1, LINGO4, LINGO3, LRRTM4, RTN…	2817	275	17854	1.498060476974215	0.33532561438174	0.008301230541395532	1.0090693374891657
SP_PIR_KEYWORDS	extracellular matrix	64	0.21769447940406136	2.5161863044161336E-7	CTHRC1, PXDN, LTBP4, NPNT, WNT2, OGN, WNT3, CTGF, EMID2, COL12A1, CRTAC1, SPARCL1, MMP17, PRELP, BGN, WNT9B, ADAMTS1, RELN, WNT9A, MFAP4, EPYC, CHL1, ADAMTS4, FMOD, PODN, ADAMTS19, SPOCK3, ADAMTS16, LUM, ADAMTS15, COL2A1, DCN, TIMP2, SMOC2, LGALS3BP, COL27A1, TNR, COL6A3, COL6A2, VWC2, COL6A1, FBN2, FN1, SPP1, BMP4, HAPLN2, COL18A1, HAPLN1, HAPLN4, COL15A1, NID2, SPARC, EMILIN2, COL16A1, NTN1, CO…	2817	213	17854	1.9043600140661743	1.494503165014871E-4	5.748502143188006E-6	3.7110988445610005E-4
UP_SEQ_FEATURE	repeat:LRR 2	63	0.2142930031633729	0.006708898618992428	PXDN, LRRC8B, LRRC8C, LRRC8D, LRTM2, LGR5, OGN, LRRC57, LRRC58, ANP32A, LGI2, LRRC55, LGI1, FBXL16, ISLR2, LRRC3, FBXL21, LRRC1, LRRC27, CCDC136, TBCEL, SLIT1, SLIT3, 3110047P20RIK, PRELP, SLITRK2, DNAHC3, AMIGO2, SLITRK4, KDM2B, SLITRK3, BGN, FBXL7, LRCH4, EPYC, SLITRK6, SLITRK5, ZER1, FMOD, PODN, LRRC33, RTN4RL1, LUM, NLRX1, LRIG2, DCN, 4930451C15RIK, IGSF10, LINGO1, LINGO4, LINGO3, LRRTM4, RTN…	2765	266	16021	1.3723136956314836	1.0	0.46974115635046754	12.208490797196724
UP_SEQ_FEATURE	repeat:LRR 1	63	0.2142930031633729	0.006708898618992428	PXDN, LRRC8B, LRRC8C, LRRC8D, LRTM2, LGR5, OGN, LRRC57, LRRC58, ANP32A, LGI2, LRRC55, LGI1, FBXL16, ISLR2, LRRC3, FBXL21, LRRC1, LRRC27, CCDC136, TBCEL, SLIT1, SLIT3, 3110047P20RIK, PRELP, SLITRK2, DNAHC3, AMIGO2, SLITRK4, KDM2B, SLITRK3, BGN, FBXL7, LRCH4, EPYC, SLITRK6, SLITRK5, ZER1, FMOD, PODN, LRRC33, RTN4RL1, LUM, NLRX1, LRIG2, DCN, 4930451C15RIK, IGSF10, LINGO1, LINGO4, LINGO3, LRRTM4, RTN…	2765	266	16021	1.3723136956314836	1.0	0.46974115635046754	12.208490797196724
KEGG_PATHWAY	mmu04020:Calcium signaling pathway	62	0.21089152692268445	7.703279734095411E-10	CCKAR, ADCY1, ADCY2, ADCY7, TACR3, ADCY8, GNA11, TACR1, ITPKB, ITPKA, EDNRA, EDNRB, PLCB4, GRIN2D, CHRNA7, PLCB1, PRKCA, CCKBR, TRHR2, HTR4, NTSR1, GRM1, PRKCC, PRKCB, GNAL, PLCE1, CHRM3, GNAQ, CHRM2, CHRM1, HTR7, HTR6, RYR1, RYR2, GNAS, GM7308, DRD5, OXTR, BDKRB2, HRH1, PTK2B, PDE1A, PPP3CB, CAMK2B, PPP3CA, CAMK2A, TRPC1, SLC8A1, NOS1, CACNA1I, GRIN1, P2RX4, ADCY9, ATP2A1, ADRA1B, CACNA1G, CACNA…	847	191	5738	2.199051781155541	1.401996905237013E-7	4.673323239501315E-8	9.506009535087401E-7
PANTHER_PATHWAY	P00034:Integrin signalling pathway	62	0.21089152692268445	0.06753948913290067	ENAH, TLN2, COL12A1, RHOF, RAPGEF1, RAP2B, RAP2A, ACTN4, COL22A1, ACTN1, ACTN2, FLNB, ARHGAP26, ELMO1, ARPC1A, RND2, RND3, MAPK1, RND1, MAPK6, NAV2, RRAS2, MAPK7, FAM98B, GRB2, ITGA11, ITGB4, GM12791, COL2A1, ARPC5, ARF5, ITGBL1, PTK2, GM16372, MAP3K3, ARPC3, PTK2B, ITGB8, ARPC2, COL27A1, COL6A3, COL6A2, COL6A1, FN1, COL18A1, MAP2K1, COL15A1, ITGA3, MAPK10, ITGA4, COL5A3, COL16A1, COL5A1, NRAS, C…	659	228	2921	1.2053217261667066	0.9998791273925992	0.31330535274413684	55.65771202410996
UP_SEQ_FEATURE	domain:PH	61	0.207490050681996	8.060159097667072E-6	ITSN2, ARHGAP15, MCF2L, ARHGAP12, PLEKHB2, ARHGAP21, ARHGAP22, GAB2, GAB1, AGAP2, AGAP3, NET1, IRS4, ARHGEF3, ARHGEF2, OSBP2, BCR, ROCK2, PSD2, ARHGAP26, ELMO1, GRB10, KIF1A, PSD, SBF1, DOK6, ACAP2, SPATA13, PHLDB1, RALGPS2, CYTH4, ANLN, CYTH3, PLCL2, DAPP1, OSBPL1A, PLCH2, PLEKHG5, PLCH1, PLEKHO1, IQSEC3, RASA4, PHLDA3, IQSEC2, PHLDA1, CNKSR2, 4933407C03RIK, NGEF, OSBPL5, VAV3, ABR, OSBPL9, TECP…	2765	202	16021	1.7497377043310116	0.04600390363956819	0.011704883427188228	0.015589362540091578
UP_SEQ_FEATURE	compositionally biased region:Poly-Ala	61	0.207490050681996	0.02508695375813086	PRR18, KCNC3, ZIC1, ZIC3, 2810030E01RIK, ZIC2, RBM4B, DIP2A, MAZ, GRIN2D, SNPH, PRRT1, SNTB1, STK39, IRS4, TBL1XR1, ICOSL, AR, BCR, PTGER4, OLFML2B, BARHL2, SIX3, CECR6, TBR1, ZDBF2, MAPK1, HAS1, HIPK2, 6330403A02RIK, IRX3, CALY, IRX5, CLCN2, TH, IRX1, OXTR, OTP, RGMA, LINGO3, HRH3, SLC29A4, LHX2, BAI2, NKX2-1, POU3F3, FBXO41, PABPC1, NKX2-4, NLK, SMAD4, NADK, KCNJ4, NOTCH2, SAMD5, LASS1, ID4, TB…	2765	273	16021	1.2946777152925437	1.0	0.7767640500836739	38.825491165885495
PANTHER_PATHWAY	P00027:Heterotrimeric G-protein signaling pathway-Gq alpha and Go alpha mediated pathway	60	0.2040885744413075	3.730645628780345E-7	OPRM1, GNA11, ADORA1, GNG8, PLCB4, GNG4, PLCB1, RHOF, GNG7, NET1, PRKCA, RAP2B, ARHGEF3, RAP2A, ARHGEF2, SIPA1L3, PRKCH, GRM1, PRKCD, PRKCC, PRKCB, SSTR4, PRKCQ, SSTR5, GRM4, CHRM3, GNAQ, CHRM2, SSTR1, GRM8, GRM7, CHRM1, RAP1GAP, DRD2, OPRK1, DRD5, AKAP13, GNG11, BDKRB2, GNG12, RGS11, RGS12, RASGRP1, PLEKHG5, RASGRP2, GPSM2, RGS17, RGNEF, RGS16, RGS14, KCNJ5, KCNJ6, RGS2, KCNJ9, RGS4, RGS5, RGS6,…	659	145	2921	1.8341269425985034	4.81241795866616E-5	4.81241795866616E-5	4.3385359760339526E-4
SP_PIR_KEYWORDS	neurogenesis	60	0.2040885744413075	3.1927959889296E-13	MEF2C, NRP2, ENAH, NRP1, TTLL7, ZIC1, ZIC2, BZW2, DAB1, SERPINE2, FRMD7, SEMA3E, ROBO2, ATOH8, ROBO3, ISLR2, ZFP423, MDGA1, EFNB1, SLIT1, SLIT3, NAV1, SEMA4G, SEMA4F, CAMK1, EFNA5, STMN1, NGFR, CHL1, GAP43, UNCX, DPF3, BEX1, DPF1, OTP, ARX, LHX1, POU3F3, ACTL6B, LHX6, NDRG2, FBXO45, NGEF, NTNG1, NTNG2, GDPD5, RFNG, GAS7, NTRK3, FEZF1, SEMA6A, FEZF2, MEF2D, PPP1R9B, NTRK1, ITGA8, NEUROD2, CYFIP1, …	2817	144	17854	2.640811738255828	1.8966428427802384E-10	1.724220766163853E-11	4.709344025854989E-10
UP_SEQ_FEATURE	repeat:LRR 3	60	0.2040885744413075	0.0038528593775011824	PXDN, LRRC8B, LRRC8C, LRRC8D, LRTM2, LGR5, OGN, LRRC57, LRRC58, ANP32A, LGI2, LRRC55, LGI1, FBXL16, ISLR2, LRRC3, FBXL21, LRRC1, LRRC27, TBCEL, SLIT1, SLIT3, PRELP, 3110047P20RIK, SLITRK2, DNAHC3, AMIGO2, SLITRK4, KDM2B, SLITRK3, BGN, FBXL7, LRCH4, EPYC, SLITRK6, SLITRK5, ZER1, FMOD, PODN, RTN4RL1, LRRC33, LUM, NLRX1, LRIG2, DCN, 4930451C15RIK, IGSF10, LINGO1, LINGO4, LINGO3, LRRTM4, RTN4RL2, LRF…	2765	245	16021	1.4189910322175887	0.9999999998399824	0.3942201286982042	7.194900536535198
UP_SEQ_FEATURE	lipid moiety-binding region:S-palmitoyl cysteine	59	0.20068709820061909	2.2303740108212827E-7	OPRM1, GPRIN1, SYT1, CCKAR, TACR3, TACR1, KCNIP2, RHOV, RHOU, ADORA1, EDNRB, S1PR1, GALR1, S1PR5, DLG4, CCKBR, HTR4, RFTN1, NTSR1, SSTR4, GNAL, GNAQ, SSTR1, HTR7, GNAS, AKAP7, CPD, AKAP2, GAP43, PALM, OPRK1, DRD5, KCNA2, NPY2R, KCNA6, KCNA5, BDKRB2, RAB40B, HRH1, GAD2, PALM2, SFTPC, ADRA2B, MC3R, MAG, GRIA3, NPY1R, GRIA4, RGS16, NRAS, CDC42SE2, GOLGA7B, GRIA1, FYN, RGS4, ADRA1B, MC4R, OPN3, ADRA1…	2765	175	16021	1.9534776543528805	0.0013023588736156277	4.343082208623228E-4	4.314134233629474E-4
KEGG_PATHWAY	mmu04510:Focal adhesion	58	0.1972856219599306	1.755157038756946E-7	PDGFB, TLN2, PIP5K1C, PTEN, PAK6, PAK7, PAK4, ZYX, SHC3, RAPGEF1, PRKCA, PARVG, ACTN4, ROCK2, ACTN1, ACTN2, PPP1CC, FLNB, PPP1CB, PRKCC, PRKCB, MAPK1, CCND2, RELN, MYL2, XIAP, GRB2, ITGA11, ITGB4, GM12791, COL2A1, PTK2, ITGB8, TNR, BCL2, PPP1R12A, COL6A2, COL6A1, FIGF, THBS2, FN1, SPP1, THBS4, ACTB, VAV3, MAP2K1, ITGA3, MAPK10, ITGA4, HGF, COL5A3, CAPN2, COL5A1, LAMA5, FYN, ITGA8, ITGA7, CRK, DIA…	847	198	5738	1.9844489761845134	3.194335070610954E-5	6.388751772945511E-6	2.165898492334506E-4
PANTHER_PATHWAY	P00026:Heterotrimeric G-protein signaling pathway-Gi alpha and Gs alpha mediated pathway	58	0.1972856219599306	2.7518030668037107E-4	OPRM1, ADCY1, ADCY2, ADCY7, ADCY8, ADORA1, PRKAR2A, HTR1A, GNG7, RAP2B, RAP2A, RET, HTR4, GRM1, SSTR4, GNAL, SSTR5, GRM4, CHRM3, ARRB2, CHRM2, GRM8, SSTR1, GRM7, CHRM1, HTR7, HTR6, GPR50, GNAS, GNAI1, DRD2, OPRK1, DRD5, GNG11, GNG12, RGS11, HRH1, RGS12, HRH3, GPSM2, ADRA2B, RGS17, RGS16, RGS14, KCNJ5, KCNJ6, ADCY9, PYGM, KCNJ9, RGS2, PYGL, RGS4, RGS5, RGS6, ADRA1B, HTR2C, ADRA1D, OPRD1	659	167	2921	1.5394219148955504	0.034880300756729876	0.011764630686850852	0.31955259811081715
SP_PIR_KEYWORDS	egf-like domain	55	0.18708119323786523	5.828577172647028E-4	LTBP1, LDLR, NPNT, LTBP4, NELL1, NELL2, SORL1, DLK1, EDIL3, C1RA, CCBE1, CNTNAP3, CNTNAP2, HHIP, ODZ1, NRG1, MATN2, ADAM11, CNTNAP4, SCUBE2, CRTAC1, SCUBE1, LRP1B, MFGE8, SLIT1, SLIT3, THBD, RELN, NCAN, PAMR1, ITGBL1, FAT3, CRB1, FAT4, TNR, DNER, HEG1, FBN2, THBS2, THBS4, PLAT, CUBN, BMP1, CELSR2, NID2, CELSR1, GAS6, NOTCH3, NOTCH2, CLEC18A, TMEM8B, FBLN2, FBLN5, MEGF6, LRP4	2817	222	17854	1.5702123849088705	0.2927127638945106	0.007341396371791209	0.8562167277930688
SP_PIR_KEYWORDS	isopeptide bond	55	0.18708119323786523	0.05446377072087517	MEF2C, THRA, GABRB2, SLC9A4, ZEB2, PIP5K1A, YBX1, TOP1, HTR1A, CUL7, HSF4, PLS3, ARL2, SATB1, AR, LIG1, RIMBP2, LEF1, H2AFJ, RBBP7, HIST2H4, HUNK, MSX1, EVPL, GRM8, FANCD2, HIPK2, GNAS, GM7308, GM6382, KCNH5, HIST1H4K, ATG12, HIST2H3C1, KCNA5, TPM1, TCF7L2, SUMO3, SUMO2, GM11560, FN1, KLF8, CEBPB, HIST1H2BE, MAFB, CEBPD, GABRA5, SMAD4, HNRNPA1, MEF2D, HDAC4, HDAC1, SP3, COX6A2, IRF2, HIVEP2, CALM…	2817	277	17854	1.258437362634546	0.9999999999999964	0.29542929392769357	56.21966101560272
SP_PIR_KEYWORDS	cell projection	54	0.18367971699717678	3.634284093170341E-5	GPRIN1, SH3RF1, ENAH, LZTS1, TTLL8, TTLL7, CD2AP, RHOU, ACTR3, ACTR2, CTTN, FRMD7, ANKS1B, ARC, BAIAP2, BASP1, SNTN, CTNNA2, DNAHC3, SPAG4, GNAS, NRGN, THEM4, SEZ6, GAP43, ACTR3B, ABI2, STARD10, ABI1, ARPC5, NPHP4, EZR, GM16372, ARPC3, ARPC2, RASGRP2, PSTPIP1, SLC4A7, GRID2IP, MYOC, SYNPO, NGEF, NOS1, NCDN, EVL, GDPD5, PARK2, WHRN, NCKAP1, PROM1, PPP1R9B, PROM2, CYFIP1, KPTN, DIAP1	2817	196	17854	1.7461693942752818	0.021356685886463	6.166109544577525E-4	0.053588407626514734
SP_PIR_KEYWORDS	cytoplasmic vesicle	54	0.18367971699717678	0.002873571210439543	SYT1, SYT5, SYT2, NSG2, SYT9, ARHGAP21, AP1S1, SPRED2, SNTB2, SV2A, KCNQ1, AP3B1, EPN3, SVOP, ARC, ATG9B, RND2, COPG2, CAPN11, ARRB2, CLIC4, FNBP1L, GNAS, VAMP2, HCRT, NKD2, CALY, AGFG1, 1500015O10RIK, ACSBG1, PCSK2, SLC32A1, PCSK1, SYNPR, GAD2, NPTX1, TRAF7, SLC30A3, CLVS2, MYOF, PHLDA1, ICA1, SYT10, SYT12, ATM, MARCH3, MARCH1, SLC17A7, CORO1A, SLC17A6, RAB37, CADPS2, SLC18A2, ATP8A1	2817	232	17854	1.4752120744739452	0.8190181372541465	0.03006309713049027	4.155500823217107
UP_SEQ_FEATURE	propeptide:Removed in mature form	54	0.18367971699717678	0.005873219572646613	PDGFB, EFNA1, EFNA3, SORL1, GNG8, GPC4, DIRAS1, DIRAS2, GPC3, RASL10A, RASL10B, GNG4, RHOF, RHOG, GNG7, RAP2B, RAP2A, ACTA1, CNTN5, ACTA2, CNTN6, MDGA1, MMP17, RND2, LYPD6B, RND3, RND1, CD59A, LSAMP, RRAS2, SORT1, CNTN4, EFNA5, CAR4, RTN4RL1, GNG11, CNTFR, GNG12, NRN1, PSMB5, RGMA, RGMB, LY6E, FOLR1, RTN4RL2, RAB8B, CUBN, NTNG1, RTN4R, NTNG2, CDH13, NRAS, RAB37, GFRA4	2765	220	16021	1.422216011836265	0.9999999999999989	0.45328710368455216	10.768741944387761
UP_SEQ_FEATURE	repeat:LRR 4	54	0.18367971699717678	0.006459520480790975	PXDN, LRRC8B, LRRC8C, LRRC8D, LRTM2, LGR5, OGN, LRRC57, LRRC58, ANP32A, LGI2, LRRC55, FBXL16, ISLR2, LRRC1, LRRC27, TBCEL, SLIT1, PRELP, 3110047P20RIK, SLIT3, SLITRK2, AMIGO2, DNAHC3, SLITRK4, KDM2B, SLITRK3, BGN, FBXL7, LRCH4, EPYC, SLITRK6, SLITRK5, FMOD, PODN, RTN4RL1, LRRC33, LUM, NLRX1, LRIG2, DCN, 4930451C15RIK, IGSF10, LINGO1, LINGO4, LINGO3, LRRTM4, RTN4RL2, LRFN2, DNALC1, RTN4R, LRGUK, E…	2765	221	16021	1.4157806452668702	1.0	0.47364876917914445	11.781172496267233
SP_PIR_KEYWORDS	sh3 domain	53	0.1802782407564883	2.203476852851425E-4	SH3RF1, ITSN2, CD2AP, MCF2L, ARHGAP12, SLA, CTTN, STAC2, STAC, MAP3K9, DLG4, DLG3, BAIAP2, RIMBP2, MPP6, MPP7, GM6226, ARHGAP26, NCK2, ARHGAP33, FNBP1L, MAP3K10, FCHSD2, SRGAP3, SPATA13, DST, EPS8L2, SH3GL2, SRGAP1, SH3GL1, KALRN, FUT8, GRB2, CACNB1, GM12791, ABI2, CACNB3, ABI1, CACNB4, MACF1, SORBS2, PSTPIP1, NGEF, SASH1, VAV3, AHI1, TRIO, DOCK4, TJP1, EPS8, FYN, SH3RF3, CRK, ABL2, ARHGAP10	2817	204	17854	1.6466237897359866	0.12269533064749427	0.003267174816955487	0.32449740796591797
UP_SEQ_FEATURE	compositionally biased region:Poly-Gly	53	0.1802782407564883	0.0038976252804826302	CTNNAL1, SH3RF1, CCKAR, E2F3, KCNC3, HR, SHH, ZIC2, CAMKK2, ZNRF2, MAZ, GRIN2D, SNTB1, SNTB2, SOX10, AR, MAGI1, LEF1, SOCS7, ARHGEF17, CECR6, PRDM8, CD99L2, ERC2, KSR1, IRX3, IRX5, KCNA5, PVRL1, BAI2, NKX2-1, POU3F3, FBXO41, RNF10, TNRC6A, PPP2R2D, ERF, KIF3B, KAT2B, MEX3B, PTPN14, ZFP609, SHOX2, ELFN2, NOTCH2, FEZF2, GOLGA7B, SP3, NEUROD2, FAM155A, MAFA, GPATCH8, DNAJB6	2765	211	16021	1.4554185271204887	0.9999999998769367	0.39106909869145645	7.27553738724056
SP_PIR_KEYWORDS	potassium transport	51	0.17347528827511138	4.4120643126852895E-14	KCNH1, KCNC2, KCNC1, KCNC4, SLC9A7, KCNAB3, KCNC3, KCNAB2, ATP1B2, KCNAB1, KCNJ10, KCNIP2, KCNK13, KCNJ12, KCNIP1, KCNJ11, KCNIP4, KCNJ13, KCNQ5, SLC24A4, KCNG3, KCNG4, KCNQ1, KCNG1, KCNG2, SLC12A8, TMEM38A, KCNT1, KCNH7, KCNH3, KCNH5, SCN1A, KCNA2, KCNA6, KCNA5, KCNJ2, KCNS3, KCNE2, HCN3, KCNE4, HCN1, HCN2, KCNB1, ATP1A1, KCNK2, KCNK3, KCNV1, KCNJ5, KCNJ4, KCNJ6, KCNJ9	2817	107	17854	3.020891184696386	2.6181057322105517E-11	2.618127936671044E-12	6.500355809180292E-11
SP_PIR_KEYWORDS	potassium	51	0.17347528827511138	4.493251168029979E-12	KCNH1, KCNC2, KCNC1, KCNC4, SLC9A7, KCNAB3, KCNC3, KCNAB2, ATP1B2, KCNAB1, KCNJ10, KCNIP2, KCNK13, KCNJ12, KCNIP1, KCNJ11, KCNIP4, KCNJ13, KCNQ5, SLC24A4, KCNG3, KCNG4, KCNQ1, KCNG1, KCNG2, SLC12A8, TMEM38A, KCNT1, KCNH7, KCNH3, KCNH5, SCN1A, KCNA2, KCNA6, KCNA5, KCNJ2, KCNS3, KCNE2, HCN3, KCNE4, HCN1, HCN2, KCNB1, ATP1A1, KCNK2, KCNK3, KCNV1, KCNJ5, KCNJ4, KCNJ6, KCNJ9	2817	118	17854	2.739282684428079	2.6690170074061825E-9	2.224180839505152E-10	6.627132176362238E-9
KEGG_PATHWAY	mmu04360:Axon guidance	50	0.17007381203442293	8.34415693112796E-11	NRP1, PLXNA4, PLXNA1, PLXNA2, EFNA1, EFNA3, PAK6, PAK7, UNC5B, UNC5A, SEMA3F, PAK4, SEMA3E, ROBO2, ROBO3, ROCK2, EFNB1, GM6226, SLIT1, SLIT3, MAPK1, NCK2, RND1, SEMA4G, SEMA4F, SRGAP3, EFNA5, SRGAP1, DCC, ABLIM2, PLXNC1, GNAI1, EPHB3, EPHB2, EPHB6, PTK2, PPP3CB, PPP3CA, NGEF, NTNG1, DPYSL5, NTN1, EPHA3, EPHA5, EPHA4, NRAS, SEMA6A, EPHA7, EPHA6, EPHA8, FYN	847	131	5738	2.585686346963238	1.5186368718111964E-8	7.593184414567133E-9	1.0296866692627304E-7
UP_SEQ_FEATURE	repeat:LRR 5	48	0.16327085955304604	0.018563896827484334	FMOD, PXDN, PODN, LRRC33, RTN4RL1, LRRC8B, LUM, LRRC8C, LRRC8D, LRTM2, LRIG2, DCN, 4930451C15RIK, LGR5, IGSF10, OGN, LINGO1, LINGO4, LINGO3, LRRTM4, LRRC57, LRRC58, RTN4RL2, LRRC55, FBXL16, LRFN2, ISLR2, LRRC1, RTN4R, LRGUK, TBCEL, SLIT1, SLIT3, 3110047P20RIK, PRELP, SLITRK2, AMIGO2, ELFN2, DNAHC3, SLITRK4, SLITRK3, BGN, ERBB2IP, FBXL7, LRCH4, EPYC, SLITRK6, SLITRK5	2765	203	16021	1.3700603069687063	1.0	0.7200431020934537	30.40311905597064
SP_PIR_KEYWORDS	ATP	46	0.1564679070716691	9.989425490859494E-6	FGFR1, CDK18, NEK1, HK1, PRKG2, KIT, EPHB3, DDR2, HSPA2, CAMK2B, SIK1, CAMK2A, GM12183, PRKCA, TYRO3, RET, KIF3B, LTK, PFKL, MAP2K1, FLT3, PIM1, NPR1, PRKCH, CDK6, MARK3, DDX5, ALK, PRKCD, PRKCC, PRKCB, EPHA5, ACVR2A, EPHA4, PRKCQ, MAPK1, KIF1A, ACVR2B, PLK2, MAPK6, GCK, RPS6KA1, FYN, MAPK14, EIF4A1, MERTK, ACVR1	2817	151	17854	1.9307656682347245	0.005916178463102106	1.977720531625149E-4	0.01473232080039244
SP_PIR_KEYWORDS	methylation	46	0.1564679070716691	0.03995602549318085	MBP, GNG8, DIRAS1, DIRAS2, RASL10A, RASL10B, RARA, GNG4, RHOF, CRYBB3, RHOG, GNG7, RAP2B, RAP2A, ACTA1, ACTA2, HMGA1, HIST2H4, RND2, HNRPDL, RND3, RND1, FAM120A, RRAS2, RAB15, GM7308, RAB3B, ARPP21, HIST1H4K, RAB3D, MYL2, RAB6, HIST2H3C1, GNG11, GNG12, PABPC1, ACTB, GM12183, RAB8B, HIST1H2BE, ELAVL1, GM6506, ELAVL4, DDX5, HNRNPA1, NRAS, RAB37, CIRBP, CALM2	2817	221	17854	1.319210931689789	0.9999999999697358	0.24545486968495023	45.19589603165425
UP_SEQ_FEATURE	compositionally biased region:Gly-rich	46	0.1564679070716691	0.010698852895210435	JPH3, FAM98B, ONECUT3, SRF, HNRPLL, FOXO6, MYCBP2, YBX2, CITED2, KRT9, PLCL2, BC024479, BCL11B, DNAJA1, POU4F1, ZFP503, PPP1R14C, JPH1, AGAP3, TWIST1, IRS4, MAF, HCN1, PURG, SSBP3, BHLHE22, CACNG8, SOX12, SIX3, TRIO, PPP1R10, CSRP1, GM6506, ALK, CSTF2T, CECR6, DDX4, HNRNPA1, ZCCHC14, PURA, TNKS1BP1, PRDM8, HNRPDL, CIRBP, RAPGEFL1, ADRA1D	2765	187	16021	1.4253145216659737	1.0	0.5772447274248242	18.784135125161683
SP_PIR_KEYWORDS	postsynaptic cell membrane	45	0.15306643083098065	7.958361178090165E-10	LZTS1, GLRA1, GABRB3, GABRB2, GLRA3, GRIK4, GRIK5, CPEB1, GABBR2, GRIN3A, GRIN2B, HOMER3, GRIN2D, DLG4, CHRNA5, GRID2IP, CHRNA4, CHRNA7, CHRNA6, HTR3A, GABRQ, SYNPO, GABRD, GABRG1, ANKS1B, GABRE, GABRA2, ARC, GABRA4, GABRA3, GABRA5, GRIN1, NLGN1, LIN7B, LIN7C, GRIA3, PARK2, GRIA4, CAMK2N1, CHRM3, CHRM2, GRIA1, CHRM1, CHRNB4, CHRNB3	2817	110	17854	2.592796979378449	4.727265102699718E-7	2.6262589769565636E-8	1.173772934404127E-6
UP_SEQ_FEATURE	domain:EF-hand 2	45	0.15306643083098065	7.819932638400506E-4	MYL2, CABP1, CABP7, KCNIP2, KCNIP1, NECAB2, CALB2, KCNIP4, NECAB1, SMOC2, EFHD1, CGREF1, DGKB, MACF1, PVALB, PLCH2, SLC25A23, RASGRP1, DGKG, PLCH1, RASGRP2, PLS1, EFCAB2, CALN1, CIB2, PLS3, GPD2, HPCAL1, ACTN4, HPCAL4, ACTN1, ACTN2, CAPN2, P4HTM, EPS15, SLC25A13, RAB11FIP3, CAPN11, S100B, HPCA, GM7308, RCN3, DST, CALM2, RCN1, RCN2	2765	160	16021	1.6296225135623872	0.989652125152778	0.1876073937315471	1.5017859702590175
UP_SEQ_FEATURE	repeat:LRR 6	45	0.15306643083098065	0.014117170142045632	FMOD, PXDN, PODN, LRRC33, RTN4RL1, LRRC8B, LUM, LRRC8C, LRRC8D, LRTM2, LRIG2, DCN, 4930451C15RIK, LGR5, IGSF10, OGN, LINGO1, LINGO4, LINGO3, LRRTM4, LRRC57, LRRC58, RTN4RL2, LRRC55, FBXL16, LRFN2, LRRC1, RTN4R, LRGUK, TBCEL, SLIT1, SLIT3, PRELP, SLITRK2, AMIGO2, DNAHC3, SLITRK4, SLITRK3, BGN, ERBB2IP, FBXL7, LRCH4, EPYC, SLITRK6, SLITRK5	2765	185	16021	1.4094032549728752	1.0	0.6506128690541579	24.04353280959001
PANTHER_PATHWAY	P00012:Cadherin signaling pathway	44	0.1496649545902922	0.0757848925862859	2610005L07RIK, PCDH20, TCF7L2, PCDHB10, CDH6, WNT2, CDH7, ACTR2, PCDH1, CDH20, WNT3, CDH9, FAT3, FAT4, CDH24, FZD9, PCDHB9, PCDHB6, CDHR1, CDHR2, PCDH10, FZD1, LEF1, PCDHB2, PCDH9, CELSR2, PCDH8, PCDH7, CELSR1, FZD5, CTNNA1, PCDH19, PCDH18, CTNNA2, CDH13, WNT7B, FZD10, FYN, CDH18, CDH19, WNT9B, WNT9A, PTPN1, CDH11	659	156	2921	1.250184817711373	0.9999615651520876	0.33413067772021776	60.00932498049255
SP_PIR_KEYWORDS	microtubule	44	0.1496649545902922	0.08058814168255218	KIFC2, KIF22, SHROOM2, SHROOM3, TTLL8, KLC4, HOOK3, SPRY2, DYNLL1, DYNLL2, STARD9, TEKT2, SNTB2, CLASP2, TUBA1A, DYNC1H1, TUBB3, TUBB4, KIF13B, KIF3B, ARHGEF2, DNALC4, KIF5B, KIF5C, MTAP1S, MID1IP1, MID1, EML5, EML4, EML2, RASSF3, DNAHC3, KIF1A, TUBA8, NAV1, TPPP, MTAP1B, TUBD1, CLIP1, STMN1, HAUS8, DYNLRB2, MAPRE3, DNM1	2817	221	17854	1.2618539346597983	1.0	0.3840249720475555	71.03903185447203
SP_PIR_KEYWORDS	ank repeat	44	0.1496649545902922	0.0852755610615944	CAMTA2, ANKRD34B, ABTB2, PPP1R12B, NFKBIB, ANKRD34C, ASB16, ANKRD55, ASB18, CTTNBP2, ANK1, OSBPL1A, ANKS6, MTPN, ANKRD12, PPP1R12A, TNKS, AGAP2, AGAP3, GIT1, TRPC1, ANKS1B, 6330439K17RIK, TRPC3, EHMT1, NUDT12, TRPC6, GM1337, TRPC7, ANKRD33B, KANK4, TNKS2, NOTCH3, FEM1C, ANKRD44, NOTCH2, ANKRD26, ANKRD46, ANKRD49, ACAP2, DGKZ, ASB2, ASB4, BTBD11	2817	222	17854	1.2561699079270965	1.0	0.39031318746998844	73.14203326571631
KEGG_PATHWAY	mmu04310:Wnt signaling pathway	43	0.14626347834960374	1.340911812863961E-5	NKD1, NKD2, PPP2R5D, TCF7L2, WNT2, PLCB4, WNT3, PPP3CB, FRAT2, CAMK2B, PPP3CA, PLCB1, FOSL1, CAMK2A, PRKCA, FZD9, CSNK1A1, TBL1XR1, CTBP2, VANGL1, ROCK2, NLK, SMAD4, FZD1, LEF1, SMAD3, SMAD2, MAPK10, FZD5, PORCN, PRKCC, PRKCB, SFRP5, CTNNBIP1, WNT7B, FZD10, PSEN1, SFRP2, CCND2, PRICKLE2, WNT9B, WNT9A, TBL1X	847	149	5738	1.9550565358985128	0.0024375003216174917	2.2183683254872744E-4	0.016545875353490835
UP_SEQ_FEATURE	domain:EF-hand 1	43	0.14626347834960374	0.003024859687907596	MYL2, CABP1, CABP7, ITSN2, NECAB2, CALB2, NECAB1, SMOC2, EFHD1, CGREF1, DGKB, MACF1, PVALB, PLCH2, SLC25A23, RASGRP1, DGKG, PLCH1, RASGRP2, PLS1, EFCAB2, CALN1, CIB2, PLS3, GPD2, HPCAL1, ACTN4, HPCAL4, ACTN1, ACTN2, CAPN2, P4HTM, EPS15, SLC25A13, RAB11FIP3, CAPN11, S100B, HPCA, GM7308, RCN3, DST, CALM2, RCN1, RCN2	2765	161	16021	1.5475228286141094	0.9999999794630525	0.3648364962770059	5.691379925427221
KEGG_PATHWAY	mmu04144:Endocytosis	41	0.1394605258682268	0.028101919339603022	LDLR, H2-D1, PIP5K1B, VPS37B, PIP5K1C, HSPA1B, PIP5K1A, KIT, HSPA2, NEDD4L, EHD1, IQSEC3, AGAP2, EHD3, AGAP3, IQSEC2, EHD4, H2-Q2, GIT1, EPN3, RET, H2-M3, CBL, PSD2, EPS15, RAB11FIP5, RAB11FIP2, CBLB, RAB31, RAB11FIP3, ARRB2, PSD, NTRK1, ACAP2, DNM1, SH3GL2, EPN2, F2R, SH3GL1, PIP4K2B, VPS25	847	202	5738	1.3750219177761933	0.9944156599930785	0.14547175970170412	29.654367319750808
UP_SEQ_FEATURE	domain:SH3	41	0.1394605258682268	0.01115026092268672	FUT8, CACNB1, ABI2, ABI1, CACNB3, CACNB4, MCF2L, ARHGAP12, SLA, CTTN, STAC2, MACF1, STAC, MAP3K9, DLG4, PSTPIP1, DLG3, SASH1, NGEF, BAIAP2, TRIO, AHI1, MPP6, MPP7, ARHGAP26, DOCK4, TJP1, ARHGAP33, EPS8, FNBP1L, FYN, MAP3K10, SRGAP3, EPS8L2, SPATA13, DST, ABL2, SH3GL2, SRGAP1, ARHGAP10, SH3GL1	2765	163	16021	1.4574401757285969	1.0	0.5874359524899804	19.497944167721325
UP_SEQ_FEATURE	repeat:LRR 7	40	0.13605904962753834	0.009869733876810418	FMOD, PXDN, PODN, RTN4RL1, LRRC33, LRRC8B, LUM, LRRC8C, LRRC8D, LRIG2, DCN, 4930451C15RIK, LGR5, IGSF10, OGN, LINGO1, LINGO4, LINGO3, LRRTM4, LRRC57, LRRC58, RTN4RL2, FBXL16, LRRC1, RTN4R, LRGUK, SLIT1, SLIT3, PRELP, SLITRK2, DNAHC3, SLITRK4, SLITRK3, BGN, ERBB2IP, FBXL7, LRCH4, EPYC, SLITRK6, SLITRK5	2765	157	16021	1.4762327086764722	1.0	0.5682602549058196	17.457389776405375
SP_PIR_KEYWORDS	potassium channel	37	0.12585462090547297	4.493344734287518E-12	KCNH1, KCNC2, KCNC1, SCN1A, KCNC4, KCNC3, KCNA2, KCNA6, KCNA5, KCNJ2, KCNK13, KCNIP2, KCNIP1, KCNJ11, KCNIP4, KCNS3, KCNQ5, KCNE2, KCNG3, KCNQ1, KCNG4, HCN3, KCNG1, KCNE4, KCNG2, HCN1, HCN2, KCNB1, TMEM38A, KCNK2, KCNV1, KCNK3, KCNJ6, KCNT1, KCNH7, KCNH3, KCNH5	2817	70	17854	3.350058319387393	2.6690170074061825E-9	2.0530899202952924E-10	6.627132176362238E-9
SP_PIR_KEYWORDS	guanine-nucleotide releasing factor	37	0.12585462090547297	1.0407977255990195E-6	RALGPS2, CYTH4, RGL3, RASGEF1B, CYTH3, RAB3IP, MCF2L, RGL1, RASGRP1, RASGRP2, RAPGEF5, RAPGEF4, D10BWG1379E, RAPGEF2, RAPGEF1, KNDC1, ARHGEF10L, FGD3, NET1, NGEF, ARHGEF3, ARHGEF2, ABR, BCR, VAV3, TRIO, ARHGEF17, ARHGEF15, RGNEF, RIC8B, ARHGEF10, DOCK4, PLCE1, PSD, RASGRF2, RAPGEFL1, KALRN	2817	102	17854	2.2990596309521325	6.180431033429024E-4	2.289729973103949E-5	0.0015350541709091559
UP_SEQ_FEATURE	calcium-binding region:1	37	0.12585462090547297	3.956003356828309E-4	CABP1, CABP7, KCNIP2, KCNIP1, NECAB2, CALB2, KCNIP4, NECAB1, SMOC2, EFHD1, CGREF1, DGKB, MACF1, PVALB, SLC25A23, RASGRP1, DGKG, RASGRP2, PLS1, CALN1, CIB2, PLS3, HPCAL1, ACTN4, HPCAL4, ACTN1, CAPN2, P4HTM, EPS15, SLC25A13, RAB11FIP3, CAPN11, HPCA, GM7308, DST, CALM2, RCN1, RCN2	2765	120	16021	1.7865491259795059	0.9009321287608266	0.1428394225745826	0.7624274810500098
KEGG_PATHWAY	mmu04270:Vascular smooth muscle contraction	36	0.1224531446647845	3.19132044397408E-5	KCNMB4, ADCY1, ADCY2, ADCY7, ADCY8, PPP1R12B, CALD1, GNA11, EDNRA, PLCB4, PPP1R12A, GUCY1A3, PLCB1, RAMP1, PPP1R14A, PRKCA, RAMP3, MAP2K1, ACTA2, ROCK2, NPR1, PRKCH, PPP1CC, PPP1CB, PRKCD, PRKCC, PRKCB, PRKCQ, MAPK1, GNAQ, ADCY9, ADRA1B, GNAS, GM7308, CALM2, PLA2G4E, ADRA1D	847	120	5738	2.032349468713105	0.005791460349659827	4.466921947978708E-4	0.03937443916898209
UP_SEQ_FEATURE	domain:Fibronectin type-III 2	36	0.1224531446647845	8.353775394695094E-4	DCC, IL27RA, CRLF1, SORL1, ITGB4, HCFC2, CNTFR, EPHB3, EPHB2, NRCAM, A930038C07RIK, EPHB6, SPEG, TNR, COL12A1, ROBO2, ROBO3, BOC, FN1, PTPRJ, TYRO3, PTPRK, PTPRD, PTPRM, CNTN5, CNTN6, RIMBP2, LIFR, EPHA3, EPHA4, EPHA7, EPHA6, EPHA8, CNTN4, MERTK, CHL1	2765	120	16021	1.7382640144665462	0.9924268856139067	0.19128677695260554	1.6035245144624066
UP_SEQ_FEATURE	domain:Fibronectin type-III 1	36	0.1224531446647845	9.836394496507877E-4	DCC, IL27RA, CRLF1, SORL1, ITGB4, HCFC2, CNTFR, EPHB3, EPHB2, NRCAM, A930038C07RIK, EPHB6, SPEG, TNR, COL12A1, ROBO2, ROBO3, BOC, FN1, PTPRJ, TYRO3, PTPRK, PTPRD, PTPRM, CNTN5, CNTN6, RIMBP2, LIFR, EPHA3, EPHA4, EPHA7, EPHA6, EPHA8, CNTN4, MERTK, CHL1	2765	121	16021	1.7238981961651696	0.9968179633989425	0.19841386082858792	1.885556266925248
UP_SEQ_FEATURE	compositionally biased region:Poly-Arg	36	0.1224531446647845	0.08217215224006466	PNMA3, GRIK4, ATP10A, GRIK5, AQP1, SPEG, VWA5B1, PLCH1, FBXO3, PRSS35, MYOF, HHIPL1, AR, MAGI1, ZFP704, CCDC48, ARHGEF17, BSN, PDZRN3, MMP15, GSE1, RERG, DACT3, CDC42SE2, ITGA7, ADRA1B, CACNA1H, NHLH2, CACNA1E, ADAMTS1, MAPK7, SPATA13, GPATCH8, ADRA1D, SRGAP1, KPNA1	2765	161	16021	1.2956005076769288	1.0	0.9748752365098199	80.95846012701672
KEGG_PATHWAY	mmu04916:Melanogenesis	35	0.11905166842409605	9.554687035348565E-7	ADCY1, ADCY2, ADCY7, ADCY8, A, GNAI1, KIT, POMC, TCF7L2, WNT2, EDNRB, PLCB4, WNT3, CAMK2B, PLCB1, CAMK2A, PRKCA, FZD9, MAP2K1, FZD1, LEF1, FZD5, KITL, PRKCC, PRKCB, NRAS, MAPK1, WNT7B, FZD10, GNAQ, ADCY9, WNT9B, GNAS, GM7308, WNT9A, CALM2	847	100	5738	2.371074380165289	1.7388026818443425E-4	2.4841889593840705E-5	0.0011790620593754575
SP_PIR_KEYWORDS	calmodulin-binding	35	0.11905166842409605	1.1042610636316357E-5	KCNH1, ADCY1, MARCKSL1, IQGAP2, RRAD, ITPKA, CAMKK1, CAMKK2, PDE1A, PPP3CB, SNTB1, SNTB2, CAMK2B, PPP3CA, CAMK2A, MYO5B, SLC8A1, NOS1, MYO1B, PNCK, STRN4, MYH9, DAPK2, KCNN3, CAMK1, MYH14, RIT2, NRGN, ADD3, GAP43, ADD2, ADD1, KCNH5, CAMK1D, MYH10	2817	103	17854	2.1536717088688304	0.006537881377094212	2.1156945261346927E-4	0.016285431499551972
SP_PIR_KEYWORDS	wnt signaling pathway	35	0.11905166842409605	2.368478749109629E-4	NKD1, NKD2, TCF7L2, CALCOCO1, WNT2, RSPO4, WNT3, RSPO1, SOSTDC1, RSPO3, RSPO2, FRAT2, WWOX, BCL9, CSNK1A1, FZD9, CSNK1G1, CCDC88C, NLK, FZD1, TLE4, LEF1, FRZB, FZD5, SLC9A3R1, PORCN, SFRP5, CTNNBIP1, DKK3, WNT7B, FZD10, SFRP2, PYGO1, WNT9B, WNT9A	2817	118	17854	1.8798998814702501	0.13125383900572973	0.0033444970755912573	0.34875704408798835
SP_PIR_KEYWORDS	phosphotransferase	35	0.11905166842409605	6.442066189853962E-4	FGFR1, CDK18, NEK1, HK1, PRKG2, KIT, PRKAR2A, CAMK2B, CAMK2A, PRKCA, TYRO3, RET, LTK, MAGI1, PFKL, MAP2K1, ROCK2, FLT3, PIM1, PRKCH, CDK6, MARK3, ALK, PRKCD, PRKCC, PRKCB, EPHA5, PRKCQ, MAPK1, EPHA4, MAPK6, GCK, RPS6KA1, FYN, MAPK14	2817	124	17854	1.7889369839797544	0.3180384767699811	0.007942912866249818	0.9459395047647701
UP_SEQ_FEATURE	calcium-binding region:2	35	0.11905166842409605	3.0731562033443324E-4	CABP1, CABP7, KCNIP2, KCNIP1, NECAB2, KCNIP4, SMOC2, EFHD1, CGREF1, DGKB, MACF1, PVALB, SLC25A23, RASGRP1, DGKG, RASGRP2, PLS1, CALN1, CIB2, PLS3, HPCAL1, ACTN4, HPCAL4, ACTN1, CAPN2, P4HTM, EPS15, SLC25A13, RAB11FIP3, CAPN11, HPCA, GM7308, RCN3, DST, CALM2, RCN2	2765	110	16021	1.84361334867664	0.8340255040128167	0.12039301700626526	0.5927586136175389
UP_SEQ_FEATURE	repeat:LRR 8	35	0.11905166842409605	0.009818923393100514	FMOD, PODN, RTN4RL1, LRRC33, LRRC8B, LUM, LRRC8C, LRRC8D, LRIG2, DCN, 4930451C15RIK, LGR5, IGSF10, LINGO1, LINGO4, LINGO3, LRRTM4, LRRC58, RTN4RL2, LRRC1, RTN4R, LRGUK, SLIT1, SLIT3, PRELP, SLITRK2, DNAHC3, SLITRK4, BGN, SLITRK3, ERBB2IP, FBXL7, LRCH4, SLITRK6, SLITRK5	2765	133	16021	1.524792995146093	1.0	0.5716757972723043	17.375418735628013
UP_SEQ_FEATURE	compositionally biased region:Cys-rich	34	0.1156501921834076	0.018772886559327316	TWSG1, FMOD, ADAMTS19, ADAMTS16, LTBP4, LUM, ADAMTS15, PAMR1, DCN, EPHB3, MREG, EPHB2, MYCBP2, OGN, SPRY2, DAGLA, EPHB6, TNR, ADAM11, UBR3, SPIRE2, ZDBF2, PRELP, EPHA3, EPHA4, EPHA7, BGN, EPHA6, CSRNP3, GPR37, EPHA8, KAZALD1, ADAMTS1, SYT17	2765	134	16021	1.4701735445736956	1.0	0.7199505321757392	30.689221516662222
KEGG_PATHWAY	mmu04530:Tight junction	33	0.11224871594271914	0.0035239144045549906	RAB3B, MYL2, GNAI1, AMOTL1, PTEN, CTTN, PCP4, PPP2R2C, PPP2R2D, ACTB, PRKCA, ACTN4, MAGI1, PRKCH, CLDN22, ACTN1, ACTN2, MYH9, CTNNA1, PRKCD, PRKCC, PRKCB, CTNNA2, NRAS, EPB4.1L3, PRKCQ, TJP1, EPB4.1, RRAS2, CLDN2, MYH14, JAM2, MYH10	847	135	5738	1.655988455988456	0.47401633346918437	0.03013125344845835	4.262742194084035
SP_PIR_KEYWORDS	protein phosphatase	33	0.11224871594271914	0.0015130754588088152	PDP1, CTDSPL, SSH2, STYX, PTEN, DUSP18, DUSP15, PPP3CB, CTDSP2, PPP3CA, PTPRJ, PTPRK, PTPRD, PTPRE, PTPRM, PTPN3, PTPRG, PTPN5, GM12663, PTPN4, DUSP23, PTPN14, PPP1CC, PPP1CB, DUSP4, EYA1, DUSP3, PPM1E, DUSP26, PPM1L, PTPN1, DUSP7, DUSP6	2817	120	17854	1.7429357472488463	0.5932056322670112	0.016518483032095355	2.2085603899757777
UP_SEQ_FEATURE	compositionally biased region:Gln-rich	33	0.11224871594271914	0.013185245748033446	KIFC2, SDCCAG8, ARPP21, POU6F2, MED25, FAM63B, MED12L, PNN, PHC3, EPC2, FAM171B, INTS7, PALM2, PUM1, MKL2, MKL1, TNRC6A, HCN1, SOX13, NR4A2, ISL1, TRERF1, TOX3, AHR, FOXP1, NUMBL, ZFP609, HDAC4, SS18, ZFHX4, IER5L, NCOA6, CELF3, AKAP2	2765	126	16021	1.5175320761215878	1.0	0.634756955555738	22.642635515166234
KEGG_PATHWAY	mmu04722:Neurotrophin signaling pathway	32	0.10884723970203068	0.0036729660379100915	GRB2, NFKBIB, GM12791, BDNF, MAP3K3, BCL2, GAB1, CAMK2B, SHC3, CAMK2A, RAPGEF1, IRS4, PDK1, NTF3, MAP2K1, MAPK10, PRKCD, YWHAE, NTRK3, NRAS, MAPK1, RPS6KA6, YWHAH, RPS6KA1, PSEN1, NTRK1, MAPK14, SORT1, GM7308, MAPK7, NGFR, ZFP369, CRK, CALM2	847	130	5738	1.667568794841522	0.4881432535201341	0.0299827127025849	4.439307385994573
PANTHER_PATHWAY	P00039:Metabotropic glutamate receptor group III pathway	32	0.10884723970203068	4.008949194949737E-4	SNAP29, GNAI1, GRIK4, GRIK5, CACNB1, CACNB3, GRIN3A, CACNB4, GNG12, GNG8, SLC1A2, PRKAR2A, SLC1A3, GRIN2B, SLC1A6, GRIN2D, SNAP23, GNG4, GNG7, GRIN1, GRIA3, GRIA4, GRM1, SLC17A7, GRM4, SLC17A6, GRIA1, GRM8, GRM7, CACNA1E, VAMP2, CACNA1A	659	78	2921	1.8184506439438155	0.05041080441993839	0.012848201403191206	0.4652276238939379
SP_PIR_KEYWORDS	prenylation	32	0.10884723970203068	0.04444782625408933	PALM, RAB3B, RAB3D, NAP1L1, RAB6, RAB1B, GNG11, GNG12, RAB40B, GNG8, DIRAS1, DIRAS2, RASL10A, RASL10B, DNAJA1, PALM2, GNG4, RHOF, RHOG, GNG7, RAP2B, RAP2A, RAB8B, RND2, NRAS, RND3, RAB31, RND1, RAB37, RRAS2, PRICKLE2, RAB15, AKAP2	2817	145	17854	1.398719596538259	0.9999999999981332	0.25679064140053476	48.85848111601694
UP_SEQ_FEATURE	repeat:LRR 9	32	0.10884723970203068	0.014421403285421082	FMOD, PODN, LRRC33, LRRC8B, LUM, LRRC8C, LRRC8D, LRIG2, DCN, LGR5, IGSF10, LINGO1, LINGO4, LINGO3, LRRTM4, LRRC58, LRRC1, RTN4R, LRGUK, SLIT1, PRELP, SLIT3, SLITRK2, DNAHC3, SLITRK4, BGN, SLITRK3, ERBB2IP, FBXL7, LRCH4, SLITRK6, SLITRK5	2765	122	16021	1.519793673850532	1.0	0.6538808218822927	24.49563243440197
UP_SEQ_FEATURE	domain:Ig-like C2-type 1	32	0.10884723970203068	0.033763324588978946	DCC, FGFR1, PXDN, IL1R1, CADM3, CADM4, CADM2, LRIG2, BCAM, KIT, ALCAM, NRCAM, IGSF10, PVRL1, PVRL3, ROBO2, ROBO3, KIRREL2, BOC, TYRO3, MAG, PTPRD, CNTN5, CNTN6, ICAM5, NTRK3, IGSF1, NTRK1, CNTN4, PTGFRN, MERTK, CHL1	2765	130	16021	1.426267909305884	1.0	0.849421104199842	48.53936643771865
UP_SEQ_FEATURE	domain:Ig-like C2-type 2	32	0.10884723970203068	0.03715524353304706	DCC, FGFR1, PXDN, IL1R1, CADM3, CADM4, CADM2, LRIG2, BCAM, KIT, ALCAM, NRCAM, IGSF10, PVRL1, PVRL3, ROBO2, ROBO3, KIRREL2, BOC, TYRO3, MAG, PTPRD, CNTN5, CNTN6, ICAM5, NTRK3, IGSF1, NTRK1, CNTN4, PTGFRN, MERTK, CHL1	2765	131	16021	1.4153803680134727	1.0	0.8661744796934823	51.923367577561265
KEGG_PATHWAY	mmu04540:Gap junction	31	0.10544576346134223	2.2729135175863176E-6	ADCY1, ADCY2, ADCY7, PDGFB, DRD2, GRB2, GNAI1, ADCY8, GNA11, GM12791, PRKG2, PLCB4, GUCY1A3, TUBA1A, PLCB1, TUBB3, TUBB4, GJD2, PRKCA, MAP2K1, GRM1, PRKCC, PRKCB, NRAS, MAPK1, TJP1, TUBA8, GNAQ, ADCY9, GNAS, MAPK7, HTR2C	847	86	5738	2.441970291864583	4.135851803862556E-4	4.596235817910799E-5	0.0028047868696923217
PANTHER_PATHWAY	P05912:Dopamine receptor mediated signaling pathway	31	0.10544576346134223	0.0036558788109091155	SNAP29, ADCY2, ADCY7, DRD2, GRB2, GNAI1, DRD5, SLC6A3, TH, GM12791, GNG11, MYLIP, GNG8, PRKAR2A, HDC, SNAP23, GNG4, DDC, PTPN3, PTPN14, PPP1CC, FLNB, PPP1CB, KCNK3, EPB4.1L3, CLIC4, EPB4.1, SLC18A2, EPB4.1L4B, GNAS, VAMP2, EPB4.1L5	659	84	2921	1.635793771226245	0.3765411690480618	0.04204267654413851	4.169947859230982
PANTHER_PATHWAY	P00019:Endothelin signaling pathway	31	0.10544576346134223	0.02829238069289384	ADCY1, ADCY2, ECEL1, ADCY7, PTGS2, ADCY8, GNA11, PRKG2, EDNRA, EDNRB, ECE2, PRKAR2A, PLCB4, PLCB1, GUCY2G, PRKCA, RET, NOS1, MAP2K1, NPR1, PRKCH, PRKCD, PRKCC, PRKCB, PRKCQ, MAPK1, GNAQ, ADCY9, GNAS, MAPK7, PLA2G4E	659	96	2921	1.431319549822964	0.9753342999178108	0.2187208584199517	28.378125953969768
SP_PIR_KEYWORDS	tyrosine-protein kinase	31	0.10544576346134223	0.0034423458096277085	FGFR1, NEK1, KIT, EPHB3, DDR2, EPHB2, PTK2, PTK2B, LMTK2, LMTK3, DYRK3, DYRK2, TYRO3, RET, LTK, PTPN3, MAP2K1, FLT3, ALK, EPHA3, EPHA5, TYK2, NTRK3, EPHA4, EPHA7, EPHA6, EPHA8, FYN, NTRK1, MERTK, ABL2	2817	116	17854	1.693762011433048	0.8710435956608599	0.03412091665859762	4.958685533630669
UP_SEQ_FEATURE	domain:EGF-like 1	31	0.10544576346134223	0.0031321292746959864	LTBP1, LDLR, LTBP4, NELL1, NPNT, NELL2, EDIL3, DLK1, FAT3, FAT4, TNR, DNER, CNTNAP2, FBN2, HHIP, ODZ1, THBS2, THBS4, MATN2, CUBN, CNTNAP4, LRP1B, MFGE8, NID2, SLIT1, SLIT3, NOTCH3, NOTCH2, THBD, RELN, NCAN	2765	106	16021	1.6945341021529223	0.9999999890480896	0.3604990167339709	5.8874593448296935
KEGG_PATHWAY	mmu05412:Arrhythmogenic right ventricular cardiomyopathy (ARVC)	30	0.10204428722065376	2.790801125103835E-7	CACNB1, ITGA11, ITGB4, CACNB3, CACNB4, TCF7L2, ITGB8, DMD, ACTB, CACNA2D1, SLC8A1, ACTN4, CACNG8, CACNG6, CACNG5, CACNG4, LEF1, ACTN1, ACTN2, ITGA3, CACNG3, ITGA4, CTNNA1, CACNA2D2, CTNNA2, JUP, ITGA8, ITGA7, RYR2, DSP	847	75	5738	2.7097992916174736	5.079129763441159E-5	8.465395427648126E-6	3.4439017512211123E-4
KEGG_PATHWAY	mmu05414:Dilated cardiomyopathy	30	0.10204428722065376	3.124644665265466E-5	ADCY1, ADCY2, MYL2, ADCY7, ADCY8, ITGA11, CACNB1, ITGB4, CACNB3, CACNB4, TPM1, ITGB8, DMD, ACTB, CACNA2D1, SLC8A1, CACNG8, CACNG6, CACNG5, CACNG4, ITGA3, CACNG3, ITGA4, CACNA2D2, TNNT2, ADCY9, ITGA8, ITGA7, RYR2, GNAS	847	92	5738	2.2090755094707664	0.005670802094489891	4.7379956648663235E-4	0.03855194066839651
UP_SEQ_FEATURE	repeat:LRR 10	30	0.10204428722065376	0.003944491100852751	FMOD, PODN, LRRC33, LRRC8B, LUM, LRRC8C, LRRC8D, LRIG2, DCN, LGR5, IGSF10, LINGO1, LINGO4, LINGO3, LRRTM4, LRRC1, RTN4R, LRGUK, SLIT1, PRELP, SLIT3, SLITRK2, DNAHC3, SLITRK4, BGN, SLITRK3, ERBB2IP, FBXL7, SLITRK6, SLITRK5	2765	103	16021	1.687634965501501	0.9999999999065166	0.3881973213037456	7.359885628228103
SP_PIR_KEYWORDS	gpi-anchor	29	0.0986428109799653	0.028838601104865948	ACHE, RTN4RL1, EFNA1, EFNA3, CNTFR, NRN1, GPC4, RGMA, RGMB, GPC3, LY6E, FOLR1, RTN4RL2, LPL, CNTN5, CNTN6, MDGA1, NTNG1, RTN4R, MMP17, NTNG2, LYPD6B, CDH13, CD59A, LSAMP, CNTN4, EFNA5, GFRA4, CAR4	2817	124	17854	1.4822620724403677	0.9999999717447772	0.20444107583516158	35.0525744526885
UP_SEQ_FEATURE	compositionally biased region:Ala-rich	29	0.0986428109799653	0.02657311498179287	SH3RF1, IRX3, E2F3, JPH3, TLN2, FOXO6, ZNRF2, SHISA6, ARX, SAP30, PUM1, POU4F1, ZFP503, JPH1, IRS4, MAF, BHLHE22, CRTAC1, RCOR1, BARHL2, 1190002H23RIK, UBR3, VAX1, PRDM8, SP3, CELF4, CELF2, GNAS, IRGQ	2765	113	16021	1.4870105138504377	1.0	0.7927168638786357	40.60428929682526
PANTHER_PATHWAY	P04374:5HT2 type receptor mediated signaling pathway	28	0.09524133473927685	0.002050365358539045	SNAP29, GNA11, CACNB1, CACNB3, GNG11, CACNB4, GNG12, GNG8, PLCL2, PLCB4, PLCH2, PLCH1, SNAP23, GNG4, PLCB1, GNG7, PRKCA, PRKCH, PRKCD, KCNK3, PRKCC, PRKCB, PRKCQ, PLCE1, GNAQ, SLC18A2, VAMP2, HTR2C	659	71	2921	1.7480176964671184	0.23261654433586998	0.03255439951083616	2.3586533850194713
SP_PIR_KEYWORDS	Proto-oncogene	28	0.09524133473927685	2.2070985584712568E-4	MAF, RET, ARHGEF2, BCR, THRA, LITAF, PDGFB, MAFB, CBL, PIM1, SKI, KIT, MEIS1, MCF2L, MYCL1, RERG, NRAS, WNT3, BTG1, FYN, ETS2, RASGRP1, MAS1, LETMD1, MAFA, MERTK, CRK, NET1	2817	86	17854	2.0635180094278094	0.1228840859208663	0.0031928462399897217	0.32502995342372776
UP_SEQ_FEATURE	short sequence motif:Selectivity filter	28	0.09524133473927685	2.028824478500039E-8	KCNH1, KCNC2, KCNC1, KCNC4, KCNC3, KCNA2, KCNA6, KCNJ10, KCNA5, KCNJ12, KCNJ2, KCNJ11, KCNJ13, KCNS3, KCNQ5, KCNG3, KCNG4, KCNQ1, KCNG1, KCNB1, KCNV1, KCNJ5, KCNJ4, KCNJ6, KCNJ9, KCNH7, KCNH3, KCNH5	2765	53	16021	3.061093861953666	1.1853718919396794E-4	5.927035108421741E-5	3.9242913318915384E-5
UP_SEQ_FEATURE	short sequence motif:Cell attachment site	28	0.09524133473927685	9.807381779284708E-5	ADAMTS13, ITGB4, EDIL3, COL6A2, COL12A1, COL6A1, KIRREL2, PCSK5, THBS2, SPP1, THBS4, FN1, COL18A1, MFGE8, NID2, COL16A1, NTN1, CHST1, COL19A1, FBLN2, LAMA5, ITGA8, FREM1, FBLN5, PTGFRN, CPD, IGFBP2, MFAP4	2765	76	16021	2.1347101932045307	0.43620999003574434	0.05076376756321588	0.18953060095366903
UP_SEQ_FEATURE	domain:Ig-like C2-type	28	0.09524133473927685	0.008353737447491131	WFIKKN2, SCN1B, SCN3B, CRLF1, CNTFR, LINGO1, IGSF11, LINGO4, LINGO3, UNC5B, UNC5A, SEMA3F, SEMA3E, ESAM, PTPRK, HAPLN4, ICOSL, PTPRM, FLT3, TRIO, AMIGO2, SEMA4G, CD80, SEMA4F, KAZALD1, SCN4B, JAM2, KALRN	2765	99	16021	1.6387674210459022	1.0	0.5295618946382521	14.978195676720995
KEGG_PATHWAY	mmu04720:Long-term potentiation	27	0.09183985849858839	2.827045354266677E-6	ADCY1, ADCY8, PLCB4, GRIN2B, PPP1R1A, GRIN2D, PPP3CB, PPP1R12A, CAMK2B, PPP3CA, PLCB1, CAMK2A, PRKCA, MAP2K1, GRIN1, PPP1CC, GRM1, PPP1CB, PRKCC, PRKCB, MAPK1, NRAS, RPS6KA6, RPS6KA1, GNAQ, GRIA1, GM7308, CALM2	847	70	5738	2.613020745488278	5.143906375150165E-4	5.145097452974312E-5	0.0034885774204296283
KEGG_PATHWAY	mmu05410:Hypertrophic cardiomyopathy (HCM)	27	0.09183985849858839	1.118942713366925E-4	ACTB, CACNA2D1, SLC8A1, MYL2, CACNG8, PRKAG2, PRKAB2, CACNG6, ITGB4, CACNB1, ITGA11, CACNG5, CACNG4, CACNG3, CACNB3, ITGA3, CACNB4, ITGA4, CACNA2D2, TPM1, TNNT2, ITGB8, DMD, ITGA8, ITGA7, RYR2, PRKAA2	847	84	5738	2.1775172879068982	0.020159912662207513	0.0013568051609812448	0.137992309543844
PANTHER_PATHWAY	P04394:Thyrotropin-releasing hormone receptor signaling pathway	27	0.09183985849858839	7.894466268644652E-4	SNAP29, GNA11, CACNB1, CACNB3, CACNB4, GNG12, GNG8, PLCL2, PLCB4, PLCH2, PLCH1, SNAP23, PLCB1, GNG4, GNG7, PRKCA, TRHR2, PRKCH, PRKCD, PRKCC, PRKCB, PRKCQ, PLCE1, GNAQ, CACNA1E, VAMP2, CACNA1A	659	64	2921	1.8699497344461307	0.0968610253224903	0.020169583639877864	0.9142426247165658
SP_PIR_KEYWORDS	Sodium transport	27	0.09183985849858839	0.022339232128411185	SLC9A7, SCN1A, SCN1B, SCN3B, ATP1B2, SLC9A4, SLC9A2, SLC24A4, SCN9A, SLC4A7, SLC22A5, NALCN, SLC4A4, HCN3, SCN5A, HCN1, HCN2, SLC8A1, SLC10A4, ATP1A1, TRPM2, SLC17A7, ACCN1, SLC17A6, SCN4B, SLC38A1, SLC5A7	2817	111	17854	1.5416630688196182	0.9999985148045047	0.18151316970898168	28.338436007966983
UP_SEQ_FEATURE	short sequence motif:PDZ-binding	27	0.09183985849858839	9.60381872165816E-5	KCNA2, KCNA6, KCNA5, EPHB3, KCNJ12, AMOTL1, KCNJ2, EPHB2, EPHB6, GRIN2B, GRIN2D, SLC4A7, NOS1AP, CCDC88C, EFNB1, FZD1, FZD5, EPHA3, EPHA5, EPHA4, KCNJ4, FZD10, EPHA7, EPHA6, DACT3, EPHA8, HTR2C	2765	72	16021	2.1728300180831828	0.42946346738796637	0.0545722492069991	0.18560014789456014
UP_SEQ_FEATURE	repeat:LRR 12	27	0.09183985849858839	5.234035460447811E-4	FMOD, PODN, LRRC33, LRRC8B, LUM, LRRC8C, LRRC8D, LRIG2, DCN, LGR5, IGSF10, LINGO1, LINGO4, LINGO3, LRRC1, LRGUK, SLIT1, PRELP, SLIT3, SLITRK2, DNAHC3, SLITRK4, BGN, SLITRK3, ERBB2IP, SLITRK6, SLITRK5	2765	79	16021	1.9803007759745463	0.9530676252061099	0.1562905405218047	1.0075580148867447
UP_SEQ_FEATURE	repeat:LRR 11	27	0.09183985849858839	0.0030217128448652413	FMOD, PODN, LRRC33, LRRC8B, LUM, LRRC8C, LRRC8D, LRIG2, DCN, LGR5, IGSF10, LINGO1, LINGO4, LINGO3, LRRC1, LRGUK, SLIT1, PRELP, SLIT3, SLITRK2, DNAHC3, SLITRK4, BGN, SLITRK3, ERBB2IP, SLITRK6, SLITRK5	2765	88	16021	1.7777700147953313	0.9999999790807802	0.3720730952429918	5.685621926741424
KEGG_PATHWAY	mmu04520:Adherens junction	26	0.08843838225789992	4.943634988427952E-5	FGFR1, WASF1, LMO7, TCF7L2, PVRL1, PVRL3, SSX2IP, ACTB, PTPRJ, PTPRM, ACTN4, BAIAP2, NLK, SMAD4, LEF1, SMAD3, ACTN1, ACTN2, SMAD2, CTNNA1, CTNNA2, MAPK1, TJP1, FYN, PTPN1, WASL	847	76	5738	2.3175914994096813	0.008957280472174922	6.424819547363736E-4	0.060988396537664524
KEGG_PATHWAY	mmu04912:GnRH signaling pathway	26	0.08843838225789992	0.002925744380561658	ADCY1, ADCY2, ADCY7, GRB2, ADCY8, GNA11, GM12791, PLCB4, MAP3K3, PTK2B, CAMK2B, PLCB1, CAMK2A, PRKCA, MAP2K1, MAPK10, PRKCD, PRKCB, NRAS, MAPK1, GNAQ, ADCY9, MAPK14, GNAS, GM7308, MAPK7, CALM2, PLA2G4E	847	97	5738	1.8158448861354202	0.41331425376502595	0.027676420671050028	3.551135471401745
PANTHER_PATHWAY	P00037:Ionotropic glutamate receptor pathway	26	0.08843838225789992	1.7368166680396254E-4	SNAP29, GRIK4, GRIK5, GRIN3A, SLC1A2, SLC1A3, GRIN2B, GRIN2D, SLC1A6, CAMK2B, SNAP23, CAMK2A, NSF, CACNG8, GRIN1, CACNG5, CACNG4, GRIA3, CACNG3, GRIA4, SLC17A7, SLC17A6, GRIA1, CACNA1E, VAMP2, CACNA1A	659	56	2921	2.0579340992846302	0.022157711258296353	0.011140915629682002	0.20179629951649902
PANTHER_PATHWAY	P00042:Muscarinic acetylcholine receptor 1 and 3 signaling pathway	26	0.08843838225789992	0.0019268541696024649	SNAP29, ACHE, GNA11, GNG11, GRIN3A, GNG12, GNG8, PLCB4, GRIN2B, GRIN2D, SNAP23, GNG4, CHAT, GNG7, PRKCA, GRIN1, PRKCH, PRKCD, PRKCC, PRKCB, PRKCQ, GNAQ, CHRM3, CHRM1, VAMP2, SLC5A7	659	64	2921	1.8006923368740515	0.22026719011737717	0.034919174544793874	2.2180236383164798
PANTHER_PATHWAY	P00003:Alzheimer disease-amyloid secretase pathway	26	0.08843838225789992	0.01378081783994706	PRKCA, CACNB1, PRKCH, KLC4, CACNB3, MAPK10, CACNB4, PRKCD, PRKCC, PRKCB, PCSK2, PCSK1, PRKCQ, MAPK1, CHRM3, PSEN1, MAPK6, CHRM2, CHRM1, BACE2, MAPK14, APBA2, CHRNA7, MAPK7, PCSK5, APBA1	659	73	2921	1.578689172053963	0.8330546005820512	0.12863916658803487	14.90298216937087
UP_SEQ_FEATURE	domain:C2	26	0.08843838225789992	9.296747058371146E-5	HECW2, 5730419I09RIK, WWC2, ITSN2, RIMS4, RIMS3, PLCL2, PLCH2, PLCH1, NEDD4L, PLCB1, PRKCA, CAPN5, BCR, ABR, PRKCH, PRKCD, PRKCC, PRKCB, PRKCQ, RAB11FIP5, PLCE1, CADPS2, C2CD4C, INPP4B, PLA2G4E	2765	68	16021	2.2154345282416763	0.4191334173922533	0.05857383210850875	0.17967084371570685
PANTHER_PATHWAY	P04391:Oxytocin receptor mediated signaling pathway	25	0.08503690601721146	0.0027224158146183235	SNAP29, GNA11, CACNB1, OXTR, CACNB3, CACNB4, GNG12, PLCL2, GNG8, PLCB4, PLCH2, PLCH1, SNAP23, PLCB1, GNG4, GNG7, PRKCA, PRKCH, PRKCD, PRKCC, PRKCB, PRKCQ, PLCE1, GNAQ, VAMP2	659	62	2921	1.7872876792794556	0.2964881472586195	0.0383209444171585	3.1206153174451967
SP_PIR_KEYWORDS	Sodium	25	0.08503690601721146	0.028999175429974038	SLC9A7, SCN1B, SCN3B, ATP1B2, SLC9A4, SLC24A4, SCN9A, SLC4A7, NALCN, SLC22A5, SLC4A4, HCN3, SCN5A, HCN1, HCN2, SLC8A1, ATP1A1, SLC10A4, TRPM2, SLC17A7, ACCN1, SLC17A6, SCN4B, SLC38A1, SLC5A7	2817	103	17854	1.5383369349063074	0.9999999743881097	0.19849852767387277	35.210777025507646
UP_SEQ_FEATURE	domain:PDZ	25	0.08503690601721146	0.030681176772988518	PRX, CNKSR2, SHROOM2, SHROOM3, NOS1, PDLIM7, PTPN3, RHPN2, PTPN4, CNKSR3, LIN7B, MPP6, LIN7C, MPP7, RIMS2, PCLO, MAST3, ARHGAP21, PPP1R9B, ERBB2IP, SNTB1, SNTB2, RAPGEF2, MYO18A, GRASP	2765	95	16021	1.5247929951460932	1.0	0.8292825895728223	45.26960888761378
SP_PIR_KEYWORDS	calcium transport	24	0.08163542977652302	3.01437354470787E-4	TRPC1, CACNA2D1, TRPM6, SLC8A1, TRPC3, TRPC6, CACNG8, TRPC7, CACNG6, CACNB1, CACNG5, STIM2, CACNG4, CACNB3, CACNG3, CACNB4, CACNA2D2, TRPM2, SLC24A4, ATP2A1, CACNA1G, CACNA1H, CACNA1E, CACNA1A	2817	70	17854	2.1730108017647956	0.16396163912012052	0.003971664898503424	0.4436677028562874
SP_PIR_KEYWORDS	myristate	24	0.08163542977652302	0.08443665490962779	ARL2, TESC, NKD1, HPCAL1, LZTS1, NKD2, MARCKSL1, HPCAL4, CABP1, BSN, ARF5, BASP1, RFTN1, SLA, ZNRF2, FYN, ARF3, HPCA, ARF4, 1700019D03RIK, PCMTD1, AKAP7, ARL4C, ABL2	2817	109	17854	1.3955115240691347	1.0	0.39002722388374433	72.77644114603056
KEGG_PATHWAY	mmu04070:Phosphatidylinositol signaling system	23	0.07823395353583455	8.438298713265966E-4	PRKCA, SYNJ1, PIP5K1B, PIP5K1C, ITPKB, DGKH, PIP5K1A, ITPKA, PTEN, PRKCC, PRKCB, PLCE1, DGKB, PLCB4, DGKG, DGKZ, INPP4B, GM7308, IPPK, PLCB1, CALM2, PIP4K2C, INPP5A, PIP4K2B	847	75	5738	2.0775127902400627	0.14242090874996582	0.008997039261530948	1.0363360193944016
KEGG_PATHWAY	mmu04512:ECM-receptor interaction	23	0.07823395353583455	0.0035223882707132847	NPNT, ITGB4, ITGA11, ITGA3, COL2A1, ITGA4, COL5A3, SDC2, COL5A1, SDC3, LAMA5, ITGB8, TNR, ITGA8, ITGA7, COL6A2, COL6A1, RELN, SV2A, THBS2, SPP1, THBS4, FN1	847	83	5738	1.8772705935904184	0.47386970119018357	0.03160025673190481	4.260932800488593
KEGG_PATHWAY	mmu04012:ErbB signaling pathway	23	0.07823395353583455	0.0064783655583364776	GRB2, STAT5B, GM12791, PAK6, PAK7, PTK2, PAK4, GAB1, CAMK2B, NRG1, SHC3, CAMK2A, PRKCA, MAP2K1, CBL, MAPK10, GM6226, PRKCC, PRKCB, MAPK1, NRAS, NCK2, CBLB, CRK, ABL2	847	87	5738	1.7909593019310888	0.6936105598602977	0.0480925158396156	7.70723838727344
KEGG_PATHWAY	mmu04666:Fc gamma R-mediated phagocytosis	23	0.07823395353583455	0.025872361451142023	PRKCA, VAV3, MAP2K1, PPAP2C, MARCKSL1, WASF1, PIP5K1B, PIP5K1C, ARPC5, PIP5K1A, PRKCD, PRKCC, PRKCB, ARPC1A, MAPK1, ARPC3, GM16372, GAB2, ARPC2, WASL, CRK, PLA2G4E, DNM1, PIP4K2B	847	98	5738	1.5899332578367829	0.9915260179929128	0.1426382303570436	27.636862190641175
SP_PIR_KEYWORDS	collagen	23	0.07823395353583455	0.009589585643076663	COL18A1, CTHRC1, COL15A1, COL2A1, COL25A1, EMILIN2, COL16A1, COL5A3, COL5A1, C1QTNF6, COL19A1, COL27A1, CCBE1, EMID2, COL6A3, COL6A2, COL12A1, COL6A1, C1QL2, C1QL3, SCARA3, C1QL4, EDA	2817	84	17854	1.7353905708538295	0.9967324078508384	0.08684752804819851	13.248167163698843
UP_SEQ_FEATURE	active site:Phosphocysteine intermediate	23	0.07823395353583455	0.0066628408476372535	PTPRJ, PTPRK, PTPRD, PTPRE, PTPRM, PTPN3, PTPRG, PTPN5, SSH2, PTPN4, PTPN14, DUSP23, PTPRN, PTEN, DUSP4, DUSP18, DUSP3, MTMR1, DUSP26, DUSP15, PTPN1, DUSP7, DUSP6	2765	75	16021	1.776892103676914	1.0	0.47289126231080747	12.129717243807702
UP_SEQ_FEATURE	domain:Ig-like C2-type 3	23	0.07823395353583455	0.03698491978114907	DCC, MAG, FGFR1, PXDN, PTPRD, IL1R1, CNTN5, CNTN6, ICAM5, LRIG2, BCAM, KIT, IGSF10, ALCAM, NRCAM, IGSF1, CNTN4, ROBO2, ROBO3, PTGFRN, KIRREL2, BOC, CHL1	2765	87	16021	1.5318035376525119	1.0	0.8673694955110164	51.758598932632616
UP_SEQ_FEATURE	cross-link:Glycyl lysine isopeptide (Lys-Gly) (interchain with G-Cter in SUMO)	23	0.07823395353583455	0.04154867131357707	MEF2C, SATB1, AR, CEBPB, KLF8, CEBPD, MAFB, LEF1, ZEB2, KCNA5, TCF7L2, HNRNPA1, SUMO3, HDAC4, SUMO2, TOP1, MSX1, HDAC1, SP3, HIPK2, IRF2, HSF4, KLF3	2765	88	16021	1.5143966792700971	1.0	0.8863982725193043	55.99363693093664
KEGG_PATHWAY	mmu04730:Long-term depression	22	0.0748324772951461	0.0011914804510958518	PRKCA, NOS1, MAP2K1, GNAI1, GNA11, GRIA3, PRKG2, GRM1, GSBS, PRKCC, PRKCB, NRAS, MAPK1, PLCB4, GNAQ, GRIA1, RYR1, GUCY1A3, GNAS, PLCB1, PLA2G4E, CACNA1A	847	72	5738	2.0699855699855703	0.1950529102495694	0.011982011019715189	1.4604194183689523
SP_PIR_KEYWORDS	chloride	22	0.0748324772951461	0.001341826899692534	GABRG1, GABRD, SLC12A8, GABRA2, CLCN2, GLRA1, GABRA4, GABRB3, GABRB2, GABRA3, GLRA3, CLCA6, GABRA5, ANO1, NPR1, SLC26A4, CLIC4, TTYH2, ANO3, GABRQ, CLCN5, ANO10	2817	68	17854	2.0505126438221724	0.5495825256871474	0.014936021273831646	1.960899186936782
SP_PIR_KEYWORDS	tumor suppressor	22	0.0748324772951461	0.030898914189470626	MAF, DCC, SASH1, PLA2G16, ZBTB7C, CADM4, LZTS1, MAFB, VHL, EFNA1, DPH1, GPR68, PTEN, ATM, NBL1, RASSF4, TSC2, HIPK2, PLEKHO1, MAFA, PHLDA3, WWOX	2817	88	17854	1.5844870429534965	0.9999999919973538	0.20336580078232558	37.055391886777414
UP_SEQ_FEATURE	domain:EGF-like 3	22	0.0748324772951461	0.002770441995218661	MATN2, LDLR, LTBP4, NELL1, NPNT, NELL2, LRP1B, EDIL3, DLK1, SLIT1, SLIT3, NOTCH3, NOTCH2, CRB1, FAT3, TNR, DNER, RELN, FBN2, ODZ1, THBS2, LRP4	2765	66	16021	1.9314044605183849	0.9999999087951363	0.3707001081612402	5.224776455971069
UP_SEQ_FEATURE	domain:EGF-like 2	22	0.0748324772951461	0.02447658279552371	MATN2, LTBP1, CNTNAP4, MFGE8, EDIL3, NID2, DLK1, SLIT1, SLIT3, NOTCH3, NOTCH2, THBD, CRB1, FAT3, FBLN2, TNR, DNER, CNTNAP2, RELN, HHIP, FBN2, ODZ1	2765	79	16021	1.6135784100533341	1.0	0.7752446420986389	38.08039746643421
KEGG_PATHWAY	mmu04350:TGF-beta signaling pathway	21	0.07143100105445764	0.02574977165327438	BMP4, SMAD9, LTBP1, ROCK2, SMAD4, SMAD3, SMAD2, DCN, LEFTY1, INHBA, ACVR2A, MAPK1, ACVR2B, LEFTY2, ID4, CHRD, THBS2, ACVR1, PITX2, THBS4, TFDP1	847	87	5738	1.6352237104588203	0.9913297033179598	0.1463736774028387	27.524404716867622
UP_SEQ_FEATURE	region of interest:Calmodulin-binding	21	0.07143100105445764	8.582937618648627E-5	KCNH1, SLC8A1, NOS1, PNCK, STRN4, RRAD, DAPK2, ITPKA, CAMKK1, CAMKK2, KCNN3, PDE1A, PPP3CB, SNTB1, CAMK1, SNTB2, CAMK2B, PPP3CA, CAMK2A, KCNH5, CAMK1D	2765	49	16021	2.4832343063807802	0.39439212181423355	0.06076571021328059	0.1658864730622267
UP_SEQ_FEATURE	domain:C2 2	21	0.07143100105445764	9.061549687538102E-4	CPNE8, SYT1, CPNE9, CPNE4, SYT5, SYT10, CPNE6, SYT2, SYT12, CPNE7, SYT9, RIMS2, PCLO, MCTP2, CPNE2, UNC13C, DOC2B, SYT17, RASA4, MYOF, UNC13A	2765	57	16021	2.1347101932045303	0.9949937283642261	0.19094028639018434	1.738256900841062
UP_SEQ_FEATURE	domain:C2 1	21	0.07143100105445764	9.061549687538102E-4	CPNE8, SYT1, CPNE9, CPNE4, SYT5, SYT10, CPNE6, SYT2, SYT12, CPNE7, SYT9, RIMS2, PCLO, MCTP2, CPNE2, UNC13C, DOC2B, SYT17, RASA4, MYOF, UNC13A	2765	57	16021	2.1347101932045303	0.9949937283642261	0.19094028639018434	1.738256900841062
UP_SEQ_FEATURE	domain:Fibronectin type-III 3	21	0.07143100105445764	0.023314210981146066	DCC, PTPRJ, PTPRK, PTPRD, PTPRM, CNTN5, IL27RA, CNTN6, RIMBP2, SORL1, ITGB4, LIFR, NRCAM, TNR, COL12A1, CNTN4, ROBO2, ROBO3, BOC, CHL1, FN1	2765	74	16021	1.6443037974683543	1.0	0.769236563714691	36.63760091923071
COG_ONTOLOGY	Transcription / Cell division and chromosome partitioning	20	0.06802952481376917	0.04201743767828353	EGR1, GLIS3, DPF3, EGR3, ZBTB7C, KLF9, ZIC1, ZFP651, ZFP768, ZIC3, ZFP493, ZIC2, ZFP609, DPF1, GLI1, GM13152, MAZ, ZIC4, ZFP677, ZIC5	283	92	2040	1.567060992471962	0.7957174151494948	0.41105177824986117	31.984637279799887
SP_PIR_KEYWORDS	proteoglycan	20	0.06802952481376917	1.1616228884930814E-4	HAPLN2, HAPLN1, FMOD, HAPLN4, NRP1, SPOCK3, PRG4, LUM, DCN, SDC2, SDC3, GPC4, GPC3, BGN, TNR, TGFBR3, GNAS, ITIH3, NCAN, EPYC	2817	50	17854	2.5351792687255945	0.06667743355848699	0.0018632459847112148	0.1711901864483778
SP_PIR_KEYWORDS	calcium channel	20	0.06802952481376917	2.1246972024510088E-4	TRPC1, CACNA2D1, TRPM6, TRPC3, TRPC6, CACNG8, TRPC7, CACNG6, CACNB1, CACNG5, CACNG4, CACNG3, CACNB3, CACNB4, CACNA2D2, TRPM2, CACNA1G, CACNA1H, CACNA1E, CACNA1A	2817	52	17854	2.4376723737746104	0.11857946026313704	0.0032311895450694017	0.3129127772609541
SP_PIR_KEYWORDS	heparin-binding	20	0.06802952481376917	2.827043582039701E-4	LPL, FGFR1, COL25A1, COL5A1, PCOLCE2, RSPO4, SERPINE2, RSPO1, CTGF, RPL22, RSPO3, RSPO2, SERPINC1, LIPG, PTN, ADAMTS1, FGF1, THBS2, CYR61, FN1	2817	53	17854	2.3916785554015045	0.15460400647578676	0.003809772740148154	0.41614928301911824
UP_SEQ_FEATURE	domain:EGF-like 2; calcium-binding	20	0.06802952481376917	6.838091496966988E-4	BMP1, CUBN, LDLR, SCUBE2, LTBP4, NELL1, NPNT, SCUBE1, NELL2, LRP1B, CELSR2, CELSR1, GAS6, FAT4, FBLN5, MEGF6, NCAN, THBS2, LRP4, THBS4	2765	52	16021	2.2285436082904435	0.9816268250894306	0.18114084199941383	1.3144084003333556
KEGG_PATHWAY	mmu04260:Cardiac muscle contraction	19	0.06462804857308072	0.03210939723238688	CACNA2D1, SLC8A1, UQCRC1, MYL2, CACNG8, ATP1B2, CACNG6, CACNB1, CACNG5, CACNG4, ATP1A1, CACNG3, CACNB3, CACNB4, TPM1, CACNA2D2, TNNT2, COX6A2, RYR2	847	78	5738	1.650198286561923	0.9973674189880701	0.1560890514604284	33.15125844186079
PANTHER_PATHWAY	P04385:Histamine H1 receptor mediated signaling pathway	19	0.06462804857308072	0.003387788598890058	PRKCA, GNA11, PRKCH, GNG12, PRKCD, PRKCC, PRKCB, GNG8, PLCL2, PRKCQ, HRH1, PLCE1, PLCB4, GNAQ, PLCH2, PLCH1, GNG4, PLCB1, GNG7	659	43	2921	1.958534777852278	0.35452363161019984	0.042832300136668056	3.8696484038441725
PANTHER_PATHWAY	P05911:Angiotensin II-stimulated signaling through G proteins and beta-arrestin	19	0.06462804857308072	0.03672760745538668	EGR1, PRKCA, MAP2K1, PRKCH, GNG11, GNG12, PRKCD, PRKCC, PRKCB, GNG8, MAPK1, PRKCQ, ARRB2, GNAQ, AGT, GNG4, PLCB1, RHOF, GNG7	659	53	2921	1.588999914106565	0.9919899422276827	0.2471916112512228	35.28413787962599
SP_PIR_KEYWORDS	LIM domain	19	0.06462804857308072	0.03224630225359509	ABLIM2, PDLIM7, LMO3, MICAL2, FHL1, LMO4, FHL2, LMO7, CSRP1, ISL1, NRAP, LHX1, LHX2, PRICKLE2, ZFP185, LIMD2, LHX6, ZYX, LHX8	2817	73	17854	1.6496029488282975	0.9999999964980123	0.20909508862035553	38.33387907932265
UP_SEQ_FEATURE	compositionally biased region:His-rich	19	0.06462804857308072	0.017541547720680253	3110039M20RIK, MAF, NKD1, NKD2, SLC39A10, CCDC85A, BARHL2, TMEM38A, STIM2, ZCCHC14, 2810030E01RIK, CITED2, SORBS2, FOXG1, POU3F3, VGLL3, MAFA, RERE, IQSEC2, BTBD11	2765	63	16021	1.7474611785642526	1.0	0.7166394352816914	28.987331533306616
UP_SEQ_FEATURE	repeat:LRR 13	19	0.06462804857308072	0.024000441450452714	PODN, LRRC33, LRRC8C, LRRC1, LRIG2, LGR5, SLIT1, SLIT3, IGSF10, SLITRK2, DNAHC3, LINGO1, SLITRK4, LINGO4, LINGO3, SLITRK3, ERBB2IP, SLITRK6, SLITRK5	2765	65	16021	1.6936931423007373	1.0	0.7755621098083608	37.49319425579001
PANTHER_PATHWAY	P05734:Synaptic_vesicle_trafficking	18	0.06122657233239225	0.018124506139808736	SNAP29, SYT1, RAB3B, RAB3D, SYT5, SYT2, SYT12, RIMS2, RIMS4, RIMS3, SYNPR, SYN1, SYN2, VAMP2, SNAP23, UNC13C, UNC13A, NSF	659	46	2921	1.7344461305007588	0.9055333996542148	0.15509945183613072	19.161107742614547
PANTHER_PATHWAY	P00007:Axon guidance mediated by semaphorins	18	0.06122657233239225	0.018124506139808736	ARHGEF3, ARHGEF2, PLXNA4, NRP1, PLXNA1, PLXNA2, DPYSL5, AKAP13, DPYSL4, RGNEF, PAK6, PAK7, CRMP1, FYN, PAK4, PLEKHG5, RHOF, NET1	659	46	2921	1.7344461305007588	0.9055333996542148	0.15509945183613072	19.161107742614547
SP_PIR_KEYWORDS	amidation	18	0.06122657233239225	5.046263447147456E-5	VIP, HCRT, AVP, CCK, PMCH, OXT, TAC1, POMC, TRH, GAL, TAC2, ADCYAP1, GRP, CALCA, CHGA, UCN3, ADM, NPY	2817	40	17854	2.852076677316294	0.029530749642553866	8.323079173810921E-4	0.07440116679889863
SP_PIR_KEYWORDS	dioxygenase	18	0.06122657233239225	0.04729918130798162	2410016O06RIK, PTGS2, ALOXE3, PHYH, TET1, P4HTM, BBOX1, HPDL, ADI1, TET3, KDM2B, P4HA1, ASPHD2, P4HA3, KDM4B, ALOX12B, KDM5B, KDM6B	2817	71	17854	1.6068037618683346	0.9999999999996836	0.2661735279349896	51.063660138255116
UP_SEQ_FEATURE	domain:EGF-like 4	18	0.06122657233239225	0.0031421692494254913	MATN2, SCUBE2, NELL1, SCUBE1, NELL2, LRP1B, NID2, DLK1, SLIT1, SLIT3, NOTCH2, THBD, FAT4, TNR, DNER, RELN, ODZ1, THBS4	2765	50	16021	2.0859168173598555	0.9999999896739925	0.3545605087851128	5.905791741679445
UP_SEQ_FEATURE	domain:Tyrosine-protein phosphatase	18	0.06122657233239225	0.007572400213816283	PTPRJ, PTPN3, PTPN5, SSH2, PTPN4, STYX, PTPN14, DUSP23, PTPRN, DUSP4, DUSP18, DUSP3, DUSP26, DUSP27, DUSP15, PTPN1, DUSP7, DUSP6	2765	54	16021	1.9314044605183844	1.0	0.5004098933878638	13.673016335650612
UP_SEQ_FEATURE	domain:DH	18	0.06122657233239225	0.01117930967244966	ARHGEF3, NGEF, ARHGEF2, ABR, VAV3, BCR, ARHGEF17, ARHGEF15, ITSN2, RGNEF, ARHGEF10, MCF2L, RASGRF2, PLEKHG5, SPATA13, FGD3, ARHGEF10L, NET1	2765	56	16021	1.862425729785585	1.0	0.5834911675064136	19.543674457811534
KEGG_PATHWAY	mmu04920:Adipocytokine signaling pathway	17	0.0578250960917038	0.03125314074298143	IRS4, CPT1C, NFKBIB, PRKAB2, PRKAG2, ADIPOR2, MAPK10, POMC, CAMKK1, CAMKK2, PRKCQ, NPY, SLC2A1, PRKAA2, AGRP, ACSL3, ACSL5	847	67	5738	1.7189025357275018	0.9969077402622554	0.15630672533107792	32.41780416643599
KEGG_PATHWAY	mmu05220:Chronic myeloid leukemia	17	0.0578250960917038	0.08521991362104035	E2F3, CTBP2, BCR, MAP2K1, GRB2, STAT5B, CBL, SMAD4, SMAD3, GM12791, CDK6, MAPK1, NRAS, CBLB, HDAC1, GAB2, SHC3, CRK	847	76	5738	1.5153482880755609	0.999999908874534	0.3265832776446842	66.68498768201445
PANTHER_PATHWAY	P00041:Metabotropic glutamate receptor group I pathway	17	0.0578250960917038	0.007102357384279746	PRKCA, RET, GNA11, GRIN1, GRIK5, PRKCH, GRIN3A, GRM1, PRKCD, PRKCC, PRKCB, PRKCQ, PLCB4, GRIN2B, GNAQ, HOMER3, GRIN2D	659	39	2921	1.9321038091903038	0.601270961821933	0.07376080361164994	7.954888920434044
PANTHER_PATHWAY	P04378:Beta2 adrenergic receptor signaling pathway	17	0.0578250960917038	0.04639930720768747	SNAP29, ADCY2, ADCY7, CACNB1, CACNB3, CACNB4, GNG12, GNG8, GNAL, PRKAR2A, RYR1, RYR2, GNAS, VAMP2, SNAP23, GNG4, GNG7	659	47	2921	1.6032350757111034	0.9978208557951562	0.2757145048392252	42.45018593475748
PANTHER_PATHWAY	P04377:Beta1 adrenergic receptor signaling pathway	17	0.0578250960917038	0.04639930720768747	SNAP29, ADCY2, ADCY7, CACNB1, CACNB3, CACNB4, GNG12, GNG8, GNAL, PRKAR2A, RYR1, RYR2, GNAS, VAMP2, SNAP23, GNG4, GNG7	659	47	2921	1.6032350757111034	0.9978208557951562	0.2757145048392252	42.45018593475748
SP_PIR_KEYWORDS	neuropeptide	17	0.0578250960917038	2.2155216429435313E-6	VIP, HCRT, PMCH, NPY2R, TAC1, NPY1R, POMC, GAL, TAC2, PNOC, NPY, PENK, CARTPT, SCG5, NPFFR1, PCSK1N, SST	2817	30	17854	3.5915039640279254	0.0013151557374319056	4.5379015642499354E-5	0.0032676073272619455
SP_PIR_KEYWORDS	Synaptosome	17	0.0578250960917038	1.1058536904920256E-5	SNAP29, LIN7B, LIN7C, BSN, ABI1, RIMS2, CAMK2N1, SLC17A7, SYNPR, SLC17A6, SNPH, RASGRP2, CYFIP2, CYFIP1, VAMP2, SNAP23, ERC2	2817	33	17854	3.2650036036617505	0.00654727979037828	2.052541588047907E-4	0.01630891747116392
SP_PIR_KEYWORDS	chloride channel	17	0.0578250960917038	0.003245860486673229	GABRG1, GABRD, GABRA2, CLCN2, GLRA1, GABRA4, GABRB3, GABRB2, GABRA3, GLRA3, GABRA5, ANO1, CLIC4, TTYH2, ANO3, GABRQ, ANO10	2817	50	17854	2.154902378416755	0.8550225394169263	0.032747939415284755	4.681934447065272
SP_PIR_KEYWORDS	exocytosis	17	0.0578250960917038	0.003245860486673229	CPLX2, CPLX1, NKD2, SRCIN1, RAB3D, LIN7B, SCRN1, LIN7C, RIMS2, RIMS4, RIMS3, CADPS2, STXBP5, EXOC6, RAPGEF4, UNC13C, UNC13A	2817	50	17854	2.154902378416755	0.8550225394169263	0.032747939415284755	4.681934447065272
UP_SEQ_FEATURE	domain:Cadherin 2	17	0.0578250960917038	0.005120139870097922	CLSTN2, PCDH20, CDHR1, CELSR2, CELSR1, PCDH19, CDH6, PCDH18, CDH13, CDH7, CDH20, CDH9, FAT3, FAT4, DSC3, CDH24, CDH11	2765	48	16021	2.0521172393007836	0.9999999999999059	0.451120628202894	9.45214438034282
UP_SEQ_FEATURE	domain:Cadherin 1	17	0.0578250960917038	0.005120139870097922	CLSTN2, PCDH20, CDHR1, CELSR2, CELSR1, PCDH19, CDH6, PCDH18, CDH13, CDH7, CDH20, CDH9, FAT3, FAT4, DSC3, CDH24, CDH11	2765	48	16021	2.0521172393007836	0.9999999999999059	0.451120628202894	9.45214438034282
UP_SEQ_FEATURE	domain:Ig-like C2-type 4	17	0.0578250960917038	0.024262999087239216	DCC, MAG, PXDN, CNTN5, CNTN6, ICAM5, KIT, IGSF10, NRCAM, IGSF1, CNTN4, ROBO2, PTGFRN, ROBO3, KIRREL2, BOC, CHL1	2765	56	16021	1.758957633686386	1.0	0.7757441685479536	37.817644443743625
UP_SEQ_FEATURE	domain:Fibronectin type-III 4	17	0.0578250960917038	0.024262999087239216	NRCAM, PTPRJ, DCC, PTPRK, PTPRD, PTPRM, IL27RA, CNTN5, CNTN6, TNR, SORL1, ITGB4, LIFR, COL12A1, CNTN4, CHL1, FN1	2765	56	16021	1.758957633686386	1.0	0.7757441685479536	37.817644443743625
UP_SEQ_FEATURE	domain:F-box	17	0.0578250960917038	0.09330695395526556	FBXO40, FBXL21, CCNF, FBXO38, KDM2B, FBXO17, FBXO25, FBXO31, FBXO41, FBXL7, FBXO3, FBXO34, FBXO21, FBXL16, FBXO9, FBXO45, FBXO11	2765	66	16021	1.492448901309661	1.0	0.983228395820924	84.9627809766773
KEGG_PATHWAY	mmu00562:Inositol phosphate metabolism	16	0.05442361985101534	0.009392783230560666	SYNJ1, PIP5K1B, PIP5K1C, ITPKB, PIP5K1A, ITPKA, PTEN, PLCE1, PLCB4, INPP4B, IPPK, PLCB1, IPMK, PIP4K2C, INPP5A, PIP4K2B	847	54	5738	2.0072587345314616	0.8204974016876269	0.06639572954086215	10.9931367702226
KEGG_PATHWAY	mmu05217:Basal cell carcinoma	16	0.05442361985101534	0.011206444865262385	FZD9, BMP4, FZD1, LEF1, FZD5, TCF7L2, SHH, GLI1, WNT2, FZD10, WNT7B, WNT3, WNT9B, PTCH1, HHIP, WNT9A	847	55	5738	1.9707631211763443	0.8714049873851462	0.0758565506326454	12.983339905842694
KEGG_PATHWAY	mmu05014:Amyotrophic lateral sclerosis (ALS)	16	0.05442361985101534	0.01564818640379692	PRPH, NOS1, GRIN1, GPX1, SLC1A2, GRIN2B, GRIA1, MAPK14, BCL2, GRIN2D, GM8566, PPP3CB, NEFH, APAF1, PPP3CA, NEFM	847	57	5738	1.9016135379771741	0.9433287316162681	0.09424129851551699	17.68597689134793
KEGG_PATHWAY	mmu00564:Glycerophospholipid metabolism	16	0.05442361985101534	0.060182924353127984	GPD2, GPD1, ACHE, PPAP2C, DGKH, GPD1L, DGKB, DGKG, NAA10, GNPAT, DGKZ, LCLAT1, ETNK1, CHAT, PLA2G4E, AGPAT1	847	67	5738	1.6177906218611782	0.9999875867262181	0.2571660476047344	53.511123650156975
PANTHER_PATHWAY	P00002:Alpha adrenergic receptor signaling pathway	16	0.05442361985101534	0.0012894946264696418	SNAP29, STX6, PRKCA, GNA11, PRKCH, PRKCD, PRKCC, PRKCB, PRKCQ, PLCE1, PLCB4, GNAQ, ADRA1B, VAMP2, SNAP23, PLCB1	659	31	2921	2.287728229477703	0.1533366707450462	0.02736074886441764	1.4893794795636461
SP_PIR_KEYWORDS	neurotransmitter transport	16	0.05442361985101534	2.613700102677859E-4	CPLX2, ICA1, CPLX1, SLC6A11, SLC6A3, SLC6A13, SLC6A15, RIMS2, RIMS4, RIMS3, SLC17A7, SLC32A1, SLC6A9, SLC17A6, SLC18A2, SV2A	2817	37	17854	2.74073434456821	0.14381951574837892	0.0036045131819604226	0.38480089049584
SP_PIR_KEYWORDS	serine/threonine-specific protein kinase	16	0.05442361985101534	7.028591479242125E-4	PRKCA, ACVR2A, PRKCQ, MAPK1, ACVR2B, CDK18, RPS6KA1, ROCK2, PIM1, PRKCH, CAMK2B, PRKG2, CAMK2A, PRKCD, PRKCC, PRKCB	2817	40	17854	2.5351792687255945	0.34140409310367137	0.008318113917586745	1.0316480563508978
SP_PIR_KEYWORDS	G protein-coupled receptor	16	0.05442361985101534	0.02801591074268734	OPRM1, PTGER4, DRD2, DRD5, OPRK1, TACR1, HTR1A, PNOC, SSTR1, HTR7, CHRM1, MAS1, ADRA2B, HTR2C, ADRA1D, OPRD1	2817	57	17854	1.779073171035505	0.9999999532761538	0.20643460669853508	34.236371298795234
SP_PIR_KEYWORDS	hydroxylation	16	0.05442361985101534	0.07019076697758708	COL18A1, EIF2C2, LTBP1, COL15A1, CELSR2, COL2A1, COL25A1, CELSR1, COL16A1, COL5A1, C1RA, COL19A1, EMID2, COL6A2, COL6A1, COL12A1	2817	64	17854	1.5844870429534967	1.0	0.35380569452091215	65.81439978464387
UP_SEQ_FEATURE	domain:Cadherin 5	16	0.05442361985101534	7.057691442575435E-4	PCDH20, CDHR1, CELSR2, CELSR1, PCDH19, CDH6, PCDH18, CDH13, CDH7, CDH20, CDH9, FAT3, FAT4, DSC3, CDH24, CDH11	2765	37	16021	2.5056057866184447	0.983840788551388	0.17835035022334544	1.3563468502121756
UP_SEQ_FEATURE	domain:EGF-like 5	16	0.05442361985101534	0.0013440224475881161	MATN2, CUBN, SCUBE2, SCUBE1, LRP1B, DLK1, SLIT1, SLIT3, NOTCH3, THBD, FAT4, DNER, TNR, RELN, MEGF6, ODZ1	2765	39	16021	2.377113182176473	0.999613510277523	0.25252322726547183	2.5679032305535587
UP_SEQ_FEATURE	compositionally biased region:Poly-His	16	0.05442361985101534	0.0013440224475881161	MAFB, NLK, NR4A3, ZIC1, ZIC3, ZIC2, ZFP609, GRIN2B, PLK2, PRRT1, D3BWG0562E, CACNA1H, POU4F1, FBXO41, ERC2, FAM84A	2765	39	16021	2.377113182176473	0.999613510277523	0.25252322726547183	2.5679032305535587
UP_SEQ_FEATURE	domain:Cadherin 4	16	0.05442361985101534	0.0052287088095594805	PCDH20, CDHR1, CELSR2, CELSR1, PCDH19, CDH6, PCDH18, CDH13, CDH7, CDH20, CDH9, FAT3, FAT4, DSC3, CDH24, CDH11	2765	44	16021	2.106986684201874	0.9999999999999503	0.44515542670669683	9.643083698087374
UP_SEQ_FEATURE	domain:FERM	16	0.05442361985101534	0.0052287088095594805	PTPN3, TLN2, PTPN4, PTPN14, PLEKHH1, MYLIP, TYK2, EPB4.1L3, PTK2, EZR, FRMD7, FRMD8, PTK2B, EPB4.1, EPB4.1L4B, EPB4.1L5	2765	44	16021	2.106986684201874	0.9999999999999503	0.44515542670669683	9.643083698087374
UP_SEQ_FEATURE	domain:Cadherin 3	16	0.05442361985101534	0.006615463964321784	PCDH20, CDHR1, CELSR2, CELSR1, PCDH19, CDH6, PCDH18, CDH13, CDH7, CDH20, CDH9, FAT3, FAT4, DSC3, CDH24, CDH11	2765	45	16021	2.060164757886277	1.0	0.4760590737916284	12.048617654046478
UP_SEQ_FEATURE	domain:VWFA	16	0.05442361985101534	0.03631475625319579	CPNE8, CPNE9, CACNA2D1, CPNE4, CPNE6, CLCA6, CPNE7, ITGA11, ITGB4, CACNA2D2, VWA5B2, VWA5B1, 1300010F03RIK, ANTXR2, ITIH3, CPNE2	2765	54	16021	1.7168039649052307	1.0	0.8648347486889486	51.10507938377866
KEGG_PATHWAY	mmu00561:Glycerolipid metabolism	15	0.05102214361032688	0.006158696911129293	LPL, PPAP2C, DGKH, ALDH3A2, DGKB, DGAT2, ALDH1B1, DGKG, LIPG, DGKZ, LCLAT1, MGLL, AGK, ALDH9A1, AGPAT1	847	47	5738	2.162073902886282	0.6751360059124716	0.04770910083840063	7.340120641129355
KEGG_PATHWAY	mmu05214:Glioma	15	0.05102214361032688	0.07971382321044984	PRKCA, E2F3, MAP2K1, PDGFB, GRB2, GM12791, CDK6, PTEN, PRKCC, PRKCB, MAPK1, NRAS, CAMK2B, GM7308, SHC3, CAMK2A, CALM2	847	64	5738	1.5877730224321134	0.9999997283763574	0.3147497711909243	64.12424963944122
PANTHER_PATHWAY	P05731:GABA-B_receptor_II_signaling	15	0.05102214361032688	0.03147217101440187	ADCY1, ADCY2, ADCY7, GNAI1, ADCY8, GNG11, GNG12, GABBR2, GNG8, PRKAR2A, ADCY9, CACNA1G, GNG4, CACNA1A, GNG7	659	38	2921	1.7496605702419932	0.9838392538528201	0.22726810565665534	31.05685736411551
UP_SEQ_FEATURE	zinc finger region:Phorbol-ester/DAG-type	15	0.05102214361032688	0.003086320757323469	ARHGEF2, VAV3, ROCK2, RGNEF, KSR2, STAC2, STAC, RASGRP1, RASGRP2, CHN1, CHN2, CIT, UNC13C, KSR1, UNC13A	2765	38	16021	2.28718949271914	0.9999999856749769	0.36334759605384437	5.803772725770107
UP_SEQ_FEATURE	domain:IQ	15	0.05102214361032688	0.06178124087754794	UBE3B, PCP4L1, MYH9, DCAF6, RASGRF2, PCP4, SCN9A, NRGN, MYH14, IQSEC3, MYO18A, SCN5A, GAP43, IQSEC2, MYH10	2765	53	16021	1.6398717117608925	1.0	0.9516570951977866	70.87358332390853
UP_SEQ_FEATURE	repeat:LRR 14	15	0.05102214361032688	0.08041205440367766	PODN, LRRC33, LRRC1, LRIG2, SLIT1, LGR5, SLIT3, SLITRK2, DNAHC3, SLITRK4, LINGO3, SLITRK3, ERBB2IP, SLITRK6, SLITRK5	2765	55	16021	1.5802400131514056	1.0	0.9734378774308974	80.23959040305533
UP_SEQ_FEATURE	lipid moiety-binding region:GPI-anchor amidated serine	15	0.05102214361032688	0.08041205440367766	RTN4RL1, CNTN5, CNTN6, EFNA1, MDGA1, NTNG1, RTN4R, MMP17, CNTFR, GPC4, LYPD6B, FOLR1, CD59A, CNTN4, CAR4	2765	55	16021	1.5802400131514056	1.0	0.9734378774308974	80.23959040305533
UP_SEQ_FEATURE	metal ion-binding site:Calcium 2	15	0.05102214361032688	0.09094558147352741	PRKCA, SYT1, SYT5, SYT10, SYT2, CABP1, SYT9, CBX6, PRKCC, PRKCB, NPTX1, NPTX2, PLCH2, PLCH1, ATP2A1	2765	56	16021	1.5520214414879876	1.0	0.9818329055277784	84.18690163523672
KEGG_PATHWAY	mmu04330:Notch signaling pathway	14	0.04762066736963842	0.025928164583533184	DTX4, KAT2B, CTBP2, DTX3, MAML2, RFNG, NUMBL, NOTCH3, NOTCH2, HDAC1, PSEN1, NUMB, LFNG, NCOR2	847	50	5738	1.8968595041322314	0.9916139105341397	0.13878569669673935	27.687999938111783
KEGG_PATHWAY	mmu05221:Acute myeloid leukemia	14	0.04762066736963842	0.0677614580124667	JUP, MAPK1, NRAS, MAP2K1, FLT3, GRB2, STAT5B, PIM1, RUNX1T1, LEF1, GM12791, RARA, ZBTB16, KIT, TCF7L2	847	57	5738	1.6639118457300275	0.9999971560374911	0.27923627739058365	57.9314591255587
PANTHER_PATHWAY	P04376:5HT4 type receptor mediated signaling pathway	14	0.04762066736963842	0.044041511122315816	SNAP29, ADCY2, ADCY7, HTR4, GNG12, KCNK3, GNG8, GNAL, SLC18A2, GNAS, VAMP2, SNAP23, GNG4, GNG7	659	36	2921	1.7237396729050751	0.9970033543210884	0.27587577363523486	40.773474143960556
PANTHER_PATHWAY	P05915:Opioid proenkephalin pathway	14	0.04762066736963842	0.05443267558040292	OPRM1, SNAP29, ADCY2, ADCY7, GNAI1, GNG12, KCNK3, GNG8, PENK, VAMP2, SNAP23, GNG4, GNG7, OPRD1	659	37	2921	1.6771521141779109	0.9992683104847162	0.2909412346988276	47.84258566441684
PANTHER_PATHWAY	P05917:Opioid proopiomelanocortin pathway	14	0.04762066736963842	0.06637213795466262	OPRM1, SNAP29, ADCY2, ADCY7, GNAI1, GNG12, POMC, KCNK3, GNG8, VAMP2, SNAP23, GNG4, GNG7, OPRD1	659	38	2921	1.6330165322258605	0.9998579567214058	0.31967889648420944	55.007820559413226
UP_SEQ_FEATURE	domain:EGF-like 4; calcium-binding	14	0.04762066736963842	0.0015485933787646952	NOTCH3, LTBP1, CUBN, CRB1, FAT3, FBLN2, LTBP4, FBLN5, NPNT, CELSR2, FBN2, CELSR1, MEGF6, GAS6	2765	32	16021	2.53496835443038	0.9998832463646417	0.268206352965753	2.953231786949251
UP_SEQ_FEATURE	domain:PDZ 2	14	0.04762066736963842	0.0021562710262211446	IL16, MAGI1, LNX2, PDZRN3, SDCBP2, SLC9A3R1, WHRN, TJP1, DLG4, APBA2, SDCBP, DLG3, GRID2IP, PDZK1	2765	33	16021	2.4581511315688536	0.9999966705208994	0.3342633580220046	4.089345609889339
UP_SEQ_FEATURE	domain:PDZ 1	14	0.04762066736963842	0.0029468829067873788	IL16, MAGI1, LNX2, PDZRN3, SDCBP2, SLC9A3R1, WHRN, TJP1, DLG4, APBA2, SDCBP, DLG3, GRID2IP, PDZK1	2765	34	16021	2.3858525688756513	0.9999999675659627	0.38059850344167334	5.5486020980800355
UP_SEQ_FEATURE	domain:EGF-like 3; calcium-binding	14	0.04762066736963842	0.003958484153584592	LTBP1, CUBN, THBD, FBLN2, FAT4, SCUBE2, SCUBE1, FBLN5, CELSR2, CELSR1, NID2, MEGF6, GAS6, THBS4	2765	35	16021	2.3176853526220618	0.9999999999138838	0.38295864113123534	7.385055957850062
UP_SEQ_FEATURE	domain:EF-hand	14	0.04762066736963842	0.005232966139466425	NKD1, TESC, NKD2, SPARCL1, EFCAB5, STIM2, CCDC48, SPARC, NECAB3, CACNA1E, EHD1, TBC1D8B, EHD3, EHD4	2765	36	16021	2.2533052039381154	0.9999999999999515	0.4392188713863816	9.650563244536182
UP_SEQ_FEATURE	domain:EGF-like 6	14	0.04762066736963842	0.006815683806025686	MATN2, CUBN, SCUBE2, SCUBE1, LRP1B, DLK1, SLIT1, SLIT3, FAT4, DNER, RELN, FBN2, MEGF6, ODZ1	2765	37	16021	2.1924050632911394	1.0	0.4696890021633243	12.39087015378969
UP_SEQ_FEATURE	region of interest:Catalytic	14	0.04762066736963842	0.05074252510622927	HK2, HK1, PDE11A, PCSK2, PCSK1, PDE7B, PDE2A, PDE4A, PDE5A, PDE1A, PPP3CB, OTUD7A, PPP3CA, PCSK5	2765	47	16021	1.7259359008887694	1.0	0.9241202399898429	63.47869861390674
UP_SEQ_FEATURE	domain:LIM zinc-binding 1	14	0.04762066736963842	0.0781392460406156	ABLIM2, PDLIM7, LMO3, FHL1, LMO4, FHL2, CSRP1, ISL1, LHX1, LHX2, PRICKLE2, LHX6, ZYX, LHX8	2765	50	16021	1.622379746835443	1.0	0.9734560432367297	79.2731931604229
UP_SEQ_FEATURE	domain:LIM zinc-binding 2	14	0.04762066736963842	0.0781392460406156	ABLIM2, PDLIM7, LMO3, FHL1, LMO4, FHL2, CSRP1, ISL1, LHX1, LHX2, PRICKLE2, LHX6, ZYX, LHX8	2765	50	16021	1.622379746835443	1.0	0.9734560432367297	79.2731931604229
BIOCARTA	m_biopeptidesPathway:Bioactive Peptide Induced Signaling Pathway	13	0.04421919112894996	0.005827655429052377	PRKCA, MAP2K1, GNAI1, GRB2, GNA11, GM12791, PRKCB, MAPK1, PTK2B, FYN, AGT, MAPK14, GM7308, CAMK2A, CALM2	209	32	1171	2.2761662679425836	0.749724880078298	0.49972495572764963	7.252560792456353
COG_ONTOLOGY	Signal transduction mechanisms / Cytoskeleton / Cell division and chromosome partitioning / General function prediction only	13	0.04421919112894996	0.02596779262092444	TESC, SLC25A13, HPCAL1, MYL2, PLCH2, HPCAL4, HPCA, CAPN2, KCNIP2, CIB2, RCN3, KCNIP1, KCNIP4	283	48	2040	1.952296819787986	0.6222428024206955	0.38538044484469547	21.041655119007217
KEGG_PATHWAY	mmu00620:Pyruvate metabolism	13	0.04421919112894996	0.012574476802729013	LDHB, LDHA, GM5514, ME3, ME2, LDHD, ACACA, GRHPR, ALDH3A2, PCX, ALDH1B1, ACYP2, ALDH9A1, MDH1	847	41	5738	2.1480116335992165	0.9000480028614005	0.0789604764272338	14.457387501590402
KEGG_PATHWAY	mmu04930:Type II diabetes mellitus	13	0.04421919112894996	0.0484348978305026	IRS4, MAPK1, GCK, CACNA1G, HK2, HK1, CACNA1E, MAPK10, MAFA, KCNJ11, ABCC8, PRKCD, CACNA1A	847	49	5738	1.7973158566850589	0.9998809284126733	0.21667721264635242	45.80906564842685
KEGG_PATHWAY	mmu04340:Hedgehog signaling pathway	13	0.04421919112894996	0.09079462520319972	BMP4, CSNK1A1, CSNK1G1, SHH, ZIC2, GLI1, WNT2, WNT7B, WNT3, WNT9B, PTCH1, WNT9A, HHIP	847	54	5738	1.6308977218068128	0.9999999700440579	0.3379837613310436	69.10555988823876
PANTHER_PATHWAY	P00008:Axon guidance mediated by Slit/Robo	13	0.04421919112894996	0.06131288548918179	DCC, ENAH, NTNG1, NTNG2, NTN1, SLIT1, SLIT3, SRGAP3, ROBO2, ROBO3, RHOF, ABL2, SRGAP1	659	34	2921	1.6947692582344014	0.9997147731137566	0.3099631345648701	52.08935509069443
SP_PIR_KEYWORDS	cell shape	13	0.04421919112894996	1.596951840240274E-4	PALM, CDC42EP2, CDC42EP1, SHROOM3, EZR, CDC42SE2, ITGA7, CYFIP1, MYH14, MYH9, CDC42EP3, MYH10, FN1	2817	25	17854	3.2957330493432733	0.09050566921477321	0.0024933735877514795	0.23527489227460618
SP_PIR_KEYWORDS	alternative promoter usage	13	0.04421919112894996	8.607764201354046E-4	COL18A1, DNMT3A, PTPRE, LTK, IL16, ACACA, MTTP, ANK1, GCK, IGSF1, SPEG, RAPGEF4, ST5	2817	29	17854	2.841149180468339	0.4004173073087185	0.009979699927275543	1.262068000091776
UP_SEQ_FEATURE	domain:Ras-GEF	13	0.04421919112894996	2.3518139657570746E-4	RALGPS2, PLCE1, RASGRF2, RASGRP1, RASGRP2, RGL3, RASGEF1B, RAPGEF5, RAPGEF4, RAPGEF2, RAPGEFL1, KNDC1, RGL1	2765	24	16021	3.1385322483423748	0.7469900630495383	0.10821232704895667	0.453924195152855
UP_SEQ_FEATURE	domain:EGF-like 5; calcium-binding	13	0.04421919112894996	0.0027234626569991836	NOTCH2, LTBP1, CRB1, FBLN2, LTBP4, NELL1, FBLN5, NPNT, NELL2, CELSR2, FBN2, CELSR1, NID2	2765	30	16021	2.5108257986739	0.9999998798952096	0.3741681569859754	5.138376987997129
UP_SEQ_FEATURE	domain:CUB 1	13	0.04421919112894996	0.008823506864841808	NRP2, C1RA, NRP1, BMP1, CUBN, ADAMTS13, ST14, CSMD3, SEZ6L, SEZ6, PCOLCE2, NETO1, CSMD1	2765	34	16021	2.2154345282416763	1.0	0.5437043730194697	15.75388767082736
UP_SEQ_FEATURE	domain:CUB 2	13	0.04421919112894996	0.008823506864841808	NRP2, C1RA, NRP1, BMP1, CUBN, ADAMTS13, ST14, CSMD3, SEZ6L, SEZ6, PCOLCE2, NETO1, CSMD1	2765	34	16021	2.2154345282416763	1.0	0.5437043730194697	15.75388767082736
UP_SEQ_FEATURE	repeat:LRR 16	13	0.04421919112894996	0.03977859714244626	PODN, LRRC33, LRRC1, LRIG2, SLIT1, LGR5, SLIT3, DNAHC3, SLITRK4, SLITRK3, ERBB2IP, SLITRK6, SLITRK5	2765	41	16021	1.8371896087857804	1.0	0.8819581795904099	54.39472008937813
UP_SEQ_FEATURE	metal ion-binding site:Calcium 1	13	0.04421919112894996	0.07521750827198957	PRKCA, SYT1, SYT5, SYT10, SYT2, CABP1, SYT9, CBX6, PRKCC, PRKCB, NPTX1, NPTX2, ATP2A1	2765	45	16021	1.6738838657826	1.0	0.9718316923475924	77.96492524056909
UP_SEQ_FEATURE	repeat:WD 8	13	0.04421919112894996	0.09873405175942489	TBL1XR1, WDR7, EML5, 3110047P20RIK, EML4, EML2, PHIP, STXBP5, TEP1, CIRH1A, APAF1, WDR44, TBL1X	2765	47	16021	1.6026547651110001	1.0	0.9861230251790989	86.6114080516894
BIOCARTA	m_nfatPathway:NFAT and Hypertrophy of the heart (Transcription in the broken heart)	12	0.04081771488826151	0.058706708032656665	MEF2C, CSNK1A1, MAPK1, MAP2K1, ACTA1, AGT, MAPK14, FKBP1A, GM7308, PPP3CA, CALR, CAMK2A, CALM2	209	38	1171	1.769327625283304	0.9999994073252747	0.9083492405895814	54.12974976509878
SP_PIR_KEYWORDS	sodium channel	12	0.04081771488826151	0.0023193714374913463	HCN1, ACCN1, HCN2, SCN1A, SCN1B, SCN3B, SCN9A, SCN4B, NALCN, SCN5A, HCN3, TRPM2	2817	28	17854	2.7162635022059947	0.748246996088479	0.02476645733943872	3.3668152601931234
SP_PIR_KEYWORDS	autophosphorylation	12	0.04081771488826151	0.012488051653760948	PRKCA, FGFR1, PRKCQ, PRKAR2A, LTK, FYN, PIM1, PRKCH, CAMK2B, CAMK2A, PRKCC, PRKCB	2817	34	17854	2.2369228841696427	0.9994269912192668	0.11008962511808307	16.91824875101461
SP_PIR_KEYWORDS	nitration	12	0.04081771488826151	0.01567583014530337	ACTB, LPL, PRPH, EIF2C2, VIPR2, CKB, SLC32A1, CRMP1, MGLL, PPP3CA, GM12892, DNM1, NFIA	2817	35	17854	2.1730108017647956	0.9999160422778014	0.13444784751590333	20.787257124726843
SP_PIR_KEYWORDS	phosphoric monoester hydrolase	12	0.04081771488826151	0.02888852482346541	PTPRK, PTPRD, PTPRE, PTPRM, PTPRG, PPP3CB, PTPN14, PPP3CA, PTPN1, PPP1CC, PTPRN, PPP1CB	2817	38	17854	2.001457317414943	0.9999999725945404	0.20007514092952794	35.10179930991821
SP_PIR_KEYWORDS	neurotransmitter receptor	12	0.04081771488826151	0.0412434887661315	GABRD, HTR1A, GLRA1, GRIN2B, GRIA1, DRD2, CHRM1, HTR7, GRIK5, CHRNA7, HTR3A, HTR2C	2817	40	17854	1.9013844515441962	0.9999999999863621	0.24745720299668128	46.26992971721175
UP_SEQ_FEATURE	domain:CH 1	12	0.04081771488826151	2.544173777112055E-4	PARVG, MACF1, ACTN4, CLMN, DMD, SPNB1, PLS1, ACTN1, ACTN2, DST, FLNB, PLS3	2765	21	16021	3.310979075174374	0.7738936631854159	0.10806799321411709	0.49096503703196515
UP_SEQ_FEATURE	domain:CH 2	12	0.04081771488826151	2.544173777112055E-4	PARVG, MACF1, ACTN4, CLMN, DMD, SPNB1, PLS1, ACTN1, ACTN2, DST, FLNB, PLS3	2765	21	16021	3.310979075174374	0.7738936631854159	0.10806799321411709	0.49096503703196515
UP_SEQ_FEATURE	domain:PID	12	0.04081771488826151	0.0024024517410887623	ANKS1B, DAB1, NOS1AP, GULP1, NUMB, RABGAP1L, APBA2, TBC1D1, SHC3, APPL2, EPS8L2, NUMBL	2765	26	16021	2.6742523299485326	0.9999992125097269	0.3554484420990419	4.54600544349516
UP_SEQ_FEATURE	metal ion-binding site:Calcium 1; via carbonyl oxygen	12	0.04081771488826151	0.018794719200510922	PRKCA, SYT1, NPTX1, SYT10, NPTX2, SYT5, SYT2, CABP1, SYT9, PRKCC, CBX6, PRKCB	2765	33	16021	2.1069866842018743	1.0	0.7162900591437829	30.71904550618293
UP_SEQ_FEATURE	repeat:LRR 17	12	0.04081771488826151	0.02915604252020523	DNAHC3, SLITRK4, PODN, SLITRK3, ERBB2IP, LRRC33, LRRC1, SLITRK6, SLITRK5, LGR5, SLIT1, SLIT3	2765	35	16021	1.9865874451046244	1.0	0.8164036570468245	43.57969109987055
BIOCARTA	m_metPathway:Signaling of Hepatocyte Growth Factor Receptor	11	0.03741623864757305	0.04331475207108048	MAPK1, PTK2, MAP2K1, ACTA1, PTK2B, GRB2, GAB1, GM12791, HGF, CRK, PTEN, RAPGEF1	209	32	1171	1.925986842105263	0.9999723132935253	0.9697477905310269	43.47094355927421
PANTHER_PATHWAY	P05730:Endogenous_cannabinoid_signaling	11	0.03741623864757305	0.04864501439729245	GNG8, GNAI1, CNR1, CACNA1G, GNG11, GNG12, GNG4, PLCB1, GRM1, CACNA1A, GNG7	659	26	2921	1.8752772265670596	0.9983923363195163	0.2750471525202287	44.00673204906569
SP_PIR_KEYWORDS	brain	11	0.03741623864757305	0.007982039976758929	KCNJ6, PNOC, ALDOC, OPRK1, SLC6A13, CNP, CHRNA7, GNG4, PTPRN, CALB2, OPRD1	2817	28	17854	2.4899082103554946	0.9914374376820899	0.0750712945503953	11.148069456674015
SP_PIR_KEYWORDS	Signal transduction inhibitor	11	0.03741623864757305	0.026778323604819746	RGS11, ARRB2, RGS2, RGS4, RGS5, RGS6, SOCS6, SOCS7, RGS17, RGS16, RGS14	2817	33	17854	2.112649390604662	0.9999999005068093	0.2006313167213295	32.99051436961471
UP_SEQ_FEATURE	domain:TSP N-terminal	11	0.03741623864757305	4.6574726964680675E-4	COL18A1, COL19A1, NELL1, COL27A1, NELL2, COL15A1, COL12A1, COL16A1, THBS2, COL5A1, THBS4	2765	19	16021	3.354544589321405	0.9342565496072577	0.156440383253867	0.897042657939584
UP_SEQ_FEATURE	domain:EGF-like 6; calcium-binding	11	0.03741623864757305	0.0029604654611759392	NOTCH3, THBD, LTBP1, CRB1, FBLN2, LTBP4, NELL1, FBLN5, NELL2, CELSR2, CELSR1	2765	23	16021	2.7711455303089867	0.9999999700475707	0.3738760365313213	5.57348689691829
UP_SEQ_FEATURE	region of interest:Segment H5 (pore-forming)	11	0.03741623864757305	0.006073251276472791	KCNH1, KCNS3, KCNQ5, KCNB1, KCNH7, KCNG3, KCNH3, KCNQ1, KCNG4, KCNG1, KCNH5	2765	25	16021	2.549453887884268	0.9999999999999997	0.4586521111002059	11.115390719555885
UP_SEQ_FEATURE	domain:SH3 2	11	0.03741623864757305	0.0560279825114087	SH3RF1, VAV3, SORBS2, GRB2, RIMBP2, SH3RF3, FCHSD2, GM12791, ITSN2, CRK, CD2AP, KALRN	2765	34	16021	1.8745984469737262	1.0	0.9396443621279768	67.21750080391504
UP_SEQ_FEATURE	domain:TSP type-1 2	11	0.03741623864757305	0.0787535197606136	THSD7A, ADAMTS19, UNC5B, ADAMTS13, UNC5A, ADAMTSL4, ADAMTS16, ADAMTS15, BAI2, ADAMTS1, THBS2	2765	36	16021	1.7704540888085192	1.0	0.9735094344577753	79.53871111372641
UP_SEQ_FEATURE	domain:TSP type-1 1	11	0.03741623864757305	0.0787535197606136	THSD7A, ADAMTS19, UNC5B, ADAMTS13, UNC5A, ADAMTSL4, ADAMTS16, ADAMTS15, BAI2, ADAMTS1, THBS2	2765	36	16021	1.7704540888085192	1.0	0.9735094344577753	79.53871111372641
KEGG_PATHWAY	mmu00534:Heparan sulfate biosynthesis	10	0.034014762406884586	0.01220012248077537	NDST3, EXTL3, NDST4, XYLT2, HS3ST3A1, XYLT1, HS3ST1, HS6ST3, EXT1, EXTL1	847	27	5738	2.5090734181643275	0.8929091978511112	0.07941287811534581	14.05632009940584
SP_PIR_KEYWORDS	camp	10	0.034014762406884586	0.0239296299229778	HCN1, HCN2, PRKAR2A, PDE7B, PDE2A, PDE4A, PDE1A, PDE11A, RAPGEF4, HCN3	2817	28	17854	2.2635529185049954	0.9999994353350212	0.188205238960651	30.03869106381839
SP_PIR_KEYWORDS	sulfation	10	0.034014762406884586	0.07604599192625366	FMOD, PODXL2, CCK, F5, LUM, SCG5, CHGB, COL5A1, SCG2, FN1	2817	34	17854	1.864102403474702	1.0	0.3719658369308073	68.85563263335268
UP_SEQ_FEATURE	repeat:Spectrin 1	10	0.034014762406884586	0.001450908801240281	MACF1, ACTN4, DMD, DRP2, SPNB1, ACTN1, TRIO, ACTN2, DST, KALRN	2765	18	16021	3.2190074341973074	0.9997932119571447	0.2613960562101667	2.769414341548837
UP_SEQ_FEATURE	repeat:Spectrin 2	10	0.034014762406884586	0.001450908801240281	MACF1, ACTN4, DMD, DRP2, SPNB1, ACTN1, TRIO, ACTN2, DST, KALRN	2765	18	16021	3.2190074341973074	0.9997932119571447	0.2613960562101667	2.769414341548837
UP_SEQ_FEATURE	domain:EGF-like 8; calcium-binding	10	0.034014762406884586	0.003605364085575255	NOTCH3, NOTCH2, LTBP1, FBLN2, SCUBE2, LTBP4, DNER, SCUBE1, FBN2, CELSR1	2765	20	16021	2.897106690777577	0.9999999993167836	0.387860798078971	6.747885602601478
UP_SEQ_FEATURE	domain:EGF-like 7; calcium-binding	10	0.034014762406884586	0.019394056486727273	NOTCH2, LTBP1, CUBN, FBLN2, SCUBE2, LTBP4, SCUBE1, CELSR2, FBN2, CELSR1	2765	25	16021	2.3176853526220613	1.0	0.7235599378372295	31.53302034671678
UP_SEQ_FEATURE	domain:EGF-like 7	10	0.034014762406884586	0.019394056486727273	NOTCH3, MATN2, CRB1, DNER, LRP1B, RELN, MEGF6, ODZ1, SLIT1, SLIT3	2765	25	16021	2.3176853526220613	1.0	0.7235599378372295	31.53302034671678
UP_SEQ_FEATURE	region of interest:Ligand-binding	10	0.034014762406884586	0.04993550392333071	AR, THRA, THRB, NR4A2, NR4A1, RORC, RARA, RORB, NR4A3, NR2E1	2765	29	16021	1.9980046143293633	1.0	0.9225564144721324	62.873422297282474
UP_SEQ_FEATURE	metal ion-binding site:Calcium 3	10	0.034014762406884586	0.0730853094583335	PRKCA, SYT1, SYT10, SYT5, SYT2, PLCH2, PLCH1, SYT9, PRKCC, PRKCB	2765	31	16021	1.8691010908242431	1.0	0.9703834468773256	76.96116924175796
UP_SEQ_FEATURE	domain:PH 2	10	0.034014762406884586	0.0867790251868241	RASGRF2, PLEK, SNTB1, TRIO, SNTB2, PLEKHH1, PLEKHA2, FGD3, KALRN, MPRIP	2765	32	16021	1.8106916817359855	1.0	0.9791754523737725	82.72446643867507
COG_ONTOLOGY	Carbohydrate transport and metabolism	9	0.030613286166196126	0.06378299623809677	HHIPL1, 4933427G17RIK, GBE1, GCK, HKDC1, GAA, HK2, HK1, HHIP	283	32	2040	2.0273851590106005	0.9127166491937658	0.4564583197042652	44.666855523259365
UP_SEQ_FEATURE	domain:Actin-binding	9	0.030613286166196126	8.684233145219702E-4	MACF1, ACTN4, CLMN, DMD, SPNB1, ACTN1, ACTN2, DST, FLNB	2765	14	16021	3.72485145957117	0.9937576713107693	0.19064427505565096	1.666452460166712
UP_SEQ_FEATURE	site:Role in the control of polyamine-mediated channel gating and in the blocking by intracellular magnesium	9	0.030613286166196126	8.684233145219702E-4	KCNJ5, KCNJ4, KCNJ6, KCNJ9, KCNJ10, KCNJ12, KCNJ2, KCNJ11, KCNJ13	2765	14	16021	3.72485145957117	0.9937576713107693	0.19064427505565096	1.666452460166712
UP_SEQ_FEATURE	repeat:Spectrin 4	9	0.030613286166196126	8.684233145219702E-4	MACF1, ACTN4, DMD, SPNB1, ACTN1, TRIO, ACTN2, DST, KALRN	2765	14	16021	3.72485145957117	0.9937576713107693	0.19064427505565096	1.666452460166712
UP_SEQ_FEATURE	region of interest:H5 (pore-forming helix)	9	0.030613286166196126	0.0015802589045774591	KCNJ5, KCNJ4, KCNJ6, KCNJ9, KCNJ10, KCNJ12, KCNJ2, KCNJ11, KCNJ13	2765	15	16021	3.4765280289330924	0.9999029957821617	0.26510320401290677	3.0127474639291107
UP_SEQ_FEATURE	repeat:Spectrin 3	9	0.030613286166196126	0.0026851361655806207	MACF1, ACTN4, DMD, SPNB1, ACTN1, TRIO, ACTN2, DST, KALRN	2765	16	16021	3.259245027124774	0.9999998496578717	0.37878080068197306	5.067835609830629
UP_SEQ_FEATURE	domain:TSP type-1	9	0.030613286166196126	0.0026851361655806207	NOV, RSPO4, RSPO1, CTGF, RSPO3, RSPO2, CYR61, ADAMTS4, GM106	2765	16	16021	3.259245027124774	0.9999998496578717	0.37878080068197306	5.067835609830629
UP_SEQ_FEATURE	domain:N-terminal Ras-GEF	9	0.030613286166196126	0.00431113013478614	RASGRF2, RASGRP1, RASGRP2, RGL3, RASGEF1B, RAPGEF5, RAPGEF4, KNDC1, RGL1	2765	17	16021	3.067524731411552	0.9999999999891231	0.40261387654159186	8.01724915268286
UP_SEQ_FEATURE	zinc finger region:Phorbol-ester/DAG-type 2	9	0.030613286166196126	0.009698763944709038	PRKCA, PRKCQ, DGKB, DGKG, DGKZ, PRKCH, PRKCD, PRKCC, PRKCB	2765	19	16021	2.7446273912629677	1.0	0.5725626220673623	17.18126183056674
UP_SEQ_FEATURE	zinc finger region:Phorbol-ester/DAG-type 1	9	0.030613286166196126	0.009698763944709038	PRKCA, PRKCQ, DGKB, DGKG, DGKZ, PRKCH, PRKCD, PRKCC, PRKCB	2765	19	16021	2.7446273912629677	1.0	0.5725626220673623	17.18126183056674
UP_SEQ_FEATURE	domain:NTR	9	0.030613286166196126	0.013761030518188009	SFRP5, WFIKKN2, C3, SFRP2, NTN5, TIMP2, FRZB, NTN1, PCOLCE2	2765	20	16021	2.6073960216998193	1.0	0.6458379841962045	23.511037169177595
UP_SEQ_FEATURE	domain:TSP type-1 3	9	0.030613286166196126	0.07985711573751539	THSD7A, ADAMTS19, ADAMTS13, ADAMTSL4, ADAMTS16, ADAMTS15, BAI2, ADAMTS1, THBS2	2765	27	16021	1.9314044605183844	1.0	0.9734583440913045	80.00765348847584
UP_SEQ_FEATURE	domain:Sema	9	0.030613286166196126	0.09563139219263486	SEMA6A, PLXNC1, PLXNA4, PLXNA1, SEMA4G, PLXNA2, SEMA4F, SEMA3F, SEMA3E	2765	28	16021	1.862425729785585	1.0	0.9844772369997818	85.69116819794931
UP_SEQ_FEATURE	domain:C1q	9	0.030613286166196126	0.09563139219263486	CBLN4, CBLN1, C1QTNF6, CBLN2, C1QL2, C1QL3, C1QL4, EMILIN2, CAPRIN2	2765	28	16021	1.862425729785585	1.0	0.9844772369997818	85.69116819794931
BIOCARTA	m_CCR3Pathway:CCR3 signaling in Eosinophils	8	0.02721180992550767	0.07857402600047088	MAPK1, PTK2, MAP2K1, GNAQ, ROCK2, GNAS, PLCB1, PRKCB	209	22	1171	2.0374075685080473	0.999999996223176	0.9373772130523744	65.15120157613089
BIOCARTA	m_cxcr4Pathway:CXCR4 Signaling Pathway	8	0.02721180992550767	0.07857402600047088	MAPK1, PTK2, MAP2K1, GNAQ, PTK2B, GNAI1, CRK, PRKCB	209	22	1171	2.0374075685080473	0.999999996223176	0.9373772130523744	65.15120157613089
KEGG_PATHWAY	mmu04320:Dorso-ventral axis formation	8	0.02721180992550767	0.033599678174817266	NOTCH3, MAPK1, NOTCH2, MAP2K1, GRB2, ETS2, GM12791, CPEB1, SPIRE2	847	22	5738	2.46345390147043	0.9980112234320183	0.1586809513490708	34.4103858721269
KEGG_PATHWAY	mmu00512:O-Glycan biosynthesis	8	0.02721180992550767	0.09119359415390318	GALNT3, ST3GAL1, GALNT10, GALNTL4, WBSCR17, GALNT6, GALNT11, GALNT13	847	27	5738	2.0072587345314616	0.9999999723438908	0.33284353395495003	69.27243812622726
SP_PIR_KEYWORDS	Growth factor binding	8	0.02721180992550767	0.004801586372811981	FGFBP3, LTBP1, LTBP4, IGFBP6, IGFBP2, IGFBP3, IGFBP4, CYR61	2817	15	17854	3.380239024967459	0.9426746134675906	0.04653274375506944	6.852769565289307
SP_PIR_KEYWORDS	tyrosine-specific phosphatase	8	0.02721180992550767	0.028200871320788575	PTPRK, PTPRD, PTPRE, PTPRM, PTPRG, PTPN14, PTPN1, PTPRN	2817	20	17854	2.5351792687255945	0.999999958270405	0.20516629969302091	34.420702235307196
SP_PIR_KEYWORDS	peroxidase	8	0.02721180992550767	0.0467199579598817	GPX1, PXDN, PTGS2, GPX3, PRDX4, GPX8, PRDX1, HNRPLL	2817	22	17854	2.304708426114177	0.999999999999546	0.26576224752929845	50.623006327325704
SP_PIR_KEYWORDS	osteogenesis	8	0.02721180992550767	0.0467199579598817	BMP4, BMP3, BMP1, PDLIM7, KAZALD1, MGP, SORT1, IGF2	2817	22	17854	2.304708426114177	0.999999999999546	0.26576224752929845	50.623006327325704
SP_PIR_KEYWORDS	heterotrimer	8	0.02721180992550767	0.07156217501350316	KIF3B, GNAQ, GNA11, COL6A3, COL6A2, NEFH, COL6A1, GNAS	2817	24	17854	2.112649390604662	1.0	0.35664336611854464	66.5505701481857
UP_SEQ_FEATURE	domain:EGF-like 1; calcium-binding	8	0.02721180992550767	0.012124393865070127	BMP1, FBLN2, SCUBE2, SCUBE1, FBLN5, CELSR1, MEGF6, GAS6	2765	16	16021	2.897106690777577	1.0	0.6085272893111027	21.018115661975145
UP_SEQ_FEATURE	domain:Cadherin 6	8	0.02721180992550767	0.017593678476659262	FAT3, FAT4, CDHR1, PCDH20, CELSR2, CELSR1, PCDH19, PCDH18	2765	17	16021	2.726688650143602	1.0	0.7133741067531422	29.06018012736592
UP_SEQ_FEATURE	domain:IGFBP N-terminal	8	0.02721180992550767	0.02459009655980767	NOV, CTGF, KAZALD1, IGFBP6, IGFBP2, IGFBP3, IGFBP4, CYR61	2765	18	16021	2.575205947357846	1.0	0.7733727956229831	38.21961451444273
UP_SEQ_FEATURE	glycosylation site:O-linked (GlcNAc)	8	0.02721180992550767	0.02459009655980767	SYN1, AGFG1, TPPP, BSN, ETL4, PCLO, SRF, NEFM	2765	18	16021	2.575205947357846	1.0	0.7733727956229831	38.21961451444273
UP_SEQ_FEATURE	domain:CRIB	8	0.02721180992550767	0.03327670725291374	PAK6, PAK7, CDC42EP2, CDC42EP1, CDC42SE2, PAK4, WASL, CDC42EP3	2765	19	16021	2.439668792233749	1.0	0.8479097163136148	48.035746173222314
UP_SEQ_FEATURE	domain:CTCK	8	0.02721180992550767	0.05621060383957922	NOV, NBL1, CTGF, SOSTDC1, GREM1, SLIT1, SLIT3, CYR61	2765	21	16021	2.2073193834495823	1.0	0.938802038463704	67.33995703665535
UP_SEQ_FEATURE	repeat:2-2	8	0.02721180992550767	0.07060875545051637	SON, CD68, CLGN, F5, LAYN, CSTF2T, CALR, PEG3	2765	22	16021	2.106986684201874	1.0	0.9673807271455598	75.74088430378316
UP_SEQ_FEATURE	domain:FZ	8	0.02721180992550767	0.07060875545051637	COL18A1, SFRP5, FZD9, FZD10, SFRP2, FZD1, FZD5, FRZB	2765	22	16021	2.106986684201874	1.0	0.9673807271455598	75.74088430378316
UP_SEQ_FEATURE	domain:Ricin B-type lectin	8	0.02721180992550767	0.07060875545051637	GALNT3, GALNT10, CRYBG3, GALNTL4, WBSCR17, GALNT6, GALNT11, GALNT13	2765	22	16021	2.106986684201874	1.0	0.9673807271455598	75.74088430378316
UP_SEQ_FEATURE	domain:EGF-like 9	8	0.02721180992550767	0.08699465113154804	NOTCH3, MATN2, CRB1, DNER, LRP1B, MEGF6, SLIT1, SLIT3	2765	23	16021	2.0153785674974447	1.0	0.9787960127749317	82.80319517023162
BIOCARTA	m_vipPathway:Neuropeptides VIP and PACAP inhibit the apoptosis of activated T cells	7	0.02381033368481921	0.04862843104938041	VIP, EGR3, EGR2, GNAQ, GM7308, PPP3CA, VIPR2, CALM2	209	16	1171	2.451255980861244	0.9999926041178473	0.9478508185967057	47.38471572504395
UP_SEQ_FEATURE	glycosylation site:O-linked (Xyl...) (glycosaminoglycan)	7	0.02381033368481921	0.014928909277953088	GPC4, THBD, BGN, SPOCK3, TGFBR3, DCN, SDC3	2765	13	16021	3.119961051606621	1.0	0.662107776263985	25.2441277512262
UP_SEQ_FEATURE	domain:SEC7	7	0.02381033368481921	0.014928909277953088	PSD, CYTH4, D10BWG1379E, CYTH3, PSD2, IQSEC3, IQSEC2	2765	13	16021	3.119961051606621	1.0	0.662107776263985	25.2441277512262
UP_SEQ_FEATURE	domain:EGF-like 9; calcium-binding	7	0.02381033368481921	0.022374613171637244	NOTCH2, LTBP1, FBLN2, SCUBE2, LTBP4, SCUBE1, FBN2	2765	14	16021	2.897106690777577	1.0	0.7624007469959676	35.44808077469366
UP_SEQ_FEATURE	domain:TLC	7	0.02381033368481921	0.03196120953828541	TMEM56, TRAM1L1, TMEM136, TLCD1, TLCD2, LASS1, LASS6	2765	15	16021	2.7039662447257387	1.0	0.8387806018575392	46.65078265748717
UP_SEQ_FEATURE	domain:PI-PLC X-box	7	0.02381033368481921	0.043863298942868285	PLCL2, PLCXD3, PLCE1, PLCH2, PLCH1, PLCB1, PLCXD1	2765	16	16021	2.53496835443038	1.0	0.8976127120945261	58.004360031853984
UP_SEQ_FEATURE	region of interest:Heparin-binding	7	0.02381033368481921	0.07499322596923513	FGFR1, LPL, CTGF, LIPG, FGF1, THBS2, CYR61	2765	18	16021	2.2533052039381154	1.0	0.972305123612644	77.8613268395531
UP_SEQ_FEATURE	region of interest:Catalytic subdomain A	7	0.02381033368481921	0.07499322596923513	GALNT3, GALNT10, GALNTL4, WBSCR17, GALNT6, GALNT11, GALNT13	2765	18	16021	2.2533052039381154	1.0	0.972305123612644	77.8613268395531
UP_SEQ_FEATURE	region of interest:Catalytic subdomain B	7	0.02381033368481921	0.07499322596923513	GALNT3, GALNT10, GALNTL4, WBSCR17, GALNT6, GALNT11, GALNT13	2765	18	16021	2.2533052039381154	1.0	0.972305123612644	77.8613268395531
BIOCARTA	m_nos1Pathway:Nitric Oxide Signaling Pathway	6	0.020408857444130755	0.0026096731905739367	NOS1, GRIN1, DLG4, GM7308, PPP3CA, CALM2, PRKCB	209	7	1171	4.80246069719754	0.4616793995496179	0.4616793995496179	3.3100910322096277
SP_PIR_KEYWORDS	phospholipid binding	6	0.020408857444130755	0.029199707475230298	PRKCA, PRKCQ, F5, PRKCH, PRKCD, PRKCC	2817	12	17854	3.1689740859069935	0.9999999773452266	0.19751024527874428	35.40784268962961
SP_PIR_KEYWORDS	calmodulin binding	6	0.020408857444130755	0.04142539086623981	PPP3CB, CAMK2B, PPP3CA, CAMK2A, GAP43, ADD2	2817	13	17854	2.9252068485295326	0.9999999999878157	0.24600492788503037	46.42008510618212
SP_PIR_KEYWORDS	protein phosphatase inhibitor	6	0.020408857444130755	0.0563023364636024	PHACTR1, PHACTR3, PPP1R1A, PPP1R10, PPP1R14C, PPP1R14A	2817	14	17854	2.7162635022059947	0.9999999999999989	0.3013197873675211	57.45858450598747
SP_PIR_KEYWORDS	heparan sulfate	6	0.020408857444130755	0.09400438333346027	GPC4, GPC3, NRP1, SPOCK3, SDC2, SDC3	2817	16	17854	2.3767305644302454	1.0	0.4189767239415484	76.68390316709352
UP_SEQ_FEATURE	domain:PIPK	6	0.020408857444130755	0.005373702255454128	PIP5KL1, PIP5K1B, PIP5K1C, PIP5K1A, PIP4K2C, PIP4K2B	2765	8	16021	4.3456600361663655	0.9999999999999788	0.4417913086928794	9.897487104972258
UP_SEQ_FEATURE	repeat:Spectrin 5	6	0.020408857444130755	0.01038061527853631	MACF1, DMD, SPNB1, TRIO, DST, KALRN	2765	9	16021	3.862808921036769	1.0	0.5763068046578864	18.277304928468563
UP_SEQ_FEATURE	domain:EGF-like 10; calcium-binding	6	0.020408857444130755	0.028130318213375992	NOTCH3, LTBP1, FBLN2, LTBP4, DNER, FBN2	2765	11	16021	3.160480026302811	1.0	0.8080861252273084	42.415438946377
UP_SEQ_FEATURE	domain:CUB 3	6	0.020408857444130755	0.041513976983882137	BMP1, CUBN, CSMD3, SEZ6L, SEZ6, CSMD1	2765	12	16021	2.897106690777577	1.0	0.8883552302271704	55.962814637702444
UP_SEQ_FEATURE	domain:MAM	6	0.020408857444130755	0.0581296442989049	NRP2, PTPRK, PTPRM, NRP1, NPNT, MDGA1	2765	13	16021	2.6742523299485326	1.0	0.9432003590818494	68.6008071383627
UP_SEQ_FEATURE	short sequence motif:TXY	6	0.020408857444130755	0.0581296442989049	MAPK1, MAPK6, NLK, MAPK14, MAPK10, MAPK7	2765	13	16021	2.6742523299485326	1.0	0.9432003590818494	68.6008071383627
UP_SEQ_FEATURE	domain:EGF-like 11; calcium-binding	6	0.020408857444130755	0.07799355048173326	NOTCH3, NOTCH2, LTBP1, FBLN2, LTBP4, FBN2	2765	14	16021	2.4832343063807802	1.0	0.9740027688668849	79.20973903589574
BIOCARTA	m_egfr_smrtePathway:Map Kinase Inactivation of SMRT Corepressor	5	0.017007381203442293	0.05826057232344353	MAP2K1, THRB, MAPK14, RARA, NCOR2	209	9	1171	3.1127060074428496	0.9999993368854709	0.9418810568047379	53.84890145961205
BIOCARTA	m_actinYPathway:Y branching of actin filaments	5	0.017007381203442293	0.08396925822969514	ACTA1, NTRK1, ABI2, WASL, NCKAP1	209	10	1171	2.8014354066985647	0.9999999990609655	0.925597900008669	67.69021047137493
COG_ONTOLOGY	Lipid metabolism / General function prediction only	5	0.017007381203442293	0.025482745972410546	DGKB, CERKL, DGKG, DGKZ, CERK	283	9	2040	4.004711425206125	0.6152198023407969	0.6152198023407969	20.68789676435101
SP_PIR_KEYWORDS	phorbol ester binding	5	0.017007381203442293	0.02536177359618715	PRKCA, PRKCQ, PRKCH, PRKCD, PRKCC	2817	8	17854	3.961217607383742	0.9999997639500613	0.19339292568818034	31.537507839828738
SP_PIR_KEYWORDS	carbon-carbon lyase	5	0.017007381203442293	0.040041248958692606	GAD2, NANS, ALDOC, HDC, AMD1	2817	9	17854	3.5210823176744377	0.9999999999712904	0.24346694984511097	45.26760551870244
SP_PIR_KEYWORDS	camp biosynthesis	5	0.017007381203442293	0.05859069304471234	ADCY1, ADCY2, ADCY9, ADCY7, ADCY8	2817	10	17854	3.1689740859069935	0.9999999999999998	0.30908117366062793	58.95495090428856
SP_PIR_KEYWORDS	thiolester bond	5	0.017007381203442293	0.08091394243277214	C3, DRD2, SFTPC, GNAS, GAP43	2817	11	17854	2.880885532642721	1.0	0.38239983833223723	71.19002522810005
UP_SEQ_FEATURE	repeat:37	5	0.017007381203442293	0.0038120996080784767	PRX, PRG4, RRBP1, NEFH, POLR2A	2765	5	16021	5.794213381555154	0.9999999997967657	0.39781878543122284	7.121422101584008
UP_SEQ_FEATURE	repeat:33	5	0.017007381203442293	0.009870189281983065	PRX, PRG4, RRBP1, NEFH, POLR2A	2765	6	16021	4.828511151295961	1.0	0.5630653657200257	17.458124119196295
UP_SEQ_FEATURE	repeat:34	5	0.017007381203442293	0.009870189281983065	PRX, PRG4, RRBP1, NEFH, POLR2A	2765	6	16021	4.828511151295961	1.0	0.5630653657200257	17.458124119196295
UP_SEQ_FEATURE	domain:F5/8 type C 1	5	0.017007381203442293	0.009870189281983065	NRP2, NRP1, F5, MFGE8, EDIL3	2765	6	16021	4.828511151295961	1.0	0.5630653657200257	17.458124119196295
UP_SEQ_FEATURE	repeat:35	5	0.017007381203442293	0.009870189281983065	PRX, PRG4, RRBP1, NEFH, POLR2A	2765	6	16021	4.828511151295961	1.0	0.5630653657200257	17.458124119196295
UP_SEQ_FEATURE	repeat:36	5	0.017007381203442293	0.009870189281983065	PRX, PRG4, RRBP1, NEFH, POLR2A	2765	6	16021	4.828511151295961	1.0	0.5630653657200257	17.458124119196295
UP_SEQ_FEATURE	domain:F5/8 type C 2	5	0.017007381203442293	0.009870189281983065	NRP2, NRP1, F5, MFGE8, EDIL3	2765	6	16021	4.828511151295961	1.0	0.5630653657200257	17.458124119196295
UP_SEQ_FEATURE	repeat:32	5	0.017007381203442293	0.019898285269759043	PRX, PRG4, RRBP1, NEFH, POLR2A	2765	7	16021	4.138723843967966	1.0	0.7287913128186911	32.21079338864
UP_SEQ_FEATURE	domain:Laminin G-like	5	0.017007381203442293	0.019898285269759043	FAT3, COL27A1, SLIT1, COL5A1, SLIT3	2765	7	16021	4.138723843967966	1.0	0.7287913128186911	32.21079338864
UP_SEQ_FEATURE	repeat:Spectrin 6	5	0.017007381203442293	0.03442286828528096	MACF1, DMD, SPNB1, TRIO, DST	2765	8	16021	3.621383363471971	1.0	0.8523427057213966	49.21457112771236
UP_SEQ_FEATURE	repeat:30	5	0.017007381203442293	0.03442286828528096	PRX, PRG4, RRBP1, NEFH, POLR2A	2765	8	16021	3.621383363471971	1.0	0.8523427057213966	49.21457112771236
UP_SEQ_FEATURE	repeat:31	5	0.017007381203442293	0.03442286828528096	PRX, PRG4, RRBP1, NEFH, POLR2A	2765	8	16021	3.621383363471971	1.0	0.8523427057213966	49.21457112771236
UP_SEQ_FEATURE	repeat:29	5	0.017007381203442293	0.053656670690398485	PRX, PRG4, RRBP1, NEFH, POLR2A	2765	9	16021	3.2190074341973074	1.0	0.9333235792169725	65.58736385102642
UP_SEQ_FEATURE	domain:EGF-like 16; calcium-binding	5	0.017007381203442293	0.053656670690398485	NOTCH3, NOTCH2, LTBP1, CRB1, FBN2	2765	9	16021	3.2190074341973074	1.0	0.9333235792169725	65.58736385102642
UP_SEQ_FEATURE	domain:EGF-like 13; calcium-binding	5	0.017007381203442293	0.053656670690398485	NOTCH3, NOTCH2, LTBP1, LTBP4, FBN2	2765	9	16021	3.2190074341973074	1.0	0.9333235792169725	65.58736385102642
UP_SEQ_FEATURE	domain:EGF-like 14; calcium-binding	5	0.017007381203442293	0.07753435768699546	NOTCH3, NOTCH2, LTBP1, LTBP4, FBN2	2765	10	16021	2.897106690777577	1.0	0.9741515660851293	79.00854144127501
UP_SEQ_FEATURE	domain:DAGKc	5	0.017007381203442293	0.07753435768699546	DGKB, DGKG, DGKZ, CERK, AGK	2765	10	16021	2.897106690777577	1.0	0.9741515660851293	79.00854144127501
UP_SEQ_FEATURE	repeat:24	5	0.017007381203442293	0.07753435768699546	PRX, PRG4, RRBP1, NEFH, POLR2A	2765	10	16021	2.897106690777577	1.0	0.9741515660851293	79.00854144127501
UP_SEQ_FEATURE	repeat:28	5	0.017007381203442293	0.07753435768699546	PRX, PRG4, RRBP1, NEFH, POLR2A	2765	10	16021	2.897106690777577	1.0	0.9741515660851293	79.00854144127501
SP_PIR_KEYWORDS	neurotransmitter	4	0.013605904962753835	0.030519130010109207	PNOC, SYT2, TAC1, CARTPT	2817	5	17854	5.070358537451189	0.9999999899002441	0.20331289351952575	36.69058990563616
SP_PIR_KEYWORDS	Neurotransmitter biosynthesis	4	0.013605904962753835	0.030519130010109207	GAD2, TH, SLC5A7, CHAT	2817	5	17854	5.070358537451189	0.9999999899002441	0.20331289351952575	36.69058990563616
SP_PIR_KEYWORDS	chondroitin sulfate proteoglycan	4	0.013605904962753835	0.053954427261217505	COL18A1, GPC4, BGN, ITGB4	2817	6	17854	4.225298781209324	0.9999999999999951	0.29565618583871034	55.870535877821915
UP_SEQ_FEATURE	repeat:44	4	0.013605904962753835	0.01786879851640081	PRX, RRBP1, NEFH, POLR2A	2765	4	16021	5.794213381555154	1.0	0.7146914836388512	29.44346610662135
UP_SEQ_FEATURE	repeat:42	4	0.013605904962753835	0.01786879851640081	PRX, RRBP1, NEFH, POLR2A	2765	4	16021	5.794213381555154	1.0	0.7146914836388512	29.44346610662135
UP_SEQ_FEATURE	repeat:39	4	0.013605904962753835	0.01786879851640081	PRX, RRBP1, NEFH, POLR2A	2765	4	16021	5.794213381555154	1.0	0.7146914836388512	29.44346610662135
UP_SEQ_FEATURE	repeat:40	4	0.013605904962753835	0.01786879851640081	PRX, RRBP1, NEFH, POLR2A	2765	4	16021	5.794213381555154	1.0	0.7146914836388512	29.44346610662135
UP_SEQ_FEATURE	repeat:38	4	0.013605904962753835	0.01786879851640081	PRX, RRBP1, NEFH, POLR2A	2765	4	16021	5.794213381555154	1.0	0.7146914836388512	29.44346610662135
UP_SEQ_FEATURE	repeat:41	4	0.013605904962753835	0.01786879851640081	PRX, RRBP1, NEFH, POLR2A	2765	4	16021	5.794213381555154	1.0	0.7146914836388512	29.44346610662135
UP_SEQ_FEATURE	region of interest:Inhibitory domain	4	0.013605904962753835	0.01786879851640081	PPP3CB, PPP3CA, CAMK2N2, CAMK2N1	2765	4	16021	5.794213381555154	1.0	0.7146914836388512	29.44346610662135
UP_SEQ_FEATURE	repeat:45	4	0.013605904962753835	0.01786879851640081	PRX, RRBP1, NEFH, POLR2A	2765	4	16021	5.794213381555154	1.0	0.7146914836388512	29.44346610662135
UP_SEQ_FEATURE	region of interest:Autoinhibitory domain	4	0.013605904962753835	0.06803750447676649	CAMK1, CAMKK1, CAMKK2, CAMK1D	2765	6	16021	3.862808921036769	1.0	0.9638569605265941	74.40922367286976
UP_SEQ_FEATURE	repeat:RPEL 2	4	0.013605904962753835	0.06803750447676649	PHACTR1, PHACTR3, MKL2, MKL1	2765	6	16021	3.862808921036769	1.0	0.9638569605265941	74.40922367286976
UP_SEQ_FEATURE	region of interest:Triple-helical region 3 (COL3)	4	0.013605904962753835	0.06803750447676649	COL18A1, COL19A1, COL15A1, COL16A1	2765	6	16021	3.862808921036769	1.0	0.9638569605265941	74.40922367286976
UP_SEQ_FEATURE	repeat:BNR 5	4	0.013605904962753835	0.06803750447676649	SORL1, SORT1, SORCS1, RELN	2765	6	16021	3.862808921036769	1.0	0.9638569605265941	74.40922367286976
UP_SEQ_FEATURE	repeat:RPEL 3	4	0.013605904962753835	0.06803750447676649	PHACTR1, PHACTR3, MKL2, MKL1	2765	6	16021	3.862808921036769	1.0	0.9638569605265941	74.40922367286976
UP_SEQ_FEATURE	repeat:RPEL 1	4	0.013605904962753835	0.06803750447676649	PHACTR1, PHACTR3, MKL2, MKL1	2765	6	16021	3.862808921036769	1.0	0.9638569605265941	74.40922367286976
SP_PIR_KEYWORDS	myelin	3	0.010204428722065378	0.06676775021955925	CNP, MOG, MBP	2817	3	17854	6.337948171813987	1.0	0.34218909772123396	63.91050644890577
UP_SEQ_FEATURE	repeat:46	3	0.010204428722065378	0.07900551459559592	RRBP1, NEFH, POLR2A	2765	3	16021	5.794213381555154	1.0	0.9731015033282224	79.64669935615717
UP_SEQ_FEATURE	domain:CUB 14	3	0.010204428722065378	0.07900551459559592	CUBN, CSMD3, CSMD1	2765	3	16021	5.794213381555154	1.0	0.9731015033282224	79.64669935615717
UP_SEQ_FEATURE	domain:CUB 10	3	0.010204428722065378	0.07900551459559592	CUBN, CSMD3, CSMD1	2765	3	16021	5.794213381555154	1.0	0.9731015033282224	79.64669935615717
UP_SEQ_FEATURE	repeat:50	3	0.010204428722065378	0.07900551459559592	RRBP1, NEFH, POLR2A	2765	3	16021	5.794213381555154	1.0	0.9731015033282224	79.64669935615717
UP_SEQ_FEATURE	domain:CUB 13	3	0.010204428722065378	0.07900551459559592	CUBN, CSMD3, CSMD1	2765	3	16021	5.794213381555154	1.0	0.9731015033282224	79.64669935615717
UP_SEQ_FEATURE	domain:CUB 8	3	0.010204428722065378	0.07900551459559592	CUBN, CSMD3, CSMD1	2765	3	16021	5.794213381555154	1.0	0.9731015033282224	79.64669935615717
UP_SEQ_FEATURE	repeat:43	3	0.010204428722065378	0.07900551459559592	PRX, RRBP1, POLR2A	2765	3	16021	5.794213381555154	1.0	0.9731015033282224	79.64669935615717
UP_SEQ_FEATURE	region of interest:Triple-helical region 5 (COL5)	3	0.010204428722065378	0.07900551459559592	COL18A1, COL19A1, COL15A1	2765	3	16021	5.794213381555154	1.0	0.9731015033282224	79.64669935615717
UP_SEQ_FEATURE	domain:CUB 7	3	0.010204428722065378	0.07900551459559592	CUBN, CSMD3, CSMD1	2765	3	16021	5.794213381555154	1.0	0.9731015033282224	79.64669935615717
UP_SEQ_FEATURE	region of interest:Nonhelical region 8 (NC8)	3	0.010204428722065378	0.07900551459559592	COL18A1, COL15A1, COL16A1	2765	3	16021	5.794213381555154	1.0	0.9731015033282224	79.64669935615717
UP_SEQ_FEATURE	repeat:49	3	0.010204428722065378	0.07900551459559592	RRBP1, NEFH, POLR2A	2765	3	16021	5.794213381555154	1.0	0.9731015033282224	79.64669935615717
UP_SEQ_FEATURE	domain:ABM	3	0.010204428722065378	0.07900551459559592	NECAB3, NECAB2, NECAB1	2765	3	16021	5.794213381555154	1.0	0.9731015033282224	79.64669935615717
UP_SEQ_FEATURE	region of interest:Nonhelical region 7 (NC7)	3	0.010204428722065378	0.07900551459559592	COL18A1, COL15A1, COL16A1	2765	3	16021	5.794213381555154	1.0	0.9731015033282224	79.64669935615717
UP_SEQ_FEATURE	domain:CUB 12	3	0.010204428722065378	0.07900551459559592	CUBN, CSMD3, CSMD1	2765	3	16021	5.794213381555154	1.0	0.9731015033282224	79.64669935615717
UP_SEQ_FEATURE	region of interest:Nonhelical region 6 (NC6)	3	0.010204428722065378	0.07900551459559592	COL18A1, COL15A1, COL16A1	2765	3	16021	5.794213381555154	1.0	0.9731015033282224	79.64669935615717
UP_SEQ_FEATURE	domain:CUB 6	3	0.010204428722065378	0.07900551459559592	CUBN, CSMD3, CSMD1	2765	3	16021	5.794213381555154	1.0	0.9731015033282224	79.64669935615717
UP_SEQ_FEATURE	repeat:48	3	0.010204428722065378	0.07900551459559592	RRBP1, NEFH, POLR2A	2765	3	16021	5.794213381555154	1.0	0.9731015033282224	79.64669935615717
UP_SEQ_FEATURE	region of interest:Nonhelical region 5 (NC5)	3	0.010204428722065378	0.07900551459559592	COL18A1, COL15A1, COL16A1	2765	3	16021	5.794213381555154	1.0	0.9731015033282224	79.64669935615717
UP_SEQ_FEATURE	repeat:47	3	0.010204428722065378	0.07900551459559592	RRBP1, NEFH, POLR2A	2765	3	16021	5.794213381555154	1.0	0.9731015033282224	79.64669935615717
UP_SEQ_FEATURE	region of interest:Triple-helical region 6 (COL6)	3	0.010204428722065378	0.07900551459559592	COL18A1, COL19A1, COL15A1	2765	3	16021	5.794213381555154	1.0	0.9731015033282224	79.64669935615717
UP_SEQ_FEATURE	site:Cleavage; by caspases	3	0.010204428722065378	0.07900551459559592	SATB1, BCL2, KRT20	2765	3	16021	5.794213381555154	1.0	0.9731015033282224	79.64669935615717
UP_SEQ_FEATURE	domain:CUB 11	3	0.010204428722065378	0.07900551459559592	CUBN, CSMD3, CSMD1	2765	3	16021	5.794213381555154	1.0	0.9731015033282224	79.64669935615717
UP_SEQ_FEATURE	domain:CUB 9	3	0.010204428722065378	0.07900551459559592	CUBN, CSMD3, CSMD1	2765	3	16021	5.794213381555154	1.0	0.9731015033282224	79.64669935615717
