# Supplementary material for: Changes in C57BL6 Mouse Hippocampal Transcriptome Induced by Hypergravity Mimic Acute Corticosterone-Induced Stress
Source: Front Mol Neurosci. 2016 Dec 26;9:153. doi: 10.3389/fnmol.2016.00153 (PMC5183579; doi:10.3389/fnmol.2016.00153)
Supplement: Supplementary file 2 [file Table2.XLSX]

## Sheet: 1G vs AGE
test_id	gene_id	gene	locus	sample_1	sample_2	status	value_1	value_2	log2(fold_change)	test_stat	p_value	q_value	significant
XLOC_000003	XLOC_000003	Oprk1	1:5578541-5596210	FVA	AG1	OK	4.23884	0.283478	-3.90236	7.87054	3.55271e-15	2.05951e-13	yes
XLOC_000006	XLOC_000006	Pcmtd1	1:7079134-7163710	FVA	AG1	OK	18.4887	24.6004	0.412037	-3.12656	0.00176864	0.0171094	yes
XLOC_000010	XLOC_000010	3110035E14Rik	1:9591146-9617227	FVA	AG1	OK	6.7364	72.4163	3.42626	-22.2972	0	0	yes
XLOC_000015	XLOC_000015	A830018L16Rik	1:11404191-11819970	FVA	AG1	OK	0.801341	2.13482	1.41363	-3.48298	0.000495871	0.00574697	yes
XLOC_000016	XLOC_000016	Sulf1	1:12682400-12851259	FVA	AG1	OK	3.6687	2.06912	-0.826247	3.19457	0.00140037	0.0140711	yes
XLOC_000028	XLOC_000028	Crispld1	1:17717430-17761411	FVA	AG1	OK	0.32257	0.997285	1.62839	-6.3548	2.08699e-10	7.59526e-09	yes
XLOC_000029	XLOC_000029	Tcfap2d	1:19138391-19156477	FVA	AG1	OK	0.763355	0	-1.79769e+308	-1.79769e+308	0.00400142	0.0330843	yes
XLOC_000035	XLOC_000035	Gm16705	1:21951729-21952734	FVA	AG1	OK	5.80529	45.5538	2.97213	-3.62335	0.00029081	0.0036217	yes
XLOC_000037	XLOC_000037	-	1:23581170-23604456	FVA	AG1	OK	1.58159	0	-1.79769e+308	-1.79769e+308	1.49887e-05	0.000253904	yes
XLOC_000039	XLOC_000039	Col19a1	1:24264521-24594427	FVA	AG1	OK	0	2.65746	1.79769e+308	1.79769e+308	5.32677e-18	3.45045e-16	yes
XLOC_000047	XLOC_000047	Dst	1:34308538-34365632	FVA	AG1	OK	23.0668	0.400454	-5.84804	12.1347	0	0	yes
XLOC_000052	XLOC_000052	Plekhb2	1:34906683-34936638	FVA	AG1	OK	75.4861	53.2373	-0.503775	4.11834	3.81616e-05	0.000594613	yes
XLOC_000060	XLOC_000060	Vwa3b	1:37142133-37244453	FVA	AG1	OK	1.24229	5.58711	2.1691	-5.98043	2.22544e-09	7.15522e-08	yes
XLOC_000070	XLOC_000070	D930019O06Rik	1:39712044-39714447	FVA	AG1	OK	0.207455	0.707757	1.77045	-3.79318	0.000148731	0.00199978	yes
XLOC_000072	XLOC_000072	Il1r1	1:40323561-40373042	FVA	AG1	OK	1.107	3.63246	1.7143	-6.31635	2.67806e-10	9.55504e-09	yes
XLOC_000073	XLOC_000073	Slc9a4	1:40636811-40687840	FVA	AG1	OK	0.222193	5.62873	4.66292	-7.21186	5.52003e-13	2.63207e-11	yes
XLOC_000074	XLOC_000074	Slc9a2	1:40738489-40826188	FVA	AG1	OK	0.713458	8.72096	3.61159	-14.9666	0	0	yes
XLOC_000075	XLOC_000075	-	1:42318731-42361771	FVA	AG1	OK	0.298465	1.95283	2.70994	-4.30688	1.65571e-05	0.000277864	yes
XLOC_000076	XLOC_000076	Pou3f3	1:42700738-42754308	FVA	AG1	OK	12.5616	22.9021	0.866463	-4.52908	5.92422e-06	0.000109281	yes
XLOC_000082	XLOC_000082	Nck2	1:43610622-43627451	FVA	AG1	OK	11.2381	25.5476	1.18478	-2.97304	0.00294861	0.0258405	yes
XLOC_000083	XLOC_000083	1500015O10Rik	1:43787414-43799794	FVA	AG1	OK	2.89623	5.16602	0.834877	-3.24254	0.00118469	0.0122518	yes
XLOC_000088	XLOC_000088	Gulp1	1:44608420-44853666	FVA	AG1	OK	1.73804	0.808033	-1.10497	4.08746	4.36126e-05	0.000672762	yes
XLOC_000091	XLOC_000091	Dnahc7b	1:46329304-46430477	FVA	AG1	OK	1.43801	0.0397549	-5.17679	2.98379	0.00284698	0.0251691	yes
XLOC_000134	XLOC_000134	Abi2	1:60466452-60538916	FVA	AG1	OK	13.0044	27.7759	1.09484	-7.26588	3.70592e-13	1.78915e-11	yes
XLOC_000137	XLOC_000137	Nrp2	1:62749866-62865263	FVA	AG1	OK	9.2599	14.4619	0.64319	-3.97703	6.97809e-05	0.00101463	yes
XLOC_000140	XLOC_000140	Zdbf2	1:63319921-63355797	FVA	AG1	OK	5.58558	3.9821	-0.488178	3.00016	0.00269841	0.0240483	yes
XLOC_000152	XLOC_000152	Vwc2l	1:70797507-70932299	FVA	AG1	OK	4.33551	1.26994	-1.77144	4.17045	3.03997e-05	0.000484137	yes
XLOC_000159	XLOC_000159	Igfbp2	1:72871044-72899041	FVA	AG1	OK	10.6192	16.0967	0.600096	-3.28078	0.0010352	0.0108573	yes
XLOC_000161	XLOC_000161	Arpc2	1:74283104-74314784	FVA	AG1	OK	73.1652	158.289	1.11333	-7.63683	2.22045e-14	1.19525e-12	yes
XLOC_000166	XLOC_000166	Vil1	1:74470163-74478930	FVA	AG1	OK	1.09461	0.184394	-2.56955	3.81041	0.000138737	0.00187765	yes
XLOC_000172	XLOC_000172	Cyp27a1	1:74759719-74784443	FVA	AG1	OK	6.71782	1.65015	-2.02539	6.82606	8.72769e-12	3.69915e-10	yes
XLOC_000174	XLOC_000174	Cdk5r2	1:74901572-74904521	FVA	AG1	OK	36.092	55.1099	0.610633	-4.81807	1.44953e-06	2.98783e-05	yes
XLOC_000179	XLOC_000179	Dnajb2	1:75232982-75242432	FVA	AG1	OK	44.5844	30.0456	-0.569389	3.75283	0.000174849	0.00232066	yes
XLOC_000181	XLOC_000181	Speg	1:75378671-75428898	FVA	AG1	OK	7.60472	20.9715	1.46346	-6.25255	4.03817e-10	1.41625e-08	yes
XLOC_000183	XLOC_000183	Tmem198	1:75470067-75506946	FVA	AG1	OK	3.46337	7.36545	1.0886	-4.55271	5.29596e-06	9.86346e-05	yes
XLOC_000187	XLOC_000187	Sgpp2	1:78306444-78485438	FVA	AG1	OK	13.3508	2.25758	-2.56407	15.1361	0	0	yes
XLOC_000189	XLOC_000189	Acsl3	1:78654441-78704316	FVA	AG1	OK	63.6968	44.0275	-0.532815	3.86321	0.000111905	0.00154982	yes
XLOC_000190	XLOC_000190	Kcne4	1:78814276-78816562	FVA	AG1	OK	1.33342	0.366667	-1.86259	4.88459	1.03644e-06	2.19193e-05	yes
XLOC_000197	XLOC_000197	Agfg1	1:82836260-82897674	FVA	AG1	OK	17.4046	12.7465	-0.449365	3.02662	0.00247301	0.0224145	yes
XLOC_000204	XLOC_000204	2810459M11Rik	1:87942819-87956966	FVA	AG1	OK	1.25541	2.19199	0.804082	-3.96484	7.34443e-05	0.00106041	yes
XLOC_000208	XLOC_000208	Ptma	1:88423023-88425901	FVA	AG1	OK	11.3896	16.4373	0.529259	-3.52514	0.000423264	0.00500497	yes
XLOC_000212	XLOC_000212	Efhd1	1:89160889-89207414	FVA	AG1	OK	15.6019	8.86047	-0.816268	4.85282	1.21721e-06	2.52921e-05	yes
XLOC_000224	XLOC_000224	Cxcr7	1:92100494-92112300	FVA	AG1	OK	4.46893	7.41364	0.730252	-3.70733	0.000209459	0.00272156	yes
XLOC_000228	XLOC_000228	Ramp1	1:93076623-93121825	FVA	AG1	OK	13.176	19.4749	0.563708	-3.72346	0.000196508	0.0025684	yes
XLOC_000235	XLOC_000235	Hdac4	1:93825321-94076622	FVA	AG1	OK	0	1.24973	1.79769e+308	1.79769e+308	1.89825e-05	0.000314657	yes
XLOC_000241	XLOC_000241	-	1:95081616-95087242	FVA	AG1	OK	2.0327	0.369156	-2.46109	3.32303	0.000890452	0.00954656	yes
XLOC_000243	XLOC_000243	-	1:95090038-95099460	FVA	AG1	OK	1.27674	0.445668	-1.51842	3.12093	0.00180278	0.0173635	yes
XLOC_000244	XLOC_000244	E030010N08Rik	1:95123185-95127610	FVA	AG1	OK	1.11223	0.344582	-1.69053	4.59535	4.32021e-06	8.17428e-05	yes
XLOC_000261	XLOC_000261	Cdh20	1:106664913-106892054	FVA	AG1	OK	6.05114	4.35569	-0.474307	2.85751	0.00426977	0.0348829	yes
XLOC_000269	XLOC_000269	Cdh7	1:111879239-112037641	FVA	AG1	OK	4.05683	1.17686	-1.78541	7.08381	1.40243e-12	6.41961e-11	yes
XLOC_000271	XLOC_000271	Mki67ip	1:120218414-120230457	FVA	AG1	OK	7.67599	11.3812	0.568224	-3.19359	0.00140513	0.0141144	yes
XLOC_000275	XLOC_000275	Epb4.1l5	1:121496774-121734176	FVA	AG1	OK	12.4473	7.14781	-0.800255	3.76297	0.000167907	0.00223621	yes
XLOC_000277	XLOC_000277	C1ql2	1:122236780-122241642	FVA	AG1	OK	4.66392	16.8697	1.85482	-11.1479	0	0	yes
XLOC_000281	XLOC_000281	Gm10543	1:125942923-125943997	FVA	AG1	OK	0.845944	0.156914	-2.43059	3.00302	0.00267312	0.023885	yes
XLOC_000282	XLOC_000282	Actr3	1:127312650-127350407	FVA	AG1	OK	29.4888	71.7133	1.28208	-4.30207	1.6921e-05	0.000283682	yes
XLOC_000284	XLOC_000284	Nckap5	1:127960781-127961570	FVA	AG1	OK	0	0.648405	1.79769e+308	1.79769e+308	0.00370541	0.0312131	yes
XLOC_000285	XLOC_000285	Nckap5	1:127961671-128020679	FVA	AG1	OK	0.14504	2.27481	3.97123	-3.97869	6.92955e-05	0.001009	yes
XLOC_000290	XLOC_000290	R3hdm1	1:129999889-130134373	FVA	AG1	OK	32.2023	56.5365	0.812017	-5.62714	1.83217e-08	5.17462e-07	yes
XLOC_000305	XLOC_000305	Nucks1	1:133806997-133832922	FVA	AG1	OK	12.488	18.5179	0.568371	-3.52383	0.000425354	0.00502776	yes
XLOC_000309	XLOC_000309	Lemd1	1:134124670-134153908	FVA	AG1	OK	2.81304	0.157925	-4.15482	2.96344	0.00304221	0.0264784	yes
XLOC_000310	XLOC_000310	Klhdc8a	1:134195568-134202370	FVA	AG1	OK	13.2901	2.65744	-2.32224	12.342	0	0	yes
XLOC_000314	XLOC_000314	Lrrn2	1:134776584-134840366	FVA	AG1	OK	34.7442	53.6658	0.627231	-4.96011	7.04527e-07	1.53407e-05	yes
XLOC_000317	XLOC_000317	Plekha6	1:135077749-135200009	FVA	AG1	OK	26.9765	14.4888	-0.896766	5.24951	1.52507e-07	3.73092e-06	yes
XLOC_000318	XLOC_000318	Etnk2	1:135260114-135276984	FVA	AG1	OK	4.63893	1.04621	-2.14862	4.60893	4.04739e-06	7.71476e-05	yes
XLOC_000320	XLOC_000320	Fmod	1:135933969-135944800	FVA	AG1	OK	1.01809	3.52446	1.79154	-7.0416	1.90048e-12	8.59751e-11	yes
XLOC_000321	XLOC_000321	Chi3l1	1:136078719-136086609	FVA	AG1	OK	8.68435	3.92831	-1.14451	3.91137	9.17732e-05	0.00129776	yes
XLOC_000326	XLOC_000326	Kdm5b	1:136456745-136529750	FVA	AG1	OK	8.11439	11.7208	0.530516	-3.02225	0.00250904	0.0226746	yes
XLOC_000327	XLOC_000327	Syt2	1:136543287-136649805	FVA	AG1	OK	11.943	4.39307	-1.44287	8.90368	0	0	yes
XLOC_000332	XLOC_000332	Nav1	1:137331162-137584629	FVA	AG1	OK	0.184593	6.3587	5.10632	-3.08563	0.00203122	0.019146	yes
XLOC_000333	XLOC_000333	Csrp1	1:137625667-137648810	FVA	AG1	OK	145.185	96.1453	-0.594601	4.85101	1.22836e-06	2.55067e-05	yes
XLOC_000334	XLOC_000334	Phlda3	1:137662676-137665746	FVA	AG1	OK	15.9398	6.82168	-1.22443	6.67851	2.41378e-11	9.85218e-10	yes
XLOC_000335	XLOC_000335	Tnni1	1:137679560-137699192	FVA	AG1	OK	4.0166	1.7123	-1.23004	3.96203	7.43152e-05	0.00107098	yes
XLOC_000337	XLOC_000337	Tnnt2	1:137740361-137748837	FVA	AG1	OK	2.59867	0.852616	-1.60781	3.16143	0.00156997	0.0154487	yes
XLOC_000353	XLOC_000353	Fam5c	1:148342728-148749668	FVA	AG1	OK	7.63784	3.58695	-1.09041	4.60232	4.17801e-06	7.93925e-05	yes
XLOC_000354	XLOC_000354	Ptgs2	1:151946957-151955334	FVA	AG1	OK	0.654706	5.29322	3.01522	-11.8611	0	0	yes
XLOC_000362	XLOC_000362	Arpc5	1:154613648-154622713	FVA	AG1	OK	27.9238	71.4729	1.3559	-9.98354	0	0	yes
XLOC_000364	XLOC_000364	Nmnat2	1:154801955-154967163	FVA	AG1	OK	36.6871	26.3998	-0.474743	3.86593	0.000110666	0.0015361	yes
XLOC_000368	XLOC_000368	Rgs16	1:155587388-155592662	FVA	AG1	OK	51.0899	2.71066	-4.23633	25.0448	0	0	yes
XLOC_000372	XLOC_000372	Stx6	1:157005772-157052935	FVA	AG1	OK	9.43074	17.3912	0.882916	-5.9116	3.38798e-09	1.05953e-07	yes
XLOC_000378	XLOC_000378	BC026585	1:159388699-159418889	FVA	AG1	OK	13.2642	5.41236	-1.29321	3.73665	0.000186486	0.00246136	yes
XLOC_000382	XLOC_000382	Tnr	1:161453851-161862026	FVA	AG1	OK	12.8648	6.70303	-0.940544	6.03173	1.62212e-09	5.32629e-08	yes
XLOC_000386	XLOC_000386	Serpinc1	1:162932967-162968713	FVA	AG1	OK	1.48096	0.680753	-1.12133	3.73056	0.000191057	0.00250777	yes
XLOC_000392	XLOC_000392	Myoc	1:164569165-164579995	FVA	AG1	OK	5.67208	8.88368	0.647279	-3.40067	0.000672213	0.0074874	yes
XLOC_000397	XLOC_000397	F5	1:166081948-166150560	FVA	AG1	OK	0.218037	1.0894	2.32089	-5.08009	3.77261e-07	8.60267e-06	yes
XLOC_000403	XLOC_000403	Gpr161	1:167211441-167256987	FVA	AG1	OK	2.30463	14.003	2.60313	-12.7925	0	0	yes
XLOC_000406	XLOC_000406	Creg1	1:167693875-167705440	FVA	AG1	OK	20.8337	8.40957	-1.30881	8.40709	0	0	yes
XLOC_000408	XLOC_000408	Ildr2	1:168184434-168248335	FVA	AG1	OK	35.5682	15.7246	-1.17757	6.36538	1.94807e-10	7.11484e-09	yes
XLOC_000410	XLOC_000410	Fam78b	1:168931668-169021261	FVA	AG1	OK	3.77253	7.33954	0.960158	-4.19749	2.69886e-05	0.000433192	yes
XLOC_000412	XLOC_000412	Aldh9a1	1:169280097-169298661	FVA	AG1	OK	15.4284	9.97184	-0.629659	3.61445	0.000300987	0.00372741	yes
XLOC_000415	XLOC_000415	Rgs5	1:171585540-171626006	FVA	AG1	OK	16.5973	21.4954	0.373076	-2.82434	0.00473782	0.037964	yes
XLOC_000416	XLOC_000416	1700084C01Rik	1:171858726-171866875	FVA	AG1	OK	7.26626	4.63002	-0.650194	3.22639	0.00125364	0.0128731	yes
XLOC_000418	XLOC_000418	Olfml2b	1:172574468-172612982	FVA	AG1	OK	2.12012	12.5745	2.56828	-12.2417	0	0	yes
XLOC_000419	XLOC_000419	1700009P17Rik	1:173053183-173057121	FVA	AG1	OK	5.66733	1.87115	-1.59875	3.08877	0.00200988	0.0189796	yes
XLOC_000421	XLOC_000421	Adamts4	1:173178688-173192394	FVA	AG1	OK	7.82551	5.97423	-0.389433	2.82828	0.00467989	0.0375778	yes
XLOC_000435	XLOC_000435	Kcnj10	1:174271284-174304376	FVA	AG1	OK	62.3296	30.6115	-1.02584	8.37199	0	0	yes
XLOC_000444	XLOC_000444	Sdccag8	1:178744967-179188702	FVA	AG1	OK	21.8508	36.0232	0.72124	-3.15239	0.00161942	0.0158495	yes
XLOC_000445	XLOC_000445	Zfp238	1:179372596-179380974	FVA	AG1	OK	25.4182	130.241	2.35726	-13.7875	0	0	yes
XLOC_000450	XLOC_000450	Efcab2	1:180320495-180420052	FVA	AG1	OK	3.20443	2.07236	-0.628791	3.20553	0.00134813	0.0136573	yes
XLOC_000453	XLOC_000453	Sccpdh	1:181598393-181617320	FVA	AG1	OK	41.638	24.1015	-0.788777	5.77315	7.78053e-09	2.31602e-07	yes
XLOC_000456	XLOC_000456	Itpkb	1:182257688-182354964	FVA	AG1	OK	11.2542	6.24371	-0.849991	5.78748	7.14486e-09	2.14124e-07	yes
XLOC_000457	XLOC_000457	Parp1	1:182499006-182531436	FVA	AG1	OK	20.1118	30.3942	0.595751	-4.12257	3.74672e-05	0.000585269	yes
XLOC_000462	XLOC_000462	Lefty2	1:182828640-182829176	FVA	AG1	OK	0.049843	0.849902	4.09183	-2.75493	0.00587039	0.0452832	yes
XLOC_000464	XLOC_000464	Lefty1	1:182851041-182868524	FVA	AG1	OK	0.426327	2.89343	2.76275	-6.24578	4.21691e-10	1.47059e-08	yes
XLOC_000465	XLOC_000465	Tmem63a	1:182872321-182905359	FVA	AG1	OK	28.0866	14.8345	-0.920921	2.71902	0.00654755	0.0495	yes
XLOC_000468	XLOC_000468	Cnih3	1:183282735-183392813	FVA	AG1	OK	7.2	12.6435	0.812332	-5.10508	3.30651e-07	7.62992e-06	yes
XLOC_000485	XLOC_000485	Ptpn14	1:191610365-191700568	FVA	AG1	OK	0.742938	2.27803	1.61647	-8.30903	0	0	yes
XLOC_000487	XLOC_000487	-	1:192239919-192243684	FVA	AG1	OK	0.950398	0	-1.79769e+308	-1.79769e+308	0.00440769	0.0358263	yes
XLOC_000488	XLOC_000488	-	1:192515037-192519237	FVA	AG1	OK	0.165131	1.05259	2.67226	-2.97228	0.00295597	0.0258808	yes
XLOC_000494	XLOC_000494	Ints7	1:193399609-193445605	FVA	AG1	OK	2.29805	4.16958	0.859493	-3.5921	0.000328023	0.00401714	yes
XLOC_000499	XLOC_000499	Gm16621	1:193920873-193961916	FVA	AG1	OK	0.595962	2.1655	1.86141	-3.76544	0.000166257	0.00221614	yes
XLOC_000501	XLOC_000501	Kcnh1	1:194014828-194334043	FVA	AG1	OK	3.00095	9.29793	1.63149	-7.55349	4.24105e-14	2.22479e-12	yes
XLOC_000507	XLOC_000507	Plxna2	1:196445957-196643075	FVA	AG1	OK	7.2626	11.3578	0.645129	-3.98736	6.68129e-05	0.00097653	yes
XLOC_000508	XLOC_000508	Cd34	1:196764992-196787713	FVA	AG1	OK	5.86829	13.5668	1.20907	-5.6763	1.37638e-08	3.93772e-07	yes
XLOC_000510	XLOC_000510	Xkr4	1:3189732-3661172	FVA	AG1	OK	10.5503	2.75548	-1.93691	3.55396	0.000379478	0.00454462	yes
XLOC_000528	XLOC_000528	Lactb2	1:13609111-13650631	FVA	AG1	OK	3.24274	1.49044	-1.12148	5.3132	1.07716e-07	2.69273e-06	yes
XLOC_000529	XLOC_000529	Eya1	1:14159027-14300187	FVA	AG1	OK	0.897655	4.0982	2.19076	-6.12283	9.19261e-10	3.10419e-08	yes
XLOC_000531	XLOC_000531	Gm106	1:15845144-15852497	FVA	AG1	OK	0.858254	0.190542	-2.1713	4.5883	4.46881e-06	8.42447e-05	yes
XLOC_000535	XLOC_000535	Ube2w	1:16558016-16609407	FVA	AG1	OK	9.90445	15.5541	0.651143	-4.51149	6.43723e-06	0.00011804	yes
XLOC_000540	XLOC_000540	Jph1	1:16954635-17087958	FVA	AG1	OK	2.95065	12.2709	2.05614	-7.88083	3.33067e-15	1.94539e-13	yes
XLOC_000545	XLOC_000545	Kcnq5	1:21388479-21583698	FVA	AG1	OK	3.23946	16.3781	2.33794	-9.47362	0	0	yes
XLOC_000552	XLOC_000552	Col19a1	1:24264521-24594427	FVA	AG1	OK	0.931374	2.10874	1.17895	-2.87033	0.0041004	0.0336863	yes
XLOC_000556	XLOC_000556	Phf3	1:30881042-30930656	FVA	AG1	OK	11.1752	15.0777	0.432121	-3.18457	0.00144969	0.0145007	yes
XLOC_000563	XLOC_000563	Bend6	1:33908894-33964586	FVA	AG1	OK	65.8997	29.3468	-1.16707	9.18024	0	0	yes
XLOC_000566	XLOC_000566	Fam123c	1:34635788-34654573	FVA	AG1	OK	4.10021	7.32712	0.837548	-4.60174	4.18967e-06	7.95651e-05	yes
XLOC_000576	XLOC_000576	6330578E17Rik	1:37473804-37486958	FVA	AG1	OK	16.7075	21.703	0.377402	-2.83722	0.00455083	0.0367228	yes
XLOC_000578	XLOC_000578	2010300C02Rik	1:37668420-37776603	FVA	AG1	OK	17.0391	86.333	2.34106	-14.4088	0	0	yes
XLOC_000579	XLOC_000579	Tsga10	1:37811434-37921900	FVA	AG1	OK	6.12352	10.0129	0.709423	-3.19682	0.00138952	0.0139802	yes
XLOC_000583	XLOC_000583	Aff3	1:38232145-38684046	FVA	AG1	OK	5.73476	8.65822	0.594337	-3.56225	0.000367685	0.00443086	yes
XLOC_000585	XLOC_000585	Chst10	1:38913772-38954971	FVA	AG1	OK	26.8923	16.5082	-0.704013	4.60962	4.03414e-06	7.69425e-05	yes
XLOC_000588	XLOC_000588	Creg2	1:39675251-39708379	FVA	AG1	OK	9.50037	28.3896	1.57931	-11.8966	0	0	yes
XLOC_000591	XLOC_000591	-	1:42645981-42687203	FVA	AG1	OK	0.128654	0.76413	2.57032	-4.88141	1.0533e-06	2.21998e-05	yes
XLOC_000595	XLOC_000595	Fhl2	1:43179907-43220815	FVA	AG1	OK	2.71131	19.2878	2.83062	-8.49544	0	0	yes
XLOC_000600	XLOC_000600	Slc39a10	1:46863575-46982649	FVA	AG1	OK	17.3501	24.9829	0.525996	-3.97244	7.11397e-05	0.00103081	yes
XLOC_000602	XLOC_000602	Obfc2a	1:51521907-51535315	FVA	AG1	OK	1.07165	2.61491	1.28693	-4.80705	1.53175e-06	3.14262e-05	yes
XLOC_000603	XLOC_000603	Myo1b	1:51806616-51972764	FVA	AG1	OK	8.27819	3.15933	-1.3897	3.38551	0.000710466	0.0078316	yes
XLOC_000608	XLOC_000608	1700019D03Rik	1:52925747-53010412	FVA	AG1	OK	1.54662	0.0840045	-4.20251	3.93735	8.23877e-05	0.00117418	yes
XLOC_000612	XLOC_000612	-	1:53754796-53763708	FVA	AG1	OK	3.20446	1.65927	-0.949534	2.72874	0.00635773	0.0483488	yes
XLOC_000614	XLOC_000614	Hecw2	1:53863717-54251409	FVA	AG1	OK	4.99993	2.42539	-1.04369	3.11336	0.00184969	0.0177545	yes
XLOC_000616	XLOC_000616	Pgap1	1:54529844-54614531	FVA	AG1	OK	6.25763	2.27392	-1.46044	10.1122	0	0	yes
XLOC_000617	XLOC_000617	Ankrd44	1:54702181-54885528	FVA	AG1	OK	3.09223	1.73121	-0.836868	3.47181	0.000516965	0.00594683	yes
XLOC_000641	XLOC_000641	Mdh1b	1:63745516-63776907	FVA	AG1	OK	1.34514	0.482429	-1.47937	3.5907	0.00032979	0.00403558	yes
XLOC_000644	XLOC_000644	Fzd5	1:64781680-64783155	FVA	AG1	OK	1.6828	0.259964	-2.69448	4.79749	1.60668e-06	3.29199e-05	yes
XLOC_000647	XLOC_000647	D630023F18Rik	1:65149615-65169751	FVA	AG1	OK	1.88521	4.92749	1.38613	-2.89655	0.00377291	0.0316437	yes
XLOC_000651	XLOC_000651	Lancl1	1:67046170-67085468	FVA	AG1	OK	18.0225	27.2664	0.597323	-4.69134	2.71427e-06	5.33836e-05	yes
XLOC_000654	XLOC_000654	Fn1	1:71632093-71699826	FVA	AG1	OK	4.34285	12.6455	1.54191	-8.21001	2.22045e-16	1.40015e-14	yes
XLOC_000655	XLOC_000655	Mreg	1:72205809-72258658	FVA	AG1	OK	4.58353	1.42637	-1.68411	7.11352	1.1311e-12	5.24753e-11	yes
XLOC_000660	XLOC_000660	Arpc2	1:74283104-74314784	FVA	AG1	OK	1.7172	4.67944	1.44628	-3.7295	0.000191864	0.00251622	yes
XLOC_000666	XLOC_000666	Ccdc108	1:74948653-74982211	FVA	AG1	OK	5.55883	2.81305	-0.982644	3.32698	0.000877913	0.00943177	yes
XLOC_000672	XLOC_000672	Ptprn	1:75243083-75260917	FVA	AG1	OK	99.2181	136.809	0.463492	-3.21901	0.00128632	0.0131388	yes
XLOC_000673	XLOC_000673	Resp18	1:75268682-75275165	FVA	AG1	OK	137.614	35.562	-1.95222	14.2631	0	0	yes
XLOC_000676	XLOC_000676	Epha4	1:77363646-77512009	FVA	AG1	OK	26.0992	55.2515	1.082	-8.58235	0	0	yes
XLOC_000678	XLOC_000678	BC035947	1:78493617-78508786	FVA	AG1	OK	2.3824	0.160142	-3.895	10.7122	0	0	yes
XLOC_000679	XLOC_000679	Scg2	1:79426127-79436791	FVA	AG1	OK	138.771	70.7859	-0.971172	7.85243	3.9968e-15	2.30828e-13	yes
XLOC_000682	XLOC_000682	Serpine2	1:79789834-79855220	FVA	AG1	OK	70.4713	42.2078	-0.739525	6.00021	1.97058e-09	6.40915e-08	yes
XLOC_000691	XLOC_000691	Dner	1:84366412-84692938	FVA	AG1	OK	46.9953	28.9411	-0.699397	5.63348	1.76607e-08	4.9925e-07	yes
XLOC_000699	XLOC_000699	-	1:89039751-89043385	FVA	AG1	OK	0.903701	0.0740055	-3.61014	2.81637	0.004857	0.0387681	yes
XLOC_000700	XLOC_000700	Ecel1	1:89044090-89052698	FVA	AG1	OK	15.2167	0.823759	-4.20729	16.6039	0	0	yes
XLOC_000701	XLOC_000701	Kcnj13	1:89223550-89347501	FVA	AG1	OK	0.0931702	0.799605	3.10135	-2.80533	0.00502644	0.0399246	yes
XLOC_000702	XLOC_000702	Ngef	1:89373317-89406903	FVA	AG1	OK	16.4899	31.9674	0.955022	-6.83763	8.05112e-12	3.43596e-10	yes
XLOC_000706	XLOC_000706	Hjurp	1:90155442-90174209	FVA	AG1	OK	23.4642	13.2674	-0.822577	4.33013	1.49023e-05	0.000252578	yes
XLOC_000708	XLOC_000708	Arl4c	1:90594798-90598895	FVA	AG1	OK	17.424	8.79581	-0.98619	7.0954	1.28986e-12	5.92184e-11	yes
XLOC_000710	XLOC_000710	Asb18	1:91847796-91864880	FVA	AG1	OK	2.16924	1.09273	-0.989259	3.32659	0.000879153	0.00943853	yes
XLOC_000712	XLOC_000712	Col6a3	1:92686118-92740602	FVA	AG1	OK	3.18678	1.11093	-1.52034	2.78425	0.0053652	0.0421388	yes
XLOC_000715	XLOC_000715	Per2	1:93312552-93355851	FVA	AG1	OK	5.65732	9.57674	0.759416	-4.26575	1.9923e-05	0.000329011	yes
XLOC_000716	XLOC_000716	Hdac4	1:93825321-94076622	FVA	AG1	OK	4.77423	7.15823	0.584334	-3.70389	0.000212319	0.00275409	yes
XLOC_000720	XLOC_000720	-	1:94609950-94627320	FVA	AG1	OK	0.227971	1.92268	3.0762	-4.07107	4.67978e-05	0.000718668	yes
XLOC_000722	XLOC_000722	Kif1a	1:94911847-94965312	FVA	AG1	OK	148.916	113.886	-0.386907	3.13894	0.00169559	0.0165061	yes
XLOC_000737	XLOC_000737	Rnf152	1:107175395-107253028	FVA	AG1	OK	8.46952	1.39037	-2.60681	10.9817	0	0	yes
XLOC_000740	XLOC_000740	Bcl2	1:108434740-108610677	FVA	AG1	OK	3.25493	1.86819	-0.800984	4.6483	3.34679e-06	6.48334e-05	yes
XLOC_000743	XLOC_000743	Cdh19	1:112784691-112874204	FVA	AG1	OK	2.94672	1.64474	-0.841245	3.90424	9.4521e-05	0.00133293	yes
XLOC_000751	XLOC_000751	Ptpn4	1:121496774-121734176	FVA	AG1	OK	21.5565	0.761462	-4.82321	17.0832	0	0	yes
XLOC_000753	XLOC_000753	Gm101	1:121819876-121822425	FVA	AG1	OK	3.15783	0.12876	-4.61618	3.81425	0.000136599	0.00185249	yes
XLOC_000761	XLOC_000761	Dpp10	1:125228405-125942660	FVA	AG1	OK	24.3423	7.84286	-1.63401	9.76938	0	0	yes
XLOC_000762	XLOC_000762	Actr3	1:127312650-127350407	FVA	AG1	OK	18.6916	41.0588	1.1353	-7.75313	8.88178e-15	4.9536e-13	yes
XLOC_000770	XLOC_000770	Lct	1:130180696-130215847	FVA	AG1	OK	1.51871	9.00563	2.56798	-9.59415	0	0	yes
XLOC_000771	XLOC_000771	Mcm6	1:130228156-130256282	FVA	AG1	OK	2.00661	5.0176	1.32224	-6.15463	7.52521e-10	2.56638e-08	yes
XLOC_000778	XLOC_000778	Dyrk3	1:133024344-133034775	FVA	AG1	OK	2.17816	4.02941	0.887455	-4.06249	4.85513e-05	0.000741542	yes
XLOC_000783	XLOC_000783	Mfsd4	1:133904031-133964590	FVA	AG1	OK	10.5155	17.7384	0.754356	-3.89661	9.75493e-05	0.00136941	yes
XLOC_000784	XLOC_000784	Cdk18	1:134010087-134036329	FVA	AG1	OK	18.377	7.52409	-1.28831	8.71603	0	0	yes
XLOC_000791	XLOC_000791	Sox13	1:135278877-135320541	FVA	AG1	OK	5.26549	2.48175	-1.08521	4.39853	1.08985e-05	0.000190035	yes
XLOC_000796	XLOC_000796	Prelp	1:135806851-135817995	FVA	AG1	OK	5.86586	9.3942	0.679429	-4.18847	2.80841e-05	0.000450307	yes
XLOC_000797	XLOC_000797	Btg2	1:135971786-135975733	FVA	AG1	OK	2.55921	6.72291	1.39339	-6.82023	9.0894e-12	3.83143e-10	yes
XLOC_000798	XLOC_000798	Adora1	1:136094991-136132239	FVA	AG1	OK	28.9981	54.4187	0.908144	-6.03217	1.61776e-09	5.3176e-08	yes
XLOC_000801	XLOC_000801	Ppp1r12b	1:136650923-136675413	FVA	AG1	OK	0.528292	0.106078	-2.31621	2.84018	0.00450883	0.0364728	yes
XLOC_000816	XLOC_000816	Nek7	1:140380411-140516589	FVA	AG1	OK	14.5816	10.4964	-0.474261	2.97293	0.00294969	0.0258405	yes
XLOC_000819	XLOC_000819	Crb1	1:141233606-141234149	FVA	AG1	OK	1.15953	0.274691	-2.07766	2.9238	0.0034579	0.029425	yes
XLOC_000823	XLOC_000823	Trove2	1:145597790-145624168	FVA	AG1	OK	8.21947	5.34935	-0.619682	4.17358	2.99854e-05	0.00047831	yes
XLOC_000824	XLOC_000824	Rgs2	1:145846521-145851319	FVA	AG1	OK	13.6201	9.65591	-0.496256	3.31256	0.00092447	0.00985371	yes
XLOC_000830	XLOC_000830	Prg4	1:152299364-152312726	FVA	AG1	OK	0.0859706	0.801651	3.22106	-5.11305	3.16999e-07	7.35886e-06	yes
XLOC_000835	XLOC_000835	Rnf2	1:153316479-153348077	FVA	AG1	OK	4.71671	10.2002	1.11275	-6.47737	9.3334e-11	3.53845e-09	yes
XLOC_000837	XLOC_000837	1700025G04Rik	1:153731654-153937354	FVA	AG1	OK	6.69801	10.5043	0.649174	-4.90396	9.39217e-07	2.00276e-05	yes
XLOC_000839	XLOC_000839	Rgl1	1:154363890-154613524	FVA	AG1	OK	12.3174	25.4423	1.04653	-6.51614	7.21392e-11	2.77233e-09	yes
XLOC_000846	XLOC_000846	5830403L16Rik	1:155695864-155698178	FVA	AG1	OK	0.213254	0.542732	1.34767	-2.77537	0.00551395	0.0430663	yes
XLOC_000848	XLOC_000848	Cacna1e	1:156237752-156296074	FVA	AG1	OK	10.2803	1.13808	-3.17521	10.707	0	0	yes
XLOC_000849	XLOC_000849	Ier5	1:156943500-156946826	FVA	AG1	OK	3.39607	9.34482	1.4603	-8.06259	6.66134e-16	4.06763e-14	yes
XLOC_000850	XLOC_000850	Mr1	1:156974420-156993930	FVA	AG1	OK	2.5409	1.29944	-0.967458	3.16195	0.00156714	0.0154258	yes
XLOC_000859	XLOC_000859	Abl2	1:158489253-158579983	FVA	AG1	OK	0.405886	3.44595	3.08575	-4.64844	3.34452e-06	6.483e-05	yes
XLOC_000862	XLOC_000862	Ralgps2	1:158734163-158869751	FVA	AG1	OK	5.08154	8.53633	0.74835	-4.13846	3.49645e-05	0.000550068	yes
XLOC_000867	XLOC_000867	Tnr	1:161453851-161862026	FVA	AG1	OK	1.27893	16.8043	3.71582	-5.86069	4.60939e-09	1.41995e-07	yes
XLOC_000870	XLOC_000870	Rabgap1l	1:162149244-162722978	FVA	AG1	OK	11.1973	23.2422	1.0536	-6.48877	8.65403e-11	3.30114e-09	yes
XLOC_000890	XLOC_000890	Dcaf6	1:167258789-167411535	FVA	AG1	OK	10.7217	18.7885	0.809307	-5.75649	8.5881e-09	2.53686e-07	yes
XLOC_000891	XLOC_000891	7SK	1:167423109-167429302	FVA	AG1	OK	0.114861	0.652616	2.50635	-6.21006	5.29644e-10	1.82035e-08	yes
XLOC_000893	XLOC_000893	Rcsd1	1:167579035-167638174	FVA	AG1	OK	5.85556	1.7116	-1.77446	6.23983	4.38041e-10	1.51903e-08	yes
XLOC_000894	XLOC_000894	Pou2f1	1:167795280-167932748	FVA	AG1	OK	3.52132	2.11562	-0.735037	4.41137	1.02719e-05	0.00018033	yes
XLOC_000895	XLOC_000895	Dusp27	1:168028343-168031451	FVA	AG1	OK	0.966667	0.0461415	-4.38888	5.67571	1.38111e-08	3.94761e-07	yes
XLOC_000900	XLOC_000900	Uck2	1:169153031-169215066	FVA	AG1	OK	4.87142	7.35718	0.59481	-3.66661	0.000245788	0.00314596	yes
XLOC_000901	XLOC_000901	Mgst3	1:169301865-169324069	FVA	AG1	OK	36.5597	22.2665	-0.715381	4.85811	1.18514e-06	2.47089e-05	yes
XLOC_000904	XLOC_000904	Rgs4	1:171671273-171677879	FVA	AG1	OK	82.3826	39.4032	-1.06403	8.65938	0	0	yes
XLOC_000905	XLOC_000905	Hsd17b7	1:171879675-171899367	FVA	AG1	OK	5.50155	4.01077	-0.455956	2.76626	0.00567033	0.0440538	yes
XLOC_000906	XLOC_000906	Ddr2	1:171902013-172019069	FVA	AG1	OK	0.781451	1.55609	0.993702	-4.21192	2.53211e-05	0.000409405	yes
XLOC_000909	XLOC_000909	Nos1ap	1:172243175-172519749	FVA	AG1	OK	0.604021	1.39687	1.20953	-5.82736	5.63108e-09	1.71081e-07	yes
XLOC_000910	XLOC_000910	Atf6	1:172634633-172798012	FVA	AG1	OK	6.54821	11.318	0.789451	-4.60344	4.15575e-06	7.90181e-05	yes
XLOC_000917	XLOC_000917	Pcp4l1	1:173103334-173126423	FVA	AG1	OK	105.486	24.399	-2.11216	14.5336	0	0	yes
XLOC_000932	XLOC_000932	Kcnj9	1:174250550-174259481	FVA	AG1	OK	38.7853	26.1041	-0.571235	4.00126	6.30059e-05	0.000929423	yes
XLOC_000933	XLOC_000933	Dusp23	1:174560852-174563151	FVA	AG1	OK	1.81023	3.68777	1.02658	-3.75802	0.00017126	0.00227693	yes
XLOC_000934	XLOC_000934	Cadm3	1:175259935-175297932	FVA	AG1	OK	41.2517	54.9961	0.414875	-2.80625	0.00501218	0.0398421	yes
XLOC_000935	XLOC_000935	Gm16340,Ifi203,Ifi204,Mndal	1:175682856-175947516	FVA	AG1	OK	3.18697	11.2498	1.81964	-3.81759	0.000134762	0.00183189	yes
XLOC_000939	XLOC_000939	Opn3	1:177592496-177622769	FVA	AG1	OK	9.98647	1.46083	-2.77318	11.0327	0	0	yes
XLOC_000940	XLOC_000940	Pld5	1:177892039-178205382	FVA	AG1	OK	4.2827	0.623729	-2.77953	8.79903	0	0	yes
XLOC_000955	XLOC_000955	6330403A02Rik	1:182361137-182413673	FVA	AG1	OK	42.1831	81.0805	0.942691	-7.12243	1.06049e-12	4.92735e-11	yes
XLOC_000957	XLOC_000957	Lefty1	1:182851041-182868524	FVA	AG1	OK	0.0646471	0.834073	3.68952	-3.7479	0.000178324	0.00236373	yes
XLOC_000961	XLOC_000961	Ccdc121	1:183439879-183441563	FVA	AG1	OK	1.37047	0.500464	-1.45333	3.65906	0.000253139	0.00321969	yes
XLOC_000963	XLOC_000963	Enah	1:183826518-183949773	FVA	AG1	OK	21.463	15.4584	-0.473457	3.79109	0.000149986	0.00201403	yes
XLOC_000966	XLOC_000966	Capn2	1:184397382-184447572	FVA	AG1	OK	24.2903	16.7539	-0.535887	3.26047	0.00111229	0.011591	yes
XLOC_000980	XLOC_000980	Kcnk2	1:191031805-191168820	FVA	AG1	OK	6.13469	10.6086	0.790176	-3.06766	0.00215738	0.0201143	yes
XLOC_000982	XLOC_000982	Prox1	1:191941910-192044360	FVA	AG1	OK	11.5194	15.421	0.420834	-2.91699	0.00353423	0.0299837	yes
XLOC_000985	XLOC_000985	Vash2	1:192771615-192803070	FVA	AG1	OK	3.40875	0.493407	-2.78839	7.94558	1.9984e-15	1.18516e-13	yes
XLOC_000989	XLOC_000989	Nenf	1:193130539-193141938	FVA	AG1	OK	40.0021	28.4465	-0.491824	2.88661	0.0038942	0.0324408	yes
XLOC_000991	XLOC_000991	Dtl	1:193362331-193365093	FVA	AG1	OK	0.0497039	0.803753	4.01532	-2.77121	0.00558491	0.0435104	yes
XLOC_001008	XLOC_001008	-	1:3664627-3666769	FVA	AG1	OK	0.930517	0.400449	-1.21641	3.06613	0.00216849	0.0201919	yes
XLOC_001041	XLOC_001041	Gm16899	1:7346845-7348686	FVA	AG1	OK	0.501424	0.106555	-2.23444	3.06976	0.00214233	0.0199992	yes
XLOC_001068	XLOC_001068	-	1:15837699-15838434	FVA	AG1	OK	1.28134	0.249136	-2.36265	2.86528	0.00416638	0.0341557	yes
XLOC_001069	XLOC_001069	-	1:15838791-15840352	FVA	AG1	OK	0.737421	0.14968	-2.30061	3.40611	0.000658963	0.00736637	yes
XLOC_001070	XLOC_001070	Gm106	1:15841519-15842374	FVA	AG1	OK	1.04843	0.183764	-2.51231	2.92203	0.00347759	0.0295707	yes
XLOC_001078	XLOC_001078	-	1:16530879-16532876	FVA	AG1	OK	0.320288	1.10158	1.78213	-4.17011	3.04446e-05	0.000484137	yes
XLOC_001083	XLOC_001083	Ube2w	1:16550685-16557917	FVA	AG1	OK	0.834496	1.86179	1.15772	-5.47572	4.35744e-08	1.16872e-06	yes
XLOC_001092	XLOC_001092	-	1:16932892-16935661	FVA	AG1	OK	0.218644	0.818435	1.90429	-4.21328	2.5169e-05	0.000407585	yes
XLOC_001096	XLOC_001096	-	1:17109551-17110601	FVA	AG1	OK	0.095993	0.987036	3.3621	-3.30184	0.000960526	0.0101882	yes
XLOC_001097	XLOC_001097	-	1:17110663-17113477	FVA	AG1	OK	0.155596	0.948532	2.60789	-5.36509	8.09088e-08	2.07118e-06	yes
XLOC_001106	XLOC_001106	-	1:17765906-17768168	FVA	AG1	OK	0.236134	1.27952	2.43793	-5.48293	4.18345e-08	1.12498e-06	yes
XLOC_001137	XLOC_001137	-	1:32748648-32752064	FVA	AG1	OK	0.519092	0.0642817	-3.01351	4.6369	3.53676e-06	6.80865e-05	yes
XLOC_001144	XLOC_001144	-	1:34473320-34474460	FVA	AG1	OK	0.243278	1.35093	2.47328	-3.9231	8.74151e-05	0.00124068	yes
XLOC_001206	XLOC_001206	-	1:40737273-40738078	FVA	AG1	OK	0.368507	3.35907	3.1883	-5.12604	2.95898e-07	6.92626e-06	yes
XLOC_001207	XLOC_001207	-	1:42318731-42361771	FVA	AG1	OK	0.0945007	0.755713	2.99944	-3.08043	0.00206705	0.0194067	yes
XLOC_001220	XLOC_001220	-	1:42645981-42687203	FVA	AG1	OK	0.10907	0.522977	2.26149	-4.97165	6.63866e-07	1.45579e-05	yes
XLOC_001228	XLOC_001228	-	1:42806301-42809769	FVA	AG1	OK	0.274876	0.758299	1.46399	-4.00672	6.15677e-05	0.000912383	yes
XLOC_001240	XLOC_001240	Fhl2	1:43179907-43220815	FVA	AG1	OK	0.370818	3.74832	3.33746	-4.32836	1.50222e-05	0.000254331	yes
XLOC_001243	XLOC_001243	-	1:43944804-43945265	FVA	AG1	OK	38.8122	59.478	0.615848	-3.23439	0.00121902	0.0125634	yes
XLOC_001365	XLOC_001365	1110028C15Rik	1:66858683-66859689	FVA	AG1	OK	0.851193	0.114486	-2.89432	3.00724	0.00263633	0.0236245	yes
XLOC_001424	XLOC_001424	-	1:78211483-78213200	FVA	AG1	OK	1.74166	0.110792	-3.97454	5.6821	1.33047e-08	3.8099e-07	yes
XLOC_001425	XLOC_001425	-	1:78214405-78214855	FVA	AG1	OK	1.22777	0	-1.79769e+308	-1.79769e+308	0.00214107	0.0199985	yes
XLOC_001461	XLOC_001461	Slc16a14	1:84900140-84901995	FVA	AG1	OK	1.11331	2.14149	0.943755	-3.17748	0.00148563	0.0147979	yes
XLOC_001477	XLOC_001477	C130036L24Rik	1:88266352-88267540	FVA	AG1	OK	0.226471	0.878609	1.95589	-2.97969	0.0028854	0.0254288	yes
XLOC_001486	XLOC_001486	Trpm8	1:90220688-90221136	FVA	AG1	OK	1.35995	0	-1.79769e+308	-1.79769e+308	0.00146216	0.0146065	yes
XLOC_001489	XLOC_001489	-	1:91839515-91845266	FVA	AG1	OK	1.3953	0.773877	-0.850397	3.7323	0.000189742	0.00249475	yes
XLOC_001490	XLOC_001490	Asb18	1:91845341-91847477	FVA	AG1	OK	1.5728	0.727222	-1.11286	3.53932	0.000401159	0.00476915	yes
XLOC_001492	XLOC_001492	-	1:92348763-92349263	FVA	AG1	OK	0	0.737006	1.79769e+308	1.79769e+308	0.00648731	0.0491287	yes
XLOC_001551	XLOC_001551	-	1:102673017-102675174	FVA	AG1	OK	0.614152	1.76892	1.5262	-4.55312	5.28571e-06	9.8503e-05	yes
XLOC_001575	XLOC_001575	Serpinb8	1:109506133-109506757	FVA	AG1	OK	0	1.0591	1.79769e+308	1.79769e+308	0.000194671	0.00254655	yes
XLOC_001580	XLOC_001580	Cdh7	1:112037691-112041834	FVA	AG1	OK	1.40242	0.282238	-2.31293	7.29474	2.99316e-13	1.46565e-11	yes
XLOC_001598	XLOC_001598	-	1:120508245-120509420	FVA	AG1	OK	0.95884	2.82095	1.55682	-4.3318	1.47892e-05	0.000251075	yes
XLOC_001606	XLOC_001606	-	1:121333382-121334967	FVA	AG1	OK	0.177523	0.719952	2.0199	-3.2414	0.00118944	0.0122955	yes
XLOC_001638	XLOC_001638	Gm16083	1:132429386-132430920	FVA	AG1	OK	0.924671	0.293955	-1.65334	3.18424	0.00145137	0.0145127	yes
XLOC_001650	XLOC_001650	Lemd1	1:134098224-134099422	FVA	AG1	OK	0.998342	0.086462	-3.5294	3.62037	0.000294184	0.00365342	yes
XLOC_001651	XLOC_001651	Lemd1	1:134100487-134106108	FVA	AG1	OK	1.32483	0.262461	-2.33564	8.13216	4.44089e-16	2.74429e-14	yes
XLOC_001689	XLOC_001689	Pkp1	1:137766388-137766857	FVA	AG1	OK	12.2724	5.60522	-1.13057	3.67421	0.000238587	0.00306013	yes
XLOC_001710	XLOC_001710	-	1:152115820-152116521	FVA	AG1	OK	14.0372	8.84825	-0.665786	2.88788	0.00387848	0.032336	yes
XLOC_001717	XLOC_001717	Tsen15	1:154227138-154228501	FVA	AG1	OK	0.568036	0.0981606	-2.53277	2.87499	0.00404036	0.0333171	yes
XLOC_001808	XLOC_001808	Ildr2	1:168248922-168251007	FVA	AG1	OK	0.958324	0.457389	-1.06709	2.77277	0.00555814	0.0433566	yes
XLOC_001831	XLOC_001831	-	1:174270432-174271232	FVA	AG1	OK	2.64484	0.199277	-3.73033	4.49345	7.008e-06	0.000127298	yes
XLOC_001843	XLOC_001843	-	1:178657419-178659860	FVA	AG1	OK	2.03766	1.13424	-0.845183	3.17654	0.00149044	0.0148362	yes
XLOC_001844	XLOC_001844	-	1:178660035-178661654	FVA	AG1	OK	2.77874	1.36244	-1.02824	3.60965	0.000306616	0.00379104	yes
XLOC_001862	XLOC_001862	-	1:181888731-181889855	FVA	AG1	OK	0.278524	0.917749	1.7203	-2.76226	0.00574021	0.0445181	yes
XLOC_001873	XLOC_001873	-	1:182851041-182868524	FVA	AG1	OK	0.0492994	0.583096	3.56409	-3.65387	0.000258317	0.00326504	yes
XLOC_001874	XLOC_001874	-	1:182851041-182868524	FVA	AG1	OK	0.0421588	0.727325	4.1087	-4.18156	2.89513e-05	0.00046373	yes
XLOC_001877	XLOC_001877	-	1:183017273-183020518	FVA	AG1	OK	2.16417	4.51892	1.06216	-5.1484	2.62721e-07	6.20134e-06	yes
XLOC_001884	XLOC_001884	-	1:183144525-183147265	FVA	AG1	OK	0.554452	0.203036	-1.44933	3.11763	0.00182311	0.0175375	yes
XLOC_001891	XLOC_001891	-	1:183392877-183401203	FVA	AG1	OK	0.626318	1.24408	0.99011	-4.45018	8.57969e-06	0.000153234	yes
XLOC_001965	XLOC_001965	-	1:192239919-192243684	FVA	AG1	OK	1.03704	0	-1.79769e+308	-1.79769e+308	0.00121185	0.0125063	yes
XLOC_001976	XLOC_001976	Vash2	1:192771615-192803070	FVA	AG1	OK	1.31624	0.0520399	-4.66066	3.94478	7.98748e-05	0.00114417	yes
XLOC_001989	XLOC_001989	-	1:193062395-193064027	FVA	AG1	OK	0.468724	0.0466335	-3.3293	3.00237	0.00267891	0.0239228	yes
XLOC_002013	XLOC_002013	-	1:194700561-194704515	FVA	AG1	OK	0.28944	1.34385	2.21504	-6.5862	4.51226e-11	1.77605e-09	yes
XLOC_002027	XLOC_002027	Cnksr3	10:3134434-3227518	FVA	AG1	OK	4.44947	1.28618	-1.79054	8.36607	0	0	yes
XLOC_002029	XLOC_002029	Rgs17	10:4424130-4520883	FVA	AG1	OK	11.3151	4.64543	-1.28436	9.23335	0	0	yes
XLOC_002036	XLOC_002036	Lrp11	10:7309522-7346627	FVA	AG1	OK	24.3734	40.774	0.742341	-5.53933	3.03627e-08	8.31691e-07	yes
XLOC_002040	XLOC_002040	Ppil4	10:7512699-7543212	FVA	AG1	OK	8.97861	12.024	0.421354	-2.83018	0.00465216	0.037394	yes
XLOC_002042	XLOC_002042	Shprh	10:10869271-10936304	FVA	AG1	OK	3.88424	7.33683	0.917524	-3.63862	0.000274103	0.00344138	yes
XLOC_002048	XLOC_002048	Adat2	10:13273009-13287250	FVA	AG1	OK	1.70888	3.09585	0.857282	-3.45258	0.000555262	0.00633315	yes
XLOC_002049	XLOC_002049	Hivep2	10:13685681-13871183	FVA	AG1	OK	15.1857	30.5254	1.0073	-7.1524	8.52651e-13	3.99776e-11	yes
XLOC_002051	XLOC_002051	Cited2	10:17442889-17445546	FVA	AG1	OK	16.7502	11.0517	-0.59991	3.86212	0.000112408	0.00155609	yes
XLOC_002057	XLOC_002057	D10Bwg1379e	10:18299938-18463830	FVA	AG1	OK	0.97358	11.2866	3.53517	-6.83443	8.23319e-12	3.49916e-10	yes
XLOC_002065	XLOC_002065	Ahi1	10:20672330-20800290	FVA	AG1	OK	81.6644	55.5753	-0.555262	3.65893	0.000253275	0.00321969	yes
XLOC_002072	XLOC_002072	Moxd1	10:23943460-24022570	FVA	AG1	OK	0.807624	2.39895	1.57065	-5.76638	8.09919e-09	2.39932e-07	yes
XLOC_002073	XLOC_002073	Ctgf	10:24299945-24318470	FVA	AG1	OK	1.13087	3.88932	1.78209	-6.5169	7.17757e-11	2.7618e-09	yes
XLOC_002077	XLOC_002077	Arhgap18	10:26492227-26638448	FVA	AG1	OK	4.47077	1.86583	-1.2607	4.40354	1.06498e-05	0.000186225	yes
XLOC_002078	XLOC_002078	Ptprk	10:27794607-28325106	FVA	AG1	OK	5.47413	9.92393	0.858283	-4.12986	3.62981e-05	0.000568732	yes
XLOC_002086	XLOC_002086	Tspyl4	10:34016954-34021356	FVA	AG1	OK	210.32	146.222	-0.524428	3.25099	0.00115003	0.0119321	yes
XLOC_002092	XLOC_002092	Fyn	10:39089525-39285446	FVA	AG1	OK	24.4275	31.4914	0.366457	-2.79223	0.00523467	0.0412737	yes
XLOC_002097	XLOC_002097	Ddo	10:40349790-40396274	FVA	AG1	OK	0.993771	0.437877	-1.18239	3.3042	0.000952486	0.0101169	yes
XLOC_002099	XLOC_002099	Wasf1	10:40551353-40658377	FVA	AG1	OK	36.8329	151.68	2.04196	-11.897	0	0	yes
XLOC_002107	XLOC_002107	Snx3	10:42221890-42255225	FVA	AG1	OK	68.5175	91.3442	0.414841	-3.21772	0.00129215	0.0131852	yes
XLOC_002118	XLOC_002118	Popdc3	10:45009269-45038581	FVA	AG1	OK	0.323628	3.16089	3.28792	-7.58948	3.21965e-14	1.71815e-12	yes
XLOC_002119	XLOC_002119	Bves	10:45055673-45092254	FVA	AG1	OK	0.393756	1.9623	2.31718	-4.94438	7.63871e-07	1.65281e-05	yes
XLOC_002139	XLOC_002139	Sh3rf3	10:58276058-58601719	FVA	AG1	OK	2.18856	7.80143	1.83376	-6.60212	4.05311e-11	1.61125e-09	yes
XLOC_002142	XLOC_002142	P4ha1	10:58786020-58836331	FVA	AG1	OK	9.60485	15.8679	0.724279	-4.41859	9.93469e-06	0.000175107	yes
XLOC_002150	XLOC_002150	Pcbd1	10:60551904-60557075	FVA	AG1	OK	20.6078	3.70113	-2.47715	11.0049	0	0	yes
XLOC_002151	XLOC_002151	Tbata	10:60637163-60658735	FVA	AG1	OK	0.621791	8.58098	3.78664	-3.4645	0.000531222	0.0060814	yes
XLOC_002154	XLOC_002154	Npffr1	10:61058077-61092422	FVA	AG1	OK	1.84978	1.12987	-0.711191	3.2094	0.0013301	0.0134879	yes
XLOC_002160	XLOC_002160	Gm5424	10:61533762-61535221	FVA	AG1	OK	40.692	12.9514	-1.65163	10.8089	0	0	yes
XLOC_002162	XLOC_002162	Slc25a16	10:62383406-62409218	FVA	AG1	OK	7.83516	12.6911	0.69578	-4.41582	1.00628e-05	0.00017686	yes
XLOC_002168	XLOC_002168	Dnajc12	10:62849237-62871690	FVA	AG1	OK	11.3552	5.95285	-0.931704	4.78905	1.67573e-06	3.41761e-05	yes
XLOC_002172	XLOC_002172	Egr2	10:67000541-67004936	FVA	AG1	OK	0.155187	1.30054	3.06703	-6.53878	6.20208e-11	2.40728e-09	yes
XLOC_002176	XLOC_002176	Ccdc6	10:69560140-69655957	FVA	AG1	OK	8.51189	11.8219	0.473914	-3.36725	0.000759226	0.00830098	yes
XLOC_002178	XLOC_002178	Fam13c	10:69902136-70062062	FVA	AG1	OK	11.4293	19.1026	0.741038	-3.28941	0.00100399	0.010573	yes
XLOC_002179	XLOC_002179	Ipmk	10:70810732-70848634	FVA	AG1	OK	5.98159	8.88008	0.570044	-3.50371	0.00045882	0.00536587	yes
XLOC_002181	XLOC_002181	Zwint	10:72117551-72137715	FVA	AG1	OK	464.973	289.229	-0.684933	5.28842	1.23379e-07	3.05462e-06	yes
XLOC_002193	XLOC_002193	Chchd10	10:75398400-75402765	FVA	AG1	OK	22.8392	17.4358	-0.38946	2.8665	0.00415038	0.0340516	yes
XLOC_002195	XLOC_002195	S100b	10:75716391-75807968	FVA	AG1	OK	9.31259	4.72439	-0.979054	3.44553	0.000569949	0.00647914	yes
XLOC_002203	XLOC_002203	Sumo3	10:77068904-77081528	FVA	AG1	OK	17.7802	30.8009	0.792701	-5.43013	5.6312e-08	1.47577e-06	yes
XLOC_002206	XLOC_002206	Icosl	10:77531999-77542267	FVA	AG1	OK	2.55181	4.83312	0.921431	-3.50345	0.000459276	0.00536917	yes
XLOC_002208	XLOC_002208	Ilvbl	10:78037228-78054669	FVA	AG1	OK	8.43601	4.99566	-0.755887	3.6586	0.000253596	0.00322072	yes
XLOC_002210	XLOC_002210	Slc1a6	10:78243190-78277667	FVA	AG1	OK	6.48764	3.59039	-0.853553	3.61471	0.000300687	0.00372669	yes
XLOC_002215	XLOC_002215	Hcn2	10:79179691-79209305	FVA	AG1	OK	52.9577	28.5157	-0.893084	6.31953	2.62359e-10	9.39326e-09	yes
XLOC_002218	XLOC_002218	Palm	10:79256393-79284019	FVA	AG1	OK	34.7282	68.3086	0.975959	-6.16033	7.2593e-10	2.48117e-08	yes
XLOC_002232	XLOC_002232	Cirbp	10:79630512-79637975	FVA	AG1	OK	18.6334	12.362	-0.591981	2.81098	0.00493907	0.0393264	yes
XLOC_002240	XLOC_002240	Plk5	10:79819313-79828234	FVA	AG1	OK	7.96809	23.4296	1.55603	-6.71793	1.84324e-11	7.57345e-10	yes
XLOC_002241	XLOC_002241	Onecut3	10:79978791-79979524	FVA	AG1	OK	1.01071	0	-1.79769e+308	-1.79769e+308	0.000121021	0.0016634	yes
XLOC_002248	XLOC_002248	Lingo3	10:80295486-80306778	FVA	AG1	OK	0.210167	0.783907	1.89915	-4.23964	2.23879e-05	0.000365614	yes
XLOC_002251	XLOC_002251	Gadd45b	10:80392595-80394980	FVA	AG1	OK	2.78966	6.47036	1.21376	-5.09165	3.54966e-07	8.13632e-06	yes
XLOC_002253	XLOC_002253	Thop1	10:80532781-80545157	FVA	AG1	OK	10.4806	14.3355	0.451867	-2.9166	0.00353869	0.0299968	yes
XLOC_002258	XLOC_002258	Zfr2	10:80695858-80729726	FVA	AG1	OK	30.7542	67.289	1.12959	-4.70611	2.52485e-06	4.98167e-05	yes
XLOC_002260	XLOC_002260	Pip5k1c	10:80755750-80782780	FVA	AG1	OK	53.8321	93.9672	0.803691	-5.37004	7.87171e-08	2.01842e-06	yes
XLOC_002277	XLOC_002277	Hcfc2	10:82161819-82205851	FVA	AG1	OK	3.6818	7.44517	1.01589	-6.41668	1.39282e-10	5.17251e-09	yes
XLOC_002288	XLOC_002288	Ric8b	10:84380056-84481076	FVA	AG1	OK	13.4081	8.46046	-0.664296	3.19907	0.00137872	0.0139007	yes
XLOC_002291	XLOC_002291	Btbd11	10:84849581-85123036	FVA	AG1	OK	15.6597	4.21961	-1.89188	8.13736	4.44089e-16	2.74429e-14	yes
XLOC_002294	XLOC_002294	-	10:86121774-86124914	FVA	AG1	OK	0.954009	0.0572361	-4.05901	4.33323	1.46937e-05	0.000249591	yes
XLOC_002295	XLOC_002295	-	10:86128323-86133618	FVA	AG1	OK	0.913363	0.149335	-2.61264	3.53491	0.00040791	0.00483638	yes
XLOC_002298	XLOC_002298	Nt5dc3	10:86241770-86305866	FVA	AG1	OK	20.2835	27.4823	0.438191	-3.57904	0.00034486	0.00419577	yes
XLOC_002300	XLOC_002300	Pmch	10:87553815-87555214	FVA	AG1	OK	100.838	0.161905	-9.28268	10.8968	0	0	yes
XLOC_002308	XLOC_002308	Anks1b	10:89335836-90436045	FVA	AG1	OK	49.4792	82.876	0.744133	-3.86067	0.000113078	0.00156414	yes
XLOC_002323	XLOC_002323	Btg1	10:96079602-96082334	FVA	AG1	OK	7.50042	14.8935	0.989642	-5.61861	1.92494e-08	5.41684e-07	yes
XLOC_002324	XLOC_002324	Dcn	10:96942089-96980796	FVA	AG1	OK	5.75331	26.708	2.21481	-8.99598	0	0	yes
XLOC_002325	XLOC_002325	Lum	10:97028379-97035337	FVA	AG1	OK	0.771148	1.77896	1.20596	-3.57665	0.000348032	0.004227	yes
XLOC_002326	XLOC_002326	Epyc	10:97141503-97145408	FVA	AG1	OK	0.138888	1.46115	3.39512	-8.54832	0	0	yes
XLOC_002329	XLOC_002329	Dusp6	10:98725639-98730119	FVA	AG1	OK	9.88968	18.3953	0.895341	-5.95904	2.53721e-09	8.06529e-08	yes
XLOC_002331	XLOC_002331	Kitl	10:99478350-99563045	FVA	AG1	OK	19.6048	4.5858	-2.09596	15.1293	0	0	yes
XLOC_002335	XLOC_002335	Slc6a15	10:102830151-102882015	FVA	AG1	OK	11.7817	17.1928	0.545258	-3.31564	0.000914347	0.00976209	yes
XLOC_002338	XLOC_002338	Ppfia2	10:105904943-106373263	FVA	AG1	OK	12.8763	33.8398	1.394	-7.40386	1.32339e-13	6.65961e-12	yes
XLOC_002340	XLOC_002340	Ppp1r12a	10:107599166-107717282	FVA	AG1	OK	12.0983	19.9673	0.722844	-4.524	6.06803e-06	0.000111601	yes
XLOC_002347	XLOC_002347	Phlda1	10:110943464-110956560	FVA	AG1	OK	5.64433	9.28038	0.717382	-3.71505	0.000203163	0.00264755	yes
XLOC_002349	XLOC_002349	Kcnc2	10:111706424-111903395	FVA	AG1	OK	38.653	17.8176	-1.11728	7.27857	3.37286e-13	1.64896e-11	yes
XLOC_002357	XLOC_002357	-	10:116387623-116400522	FVA	AG1	OK	0.814265	3.13195	1.94349	-3.21904	0.0012862	0.0131388	yes
XLOC_002373	XLOC_002373	Fam19a2	10:122701076-123178280	FVA	AG1	OK	3.72484	6.90694	0.890867	-5.06218	4.14485e-07	9.39727e-06	yes
XLOC_002383	XLOC_002383	Agap2	10:126510390-126558279	FVA	AG1	OK	17.451	55.5554	1.67061	-10.0803	0	0	yes
XLOC_002391	XLOC_002391	Tac2	10:127162274-127168827	FVA	AG1	OK	47.9543	4.25011	-3.49609	7.56049	4.01901e-14	2.11549e-12	yes
XLOC_002413	XLOC_002413	Itga7	10:128370813-128395342	FVA	AG1	OK	8.01339	11.7948	0.557669	-2.77817	0.00546654	0.0427644	yes
XLOC_002416	XLOC_002416	Oprm1	10:3486515-3558002	FVA	AG1	OK	5.25461	0.671536	-2.96805	17.6578	0	0	yes
XLOC_002419	XLOC_002419	Vip	10:4698891-4707393	FVA	AG1	OK	0.792708	7.68194	3.27661	-9.13415	0	0	yes
XLOC_002422	XLOC_002422	1700052N19Rik	10:5891398-5914099	FVA	AG1	OK	6.99184	10.7966	0.626838	-2.83828	0.00453571	0.036639	yes
XLOC_002424	XLOC_002424	Akap12	10:5987068-6080266	FVA	AG1	OK	12.7626	4.18068	-1.61011	8.88863	0	0	yes
XLOC_002427	XLOC_002427	Plekhg1	10:6379159-6416338	FVA	AG1	OK	106.939	8.20443	-3.70425	3.55863	0.0003728	0.00448162	yes
XLOC_002429	XLOC_002429	Ppp1r14c	10:6881528-6980492	FVA	AG1	OK	2.93506	5.78454	0.978815	-3.04729	0.00230916	0.021241	yes
XLOC_002433	XLOC_002433	Ust	10:7924499-8238657	FVA	AG1	OK	3.28928	14.2474	2.11486	-12.5219	0	0	yes
XLOC_002434	XLOC_002434	Sash1	10:8441953-8665015	FVA	AG1	OK	23.2126	16.2209	-0.517052	3.41321	0.000642023	0.00719261	yes
XLOC_002435	XLOC_002435	Samd5	10:9342675-9395015	FVA	AG1	OK	5.65373	2.95633	-0.935399	6.06988	1.28008e-09	4.24377e-08	yes
XLOC_002436	XLOC_002436	Stxbp5	10:9474984-9620695	FVA	AG1	OK	8.43994	12.6502	0.58386	-4.54906	5.38854e-06	0.000100178	yes
XLOC_002439	XLOC_002439	Grm1	10:10405679-10802205	FVA	AG1	OK	26.7509	10.8459	-1.30243	7.72729	1.08802e-14	6.01388e-13	yes
XLOC_002442	XLOC_002442	Phactr2	10:12927521-13193909	FVA	AG1	OK	11.9409	4.47094	-1.41726	4.54342	5.53487e-06	0.000102528	yes
XLOC_002451	XLOC_002451	Hebp2	10:18259936-18265884	FVA	AG1	OK	2.16666	1.04785	-1.04804	3.57801	0.000346215	0.00420824	yes
XLOC_002452	XLOC_002452	D10Bwg1379e	10:18299938-18463830	FVA	AG1	OK	10.6377	2.22263	-2.25885	11.0602	0	0	yes
XLOC_002453	XLOC_002453	Tnfaip3	10:18720721-18735143	FVA	AG1	OK	0.63215	1.90157	1.58885	-6.15138	7.68093e-10	2.6166e-08	yes
XLOC_002454	XLOC_002454	Slc35d3	10:19568041-19570778	FVA	AG1	OK	1.3974	0.477245	-1.54994	4.00121	6.30184e-05	0.000929423	yes
XLOC_002456	XLOC_002456	Pde7b	10:20116833-20444911	FVA	AG1	OK	10.524	3.90088	-1.43181	9.38885	0	0	yes
XLOC_002475	XLOC_002475	Rspo3	10:29172188-29255689	FVA	AG1	OK	1.74055	3.4891	1.00331	-3.04253	0.00234598	0.0215029	yes
XLOC_002476	XLOC_002476	Cenpw	10:29920152-29920380	FVA	AG1	OK	0.620573	1.44593	1.22032	-2.95584	0.00311823	0.0269804	yes
XLOC_002482	XLOC_002482	Tpd52l1	10:31052104-31165822	FVA	AG1	OK	21.4017	12.5012	-0.77566	5.60098	2.13147e-08	5.96541e-07	yes
XLOC_002484	XLOC_002484	Nkain2	10:31409116-31671132	FVA	AG1	OK	11.1682	15.3056	0.454667	-2.96969	0.00298101	0.0260337	yes
XLOC_002487	XLOC_002487	Clvs2	10:33231775-33345261	FVA	AG1	OK	8.66528	14.1924	0.711798	-3.65888	0.00025332	0.00321969	yes
XLOC_002490	XLOC_002490	Fam26e	10:33809211-33816424	FVA	AG1	OK	0.802377	1.94094	1.27441	-5.03177	4.85969e-07	1.08729e-05	yes
XLOC_002497	XLOC_002497	-	10:39609840-39618975	FVA	AG1	OK	2.33422	3.66796	0.65204	-2.81048	0.00494678	0.0393729	yes
XLOC_002499	XLOC_002499	Slc16a10	10:39753461-39861632	FVA	AG1	OK	0.334804	1.15502	1.78653	-3.65717	0.000255019	0.00323597	yes
XLOC_002502	XLOC_002502	Cdc40	10:40551353-40658377	FVA	AG1	OK	5.92269	16.0367	1.43705	-5.02415	5.0566e-07	1.12889e-05	yes
XLOC_002514	XLOC_002514	Nr2e1	10:42281746-42304589	FVA	AG1	OK	1.90282	5.21315	1.45402	-4.74362	2.09931e-06	4.20107e-05	yes
XLOC_002516	XLOC_002516	Sobp	10:42722208-42894367	FVA	AG1	OK	17.0055	32.6604	0.941538	-3.63304	0.0002801	0.00350244	yes
XLOC_002519	XLOC_002519	Aim1	10:43708900-43719167	FVA	AG1	OK	1.49328	0.407076	-1.87512	4.03141	5.54431e-05	0.000835649	yes
XLOC_002520	XLOC_002520	Lin28b	10:45096430-45206056	FVA	AG1	OK	5.42598	0.764932	-2.82648	4.35456	1.33337e-05	0.000228247	yes
XLOC_002527	XLOC_002527	Man1a	10:53624589-53796802	FVA	AG1	OK	3.13434	10.2917	1.71525	-7.71225	1.24345e-14	6.83632e-13	yes
XLOC_002533	XLOC_002533	Ddit4	10:59412417-59414734	FVA	AG1	OK	16.9926	25.59	0.590669	-3.92315	8.73992e-05	0.00124068	yes
XLOC_002538	XLOC_002538	Unc5b	10:60225333-60294299	FVA	AG1	OK	9.85853	6.15306	-0.680067	4.71555	2.41053e-06	4.76828e-05	yes
XLOC_002541	XLOC_002541	Adamts14	10:60668130-60675079	FVA	AG1	OK	0.132103	0.918476	2.79758	-4.54536	5.48404e-06	0.000101706	yes
XLOC_002543	XLOC_002543	Eif4ebp2	10:60891020-60915338	FVA	AG1	OK	10.9785	14.309	0.382233	-2.87147	0.00408564	0.0335919	yes
XLOC_002548	XLOC_002548	Hk1	10:61730729-61803379	FVA	AG1	OK	63.7436	83.1291	0.383073	-2.83535	0.0045776	0.036881	yes
XLOC_002549	XLOC_002549	Hkdc1	10:61845814-61874664	FVA	AG1	OK	0.346651	1.19572	1.78632	-5.05508	4.30205e-07	9.71673e-06	yes
XLOC_002556	XLOC_002556	Stox1	10:62121885-62130781	FVA	AG1	OK	1.27398	0.740448	-0.782872	2.78912	0.00528515	0.0416159	yes
XLOC_002558	XLOC_002558	Tet1	10:62267347-62327613	FVA	AG1	OK	1.40679	0.895485	-0.651666	2.93528	0.00333251	0.0285625	yes
XLOC_002560	XLOC_002560	Mypn	10:62584666-62585163	FVA	AG1	OK	1.19534	0.438571	-1.44653	3.01512	0.00256879	0.0230997	yes
XLOC_002568	XLOC_002568	Zfp365	10:67348799-67375567	FVA	AG1	OK	35.3326	72.0967	1.02893	-8.32132	0	0	yes
XLOC_002577	XLOC_002577	-	10:72402825-72407189	FVA	AG1	OK	2.88704	0.674844	-2.09697	5.06731	4.03486e-07	9.17159e-06	yes
XLOC_002578	XLOC_002578	-	10:72412170-72436458	FVA	AG1	OK	3.15378	0.900464	-1.80834	2.94849	0.00319333	0.0275608	yes
XLOC_002582	XLOC_002582	Bcr	10:74521110-74523643	FVA	AG1	OK	0.515745	1.70922	1.72861	-4.94072	7.78346e-07	1.68177e-05	yes
XLOC_002586	XLOC_002586	Gstt1,Gstt3	10:75236865-75261338	FVA	AG1	OK	37.4753	22.2716	-0.750736	4.16368	3.13163e-05	0.000496721	yes
XLOC_002587	XLOC_002587	Gstt2	10:75294532-75297444	FVA	AG1	OK	3.5809	1.11178	-1.68745	3.02486	0.00248745	0.0225256	yes
XLOC_002592	XLOC_002592	Dip2a	10:75716391-75807968	FVA	AG1	OK	22.8715	14.8057	-0.627397	6.24815	4.15339e-10	1.45059e-08	yes
XLOC_002595	XLOC_002595	Col6a2	10:76058503-76076068	FVA	AG1	OK	1.51051	3.69148	1.28916	-3.7357	0.000187192	0.00246751	yes
XLOC_002596	XLOC_002596	Col6a1	10:76175578-76183857	FVA	AG1	OK	3.46838	15.0171	2.11427	-7.74231	9.76996e-15	5.4099e-13	yes
XLOC_002598	XLOC_002598	Col18a1	10:76495102-76629252	FVA	AG1	OK	4.029	1.22327	-1.71968	4.88163	1.05211e-06	2.21898e-05	yes
XLOC_002599	XLOC_002599	Adarb1	10:76753097-76880980	FVA	AG1	OK	98.5248	28.0256	-1.81374	11.5467	0	0	yes
XLOC_002601	XLOC_002601	Lrrc3	10:77361795-77365266	FVA	AG1	OK	4.40289	1.32358	-1.734	6.11688	9.54253e-10	3.21532e-08	yes
XLOC_002602	XLOC_002602	Trpm2	10:77371615-77432637	FVA	AG1	OK	18.4965	10.8646	-0.767612	3.51169	0.000445274	0.00522922	yes
XLOC_002603	XLOC_002603	Pfkl	10:77441361-77472539	FVA	AG1	OK	20.5007	34.0281	0.731054	-5.65474	1.5608e-08	4.44065e-07	yes
XLOC_002609	XLOC_002609	Pdxk	10:77899489-77927772	FVA	AG1	OK	39.9851	30.1142	-0.40902	2.84564	0.00443222	0.0359783	yes
XLOC_002613	XLOC_002613	Ppap2c	10:78989131-78996496	FVA	AG1	OK	3.76002	1.40302	-1.42221	5.16972	2.34446e-07	5.58513e-06	yes
XLOC_002615	XLOC_002615	C2cd4c	10:79069406-79078402	FVA	AG1	OK	1.17444	2.8813	1.29475	-5.51621	3.46389e-08	9.43804e-07	yes
XLOC_002621	XLOC_002621	BC005764	10:79314047-79337390	FVA	AG1	OK	30.2807	15.046	-1.00901	5.9643	2.45682e-09	7.85015e-08	yes
XLOC_002622	XLOC_002622	Med16	10:79357778-79387198	FVA	AG1	OK	5.27136	11.3665	1.10854	-2.91503	0.00355658	0.0300925	yes
XLOC_002623	XLOC_002623	C030046I01Rik	10:79357778-79387198	FVA	AG1	OK	20.81	57.3802	1.46328	-8.60775	0	0	yes
XLOC_002637	XLOC_002637	Rexo1	10:80003680-80024524	FVA	AG1	OK	7.44263	10.545	0.50267	-3.08402	0.00204222	0.0192145	yes
XLOC_002638	XLOC_002638	Klf16	10:80028926-80041679	FVA	AG1	OK	5.9648	19.9045	1.73855	-3.04352	0.00233828	0.0214386	yes
XLOC_002642	XLOC_002642	Mobkl2a	10:80145877-80164669	FVA	AG1	OK	3.66661	2.12289	-0.788419	4.22868	2.35062e-05	0.000382059	yes
XLOC_002646	XLOC_002646	Lingo3	10:80295486-80306778	FVA	AG1	OK	3.23208	8.79204	1.44374	-7.20752	5.69766e-13	2.71258e-11	yes
XLOC_002650	XLOC_002650	Gng7	10:80408979-80477680	FVA	AG1	OK	17.9185	51.0871	1.5115	-11.0872	0	0	yes
XLOC_002651	XLOC_002651	Diras1	10:80482330-80488136	FVA	AG1	OK	39.2732	29.5177	-0.411965	3.22664	0.00125251	0.0128658	yes
XLOC_002662	XLOC_002662	Celf5	10:80921883-80945441	FVA	AG1	OK	31.9423	89.3577	1.48413	-9.66403	0	0	yes
XLOC_002665	XLOC_002665	Gna11	10:80991337-81007830	FVA	AG1	OK	26.3698	37.1377	0.493996	-3.84843	0.000118875	0.00163681	yes
XLOC_002672	XLOC_002672	Glt8d2	10:82107181-82153685	FVA	AG1	OK	1.95648	5.0217	1.35991	-6.76258	1.35556e-11	5.62203e-10	yes
XLOC_002673	XLOC_002673	Nfyb	10:82211293-82226918	FVA	AG1	OK	7.86114	15.9951	1.02482	-5.12089	3.04091e-07	7.10728e-06	yes
XLOC_002674	XLOC_002674	Slc41a2	10:82693579-82800715	FVA	AG1	OK	6.27534	4.03056	-0.638714	3.56586	0.00036267	0.00437897	yes
XLOC_002677	XLOC_002677	Nuak1	10:83833644-83903462	FVA	AG1	OK	4.90011	9.51493	0.957379	-3.54442	0.00039348	0.00469592	yes
XLOC_002699	XLOC_002699	Apaf1	10:90452070-90545311	FVA	AG1	OK	1.79663	5.63374	1.6488	-5.74722	9.07205e-09	2.662e-07	yes
XLOC_002702	XLOC_002702	-	10:90721321-90721975	FVA	AG1	OK	15.5543	6.63311	-1.22956	4.34514	1.3919e-05	0.000236822	yes
XLOC_002703	XLOC_002703	Mir135a-2,Rmst	10:91533786-91627553	FVA	AG1	OK	15.6511	4.48905	-1.80178	4.47075	7.79451e-06	0.00014002	yes
XLOC_002713	XLOC_002713	Plxnc1	10:94253609-94306657	FVA	AG1	OK	15.0181	7.51674	-0.998526	3.90079	9.58783e-05	0.00134902	yes
XLOC_002717	XLOC_002717	Nudt4	10:95009638-95026495	FVA	AG1	OK	44.6881	28.1048	-0.669071	3.99746	6.40253e-05	0.000942924	yes
XLOC_002728	XLOC_002728	Tmtc2	10:104624730-105011297	FVA	AG1	OK	3.70764	2.19893	-0.753697	4.25047	2.1332e-05	0.000349293	yes
XLOC_002734	XLOC_002734	Syt1	10:107934703-108448189	FVA	AG1	OK	206.621	279.12	0.433901	-3.1652	0.00154979	0.0153086	yes
XLOC_002740	XLOC_002740	Kcnc2	10:111706424-111903395	FVA	AG1	OK	4.61518	1.25586	-1.87772	5.52941	3.21308e-08	8.77787e-07	yes
XLOC_002741	XLOC_002741	Atxn7l3b	10:112362396-112366095	FVA	AG1	OK	33.9671	49.1702	0.533647	-4.27895	1.87778e-05	0.000311934	yes
XLOC_002742	XLOC_002742	Trhde	10:113833558-114254653	FVA	AG1	OK	1.53237	4.11931	1.42664	-7.76077	8.43769e-15	4.72297e-13	yes
XLOC_002747	XLOC_002747	Lgr5	10:115024382-115024798	FVA	AG1	OK	1.9448	0.451925	-2.10546	4.01605	5.91819e-05	0.000881262	yes
XLOC_002748	XLOC_002748	Kcnmb4	10:115851610-115910644	FVA	AG1	OK	6.66955	10.3363	0.632059	-4.17306	3.00541e-05	0.00047916	yes
XLOC_002750	XLOC_002750	Rab3ip	10:116342580-116387470	FVA	AG1	OK	7.59205	15.4633	1.02629	-6.0184	1.76151e-09	5.76557e-08	yes
XLOC_002754	XLOC_002754	Lyz2	10:116714393-116728250	FVA	AG1	OK	11.2126	6.91638	-0.697025	2.85042	0.00436615	0.0355388	yes
XLOC_002760	XLOC_002760	Iltifb	10:117726756-117730289	FVA	AG1	OK	1.80003	0	-1.79769e+308	-1.79769e+308	6.80474e-06	0.000123897	yes
XLOC_002761	XLOC_002761	Dyrk2	10:118292549-118306548	FVA	AG1	OK	4.30115	11.3337	1.39783	-8.50864	0	0	yes
XLOC_002762	XLOC_002762	-	10:118455066-118462327	FVA	AG1	OK	0.176036	0.772451	2.13357	-3.44801	0.000564732	0.00642456	yes
XLOC_002770	XLOC_002770	Rassf3	10:120847320-120969847	FVA	AG1	OK	12.6167	4.04257	-1.64199	9.10306	0	0	yes
XLOC_002773	XLOC_002773	Srgap1	10:121217949-121484488	FVA	AG1	OK	9.14523	3.18968	-1.51961	10.6683	0	0	yes
XLOC_002778	XLOC_002778	Slc16a7	10:124656299-124826576	FVA	AG1	OK	1.80273	2.99246	0.731147	-4.04987	5.12462e-05	0.000777322	yes
XLOC_002785	XLOC_002785	Arhgef25	10:126619302-126627092	FVA	AG1	OK	36.431	124.045	1.76763	-11.5813	0	0	yes
XLOC_002786	XLOC_002786	Dtx3	10:126627166-126633668	FVA	AG1	OK	70.4215	94.114	0.418394	-2.78189	0.00540426	0.0423917	yes
XLOC_002787	XLOC_002787	Pip4k2c	10:126634010-126648673	FVA	AG1	OK	17.8795	41.3903	1.21099	-9.29679	0	0	yes
XLOC_002790	XLOC_002790	Gli1	10:126766586-126774212	FVA	AG1	OK	2.52254	0.60538	-2.05897	2.85995	0.00423701	0.0346428	yes
XLOC_002792	XLOC_002792	Nxph4	10:126962525-126963850	FVA	AG1	OK	3.42024	0.830493	-2.04206	5.72933	1.00831e-08	2.93358e-07	yes
XLOC_002794	XLOC_002794	Nab2	10:127080033-127105912	FVA	AG1	OK	2.29572	6.47054	1.49494	-7.80678	5.77316e-15	3.28507e-13	yes
XLOC_002816	XLOC_002816	Cnksr3	10:3229421-3231146	FVA	AG1	OK	0.7884	0.0847602	-3.21747	3.98355	6.78922e-05	0.000990899	yes
XLOC_002817	XLOC_002817	-	10:3231229-3231619	FVA	AG1	OK	1.23031	0	-1.79769e+308	-1.79769e+308	0.00642987	0.0487653	yes
XLOC_002838	XLOC_002838	Plekhg1	10:6426304-6606183	FVA	AG1	OK	2.25949	0.044999	-5.64996	2.87412	0.00405158	0.0333918	yes
XLOC_002894	XLOC_002894	-	10:15030659-15031774	FVA	AG1	OK	0.874304	0.223827	-1.96575	2.86312	0.00419493	0.0343533	yes
XLOC_002933	XLOC_002933	-	10:21772453-21772865	FVA	AG1	OK	1.16815	0	-1.79769e+308	-1.79769e+308	0.0051994	0.0410347	yes
XLOC_002938	XLOC_002938	-	10:23496851-23498473	FVA	AG1	OK	0.288946	0.9205	1.67162	-3.35478	0.000794283	0.00863842	yes
XLOC_002945	XLOC_002945	Akap7	10:24888801-25027615	FVA	AG1	OK	0.789412	0.120784	-2.70835	3.23495	0.00121663	0.012543	yes
XLOC_002956	XLOC_002956	-	10:26415188-26415588	FVA	AG1	OK	3.0171	0.451076	-2.74172	2.77917	0.00544982	0.0426841	yes
XLOC_002957	XLOC_002957	-	10:26462191-26463490	FVA	AG1	OK	0.863245	0.130041	-2.7308	3.47755	0.000506013	0.00583823	yes
XLOC_003007	XLOC_003007	-	10:32448186-32450289	FVA	AG1	OK	0.160852	1.0317	2.68122	-4.96139	6.99898e-07	1.52772e-05	yes
XLOC_003014	XLOC_003014	-	10:32533257-32536458	FVA	AG1	OK	0.465251	1.85627	1.99633	-6.50274	7.88709e-11	3.01603e-09	yes
XLOC_003043	XLOC_003043	Amd1	10:40017420-40018645	FVA	AG1	OK	1.1508	0.192329	-2.58099	3.81418	0.000136637	0.00185249	yes
XLOC_003044	XLOC_003044	Amd1	10:40019248-40021104	FVA	AG1	OK	0.815539	0.19639	-2.05403	3.72962	0.00019177	0.00251605	yes
XLOC_003068	XLOC_003068	-	10:40539022-40540290	FVA	AG1	OK	0.151379	0.738929	2.28727	-3.02432	0.00249194	0.0225596	yes
XLOC_003103	XLOC_003103	Gm10812	10:43726071-43726522	FVA	AG1	OK	1.22036	0	-1.79769e+308	-1.79769e+308	0.00237619	0.0217154	yes
XLOC_003104	XLOC_003104	-	10:43726911-43727284	FVA	AG1	OK	1.49716	0	-1.79769e+308	-1.79769e+308	0.00443724	0.0359945	yes
XLOC_003145	XLOC_003145	-	10:58264989-58272705	FVA	AG1	OK	0.553759	1.08853	0.975046	-4.13131	3.60702e-05	0.000565447	yes
XLOC_003193	XLOC_003193	-	10:64468923-64470809	FVA	AG1	OK	0.70546	0.231451	-1.60786	3.08476	0.00203719	0.0191788	yes
XLOC_003212	XLOC_003212	-	10:72086036-72086486	FVA	AG1	OK	1.15744	0	-1.79769e+308	-1.79769e+308	0.00280281	0.0248426	yes
XLOC_003268	XLOC_003268	-	10:79229971-79234166	FVA	AG1	OK	0.716398	1.50376	1.06975	-4.12087	3.77446e-05	0.000589006	yes
XLOC_003291	XLOC_003291	Klf16	10:80027864-80028856	FVA	AG1	OK	0.214982	1.1249	2.3875	-3.25551	0.00113189	0.0117676	yes
XLOC_003320	XLOC_003320	-	10:81626562-81629612	FVA	AG1	OK	0.223502	0.504219	1.17376	-2.7595	0.0057889	0.0447907	yes
XLOC_003336	XLOC_003336	-	10:81905488-81908228	FVA	AG1	OK	0.814698	0.136251	-2.58	4.94827	7.4877e-07	1.62354e-05	yes
XLOC_003354	XLOC_003354	-	10:82937205-82947394	FVA	AG1	OK	1.02004	0.364202	-1.48581	6.56377	5.24638e-11	2.05193e-09	yes
XLOC_003355	XLOC_003355	Appl2	10:83062778-83111641	FVA	AG1	OK	7.60812	4.10987	-0.888446	2.73697	0.00620079	0.0473886	yes
XLOC_003371	XLOC_003371	Gm5174	10:86121190-86121666	FVA	AG1	OK	1.31483	0	-1.79769e+308	-1.79769e+308	0.000966211	0.0102358	yes
XLOC_003415	XLOC_003415	Gm16154	10:94071608-94072070	FVA	AG1	OK	0.990694	0	-1.79769e+308	-1.79769e+308	0.00434483	0.0353839	yes
XLOC_003416	XLOC_003416	Gm16154	10:94073325-94073874	FVA	AG1	OK	1.36254	0	-1.79769e+308	-1.79769e+308	0.000211038	0.00273977	yes
XLOC_003417	XLOC_003417	-	10:94074174-94085654	FVA	AG1	OK	0.927611	0	-1.79769e+308	-1.79769e+308	0.00338714	0.0289104	yes
XLOC_003434	XLOC_003434	-	10:95333000-95333438	FVA	AG1	OK	16.4395	29.3865	0.837986	-3.48497	0.000492186	0.00571283	yes
XLOC_003447	XLOC_003447	-	10:101875006-101880646	FVA	AG1	OK	0.567817	1.20716	1.08812	-4.31321	1.60901e-05	0.000271223	yes
XLOC_003457	XLOC_003457	-	10:106703845-106705966	FVA	AG1	OK	0.884252	0.353456	-1.32293	3.16781	0.00153594	0.0152108	yes
XLOC_003459	XLOC_003459	-	10:106707389-106708370	FVA	AG1	OK	1.16521	0.247232	-2.23666	3.22023	0.00128086	0.0131024	yes
XLOC_003466	XLOC_003466	Nap1l1	10:110910337-110924570	FVA	AG1	OK	0.654672	0.116139	-2.49491	3.56242	0.000367448	0.00442974	yes
XLOC_003481	XLOC_003481	-	10:114258422-114261083	FVA	AG1	OK	0.267906	0.797054	1.57295	-3.83853	0.000123772	0.00169442	yes
XLOC_003492	XLOC_003492	Cpsf6	10:116781686-116814006	FVA	AG1	OK	6.47504	3.18884	-1.02186	3.14347	0.00166957	0.0162836	yes
XLOC_003504	XLOC_003504	-	10:118850282-118852713	FVA	AG1	OK	0.154665	0.782879	2.33964	-4.52782	5.95949e-06	0.000109833	yes
XLOC_003505	XLOC_003505	-	10:118852979-118854586	FVA	AG1	OK	0.0831137	0.51779	2.63921	-3.02322	0.00250104	0.0226221	yes
XLOC_003533	XLOC_003533	-	10:122423981-122426600	FVA	AG1	OK	0.529304	1.20591	1.18796	-3.61402	0.000301489	0.00373214	yes
XLOC_003553	XLOC_003553	-	10:125573526-125575362	FVA	AG1	OK	0.158697	1.13799	2.84215	-4.88365	1.04142e-06	2.19943e-05	yes
XLOC_003563	XLOC_003563	Ctdsp2	10:126421298-126424878	FVA	AG1	OK	0.686163	0.323757	-1.08364	3.11099	0.00186464	0.0178536	yes
XLOC_003591	XLOC_003591	-	10:127987296-127987629	FVA	AG1	OK	11.3473	5.03971	-1.17094	2.72167	0.00649521	0.0491644	yes
XLOC_003614	XLOC_003614	Selm	11:3409738-3417432	FVA	AG1	OK	104.579	73.0482	-0.517669	3.09841	0.00194564	0.0184519	yes
XLOC_003617	XLOC_003617	Dusp18	11:3795190-3801391	FVA	AG1	OK	3.05514	10.6878	1.80666	-10.0384	0	0	yes
XLOC_003627	XLOC_003627	Zmat5	11:4601706-4646991	FVA	AG1	OK	7.01357	25.685	1.8727	-11.3964	0	0	yes
XLOC_003628	XLOC_003628	-	11:4647166-4651514	FVA	AG1	OK	0.160023	1.09338	2.77245	-6.16682	6.96773e-10	2.38415e-08	yes
XLOC_003633	XLOC_003633	Rasl10a	11:4956922-4965376	FVA	AG1	OK	5.66345	19.0623	1.75097	-7.11238	1.14064e-12	5.27599e-11	yes
XLOC_003648	XLOC_003648	Ramp3	11:6558299-6577482	FVA	AG1	OK	58.7861	2.03571	-4.85188	22.997	0	0	yes
XLOC_003649	XLOC_003649	Adcy1	11:6963663-7079763	FVA	AG1	OK	50.0983	83.9377	0.744557	-5.47348	4.41288e-08	1.18051e-06	yes
XLOC_003653	XLOC_003653	Vwc2	11:11164725-11169412	FVA	AG1	OK	5.23466	0.795814	-2.71759	5.04707	4.48644e-07	1.00889e-05	yes
XLOC_003661	XLOC_003661	Vstm2a	11:16157420-16187046	FVA	AG1	OK	10.4014	19.0819	0.875429	-4.9878	6.10694e-07	1.34588e-05	yes
XLOC_003662	XLOC_003662	Akt2-ps	11:16414368-16417320	FVA	AG1	OK	7.54119	13.2479	0.812899	-5.06721	4.03695e-07	9.17159e-06	yes
XLOC_003664	XLOC_003664	Cnrip1	11:16951449-16979695	FVA	AG1	OK	19.1219	33.3364	0.801875	-5.70827	1.14131e-08	3.29881e-07	yes
XLOC_003665	XLOC_003665	Wdr92	11:17111829-17134406	FVA	AG1	OK	106.294	292.112	1.45847	-11.4706	0	0	yes
XLOC_003669	XLOC_003669	Spred2	11:19824085-19924031	FVA	AG1	OK	10.9109	26.2215	1.26498	-7.38385	1.53877e-13	7.69335e-12	yes
XLOC_003671	XLOC_003671	Sertad2	11:20443263-20553106	FVA	AG1	OK	2.79681	4.52131	0.692959	-3.66121	0.000251029	0.00319847	yes
XLOC_003672	XLOC_003672	Peli1	11:20991491-21050437	FVA	AG1	OK	7.4936	12.2824	0.712865	-4.56453	5.00611e-06	9.37447e-05	yes
XLOC_003684	XLOC_003684	Usp34	11:23206885-23397981	FVA	AG1	OK	10.6542	6.03651	-0.81964	6.04814	1.46528e-09	4.83182e-08	yes
XLOC_003686	XLOC_003686	Bcl11a	11:23949040-24073276	FVA	AG1	OK	7.14183	43.5985	2.60991	-10.8319	0	0	yes
XLOC_003701	XLOC_003701	Nsg2	11:31900345-31959211	FVA	AG1	OK	227.817	304.789	0.419936	-2.84685	0.00441535	0.0358637	yes
XLOC_003706	XLOC_003706	Ubtd2	11:32355456-32420157	FVA	AG1	OK	3.48778	5.7104	0.711283	-4.10368	4.06626e-05	0.000631036	yes
XLOC_003713	XLOC_003713	Fam196b	11:34214728-34322620	FVA	AG1	OK	3.15559	0.377958	-3.06161	12.4942	0	0	yes
XLOC_003714	XLOC_003714	Slit3	11:34902556-35525630	FVA	AG1	OK	4.77661	20.551	2.10515	-10.106	0	0	yes
XLOC_003715	XLOC_003715	Pank3	11:35583301-35604863	FVA	AG1	OK	8.74697	5.34984	-0.709287	4.72303	2.32358e-06	4.614e-05	yes
XLOC_003719	XLOC_003719	Gabrb2	11:42233024-42446288	FVA	AG1	OK	43.4434	25.5152	-0.767779	6.31456	2.70929e-10	9.64419e-09	yes
XLOC_003723	XLOC_003723	Ccnjl	11:43342340-43401108	FVA	AG1	OK	1.1071	4.39352	1.9886	-4.2776	1.88918e-05	0.000313491	yes
XLOC_003727	XLOC_003727	Ebf1	11:44721403-44820698	FVA	AG1	OK	2.45942	0.679641	-1.85547	3.71481	0.00020336	0.00264789	yes
XLOC_003757	XLOC_003757	-	11:51712434-51717152	FVA	AG1	OK	0.0874915	1.71786	4.29533	-3.10979	0.00187218	0.0178926	yes
XLOC_003770	XLOC_003770	Gm9945	11:53289904-53294556	FVA	AG1	OK	4.78546	26.8275	2.48698	-15.3282	0	0	yes
XLOC_003782	XLOC_003782	Gpx3	11:54716210-54723880	FVA	AG1	OK	21.8999	1.9281	-3.50567	16.1507	0	0	yes
XLOC_003786	XLOC_003786	Gria1	11:56824852-57146110	FVA	AG1	OK	45.4334	135.561	1.57712	-9.51763	0	0	yes
XLOC_003788	XLOC_003788	Galnt10	11:57459149-57600986	FVA	AG1	OK	3.4076	2.04914	-0.733738	2.91551	0.00355103	0.0300781	yes
XLOC_003799	XLOC_003799	Olfr316	11:58570304-58572786	FVA	AG1	OK	0	0.576743	1.79769e+308	1.79769e+308	3.62768e-07	8.30282e-06	yes
XLOC_003802	XLOC_003802	Trim17	11:58768085-58805053	FVA	AG1	OK	12.0921	22.362	0.886987	-4.0619	4.8675e-05	0.000742972	yes
XLOC_003804	XLOC_003804	Trim11	11:58768085-58805053	FVA	AG1	OK	10.3085	17.0813	0.728576	-3.17426	0.00150218	0.0149338	yes
XLOC_003808	XLOC_003808	Wnt9a	11:59141063-59147052	FVA	AG1	OK	3.49863	1.35295	-1.37068	4.35082	1.35631e-05	0.00023166	yes
XLOC_003811	XLOC_003811	Mprip	11:59550571-59591552	FVA	AG1	OK	8.28761	14.4086	0.797898	-5.30086	1.15258e-07	2.86965e-06	yes
XLOC_003817	XLOC_003817	4933439F18Rik	11:60214167-60258918	FVA	AG1	OK	12.1854	16.9445	0.475667	-3.00079	0.00269283	0.0240098	yes
XLOC_003826	XLOC_003826	Kcnj12	11:60835640-60886762	FVA	AG1	OK	8.14269	1.79817	-2.17897	12.1244	0	0	yes
XLOC_003829	XLOC_003829	Mfap4	11:61298405-61302196	FVA	AG1	OK	0.332445	2.37934	2.83937	-5.19622	2.03379e-07	4.89028e-06	yes
XLOC_003841	XLOC_003841	Pmp22	11:62942577-62973116	FVA	AG1	OK	21.2558	8.45913	-1.32927	6.43916	1.20137e-10	4.48111e-09	yes
XLOC_003844	XLOC_003844	Hs3st3a1	11:64335945-64336304	FVA	AG1	OK	0.933364	0.145014	-2.68625	3.04123	0.00235613	0.0215703	yes
XLOC_003847	XLOC_003847	-	11:66339805-66376540	FVA	AG1	OK	0.617081	1.54706	1.326	-3.03382	0.00241477	0.0219963	yes
XLOC_003849	XLOC_003849	Pirt	11:66739347-66743350	FVA	AG1	OK	0.196851	0.561053	1.51103	-3.87004	0.000108818	0.00151317	yes
XLOC_003853	XLOC_003853	Gas7	11:67269048-67502667	FVA	AG1	OK	16.0907	66.4163	2.04531	-13.2111	0	0	yes
XLOC_003858	XLOC_003858	Myh10	11:68505423-68630136	FVA	AG1	OK	43.0144	31.8785	-0.432233	2.8539	0.00431864	0.0352077	yes
XLOC_003864	XLOC_003864	Vamp2	11:68901995-68905893	FVA	AG1	OK	272.609	374.274	0.457264	-3.49644	0.000471502	0.00548925	yes
XLOC_003867	XLOC_003867	Aloxe3	11:68939662-68962614	FVA	AG1	OK	1.77476	3.54103	0.99655	-3.06859	0.00215068	0.02007	yes
XLOC_003868	XLOC_003868	Alox12b	11:68970498-68983312	FVA	AG1	OK	0.328393	3.37359	3.36079	-9.25172	0	0	yes
XLOC_003870	XLOC_003870	Kcnab3	11:69139669-69146553	FVA	AG1	OK	18.8572	11.5263	-0.71019	3.61457	0.000300845	0.00372715	yes
XLOC_003871	XLOC_003871	A030009H04Rik	11:69154261-69156276	FVA	AG1	OK	53.5527	39.3952	-0.44294	3.40296	0.0006666	0.00743829	yes
XLOC_003885	XLOC_003885	Ybx2	11:69749666-69755096	FVA	AG1	OK	1.82421	4.04652	1.14941	-4.60017	4.22152e-06	8.00716e-05	yes
XLOC_003889	XLOC_003889	Dlg4	11:69831594-69861086	FVA	AG1	OK	66.9777	129.36	0.949639	-6.5921	4.3364e-11	1.71997e-09	yes
XLOC_003892	XLOC_003892	Gm12312	11:70171588-70172196	FVA	AG1	OK	8.13098	13.8106	0.764275	-3.02394	0.00249507	0.0225759	yes
XLOC_003894	XLOC_003894	Arrb2	11:70246183-70254360	FVA	AG1	OK	28.366	40.8866	0.527467	-2.82981	0.00465755	0.0374276	yes
XLOC_003898	XLOC_003898	Mink1	11:70376375-70428049	FVA	AG1	OK	48.9684	94.2701	0.94495	-6.26253	3.78787e-10	1.333e-08	yes
XLOC_003901	XLOC_003901	Eno3	11:70468649-70476015	FVA	AG1	OK	4.15971	2.72208	-0.611774	2.72003	0.00652752	0.0493726	yes
XLOC_003921	XLOC_003921	Camkk1	11:72832522-72855594	FVA	AG1	OK	28.801	71.1815	1.30538	-7.99872	1.33227e-15	7.9776e-14	yes
XLOC_003935	XLOC_003935	Rtn4rl1	11:75007285-75088482	FVA	AG1	OK	6.41708	8.24219	0.36111	-2.73368	0.00626301	0.047746	yes
XLOC_003937	XLOC_003937	2210403K04Rik,Tlcd2	11:75275091-75280236	FVA	AG1	OK	11.0663	19.2405	0.797974	-3.30679	0.000943711	0.0100409	yes
XLOC_003944	XLOC_003944	Crk	11:75492786-75522037	FVA	AG1	OK	17.8273	24.2064	0.441304	-3.01771	0.00254692	0.022923	yes
XLOC_003945	XLOC_003945	Ywhae	11:75546285-75609472	FVA	AG1	OK	120.471	158.729	0.397881	-2.94147	0.00326655	0.028122	yes
XLOC_003952	XLOC_003952	Gm16727	11:76435687-76436347	FVA	AG1	OK	2.71073	0.567345	-2.25638	3.72812	0.000192915	0.00252694	yes
XLOC_003953	XLOC_003953	Bhlha9	11:76485890-76487300	FVA	AG1	OK	0.37992	1.74546	2.19984	-4.78197	1.7359e-06	3.53332e-05	yes
XLOC_003959	XLOC_003959	Git1	11:77306969-77326806	FVA	AG1	OK	33.3318	57.245	0.780252	-5.13034	2.89226e-07	6.78035e-06	yes
XLOC_003964	XLOC_003964	Sez6	11:77744410-77792568	FVA	AG1	OK	27.9674	55.1721	0.980191	-7.03708	1.9631e-12	8.85485e-11	yes
XLOC_003966	XLOC_003966	Dhrs13	11:77845848-77851368	FVA	AG1	OK	4.86169	1.92882	-1.33374	3.98476	6.75477e-05	0.000986337	yes
XLOC_003969	XLOC_003969	Tlcd1	11:77990411-77997079	FVA	AG1	OK	11.3428	7.85884	-0.529394	2.95587	0.00311785	0.0269804	yes
XLOC_003975	XLOC_003975	Aldoc	11:78136261-78141517	FVA	AG1	OK	283.371	216.264	-0.389896	2.97881	0.00289368	0.0254799	yes
XLOC_003977	XLOC_003977	Unc119	11:78157036-78162709	FVA	AG1	OK	21.9637	13.9097	-0.659033	3.95646	7.60684e-05	0.00109324	yes
XLOC_003980	XLOC_003980	Sebox	11:78316677-78318575	FVA	AG1	OK	0.505704	2.81642	2.4775	-6.50795	7.61808e-11	2.91677e-09	yes
XLOC_004010	XLOC_004010	Rasl10b	11:83222530-83236733	FVA	AG1	OK	21.4922	38.7414	0.850065	-6.51484	7.27691e-11	2.79307e-09	yes
XLOC_004011	XLOC_004011	Taf15	11:83286601-83320246	FVA	AG1	OK	28.6555	40.3791	0.494797	-3.18164	0.00146442	0.0146244	yes
XLOC_004018	XLOC_004018	Acaca	11:84213057-84215250	FVA	AG1	OK	52.6819	15.1674	-1.79633	2.89981	0.00373387	0.0314015	yes
XLOC_004019	XLOC_004019	1500016L03Rik	11:84345754-84349306	FVA	AG1	OK	3.27556	0.278067	-3.55824	3.85929	0.000113717	0.00156998	yes
XLOC_004021	XLOC_004021	Car4	11:84770706-84779550	FVA	AG1	OK	23.9233	40.3456	0.753995	-3.05677	0.00223738	0.0207102	yes
XLOC_004028	XLOC_004028	Tubd1	11:86358425-86381435	FVA	AG1	OK	1.95819	3.30517	0.755202	-3.19876	0.0013802	0.0139046	yes
XLOC_004033	XLOC_004033	-	11:87172753-87175255	FVA	AG1	OK	0.604737	1.51229	1.32235	-3.55399	0.000379437	0.00454462	yes
XLOC_004034	XLOC_004034	2004-09-01	11:87391806-87405070	FVA	AG1	OK	161.384	75.7348	-1.09147	5.57095	2.53357e-08	6.99574e-07	yes
XLOC_004044	XLOC_004044	Cuedc1	11:87912799-88010383	FVA	AG1	OK	4.0887	1.10666	-1.88542	4.38529	1.15834e-05	0.000200619	yes
XLOC_004046	XLOC_004046	-	11:88066909-88070182	FVA	AG1	OK	1.25838	0.0267404	-5.5564	3.83381	0.000126175	0.00172349	yes
XLOC_004052	XLOC_004052	Mmd	11:90110795-90139980	FVA	AG1	OK	68.8875	243.304	1.82045	-4.06894	4.72278e-05	0.000724191	yes
XLOC_004057	XLOC_004057	Spag9	11:93857552-93987408	FVA	AG1	OK	56.2929	42.034	-0.421394	3.029	0.00245362	0.0222518	yes
XLOC_004065	XLOC_004065	Ppp1r9b	11:94852083-94869454	FVA	AG1	OK	93.9801	166.276	0.823149	-5.92404	3.14123e-09	9.86359e-08	yes
XLOC_004070	XLOC_004070	Spop	11:95275384-95358414	FVA	AG1	OK	18.2737	24.1429	0.401826	-3.21424	0.0013079	0.0133064	yes
XLOC_004081	XLOC_004081	Scrn2	11:96891216-96895256	FVA	AG1	OK	3.03808	1.65224	-0.878739	3.03604	0.00239706	0.0218672	yes
XLOC_004086	XLOC_004086	Socs7	11:97224016-97259857	FVA	AG1	OK	15.6945	24.3059	0.631042	-3.37921	0.000726937	0.00798184	yes
XLOC_004104	XLOC_004104	Thra	11:98603109-98636781	FVA	AG1	OK	2.01233	6.80658	1.75807	-3.96332	7.39134e-05	0.00106619	yes
XLOC_004106	XLOC_004106	Rapgefl1	11:98698056-98717479	FVA	AG1	OK	8.9032	32.8476	1.88339	-11.7385	0	0	yes
XLOC_004108	XLOC_004108	Rara	11:98789114-98836230	FVA	AG1	OK	2.16267	4.25191	0.975296	-3.0138	0.00258001	0.0231871	yes
XLOC_004109	XLOC_004109	Igfbp4	11:98902003-98914043	FVA	AG1	OK	5.53201	37.6471	2.76667	-13.4073	0	0	yes
XLOC_004110	XLOC_004110	A830036E02Rik,Krt20	11:99276997-99299698	FVA	AG1	OK	3.15213	5.41485	0.780596	-3.47469	0.000511447	0.00588994	yes
XLOC_004111	XLOC_004111	Gm11560	11:99793576-99794548	FVA	AG1	OK	20.6188	31.7035	0.620678	-3.63183	0.000281423	0.00351756	yes
XLOC_004115	XLOC_004115	Cnp	11:100436237-100482574	FVA	AG1	OK	20.7169	14.2752	-0.537295	3.92162	8.7956e-05	0.00124663	yes
XLOC_004123	XLOC_004123	Vps25	11:101114788-101120936	FVA	AG1	OK	5.19952	12.1714	1.22704	-5.84344	5.11325e-09	1.56735e-07	yes
XLOC_004131	XLOC_004131	Rnd2	11:101329590-101336637	FVA	AG1	OK	59.8002	24.2551	-1.30186	7.59901	2.9754e-14	1.59331e-12	yes
XLOC_004134	XLOC_004134	Rdm1	11:101489192-101497491	FVA	AG1	OK	4.68225	2.88313	-0.699565	2.74651	0.00602335	0.0462498	yes
XLOC_004141	XLOC_004141	Asb16	11:102137620-102140766	FVA	AG1	OK	2.92402	0.875105	-1.74043	6.34472	2.22831e-10	8.09051e-09	yes
XLOC_004147	XLOC_004147	Adam11	11:102622855-102642455	FVA	AG1	OK	38.7753	66.4438	0.776996	-4.83579	1.32621e-06	2.74646e-05	yes
XLOC_004150	XLOC_004150	Dcakd	11:102844557-102889668	FVA	AG1	OK	0.736295	1.62585	1.14284	-2.90173	0.00371106	0.0312522	yes
XLOC_004151	XLOC_004151	Nmt1	11:102889699-102930468	FVA	AG1	OK	26.7618	46.465	0.795969	-5.69058	1.26609e-08	3.63904e-07	yes
XLOC_004154	XLOC_004154	Hexim2	11:102977065-102994153	FVA	AG1	OK	5.31193	2.64156	-1.00785	3.69627	0.000218792	0.00283061	yes
XLOC_004155	XLOC_004155	Fmnl1	11:103032449-103063263	FVA	AG1	OK	13.0996	45.8427	1.80717	-7.78639	6.88338e-15	3.88817e-13	yes
XLOC_004156	XLOC_004156	Rprml	11:103502995-103512094	FVA	AG1	OK	0.561914	8.41477	3.9045	-4.84807	1.2467e-06	2.58527e-05	yes
XLOC_004158	XLOC_004158	Wnt3	11:103635380-103679315	FVA	AG1	OK	7.23686	0.657137	-3.4611	11.0777	0	0	yes
XLOC_004172	XLOC_004172	Dcaf7	11:105898121-105920731	FVA	AG1	OK	32.2436	41.1658	0.35243	-2.87546	0.00403433	0.0332762	yes
XLOC_004174	XLOC_004174	Map3k3	11:105946147-106022397	FVA	AG1	OK	4.33808	8.50417	0.971115	-5.2699	1.36498e-07	3.35255e-06	yes
XLOC_004192	XLOC_004192	Kcnj2	11:110927481-110938135	FVA	AG1	OK	1.45262	2.33911	0.687305	-3.38055	0.00072342	0.0079517	yes
XLOC_004194	XLOC_004194	Sox9	11:112643490-112649068	FVA	AG1	OK	4.82949	6.82679	0.499338	-3.03286	0.00242246	0.0220534	yes
XLOC_004201	XLOC_004201	Ttyh2	11:114536781-114582359	FVA	AG1	OK	17.235	9.95933	-0.791221	5.59207	2.24384e-08	6.24595e-07	yes
XLOC_004206	XLOC_004206	Rab37	11:114952617-115023547	FVA	AG1	OK	21.5143	0.883349	-4.60617	13.9478	0	0	yes
XLOC_004207	XLOC_004207	Slc9a3r1	11:115024612-115042495	FVA	AG1	OK	25.2691	18.8111	-0.425788	2.93817	0.00330157	0.0283603	yes
XLOC_004221	XLOC_004221	Itgb4	11:115844956-115874017	FVA	AG1	OK	1.92683	0.765482	-1.33179	2.982	0.0028637	0.0253025	yes
XLOC_004224	XLOC_004224	Evpl	11:116081826-116099382	FVA	AG1	OK	1.89952	0.693193	-1.45431	4.26467	2.00202e-05	0.000330088	yes
XLOC_004230	XLOC_004230	Cygb	11:116497215-116529753	FVA	AG1	OK	1.35743	3.64439	1.4248	-3.38639	0.000708199	0.0078094	yes
XLOC_004236	XLOC_004236	Sec14l1	11:116976457-117020720	FVA	AG1	OK	20.1055	58.4419	1.53941	-8.96764	0	0	yes
XLOC_004237	XLOC_004237	2009-09-01	11:117061048-117223629	FVA	AG1	OK	9.3949	33.7445	1.8447	-8.79137	0	0	yes
XLOC_004247	XLOC_004247	Gaa	11:119129191-119146859	FVA	AG1	OK	148.423	98.9063	-0.585584	3.97578	7.01502e-05	0.00101856	yes
XLOC_004249	XLOC_004249	Slc26a11	11:119204465-119242351	FVA	AG1	OK	5.22614	2.69572	-0.955074	3.05115	0.00227963	0.0210131	yes
XLOC_004256	XLOC_004256	Gm11766	11:119793947-119803998	FVA	AG1	OK	0.1339	1.25041	3.22317	-5.20662	1.92307e-07	4.63486e-06	yes
XLOC_004257	XLOC_004257	Baiap2	11:119804352-119868153	FVA	AG1	OK	13.7024	82.8492	2.59606	-15.4989	0	0	yes
XLOC_004269	XLOC_004269	Gm11768	11:120507350-120509876	FVA	AG1	OK	3.00227	1.26142	-1.251	5.09658	3.45844e-07	7.9508e-06	yes
XLOC_004270	XLOC_004270	Aspscr1	11:120534395-120570811	FVA	AG1	OK	19.0225	12.7709	-0.574842	2.80584	0.00501861	0.0398829	yes
XLOC_004288	XLOC_004288	Smtn	11:3417539-3439258	FVA	AG1	OK	5.97983	2.24092	-1.41601	6.47199	9.67193e-11	3.64888e-09	yes
XLOC_004290	XLOC_004290	Gm16518	11:3597078-3598982	FVA	AG1	OK	0.141719	0.667141	2.23496	-3.60329	0.000314218	0.00386801	yes
XLOC_004291	XLOC_004291	Osbp2	11:3601925-3763887	FVA	AG1	OK	9.30158	14.669	0.657222	-4.06985	4.70439e-05	0.00072173	yes
XLOC_004296	XLOC_004296	Mtfp1	11:3991415-3995947	FVA	AG1	OK	23.2085	38.1549	0.717218	-5.09278	3.5285e-07	8.09381e-06	yes
XLOC_004297	XLOC_004297	Sec14l2	11:3996964-4018927	FVA	AG1	OK	12.695	25.5498	1.00906	-5.34916	8.83617e-08	2.24154e-06	yes
XLOC_004301	XLOC_004301	Cabp7	11:4601706-4646991	FVA	AG1	OK	3.71863	18.834	2.3405	-13.9139	0	0	yes
XLOC_004303	XLOC_004303	Nefh	11:4838517-4847472	FVA	AG1	OK	54.1352	15.0967	-1.84233	12.0402	0	0	yes
XLOC_004304	XLOC_004304	Gas2l1	11:4956922-4965376	FVA	AG1	OK	0.248593	0.897561	1.85223	-4.47981	7.47095e-06	0.000134907	yes
XLOC_004317	XLOC_004317	Gck	11:5800820-5850068	FVA	AG1	OK	3.98164	1.0246	-1.95831	4.86352	1.15319e-06	2.41077e-05	yes
XLOC_004318	XLOC_004318	Camk2b	11:5855717-5966395	FVA	AG1	OK	98.3444	225.498	1.1972	-8.25179	2.22045e-16	1.40015e-14	yes
XLOC_004329	XLOC_004329	Igfbp3	11:7106095-7113583	FVA	AG1	OK	3.37848	7.44954	1.14078	-5.50601	3.6706e-08	9.96609e-07	yes
XLOC_004334	XLOC_004334	Ddc	11:11714108-11790608	FVA	AG1	OK	13.1225	2.17157	-2.59522	7.56406	3.90799e-14	2.06408e-12	yes
XLOC_004335	XLOC_004335	Grb10	11:11830509-11937225	FVA	AG1	OK	26.2208	6.74396	-1.95904	11.6207	0	0	yes
XLOC_004336	XLOC_004336	Cobl	11:12136678-12364747	FVA	AG1	OK	9.50501	4.49349	-1.08085	5.79399	6.87336e-09	2.06589e-07	yes
XLOC_004338	XLOC_004338	Gm12663	11:16534948-16536152	FVA	AG1	OK	18.2902	12.342	-0.567497	3.20413	0.00135469	0.0137057	yes
XLOC_004340	XLOC_004340	Plek	11:16871315-16908812	FVA	AG1	OK	3.89091	2.56574	-0.600733	3.22832	0.00124521	0.0127993	yes
XLOC_004345	XLOC_004345	Meis1	11:18914318-18918958	FVA	AG1	OK	2.15635	0.527356	-2.03174	5.1002	3.39288e-07	7.80589e-06	yes
XLOC_004347	XLOC_004347	Actr2	11:19977064-20012927	FVA	AG1	OK	54.2808	84.7329	0.642481	-5.19289	2.07053e-07	4.97088e-06	yes
XLOC_004354	XLOC_004354	Mdh1	11:21456412-21471992	FVA	AG1	OK	537.066	374.717	-0.519297	3.77141	0.000162326	0.00216561	yes
XLOC_004365	XLOC_004365	Papolg	11:23760107-23795275	FVA	AG1	OK	2.73379	4.08765	0.580368	-3.38992	0.000699133	0.0077315	yes
XLOC_004367	XLOC_004367	5730522E02Rik	11:25502522-25552065	FVA	AG1	OK	0.843937	4.42542	2.39061	-2.84067	0.00450183	0.0364321	yes
XLOC_004369	XLOC_004369	Ccdc85a	11:28285704-28484342	FVA	AG1	OK	12.1076	17.5269	0.533665	-3.86029	0.000113251	0.00156565	yes
XLOC_004375	XLOC_004375	Acyp2	11:30401637-30533724	FVA	AG1	OK	10.6727	6.21197	-0.780799	2.72707	0.00638985	0.0485334	yes
XLOC_004380	XLOC_004380	Stc2	11:31257791-31270326	FVA	AG1	OK	0.588883	2.05837	1.80545	-3.5855	0.00033643	0.00410408	yes
XLOC_004394	XLOC_004394	Kcnip1	11:33529390-33743534	FVA	AG1	OK	19.7264	8.18211	-1.26959	6.22997	4.66536e-10	1.61062e-08	yes
XLOC_004397	XLOC_004397	Pank3	11:35583301-35604863	FVA	AG1	OK	0	3.22416	1.79769e+308	1.79769e+308	6.97758e-20	4.52927e-18	yes
XLOC_004402	XLOC_004402	Mat2b	11:40492812-40508579	FVA	AG1	OK	31.2594	46.5367	0.57408	-3.30788	0.000940055	0.0100054	yes
XLOC_004411	XLOC_004411	Adra1b	11:43588132-43649883	FVA	AG1	OK	11.7789	0.81649	-3.85062	17.1896	0	0	yes
XLOC_004414	XLOC_004414	Lsm11	11:45741768-45758377	FVA	AG1	OK	4.46252	6.46839	0.535549	-3.51692	0.00043659	0.00514288	yes
XLOC_004417	XLOC_004417	Nipal4	11:45962030-45979960	FVA	AG1	OK	3.27126	1.71055	-0.935388	4.02247	5.75908e-05	0.000861298	yes
XLOC_004418	XLOC_004418	Cyfip2	11:46007198-46125979	FVA	AG1	OK	106.092	161.857	0.609409	-4.0887	4.33791e-05	0.000669829	yes
XLOC_004423	XLOC_004423	Gm12183	11:48565108-48567270	FVA	AG1	OK	91.0905	123.13	0.434809	-3.54091	0.000398753	0.00474602	yes
XLOC_004442	XLOC_004442	Rmnd5b	11:51433147-51449437	FVA	AG1	OK	12.2536	21.1489	0.787375	-3.56435	0.000364756	0.00440072	yes
XLOC_004443	XLOC_004443	N4bp3	11:51455893-51471158	FVA	AG1	OK	2.06338	3.93614	0.931776	-3.042	0.00235014	0.0215219	yes
XLOC_004458	XLOC_004458	Cdc42se2	11:54530690-54601192	FVA	AG1	OK	30.7693	61.1813	0.9916	-7.79475	6.43929e-15	3.65738e-13	yes
XLOC_004464	XLOC_004464	Sparc	11:55207294-55233718	FVA	AG1	OK	301.428	85.5822	-1.81643	12.3938	0	0	yes
XLOC_004466	XLOC_004466	Glra1	11:55318508-55387914	FVA	AG1	OK	3.21087	0	-1.79769e+308	-1.79769e+308	6.74228e-11	2.60404e-09	yes
XLOC_004477	XLOC_004477	Zfp39	11:58701617-58717719	FVA	AG1	OK	1.40241	2.40939	0.780765	-3.51022	0.00044773	0.00525208	yes
XLOC_004491	XLOC_004491	Pld6	11:59597842-59598754	FVA	AG1	OK	1.31116	0.367716	-1.83418	2.97302	0.00294889	0.0258405	yes
XLOC_004509	XLOC_004509	Aldh3a2	11:61055591-61080923	FVA	AG1	OK	0.405772	0.770661	0.925428	-3.30299	0.000956613	0.0101537	yes
XLOC_004510	XLOC_004510	Slc47a1	11:61182787-61186929	FVA	AG1	OK	0.341911	1.12418	1.71718	-4.38703	1.14911e-05	0.000199243	yes
XLOC_004511	XLOC_004511	Rnf112	11:61261768-61267694	FVA	AG1	OK	107.791	198.54	0.881197	-5.82896	5.57724e-09	1.69612e-07	yes
XLOC_004512	XLOC_004512	Mapk7	11:61302268-61307929	FVA	AG1	OK	7.27827	11.0394	0.600991	-2.88217	0.00394949	0.0327948	yes
XLOC_004513	XLOC_004513	Epn2	11:61316785-61393201	FVA	AG1	OK	11.2335	17.2101	0.615452	-4.4746	7.65529e-06	0.00013784	yes
XLOC_004516	XLOC_004516	Akap10	11:61678701-61743768	FVA	AG1	OK	6.87606	5.23763	-0.392668	2.80371	0.00505175	0.0400951	yes
XLOC_004531	XLOC_004531	Shisa6	11:66018562-66339323	FVA	AG1	OK	4.9264	14.4395	1.55141	-11.6594	0	0	yes
XLOC_004536	XLOC_004536	Ntn1	11:68022804-68199573	FVA	AG1	OK	2.73968	1.31353	-1.06056	5.39	7.04585e-08	1.82331e-06	yes
XLOC_004539	XLOC_004539	Arhgef15	11:68756654-68771129	FVA	AG1	OK	9.58722	3.02279	-1.66523	7.50023	6.37268e-14	3.27626e-12	yes
XLOC_004547	XLOC_004547	Chd3	11:69156715-69188126	FVA	AG1	OK	85.642	130.058	0.602767	-4.08953	4.3225e-05	0.000667783	yes
XLOC_004550	XLOC_004550	Kdm6b	11:69210928-69229665	FVA	AG1	OK	8.91242	13.29	0.57645	-2.85602	0.00428987	0.0350101	yes
XLOC_004554	XLOC_004554	Atp1b2	11:69413042-69419526	FVA	AG1	OK	173.205	120.289	-0.525977	4.21818	2.46282e-05	0.000399455	yes
XLOC_004556	XLOC_004556	Cd68,Eif4a1	11:69477718-69495424	FVA	AG1	OK	14.9252	21.2403	0.509053	-2.77222	0.00556754	0.0433971	yes
XLOC_004558	XLOC_004558	Polr2a	11:69547498-69572201	FVA	AG1	OK	17.6939	25.2213	0.511386	-4.08777	4.35549e-05	0.000672207	yes
XLOC_004576	XLOC_004576	Gm12319	11:70468649-70476015	FVA	AG1	OK	66.6251	111.901	0.748079	-5.38112	7.40219e-08	1.90912e-06	yes
XLOC_004577	XLOC_004577	Camta2	11:70477268-70509517	FVA	AG1	OK	33.7732	85.9079	1.34691	-9.96071	0	0	yes
XLOC_004580	XLOC_004580	Dhx33	11:70797593-70818130	FVA	AG1	OK	7.99259	15.0607	0.914059	-5.67157	1.41494e-08	4.04057e-07	yes
XLOC_004582	XLOC_004582	6330403K07Rik	11:70844651-70847307	FVA	AG1	OK	79.8511	56.8752	-0.489514	3.94564	7.95879e-05	0.00114059	yes
XLOC_004584	XLOC_004584	Gm12326	11:71552964-71554024	FVA	AG1	OK	1.42746	0.379051	-1.91299	3.44751	0.000565777	0.00643408	yes
XLOC_004595	XLOC_004595	Aspa	11:73116906-73138154	FVA	AG1	OK	9.62824	4.87991	-0.980418	4.38289	1.17113e-05	0.000202606	yes
XLOC_004600	XLOC_004600	Srr	11:74713007-74977986	FVA	AG1	OK	11.9068	24.6423	1.04935	-6.2234	4.86501e-10	1.6758e-08	yes
XLOC_004602	XLOC_004602	Dph1	11:74985997-75004046	FVA	AG1	OK	4.19453	8.02299	0.93563	-3.85967	0.00011354	0.0015688	yes
XLOC_004609	XLOC_004609	Doc2b	11:75546285-75609472	FVA	AG1	OK	5.22948	17.7494	1.76303	-4.03635	5.4289e-05	0.000819854	yes
XLOC_004611	XLOC_004611	Fam101b	11:75832693-75841214	FVA	AG1	OK	8.17285	4.05435	-1.01137	5.97827	2.25519e-09	7.23582e-08	yes
XLOC_004614	XLOC_004614	Abr	11:76230231-76391513	FVA	AG1	OK	82.1734	134.741	0.713451	-4.65173	3.29166e-06	6.38855e-05	yes
XLOC_004619	XLOC_004619	Ssh2	11:77029730-77273722	FVA	AG1	OK	0.502759	2.1452	2.09317	-4.46151	8.13831e-06	0.000145772	yes
XLOC_004623	XLOC_004623	Pipox	11:77694152-77707208	FVA	AG1	OK	2.29347	0.787485	-1.54221	2.96229	0.00305365	0.026548	yes
XLOC_004629	XLOC_004629	Supt6h	11:78008063-78068988	FVA	AG1	OK	21.4519	31.1439	0.537844	-4.27289	1.92958e-05	0.00031905	yes
XLOC_004635	XLOC_004635	Nlk	11:78380667-78511113	FVA	AG1	OK	8.68041	14.9583	0.785109	-3.1558	0.00160061	0.0156902	yes
XLOC_004638	XLOC_004638	Ksr1	11:78826934-78960086	FVA	AG1	OK	11.9137	37.1181	1.6395	-8.21996	2.22045e-16	1.40015e-14	yes
XLOC_004659	XLOC_004659	Lhx1	11:84331849-84339004	FVA	AG1	OK	0.911439	0.0650816	-3.80782	6.36782	1.91738e-10	7.01935e-09	yes
XLOC_004677	XLOC_004677	Ppm1e	11:87040397-87172577	FVA	AG1	OK	35.0133	69.4225	0.987501	-6.8043	1.01543e-11	4.26288e-10	yes
XLOC_004681	XLOC_004681	Dynll2	11:87792797-87801008	FVA	AG1	OK	248.662	191.003	-0.380593	3.02231	0.00250856	0.0226746	yes
XLOC_004689	XLOC_004689	4932411E22Rik	11:89248250-89273448	FVA	AG1	OK	1.52684	0.185839	-3.03842	9.68426	0	0	yes
XLOC_004690	XLOC_004690	Ankfn1	11:89366484-89387906	FVA	AG1	OK	2.75531	0.241246	-3.51364	2.84775	0.0044029	0.0358096	yes
XLOC_004692	XLOC_004692	Hlf	11:90197664-90252212	FVA	AG1	OK	34.8145	24.7317	-0.493325	3.46052	0.000539138	0.00616288	yes
XLOC_004699	XLOC_004699	Wfikkn2	11:94097301-94104025	FVA	AG1	OK	1.32477	0.455951	-1.5388	5.16875	2.35659e-07	5.60971e-06	yes
XLOC_004702	XLOC_004702	Cacna1g	11:94269691-94335517	FVA	AG1	OK	58.2462	23.7646	-1.29335	3.33708	0.000846627	0.00914973	yes
XLOC_004703	XLOC_004703	Epn3	11:94350855-94361776	FVA	AG1	OK	7.47714	1.03583	-2.8517	6.43904	1.20229e-10	4.48111e-09	yes
XLOC_004704	XLOC_004704	Mycbpap	11:94362669-94383064	FVA	AG1	OK	3.10847	1.06644	-1.54341	4.15099	3.31042e-05	0.00052213	yes
XLOC_004707	XLOC_004707	Xylt2	11:94523568-94538739	FVA	AG1	OK	12.0761	5.55698	-1.11978	5.98445	2.17123e-09	6.99548e-08	yes
XLOC_004709	XLOC_004709	Itga3	11:94905699-94938153	FVA	AG1	OK	9.97151	3.06296	-1.70289	9.11432	0	0	yes
XLOC_004711	XLOC_004711	Nxph3	11:95371168-95379462	FVA	AG1	OK	4.95344	9.50219	0.939829	-4.81902	1.44268e-06	2.9757e-05	yes
XLOC_004712	XLOC_004712	Ngfr	11:95439270-95448949	FVA	AG1	OK	1.6999	0.679172	-1.3236	4.36467	1.27317e-05	0.000218911	yes
XLOC_004717	XLOC_004717	Snx11	11:96625029-96639075	FVA	AG1	OK	4.02275	6.30686	0.648741	-3.37041	0.000750561	0.00821205	yes
XLOC_004720	XLOC_004720	Pnpo	11:96799045-96805314	FVA	AG1	OK	21.5295	13.3157	-0.693194	4.63788	3.52004e-06	6.78069e-05	yes
XLOC_004729	XLOC_004729	Srcin1	11:97370602-97436333	FVA	AG1	OK	36.8617	53.3762	0.534073	-3.78064	0.000156424	0.00209319	yes
XLOC_004731	XLOC_004731	E130012A19Rik	11:97488690-97490341	FVA	AG1	OK	0.6522	3.29562	2.33716	-3.1981	0.00138338	0.0139275	yes
XLOC_004734	XLOC_004734	Pip4k2b	11:97576427-97605979	FVA	AG1	OK	21.5123	31.0531	0.529574	-4.20721	2.58546e-05	0.000417157	yes
XLOC_004739	XLOC_004739	Plxdc1	11:97784468-97847661	FVA	AG1	OK	13.6213	3.17422	-2.10139	10.1283	0	0	yes
XLOC_004741	XLOC_004741	Cacnb1	11:97862594-97883937	FVA	AG1	OK	15.0933	34.1366	1.17741	-8.39679	0	0	yes
XLOC_004742	XLOC_004742	Stac2	11:97897935-97914775	FVA	AG1	OK	11.3193	25.2474	1.15735	-7.87512	3.33067e-15	1.94539e-13	yes
XLOC_004745	XLOC_004745	Neurod2	11:98186252-98191062	FVA	AG1	OK	3.12207	35.9845	3.5268	-17.5891	0	0	yes
XLOC_004746	XLOC_004746	Pgap3	11:98249997-98261814	FVA	AG1	OK	2.18178	3.88068	0.830803	-3.20161	0.00136661	0.0137992	yes
XLOC_004759	XLOC_004759	Krt9	11:100048106-100054538	FVA	AG1	OK	1.19714	5.97498	2.31934	-3.38029	0.00072409	0.00795624	yes
XLOC_004760	XLOC_004760	Hap1	11:100208642-100218194	FVA	AG1	OK	93.5996	52.9543	-0.821755	5.56302	2.6515e-08	7.30829e-07	yes
XLOC_004762	XLOC_004762	Jup	11:100231927-100259169	FVA	AG1	OK	16.6724	10.2669	-0.69946	4.26099	2.03523e-05	0.000335205	yes
XLOC_004763	XLOC_004763	Leprel4	11:100269355-100275975	FVA	AG1	OK	6.1982	3.69749	-0.745301	3.8533	0.000116538	0.00160677	yes
XLOC_004766	XLOC_004766	Acly	11:100337663-100389283	FVA	AG1	OK	53.1631	36.8153	-0.530119	3.47491	0.00051102	0.00588721	yes
XLOC_004773	XLOC_004773	Hcrt	11:100623006-100624325	FVA	AG1	OK	26.2058	0.0201581	-10.3443	3.66565	0.000246711	0.00315516	yes
XLOC_004775	XLOC_004775	Stat5b	11:100642044-100711816	FVA	AG1	OK	8.95269	3.88579	-1.20411	7.8111	5.77316e-15	3.28507e-13	yes
XLOC_004787	XLOC_004787	Vat1	11:101309747-101327553	FVA	AG1	OK	26.1081	6.12243	-2.09232	14.441	0	0	yes
XLOC_004788	XLOC_004788	Rnd2	11:101329590-101336637	FVA	AG1	OK	52.4114	25.9016	-1.01684	3.18109	0.00146723	0.0146476	yes
XLOC_004792	XLOC_004792	Dusp3	11:101832455-101846120	FVA	AG1	OK	24.1729	31.8821	0.39936	-3.11179	0.00185955	0.0178215	yes
XLOC_004794	XLOC_004794	E130111B04Rik	11:101891334-101891923	FVA	AG1	OK	0	0.621516	1.79769e+308	1.79769e+308	0.00463871	0.037315	yes
XLOC_004800	XLOC_004800	Ubtf	11:102165879-102182806	FVA	AG1	OK	19.4039	30.7475	0.664122	-4.48781	7.19584e-06	0.000130444	yes
XLOC_004802	XLOC_004802	Fam171a2	11:102298288-102308941	FVA	AG1	OK	10.4214	19.9787	0.938922	-5.24974	1.52313e-07	3.72914e-06	yes
XLOC_004806	XLOC_004806	Ccdc43	11:102545873-102559079	FVA	AG1	OK	7.98663	13.2703	0.732545	-3.23132	0.0012322	0.0126824	yes
XLOC_004808	XLOC_004808	Gjc1	11:102659666-102680844	FVA	AG1	OK	4.91309	1.19104	-2.04441	6.84934	7.41895e-12	3.18376e-10	yes
XLOC_004809	XLOC_004809	Eftud2	11:102697100-102742283	FVA	AG1	OK	18.3261	26.5457	0.534581	-3.8197	0.000133613	0.00181786	yes
XLOC_004810	XLOC_004810	Gfap	11:102748551-102758843	FVA	AG1	OK	61.8135	99.5725	0.687827	-5.45847	4.80245e-08	1.27683e-06	yes
XLOC_004812	XLOC_004812	Dcakd	11:102844557-102889668	FVA	AG1	OK	12.7206	26.5103	1.05939	-5.28315	1.26982e-07	3.13127e-06	yes
XLOC_004820	XLOC_004820	Rprml	11:103502995-103512094	FVA	AG1	OK	4.20472	38.5691	3.19736	-9.74667	0	0	yes
XLOC_004822	XLOC_004822	Wnt9b	11:103588681-103595374	FVA	AG1	OK	2.5309	0.13233	-4.25744	10.9091	0	0	yes
XLOC_004823	XLOC_004823	Nsf	11:103683013-103815374	FVA	AG1	OK	237.946	307.897	0.371816	-2.77815	0.00546701	0.0427644	yes
XLOC_004830	XLOC_004830	Limd2	11:105946147-106022397	FVA	AG1	OK	1.60063	3.95571	1.3053	-5.08214	3.73215e-07	8.5167e-06	yes
XLOC_004839	XLOC_004839	Ddx5	11:106641469-106680347	FVA	AG1	OK	84.664	114.056	0.429918	-2.97311	0.00294798	0.0258405	yes
XLOC_004845	XLOC_004845	Pitpnc1	11:107069202-107157587	FVA	AG1	OK	18.6389	8.75133	-1.09074	5.97104	2.35744e-09	7.55603e-08	yes
XLOC_004846	XLOC_004846	Cacng4	11:107585820-107655805	FVA	AG1	OK	20.0465	6.9739	-1.52331	8.86251	0	0	yes
XLOC_004847	XLOC_004847	Cacng5	11:107735835-107781291	FVA	AG1	OK	13.1692	2.82727	-2.21969	10.9036	0	0	yes
XLOC_004848	XLOC_004848	Prkca	11:107794608-108205278	FVA	AG1	OK	9.55827	36.666	1.93962	-14.3879	0	0	yes
XLOC_004850	XLOC_004850	Gm11696	11:109215562-109218932	FVA	AG1	OK	1.33552	0.73041	-0.87062	2.73798	0.00618184	0.0473003	yes
XLOC_004859	XLOC_004859	2610035D17Rik	11:112899185-113063193	FVA	AG1	OK	1.92376	2.94353	0.613622	-2.77858	0.00545967	0.0427287	yes
XLOC_004866	XLOC_004866	Btbd17	11:114652352-114659236	FVA	AG1	OK	4.22363	2.76266	-0.612424	2.77371	0.00554217	0.0432538	yes
XLOC_004871	XLOC_004871	Fads6	11:115139541-115159024	FVA	AG1	OK	12.9278	4.71163	-1.45617	8.15454	4.44089e-16	2.74429e-14	yes
XLOC_004876	XLOC_004876	Hn1	11:115358661-115375737	FVA	AG1	OK	7.68296	13.0559	0.764965	-4.90596	9.29701e-07	1.9852e-05	yes
XLOC_004879	XLOC_004879	Grb2	11:115505361-115569759	FVA	AG1	OK	34.0452	47.1984	0.471286	-3.06832	0.00215269	0.0200827	yes
XLOC_004890	XLOC_004890	Evpl	11:116081826-116099382	FVA	AG1	OK	4.35162	1.79688	-1.27606	2.8173	0.00484287	0.0386854	yes
XLOC_004893	XLOC_004893	Foxj1,Rnf157	11:116192016-116274135	FVA	AG1	OK	28.4854	38.6721	0.441073	-3.35777	0.000785728	0.00856045	yes
XLOC_004904	XLOC_004904	-	11:117338573-117344122	FVA	AG1	OK	0.0722525	0.802988	3.47426	-5.3749	7.66246e-08	1.96967e-06	yes
XLOC_004913	XLOC_004913	Timp2	11:118162372-118216824	FVA	AG1	OK	130.892	80.0547	-0.709323	5.73394	9.81225e-09	2.86558e-07	yes
XLOC_004914	XLOC_004914	Lgals3bp	11:118253831-118263366	FVA	AG1	OK	8.70559	5.12626	-0.764036	3.15614	0.00159873	0.0156804	yes
XLOC_004916	XLOC_004916	Rbfox3	11:118350977-118771393	FVA	AG1	OK	25.7957	63.3999	1.29735	-8.66069	0	0	yes
XLOC_004925	XLOC_004925	Nptx1	11:119399845-119409071	FVA	AG1	OK	21.1703	141.949	2.74526	-19.9186	0	0	yes
XLOC_004926	XLOC_004926	Gm11767	11:119793947-119803998	FVA	AG1	OK	0.923669	2.67185	1.53239	-5.11968	3.0606e-07	7.13171e-06	yes
XLOC_004931	XLOC_004931	2810410L24Rik	11:120047796-120051259	FVA	AG1	OK	3.69923	2.16647	-0.771879	2.97164	0.00296213	0.0259178	yes
XLOC_004945	XLOC_004945	Pycr1	11:120500673-120505124	FVA	AG1	OK	2.55469	0.802528	-1.67053	5.05043	4.40807e-07	9.94165e-06	yes
XLOC_004950	XLOC_004950	Rfng	11:120641868-120645488	FVA	AG1	OK	24.2172	32.1996	0.411013	-2.97334	0.00294578	0.0258356	yes
XLOC_004958	XLOC_004958	Rab40b	11:121217432-121249617	FVA	AG1	OK	5.83045	21.3214	1.87062	-9.74959	0	0	yes
XLOC_004977	XLOC_004977	Gm16518	11:3594521-3596822	FVA	AG1	OK	0.161223	0.919844	2.51233	-4.76385	1.89932e-06	3.83564e-05	yes
XLOC_004997	XLOC_004997	-	11:4651581-4654452	FVA	AG1	OK	0.176237	0.855671	2.27954	-5.04929	4.43452e-07	9.98671e-06	yes
XLOC_005059	XLOC_005059	Gm11973	11:6376137-6383844	FVA	AG1	OK	0.58685	1.81553	1.62933	-7.26586	3.70592e-13	1.78915e-11	yes
XLOC_005125	XLOC_005125	-	11:23933313-23934603	FVA	AG1	OK	0.143836	1.06454	2.88773	-3.86957	0.000109027	0.00151539	yes
XLOC_005126	XLOC_005126	-	11:23934768-23940907	FVA	AG1	OK	0.106334	0.608435	2.51651	-6.13552	8.48808e-10	2.87887e-08	yes
XLOC_005186	XLOC_005186	Ccnjl	11:43342340-43401108	FVA	AG1	OK	0.284415	1.11339	1.96889	-4.61634	3.90566e-06	7.45842e-05	yes
XLOC_005217	XLOC_005217	-	11:50362137-50364261	FVA	AG1	OK	0.0951181	0.386588	2.023	-2.8025	0.00507085	0.0402051	yes
XLOC_005222	XLOC_005222	-	11:51721478-51723095	FVA	AG1	OK	0.0506055	1.00056	4.30537	-4.04956	5.13139e-05	0.000777967	yes
XLOC_005237	XLOC_005237	Rps2-ps4	11:53460029-53462534	FVA	AG1	OK	0.325001	0.74921	1.20493	-3.03051	0.00244137	0.0221863	yes
XLOC_005244	XLOC_005244	Slc22a5	11:53678037-53842063	FVA	AG1	OK	1.15767	0.265659	-2.12358	3.15307	0.00161563	0.0158174	yes
XLOC_005268	XLOC_005268	-	11:57147310-57149980	FVA	AG1	OK	0.0453117	0.916511	4.3382	-5.09401	3.50577e-07	8.04764e-06	yes
XLOC_005269	XLOC_005269	-	11:57150480-57153173	FVA	AG1	OK	0.0594092	0.85426	3.84592	-5.14429	2.68531e-07	6.324e-06	yes
XLOC_005288	XLOC_005288	-	11:59203748-59205240	FVA	AG1	OK	0.529784	1.68063	1.66552	-3.91821	8.92073e-05	0.00126313	yes
XLOC_005396	XLOC_005396	Cyb5d1	11:69202474-69203850	FVA	AG1	OK	0.734772	0.221471	-1.73018	2.77224	0.00556725	0.0433971	yes
XLOC_005413	XLOC_005413	-	11:70190265-70196071	FVA	AG1	OK	0.400176	0.750018	0.906288	-3.23523	0.00121544	0.0125349	yes
XLOC_005480	XLOC_005480	Cpd	11:76588241-76590044	FVA	AG1	OK	0.49976	1.82489	1.8685	-4.93929	7.84095e-07	1.69183e-05	yes
XLOC_005484	XLOC_005484	Efcab5	11:76908993-76911306	FVA	AG1	OK	0.189014	0.563338	1.57551	-3.09891	0.00194232	0.0184288	yes
XLOC_005493	XLOC_005493	Myo18a	11:77681336-77685380	FVA	AG1	OK	0.232187	0.70142	1.59499	-4.39279	1.11906e-05	0.000194313	yes
XLOC_005494	XLOC_005494	-	11:77685594-77687253	FVA	AG1	OK	0.22526	0.777213	1.78672	-3.26113	0.00110971	0.0115719	yes
XLOC_005513	XLOC_005513	BC030499	11:78110765-78112039	FVA	AG1	OK	0.650216	0.159891	-2.02383	2.72683	0.00639451	0.0485568	yes
XLOC_005522	XLOC_005522	-	11:78808819-78809761	FVA	AG1	OK	0.163727	0.842611	2.36357	-2.71834	0.00656099	0.0495772	yes
XLOC_005545	XLOC_005545	-	11:80237361-80237884	FVA	AG1	OK	12.6584	7.4902	-0.757017	2.7703	0.00560054	0.0436102	yes
XLOC_005550	XLOC_005550	Accn1	11:80967358-80970823	FVA	AG1	OK	0.625556	1.3347	1.09331	-3.84166	0.000122205	0.00167669	yes
XLOC_005560	XLOC_005560	-	11:82200948-82202229	FVA	AG1	OK	1.81619	0.822275	-1.14322	3.02738	0.00246686	0.0223653	yes
XLOC_005590	XLOC_005590	1500016L03Rik	11:84342856-84343489	FVA	AG1	OK	0.885581	0	-1.79769e+308	-1.79769e+308	0.000872841	0.0093936	yes
XLOC_005591	XLOC_005591	1500016L03Rik	11:84343676-84344745	FVA	AG1	OK	0.898099	0.0652592	-3.78262	3.17312	0.00150812	0.0149737	yes
XLOC_005606	XLOC_005606	-	11:86171257-86171882	FVA	AG1	OK	2.23619	0.192082	-3.54125	3.52979	0.000415897	0.0049254	yes
XLOC_005644	XLOC_005644	-	11:94939698-94941472	FVA	AG1	OK	0.931768	0.33547	-1.47379	3.20313	0.00135942	0.0137433	yes
XLOC_005678	XLOC_005678	Gm11613	11:97511318-97514693	FVA	AG1	OK	0.45068	0.899776	0.997461	-3.07636	0.00209542	0.0196374	yes
XLOC_005713	XLOC_005713	-	11:98717548-98718732	FVA	AG1	OK	0.132453	0.812549	2.61698	-3.15962	0.00157978	0.0155205	yes
XLOC_005749	XLOC_005749	Gpatch8	11:102337231-102417679	FVA	AG1	OK	2.24307	0.132279	-4.08382	3.05279	0.00226722	0.0209175	yes
XLOC_005765	XLOC_005765	Gjc1	11:102658506-102659560	FVA	AG1	OK	1.34698	0.0991427	-3.76408	3.84677	0.000119686	0.00164651	yes
XLOC_005834	XLOC_005834	-	11:108763791-108765383	FVA	AG1	OK	0.542407	0.0983603	-2.46323	3.04387	0.00233556	0.0214206	yes
XLOC_005836	XLOC_005836	-	11:108766568-108771429	FVA	AG1	OK	0.619135	0.124882	-2.30969	5.52461	3.3021e-08	9.01311e-07	yes
XLOC_005837	XLOC_005837	-	11:108771654-108775747	FVA	AG1	OK	0.814785	0.41541	-0.971884	3.19855	0.0013812	0.0139102	yes
XLOC_005862	XLOC_005862	Rab37	11:114952617-115023547	FVA	AG1	OK	1.69472	0.0707653	-4.58186	3.28677	0.00101342	0.0106553	yes
XLOC_005865	XLOC_005865	Cdr2l	11:115259257-115262102	FVA	AG1	OK	0.351233	0.850697	1.27622	-3.47903	0.000503228	0.00581682	yes
XLOC_005871	XLOC_005871	Sumo2	11:115385617-115389345	FVA	AG1	OK	0.654235	1.47628	1.17408	-4.30047	1.70434e-05	0.000285162	yes
XLOC_005887	XLOC_005887	-	11:116099505-116100482	FVA	AG1	OK	1.9206	0.685546	-1.48623	3.24446	0.00117675	0.0121929	yes
XLOC_005946	XLOC_005946	Gm11762	11:119414288-119416115	FVA	AG1	OK	0.239545	0.65269	1.4461	-2.7493	0.00597218	0.0459209	yes
XLOC_005949	XLOC_005949	-	11:119787308-119788784	FVA	AG1	OK	0.180099	0.78028	2.1152	-3.3014	0.00096204	0.0102008	yes
XLOC_005950	XLOC_005950	-	11:119789153-119793586	FVA	AG1	OK	0.122985	0.74937	2.60719	-5.88812	3.90617e-09	1.21178e-07	yes
XLOC_005982	XLOC_005982	-	11:121183528-121185361	FVA	AG1	OK	1.14878	2.56304	1.15775	-3.98274	6.81239e-05	0.000993811	yes
XLOC_005995	XLOC_005995	Dtnb	12:3572536-3790623	FVA	AG1	OK	8.8815	14.496	0.706778	-3.64413	0.0002683	0.00338088	yes
XLOC_005997	XLOC_005997	Pomc	12:3954952-3960634	FVA	AG1	OK	4.54968	1.03526	-2.13578	4.01493	5.94631e-05	0.000884162	yes
XLOC_006000	XLOC_006000	Itsn2	12:4599985-4745472	FVA	AG1	OK	7.96223	11.4815	0.528061	-3.23339	0.00122331	0.0125951	yes
XLOC_006010	XLOC_006010	Slc7a15	12:8518003-8579222	FVA	AG1	OK	2.85407	0.196608	-3.85963	3.15419	0.00160943	0.0157717	yes
XLOC_006017	XLOC_006017	Osr1	12:9574675-9588233	FVA	AG1	OK	0.0999695	1.49813	3.90553	-4.66953	3.01884e-06	5.89237e-05	yes
XLOC_006020	XLOC_006020	Fam49a	12:12268938-12387886	FVA	AG1	OK	11.7718	21.6135	0.8766	-5.82964	5.55463e-09	1.69091e-07	yes
XLOC_006021	XLOC_006021	Nbas	12:13275921-13590611	FVA	AG1	OK	9.85821	5.85618	-0.751366	5.29965	1.16022e-07	2.88404e-06	yes
XLOC_006022	XLOC_006022	Fam84a	12:14143757-14158861	FVA	AG1	OK	5.51516	9.77898	0.82628	-5.76529	8.15152e-09	2.41251e-07	yes
XLOC_006027	XLOC_006027	Rock2	12:16902033-16997379	FVA	AG1	OK	13.6388	20.3282	0.57577	-4.65562	3.23003e-06	6.28474e-05	yes
XLOC_006031	XLOC_006031	Hpcal1	12:17697559-17958603	FVA	AG1	OK	27.0753	18.9462	-0.515071	2.86803	0.00413037	0.0339145	yes
XLOC_006042	XLOC_006042	Grhl1	12:25257297-25302432	FVA	AG1	OK	2.46361	9.01907	1.87221	-8.85736	0	0	yes
XLOC_006049	XLOC_006049	Adi1	12:29359955-29367054	FVA	AG1	OK	16.362	11.4344	-0.51696	2.76111	0.00576061	0.0446317	yes
XLOC_006052	XLOC_006052	Pxdn	12:30622898-30702524	FVA	AG1	OK	7.45838	21.4285	1.5226	-9.22837	0	0	yes
XLOC_006065	XLOC_006065	Twist1	12:34643135-34644668	FVA	AG1	OK	0.202768	1.23531	2.60697	-3.51259	0.000443761	0.00521542	yes
XLOC_006069	XLOC_006069	Sostdc1	12:37040651-37045032	FVA	AG1	OK	1.31604	2.59769	0.981031	-3.44964	0.000561328	0.00639354	yes
XLOC_006072	XLOC_006072	Dgkb	12:38606748-39361026	FVA	AG1	OK	9.73618	26.5887	1.44938	-9.02723	0	0	yes
XLOC_006076	XLOC_006076	Dock4	12:41172623-41574021	FVA	AG1	OK	11.2101	39.3025	1.80983	-8.91593	0	0	yes
XLOC_006079	XLOC_006079	Nrcam	12:45429886-45706234	FVA	AG1	OK	30.1416	41.0594	0.445956	-2.87823	0.00399918	0.0330843	yes
XLOC_006080	XLOC_006080	3110039M20Rik,Foxg1	12:50469527-50576946	FVA	AG1	OK	2.44512	22.4536	3.19897	-7.22678	4.94493e-13	2.37249e-11	yes
XLOC_006081	XLOC_006081	3110039M20Rik,Gm9804	12:50469527-50576946	FVA	AG1	OK	0.19805	1.38813	2.80921	-3.38202	0.000719545	0.00791756	yes
XLOC_006084	XLOC_006084	Coch	12:52694347-52706789	FVA	AG1	OK	6.26717	2.44249	-1.35946	5.0744	3.8872e-07	8.85089e-06	yes
XLOC_006088	XLOC_006088	Akap6	12:53800204-54256668	FVA	AG1	OK	17.0477	12.4323	-0.455485	2.95726	0.00310389	0.0269091	yes
XLOC_006095	XLOC_006095	Sstr1	12:59312675-59317021	FVA	AG1	OK	3.73874	7.77654	1.05658	-5.65628	1.54689e-08	4.40515e-07	yes
XLOC_006097	XLOC_006097	Pnn	12:60167843-60174990	FVA	AG1	OK	25.932	33.386	0.364506	-2.84015	0.00450923	0.0364728	yes
XLOC_006116	XLOC_006116	Abhd12b	12:71255075-71285422	FVA	AG1	OK	11.9761	0.0208748	-9.16418	7.52283	5.35127e-14	2.78356e-12	yes
XLOC_006121	XLOC_006121	Arid4a	12:72116938-72200313	FVA	AG1	OK	5.51308	7.99018	0.535368	-2.92435	0.00345181	0.0293975	yes
XLOC_006132	XLOC_006132	Prkch	12:74685689-74879169	FVA	AG1	OK	11.0111	0.904506	-3.60569	15.9222	0	0	yes
XLOC_006140	XLOC_006140	Akap5	12:77425849-77438348	FVA	AG1	OK	2.25026	8.65703	1.94378	-12.3064	0	0	yes
XLOC_006142	XLOC_006142	Hspa2	12:77504821-77507925	FVA	AG1	OK	10.1344	23.3787	1.20593	-6.03831	1.55736e-09	5.12999e-08	yes
XLOC_006147	XLOC_006147	Fut8	12:78339823-78577146	FVA	AG1	OK	13.9492	20.2403	0.537047	-3.57748	0.000346925	0.00421522	yes
XLOC_006151	XLOC_006151	Plekhh1	12:80130255-80190701	FVA	AG1	OK	11.3417	6.27878	-0.853078	6.05703	1.38659e-09	4.59194e-08	yes
XLOC_006155	XLOC_006155	Exd2	12:81564050-81601223	FVA	AG1	OK	10.7324	22.9017	1.09348	-5.68213	1.3303e-08	3.8099e-07	yes
XLOC_006158	XLOC_006158	3830431G21Rik	12:81793667-81825195	FVA	AG1	OK	8.41055	0.864093	-3.28294	13.3462	0	0	yes
XLOC_006160	XLOC_006160	4933426M11Rik	12:81891567-81981821	FVA	AG1	OK	8.08026	19.9465	1.30366	-9.36614	0	0	yes
XLOC_006169	XLOC_006169	Rgs6	12:84086281-84830053	FVA	AG1	OK	4.48656	1.16636	-1.94359	4.00514	6.19809e-05	0.000918066	yes
XLOC_006172	XLOC_006172	Psen1	12:85029057-85079395	FVA	AG1	OK	9.57787	12.9164	0.431423	-3.19518	0.00139745	0.0140509	yes
XLOC_006174	XLOC_006174	2410016O06Rik	12:85292074-85293981	FVA	AG1	OK	3.13038	4.88552	0.642176	-2.87569	0.00403142	0.0332611	yes
XLOC_006177	XLOC_006177	Dnalc1	12:85455212-85484543	FVA	AG1	OK	14.8209	24.1074	0.701846	-5.49497	3.90771e-08	1.05358e-06	yes
XLOC_006189	XLOC_006189	Fam164c	12:86638664-86639807	FVA	AG1	OK	1.79149	0.5877	-1.60801	5.0619	4.15096e-07	9.4026e-06	yes
XLOC_006198	XLOC_006198	Esrrb	12:87860275-87862568	FVA	AG1	OK	1.56557	0.412796	-1.92319	3.58716	0.000334303	0.00408112	yes
XLOC_006199	XLOC_006199	Vash1	12:88019695-88036638	FVA	AG1	OK	7.15312	13.0563	0.8681	-4.71629	2.40189e-06	4.75423e-05	yes
XLOC_006216	XLOC_006216	Kcnk13	12:101202645-101300893	FVA	AG1	OK	3.57291	2.03005	-0.815583	3.9924	6.54083e-05	0.000961458	yes
XLOC_006220	XLOC_006220	9030617O03Rik	12:102017329-102146378	FVA	AG1	OK	2.04235	1.26478	-0.691339	2.88381	0.00392895	0.0326599	yes
XLOC_006225	XLOC_006225	Slc24a4	12:103366361-103507720	FVA	AG1	OK	3.48247	12.536	1.8479	-8.38061	0	0	yes
XLOC_006228	XLOC_006228	Chga	12:103793126-103803238	FVA	AG1	OK	95.8598	54.4109	-0.817031	6.53861	6.20948e-11	2.40728e-09	yes
XLOC_006230	XLOC_006230	Unc79	12:104184814-104422635	FVA	AG1	OK	8.6948	13.3052	0.613768	-3.1033	0.00191375	0.0181997	yes
XLOC_006233	XLOC_006233	Otub2	12:104615210-104644950	FVA	AG1	OK	5.67955	15.536	1.45176	-7.86922	3.55271e-15	2.05951e-13	yes
XLOC_006237	XLOC_006237	Serpina3n	12:105503888-105652540	FVA	AG1	OK	14.0779	27.2288	0.951707	-4.71648	2.39956e-06	4.75266e-05	yes
XLOC_006239	XLOC_006239	2810011L19Rik	12:106574808-106622216	FVA	AG1	OK	13.6759	5.5806	-1.29315	7.55141	4.30767e-14	2.2559e-12	yes
XLOC_006241	XLOC_006241	Bdkrb2	12:106830936-106833410	FVA	AG1	OK	1.07152	0.139113	-2.94533	3.04242	0.00234683	0.0215043	yes
XLOC_006243	XLOC_006243	Ak7	12:106944269-107020621	FVA	AG1	OK	3.61627	1.54242	-1.22931	4.43779	9.08852e-06	0.000161204	yes
XLOC_006249	XLOC_006249	Hhipl1	12:109566239-109569341	FVA	AG1	OK	4.22681	1.77967	-1.24796	3.12191	0.00179685	0.0173122	yes
XLOC_006252	XLOC_006252	Evl	12:109793271-109927246	FVA	AG1	OK	44.9371	30.4717	-0.560437	3.15987	0.00157839	0.0155118	yes
XLOC_006256	XLOC_006256	Dlk1	12:110691691-110701548	FVA	AG1	OK	16.7138	2.47662	-2.7546	13.7903	0	0	yes
XLOC_006260	XLOC_006260	Mir434	12:110832380-110833357	FVA	AG1	OK	1.13648	0.218028	-2.38199	3.23732	0.0012066	0.0124645	yes
XLOC_006264	XLOC_006264	Dio3	12:111517039-111519293	FVA	AG1	OK	0.10063	2.68675	4.73873	-7.55967	4.04121e-14	2.12356e-12	yes
XLOC_006266	XLOC_006266	Dync1h1	12:111831564-111910012	FVA	AG1	OK	38.0623	27.217	-0.483852	3.66202	0.000250237	0.00319497	yes
XLOC_006271	XLOC_006271	Rcor1	12:112277974-112354103	FVA	AG1	OK	4.46969	6.63204	0.569278	-2.93037	0.00338558	0.0289051	yes
XLOC_006272	XLOC_006272	Traf3	12:112404704-112505365	FVA	AG1	OK	7.651	15.9643	1.06113	-4.88738	1.02188e-06	2.1641e-05	yes
XLOC_006275	XLOC_006275	A230065H16Rik	12:112644800-112650290	FVA	AG1	OK	7.86199	0.756949	-3.37662	6.562	5.3092e-11	2.06865e-09	yes
XLOC_006279	XLOC_006279	Mark3	12:112813104-112894483	FVA	AG1	OK	22.2697	29.542	0.407689	-3.0104	0.00260902	0.0234201	yes
XLOC_006287	XLOC_006287	Inf2	12:113826954-113853908	FVA	AG1	OK	31.4126	64.532	1.03867	-5.64645	1.63791e-08	4.65147e-07	yes
XLOC_006288	XLOC_006288	Adssl1	12:113858233-113879972	FVA	AG1	OK	12.4964	4.50516	-1.47186	5.8695	4.37104e-09	1.35056e-07	yes
XLOC_006295	XLOC_006295	Pacs2	12:114252781-114312614	FVA	AG1	OK	47.3106	31.5486	-0.584587	3.10985	0.00187182	0.0178926	yes
XLOC_006302	XLOC_006302	Vipr2	12:117316222-117384720	FVA	AG1	OK	5.22027	0.178105	-4.87332	7.52238	5.37348e-14	2.79042e-12	yes
XLOC_006306	XLOC_006306	Rapgef5	12:118772633-118998294	FVA	AG1	OK	12.4821	35.8134	1.52064	-11.5022	0	0	yes
XLOC_006309	XLOC_006309	Tmem196	12:121184193-121257526	FVA	AG1	OK	6.90048	2.92543	-1.23805	3.40232	0.000668174	0.00745316	yes
XLOC_006315	XLOC_006315	Gm3625	12:4598716-4599784	FVA	AG1	OK	1.79619	0.807414	-1.15356	2.76413	0.00570748	0.0442867	yes
XLOC_006318	XLOC_006318	Fkbp1b	12:4839889-4848474	FVA	AG1	OK	13.4413	27.5383	1.03477	-4.25736	2.06856e-05	0.00033997	yes
XLOC_006323	XLOC_006323	-	12:10138354-10166728	FVA	AG1	OK	8.15165	5.8962	-0.467307	3.39708	0.000681093	0.00756721	yes
XLOC_006324	XLOC_006324	Kcns3	12:11097543-11160063	FVA	AG1	OK	2.10561	6.20546	1.5593	-4.25249	2.11409e-05	0.000346532	yes
XLOC_006331	XLOC_006331	Greb1	12:16730163-16740211	FVA	AG1	OK	1.26695	0.119712	-3.40372	3.87225	0.000107835	0.00150356	yes
XLOC_006342	XLOC_006342	Gm16372	12:25178121-25178517	FVA	AG1	OK	3.11141	14.5312	2.22351	-5.44972	5.04502e-08	1.33345e-06	yes
XLOC_006358	XLOC_006358	Cbll1	12:32169701-32184566	FVA	AG1	OK	4.11028	6.25627	0.606068	-2.82631	0.00470882	0.0377512	yes
XLOC_006359	XLOC_006359	Slc26a4	12:32203116-32242016	FVA	AG1	OK	0.0748291	1.59024	4.4095	-5.94927	2.69349e-09	8.50954e-08	yes
XLOC_006367	XLOC_006367	F730043M19Rik	12:33795189-33832461	FVA	AG1	OK	8.94128	15.3698	0.781546	-3.80583	0.000141332	0.00190943	yes
XLOC_006368	XLOC_006368	Hdac9	12:34933169-35591474	FVA	AG1	OK	3.49261	1.29931	-1.42656	7.52385	5.32907e-14	2.77669e-12	yes
XLOC_006369	XLOC_006369	Ahr	12:36182653-36219336	FVA	AG1	OK	0.840076	2.04595	1.28418	-5.59361	2.22398e-08	6.19626e-07	yes
XLOC_006370	XLOC_006370	Tspan13	12:36740927-36769186	FVA	AG1	OK	53.322	97.5908	0.872014	-5.72564	1.03044e-08	2.99516e-07	yes
XLOC_006371	XLOC_006371	Bzw2	12:36818424-36883624	FVA	AG1	OK	11.4372	20.081	0.812104	-4.28337	1.84081e-05	0.000306286	yes
XLOC_006372	XLOC_006372	-	12:40669820-40675704	FVA	AG1	OK	26.3605	3.11805	-3.07966	11.4701	0	0	yes
XLOC_006375	XLOC_006375	Zfp277	12:41045032-41055393	FVA	AG1	OK	4.08208	7.30563	0.839702	-3.47805	0.000505078	0.0058318	yes
XLOC_006397	XLOC_006397	Aldoart2	12:56655750-56666813	FVA	AG1	OK	88.9298	120.275	0.435604	-2.87596	0.00402795	0.0332413	yes
XLOC_006403	XLOC_006403	-	12:57607199-57612674	FVA	AG1	OK	2.02314	0	-1.79769e+308	-1.79769e+308	0.00348709	0.0296407	yes
XLOC_006404	XLOC_006404	Nkx2-1	12:57634434-57634725	FVA	AG1	OK	2.42522	0.142916	-4.08487	4.27398	1.9201e-05	0.000317939	yes
XLOC_006405	XLOC_006405	RP23-136M3.5	12:57711276-57711741	FVA	AG1	OK	1.00546	0	-1.79769e+308	-1.79769e+308	0.00387557	0.0323205	yes
XLOC_006406	XLOC_006406	Nkx2-9	12:57712582-57714239	FVA	AG1	OK	1.12338	0.107763	-3.38192	3.50521	0.000456245	0.00534182	yes
XLOC_006409	XLOC_006409	Sec23a	12:60059319-60113017	FVA	AG1	OK	19.247	25.4488	0.402966	-3.08192	0.00205673	0.0193217	yes
XLOC_006424	XLOC_006424	Cdkl1	12:70847751-70892398	FVA	AG1	OK	10.8225	4.65779	-1.21632	5.6045	2.08857e-08	5.85065e-07	yes
XLOC_006425	XLOC_006425	Map4k5	12:70904686-70993872	FVA	AG1	OK	10.5095	16.2212	0.62618	-3.08409	0.00204177	0.0192145	yes
XLOC_006434	XLOC_006434	Rtn1	12:73312641-73510078	FVA	AG1	OK	376.477	579.214	0.621537	-4.15431	3.26275e-05	0.000515664	yes
XLOC_006442	XLOC_006442	Kcnh5	12:75993756-76277767	FVA	AG1	OK	2.7252	0.395928	-2.78305	9.33201	0	0	yes
XLOC_006449	XLOC_006449	Spnb1	12:77634772-77811147	FVA	AG1	OK	14.0701	24.5562	0.803448	-3.88482	0.000102407	0.001435	yes
XLOC_006451	XLOC_006451	Rab15	12:77898944-77923432	FVA	AG1	OK	30.6094	68.5478	1.16314	-9.14142	0	0	yes
XLOC_006453	XLOC_006453	-	12:78139525-78143290	FVA	AG1	OK	0.211537	1.0156	2.26335	-3.50567	0.000455463	0.00533468	yes
XLOC_006460	XLOC_006460	Rdh11	12:80275263-80292902	FVA	AG1	OK	9.92195	7.25393	-0.451862	2.8197	0.00480691	0.0384279	yes
XLOC_006463	XLOC_006463	Actn1	12:81267887-81361355	FVA	AG1	OK	9.00393	21.7457	1.2721	-7.31741	2.52909e-13	1.2483e-11	yes
XLOC_006467	XLOC_006467	Gm1568	12:81860133-81861952	FVA	AG1	OK	2.05977	3.89306	0.91842	-4.64137	3.46104e-06	6.68788e-05	yes
XLOC_006473	XLOC_006473	Map3k9	12:82815901-82881914	FVA	AG1	OK	11.073	7.02706	-0.656055	2.73638	0.00621188	0.0474498	yes
XLOC_006474	XLOC_006474	Dpf3	12:84086281-84830053	FVA	AG1	OK	1.25749	3.06116	1.28354	-2.74693	0.00601563	0.0462131	yes
XLOC_006479	XLOC_006479	C130039O16Rik	12:85487082-85559860	FVA	AG1	OK	2.43032	3.83478	0.657998	-4.23077	2.32891e-05	0.00037893	yes
XLOC_006485	XLOC_006485	Tmem90a	12:86018164-86039630	FVA	AG1	OK	10.9425	2.34809	-2.22039	7.92378	2.22045e-15	1.3093e-13	yes
XLOC_006486	XLOC_006486	Npc2	12:86095519-86116204	FVA	AG1	OK	18.7931	13.5495	-0.471965	2.99879	0.00271057	0.0241358	yes
XLOC_006487	XLOC_006487	1110018G07Rik	12:86258908-86314110	FVA	AG1	OK	17.0654	26.9468	0.659035	-4.52776	5.96124e-06	0.000109833	yes
XLOC_006498	XLOC_006498	Zdhhc22	12:88321662-88332672	FVA	AG1	OK	32.9467	3.50206	-3.23386	17.6469	0	0	yes
XLOC_006499	XLOC_006499	Ngb	12:88367249-88443538	FVA	AG1	OK	10.4854	0.983863	-3.41378	4.97483	6.53064e-07	1.43312e-05	yes
XLOC_006516	XLOC_006516	Eml5	12:99985567-100056186	FVA	AG1	OK	7.32118	2.2452	-1.70524	7.42519	1.12577e-13	5.69295e-12	yes
XLOC_006517	XLOC_006517	Foxn3	12:100428286-100688313	FVA	AG1	OK	7.28331	5.28098	-0.463789	3.3173	0.000908927	0.00971766	yes
XLOC_006521	XLOC_006521	Gpr68	12:102017329-102146378	FVA	AG1	OK	0.526196	1.91284	1.86204	-4.73345	2.20732e-06	4.39729e-05	yes
XLOC_006522	XLOC_006522	Ccdc88c	12:102149602-102267085	FVA	AG1	OK	3.15335	7.31796	1.21456	-5.54658	2.91309e-08	7.98657e-07	yes
XLOC_006525	XLOC_006525	Fbln5	12:102988147-103057333	FVA	AG1	OK	7.6834	1.70158	-2.17487	6.83722	8.07465e-12	3.44125e-10	yes
XLOC_006529	XLOC_006529	Lgmn	12:103632253-103678062	FVA	AG1	OK	51.3442	34.4757	-0.574621	4.41844	9.94155e-06	0.000175128	yes
XLOC_006533	XLOC_006533	Prima1	12:104432674-104480518	FVA	AG1	OK	5.07359	2.02645	-1.32405	3.87282	0.000107582	0.00150071	yes
XLOC_006535	XLOC_006535	Asb2	12:104559391-104594132	FVA	AG1	OK	2.03152	0.643966	-1.6575	5.63649	1.73549e-08	4.91054e-07	yes
XLOC_006539	XLOC_006539	Clmn	12:106001324-106103193	FVA	AG1	OK	27.052	14.0189	-0.948359	7.61581	2.62013e-14	1.40794e-12	yes
XLOC_006544	XLOC_006544	-	12:107138497-107144936	FVA	AG1	OK	0.361556	1.25156	1.79144	-2.9571	0.00310544	0.026915	yes
XLOC_006545	XLOC_006545	Bcl11b	12:109148604-109242334	FVA	AG1	OK	2.03626	17.0714	3.06759	-16.1129	0	0	yes
XLOC_006550	XLOC_006550	Slc25a29	12:110064006-110074097	FVA	AG1	OK	4.237	8.87054	1.06598	-5.29621	1.18232e-07	2.93188e-06	yes
XLOC_006563	XLOC_006563	Ckb	12:112907479-112910672	FVA	AG1	OK	427.424	296.897	-0.525705	3.95529	7.64435e-05	0.00109807	yes
XLOC_006568	XLOC_006568	BC048943	12:113217412-113219055	FVA	AG1	OK	1.22643	0.0666417	-4.2019	3.39628	0.000683078	0.00758654	yes
XLOC_006571	XLOC_006571	Ahnak2	12:114011400-114013923	FVA	AG1	OK	1.7105	0.399518	-2.09809	3.51047	0.000447319	0.00524924	yes
XLOC_006577	XLOC_006577	Ighm	12:114656774-114668649	FVA	AG1	OK	10.7832	5.07731	-1.08665	4.10571	4.03075e-05	0.000625839	yes
XLOC_006582	XLOC_006582	Itgb8	12:120396427-120477321	FVA	AG1	OK	7.05976	5.3466	-0.400997	2.90361	0.00368882	0.0310988	yes
XLOC_006600	XLOC_006600	Dnmt3a	12:3806548-3914437	FVA	AG1	OK	0.706612	0.076191	-3.21323	3.16757	0.00153716	0.015218	yes
XLOC_006650	XLOC_006650	-	12:11177017-11180076	FVA	AG1	OK	0.0673712	0.586164	3.1211	-4.67785	2.89898e-06	5.67994e-05	yes
XLOC_006651	XLOC_006651	-	12:11180920-11182458	FVA	AG1	OK	0.0614483	0.805338	3.71215	-3.69644	0.000218645	0.0028302	yes
XLOC_006653	XLOC_006653	-	12:11889119-11889507	FVA	AG1	OK	115.335	173.977	0.593065	-3.6936	0.000221099	0.00285599	yes
XLOC_006654	XLOC_006654	-	12:12786587-12787392	FVA	AG1	OK	0.543016	0	-1.79769e+308	-1.79769e+308	0.00149282	0.0148551	yes
XLOC_006660	XLOC_006660	-	12:13795757-13796063	FVA	AG1	OK	14.27	1.48674	-3.26275	4.43804	9.07798e-06	0.000161109	yes
XLOC_006661	XLOC_006661	-	12:13796581-13796669	FVA	AG1	OK	834.977	79.7762	-3.38771	3.39365	0.00068969	0.00763904	yes
XLOC_006667	XLOC_006667	-	12:14134758-14142765	FVA	AG1	OK	0.662937	1.44907	1.12819	-5.11373	3.15851e-07	7.33772e-06	yes
XLOC_006697	XLOC_006697	-	12:21564610-21569656	FVA	AG1	OK	0.983081	0.573971	-0.776332	2.98523	0.00283367	0.0250658	yes
XLOC_006713	XLOC_006713	-	12:25369728-25370608	FVA	AG1	OK	0.843464	0.123376	-2.77327	2.73059	0.0063221	0.0481252	yes
XLOC_006778	XLOC_006778	Tspan13	12:36737977-36740816	FVA	AG1	OK	0.985581	2.00972	1.02795	-3.85868	0.000114003	0.00157324	yes
XLOC_006780	XLOC_006780	Etv1	12:39594981-39598021	FVA	AG1	OK	4.77388	10.3354	1.11437	-6.4108	1.44754e-10	5.36283e-09	yes
XLOC_006795	XLOC_006795	-	12:45936818-45937724	FVA	AG1	OK	0.210623	1.07296	2.34886	-2.98597	0.00282681	0.0250123	yes
XLOC_006796	XLOC_006796	-	12:45937839-45939978	FVA	AG1	OK	0.171183	0.544775	1.67012	-3.03688	0.00239043	0.0218132	yes
XLOC_006811	XLOC_006811	-	12:50465304-50466284	FVA	AG1	OK	0.088606	0.769809	3.11902	-2.79672	0.00516244	0.0407848	yes
XLOC_006819	XLOC_006819	-	12:51115291-51116383	FVA	AG1	OK	0	0.771454	1.79769e+308	1.79769e+308	5.37297e-06	9.99482e-05	yes
XLOC_006843	XLOC_006843	-	12:56654875-56655549	FVA	AG1	OK	4.14561	0.994777	-2.05914	4.41519	1.00922e-05	0.000177277	yes
XLOC_006882	XLOC_006882	-	12:67562073-67565511	FVA	AG1	OK	0.971573	0.251206	-1.95145	5.28749	1.24004e-07	3.06518e-06	yes
XLOC_006903	XLOC_006903	Abhd12b	12:71285575-71286312	FVA	AG1	OK	2.00873	0.137559	-3.86816	3.70199	0.000213913	0.00277244	yes
XLOC_006905	XLOC_006905	-	12:71287842-71288394	FVA	AG1	OK	1.78956	0.20336	-3.1375	2.8976	0.00376033	0.0315639	yes
XLOC_006907	XLOC_006907	Pygl	12:71289585-71291209	FVA	AG1	OK	2.52691	0.372745	-2.76111	6.47541	9.45557e-11	3.57599e-09	yes
XLOC_006916	XLOC_006916	-	12:71467766-71468103	FVA	AG1	OK	4.84958	0.269611	-4.16891	2.83744	0.0045477	0.0367071	yes
XLOC_006964	XLOC_006964	-	12:75802332-75802395	FVA	AG1	OK	0	4032.97	1.79769e+308	1.79769e+308	1.63949e-05	0.00027546	yes
XLOC_006969	XLOC_006969	-	12:75931652-75932408	FVA	AG1	OK	1.22874	0.206078	-2.57592	2.93337	0.00335299	0.0286744	yes
XLOC_006970	XLOC_006970	-	12:75988503-75993694	FVA	AG1	OK	3.80995	1.70223	-1.16235	6.30536	2.8753e-10	1.02116e-08	yes
XLOC_006977	XLOC_006977	Zbtb25	12:77446176-77449473	FVA	AG1	OK	2.56604	1.62305	-0.660833	2.97638	0.0029167	0.0256201	yes
XLOC_007013	XLOC_007013	-	12:81706971-81712807	FVA	AG1	OK	0.911605	1.73795	0.930903	-4.19131	2.77346e-05	0.000444935	yes
XLOC_007018	XLOC_007018	3830431G21Rik	12:81793667-81825195	FVA	AG1	OK	0.96526	0.0381432	-4.66142	4.7362	2.1776e-06	4.34649e-05	yes
XLOC_007019	XLOC_007019	3830431G21Rik	12:81793667-81825195	FVA	AG1	OK	1.37919	0.0402979	-5.09698	3.46859	0.000523194	0.00600507	yes
XLOC_007021	XLOC_007021	3830431G21Rik	12:81793667-81825195	FVA	AG1	OK	1.44095	0.16304	-3.14372	4.23182	2.31807e-05	0.000377563	yes
XLOC_007054	XLOC_007054	Numb	12:85134429-85262861	FVA	AG1	OK	0.924394	0.166687	-2.47136	3.06255	0.00219459	0.0203874	yes
XLOC_007075	XLOC_007075	-	12:86417036-86423968	FVA	AG1	OK	1.11443	0.531112	-1.06922	4.53056	5.88262e-06	0.000108579	yes
XLOC_007105	XLOC_007105	Tmed8	12:88506926-88541156	FVA	AG1	OK	1.29044	0.156122	-3.04712	2.71789	0.00656995	0.0496328	yes
XLOC_007182	XLOC_007182	-	12:103507774-103511498	FVA	AG1	OK	2.74731	10.8174	1.97727	-10.5778	0	0	yes
XLOC_007187	XLOC_007187	Unc79	12:104423271-104429026	FVA	AG1	OK	0.28071	0.603039	1.10317	-3.56661	0.000361624	0.00436805	yes
XLOC_007216	XLOC_007216	-	12:107323566-107326869	FVA	AG1	OK	0.116295	0.56773	2.28742	-4.51311	6.38831e-06	0.000117213	yes
XLOC_007218	XLOC_007218	-	12:109323194-109325134	FVA	AG1	OK	0.0724026	0.648462	3.16291	-3.84008	0.000122993	0.00168675	yes
XLOC_007248	XLOC_007248	-	12:111461361-111464270	FVA	AG1	OK	0.0757078	0.753656	3.31539	-5.12329	3.00254e-07	7.0229e-06	yes
XLOC_007249	XLOC_007249	-	12:111465811-111466774	FVA	AG1	OK	0.0429964	0.87918	4.35387	-2.76964	0.00561186	0.0436874	yes
XLOC_007271	XLOC_007271	A230087F16Rik	12:112525655-112528759	FVA	AG1	OK	0.78802	0.395424	-0.994832	2.88076	0.00396714	0.0329056	yes
XLOC_007298	XLOC_007298	2810002N01Rik	12:112990475-112992323	FVA	AG1	OK	0.239453	0.635643	1.40847	-2.71954	0.0065372	0.0494338	yes
XLOC_007318	XLOC_007318	-	12:114868203-114869265	FVA	AG1	OK	3.77275	1.06079	-1.83048	5.16003	2.46906e-07	5.85038e-06	yes
XLOC_007348	XLOC_007348	Dip2c	13:9275807-9668267	FVA	AG1	OK	8.44517	11.5219	0.448186	-2.90318	0.00369393	0.0311334	yes
XLOC_007349	XLOC_007349	Chrm3	13:9874670-10359783	FVA	AG1	OK	3.52012	8.54435	1.27935	-4.8966	9.75111e-07	2.07643e-05	yes
XLOC_007352	XLOC_007352	Ero1lb	13:12658178-12701859	FVA	AG1	OK	17.0181	8.96197	-0.925183	3.66741	0.000245018	0.0031387	yes
XLOC_007355	XLOC_007355	Lyst	13:13682650-13871672	FVA	AG1	OK	5.62654	9.42488	0.744225	-4.59724	4.28119e-06	8.1054e-05	yes
XLOC_007356	XLOC_007356	Gng4	13:13876275-13920236	FVA	AG1	OK	10.9284	7.9145	-0.465516	2.89042	0.00384723	0.0321623	yes
XLOC_007362	XLOC_007362	Inhba	13:15860343-16123445	FVA	AG1	OK	0.589089	1.52565	1.37287	-3.43683	0.000588575	0.00666616	yes
XLOC_007367	XLOC_007367	Elmo1	13:20182311-20700214	FVA	AG1	OK	40.4121	9.61512	-2.07141	12.7168	0	0	yes
XLOC_007374	XLOC_007374	Gm11274	13:21845334-21878961	FVA	AG1	OK	17.1186	80.3152	2.23011	-5.77157	7.85384e-09	2.33559e-07	yes
XLOC_007384	XLOC_007384	Fam65b	13:24715730-24824322	FVA	AG1	OK	9.33214	13.8908	0.573853	-3.07238	0.00212357	0.019865	yes
XLOC_007391	XLOC_007391	Gm17419	13:29037067-29051325	FVA	AG1	OK	2.09128	3.90776	0.901956	-3.53173	0.00041285	0.00489308	yes
XLOC_007393	XLOC_007393	Mboat1	13:30228497-30338535	FVA	AG1	OK	3.9274	1.96099	-1.00199	3.10418	0.00190805	0.0181679	yes
XLOC_007401	XLOC_007401	Serpinb1b	13:33170401-33186223	FVA	AG1	OK	2.40855	0.478477	-2.33164	4.12573	3.69554e-05	0.000578445	yes
XLOC_007402	XLOC_007402	Serpinb6a	13:34045182-34052075	FVA	AG1	OK	3.31281	1.23632	-1.422	3.40048	0.000672688	0.00748999	yes
XLOC_007414	XLOC_007414	Dsp	13:38243122-38290445	FVA	AG1	OK	0.938359	5.68723	2.59951	-10.2339	0	0	yes
XLOC_007418	XLOC_007418	Gcnt2	13:40955086-41060800	FVA	AG1	OK	2.17111	4.91839	1.17975	-4.34695	1.38042e-05	0.000235128	yes
XLOC_007423	XLOC_007423	Hivep1	13:42147390-42280395	FVA	AG1	OK	11.5904	5.65515	-1.03529	6.31795	2.6505e-10	9.4786e-09	yes
XLOC_007425	XLOC_007425	Phactr1	13:42775873-43234716	FVA	AG1	OK	19.5802	50.9217	1.37888	-8.71834	0	0	yes
XLOC_007429	XLOC_007429	Rnf182	13:43711245-43766496	FVA	AG1	OK	4.88293	11.6704	1.25704	-6.79339	1.0953e-11	4.57333e-10	yes
XLOC_007430	XLOC_007430	-	13:43795896-43814576	FVA	AG1	OK	1.06681	2.67175	1.32448	-2.7705	0.00559698	0.0435935	yes
XLOC_007431	XLOC_007431	Cd83	13:43880494-43898497	FVA	AG1	OK	19.2469	4.90401	-1.97259	9.24975	0	0	yes
XLOC_007435	XLOC_007435	Mylip	13:45485172-45507392	FVA	AG1	OK	3.9513	8.18834	1.05124	-3.63956	0.0002731	0.00343158	yes
XLOC_007437	XLOC_007437	5033430I15Rik	13:46060614-46062210	FVA	AG1	OK	4.86521	1.2725	-1.93484	5.00682	5.53356e-07	1.22916e-05	yes
XLOC_007439	XLOC_007439	Cap2	13:46581631-46745723	FVA	AG1	OK	34.7473	62.3756	0.844082	-6.23482	4.52285e-10	1.56492e-08	yes
XLOC_007445	XLOC_007445	Id4	13:48356396-48361401	FVA	AG1	OK	24.6249	14.3008	-0.784024	5.98449	2.1707e-09	6.99548e-08	yes
XLOC_007452	XLOC_007452	Ippk	13:49516670-49563852	FVA	AG1	OK	1.98089	3.45186	0.801225	-4.73057	2.23886e-06	4.45724e-05	yes
XLOC_007457	XLOC_007457	Ogn	13:49703237-49719872	FVA	AG1	OK	0.448352	2.41416	2.42881	-7.49499	6.63913e-14	3.40757e-12	yes
XLOC_007469	XLOC_007469	Cplx2	13:54481516-54489876	FVA	AG1	OK	63.133	308.36	2.28815	-13.0679	0	0	yes
XLOC_007474	XLOC_007474	Cdhr2	13:54837985-54851001	FVA	AG1	OK	12.2375	40.5461	1.72825	-6.35849	2.03749e-10	7.42385e-09	yes
XLOC_007477	XLOC_007477	Unc5a	13:55050901-55107624	FVA	AG1	OK	10.6905	42.9086	2.00493	-11.2226	0	0	yes
XLOC_007480	XLOC_007480	Rgs14	13:55470839-55486518	FVA	AG1	OK	4.69934	30.2427	2.68606	-14.8831	0	0	yes
XLOC_007487	XLOC_007487	B230219D22Rik	13:55794520-55804920	FVA	AG1	OK	19.1946	26.7051	0.476414	-3.71441	0.00020368	0.00265093	yes
XLOC_007491	XLOC_007491	Fbxl21	13:56623823-56643155	FVA	AG1	OK	4.53535	1.68658	-1.42712	4.16699	3.08645e-05	0.00049031	yes
XLOC_007494	XLOC_007494	-	13:56851408-56855289	FVA	AG1	OK	3.68159	0.421101	-3.12809	11.6412	0	0	yes
XLOC_007509	XLOC_007509	Zfp369	13:65379857-65400723	FVA	AG1	OK	4.32028	8.19805	0.924156	-4.38091	1.18185e-05	0.000204348	yes
XLOC_007514	XLOC_007514	Zfp273,Zfp493	13:67880640-67945339	FVA	AG1	OK	6.62364	10.2297	0.627072	-2.85709	0.00427549	0.0349204	yes
XLOC_007515	XLOC_007515	BC048507	13:67964430-67964713	FVA	AG1	OK	94.4498	202.453	1.09997	-5.61145	2.00642e-08	5.63584e-07	yes
XLOC_007520	XLOC_007520	Med10	13:69948640-69955050	FVA	AG1	OK	6.78964	14.2288	1.06741	-4.46396	8.04585e-06	0.0001442	yes
XLOC_007525	XLOC_007525	Slc6a3	13:73674216-73716197	FVA	AG1	OK	7.8978	0.0231857	-8.41207	8.48096	0	0	yes
XLOC_007529	XLOC_007529	Brd9	13:74075208-74098401	FVA	AG1	OK	19.0916	43.9795	1.20389	-7.13723	9.52349e-13	4.45844e-11	yes
XLOC_007530	XLOC_007530	Tppp	13:74145284-74173624	FVA	AG1	OK	60.5492	82.3612	0.443858	-3.51129	0.000445931	0.00523495	yes
XLOC_007536	XLOC_007536	Pcsk1	13:75227090-75272584	FVA	AG1	OK	6.12014	4.22719	-0.533866	3.45444	0.000551446	0.0062966	yes
XLOC_007538	XLOC_007538	Glrx	13:75977335-75987663	FVA	AG1	OK	25.5395	17.4527	-0.549279	3.48476	0.000492572	0.00571517	yes
XLOC_007542	XLOC_007542	Mctp1	13:76519874-77172543	FVA	AG1	OK	3.32371	10.6732	1.68313	-9.91768	0	0	yes
XLOC_007547	XLOC_007547	-	13:78566393-78581972	FVA	AG1	OK	4.18028	0.648643	-2.6881	2.89103	0.00383986	0.0321093	yes
XLOC_007553	XLOC_007553	Mef2c	13:83764676-83806685	FVA	AG1	OK	17.7995	29.8392	0.745375	-3.05227	0.00227119	0.0209478	yes
XLOC_007554	XLOC_007554	C130071C03Rik	13:83860864-83882509	FVA	AG1	OK	3.64752	11.9692	1.71435	-9.35806	0	0	yes
XLOC_007556	XLOC_007556	Tmem161b	13:84361810-84435540	FVA	AG1	OK	4.85585	8.12679	0.74296	-3.28803	0.00100892	0.0106178	yes
XLOC_007558	XLOC_007558	Edil3	13:88960901-89462469	FVA	AG1	OK	44.7508	19.4679	-1.20081	9.69914	0	0	yes
XLOC_007559	XLOC_007559	Hapln1	13:89723172-89751424	FVA	AG1	OK	1.34687	5.44092	2.01424	-7.22992	4.83391e-13	2.32283e-11	yes
XLOC_007564	XLOC_007564	Ankrd34b	13:93195958-93211613	FVA	AG1	OK	7.08809	3.89422	-0.864062	3.79507	0.000147601	0.00198631	yes
XLOC_007570	XLOC_007570	Arsb	13:94541432-94713016	FVA	AG1	OK	19.4991	31.3839	0.686614	-5.3255	1.00675e-07	2.52899e-06	yes
XLOC_007571	XLOC_007571	Lhfpl2	13:94890767-94965400	FVA	AG1	OK	4.65354	8.33137	0.840225	-4.73498	2.19073e-06	4.36986e-05	yes
XLOC_007572	XLOC_007572	Ap3b1	13:95127437-95336667	FVA	AG1	OK	10.3188	14.596	0.500297	-3.03801	0.00238149	0.0217444	yes
XLOC_007574	XLOC_007574	Otp	13:95645604-95653156	FVA	AG1	OK	2.63414	0.0620839	-5.40697	3.36627	0.000761929	0.00831942	yes
XLOC_007583	XLOC_007583	Enc1	13:98010283-98023010	FVA	AG1	OK	47.1626	186.171	1.98092	-15.158	0	0	yes
XLOC_007584	XLOC_007584	Gm11019	13:98266575-98266926	FVA	AG1	OK	1.15334	0.0829431	-3.79755	5.08718	3.63427e-07	8.31175e-06	yes
XLOC_007587	XLOC_007587	Gm9828	13:99087016-99094533	FVA	AG1	OK	2.37182	5.22664	1.13989	-2.81528	0.00487354	0.03887	yes
XLOC_007598	XLOC_007598	Gm5454	13:104146255-104147786	FVA	AG1	OK	15.5887	25.3031	0.698816	-4.34648	1.38342e-05	0.000235509	yes
XLOC_007603	XLOC_007603	Htr1a	13:106233096-106238282	FVA	AG1	OK	1.84887	7.50789	2.02176	-10.8545	0	0	yes
XLOC_007606	XLOC_007606	2810008M24Rik	13:108834613-108839528	FVA	AG1	OK	13.3191	22.9691	0.786194	-5.10937	3.23227e-07	7.48655e-06	yes
XLOC_007610	XLOC_007610	Plk2	13:111184742-111191052	FVA	AG1	OK	15.1931	65.1626	2.10063	-15.0843	0	0	yes
XLOC_007614	XLOC_007614	Ankrd55	13:113078699-113174209	FVA	AG1	OK	4.34086	1.04777	-2.05065	8.74613	0	0	yes
XLOC_007619	XLOC_007619	Ccno	13:113778051-113780981	FVA	AG1	OK	0.252068	1.27373	2.33718	-4.533	5.8152e-06	0.000107494	yes
XLOC_007622	XLOC_007622	Arl15	13:114584723-114949564	FVA	AG1	OK	2.72599	8.90461	1.70777	-7.50794	6.01741e-14	3.10394e-12	yes
XLOC_007624	XLOC_007624	Emb	13:118008628-118067079	FVA	AG1	OK	6.36202	4.70924	-0.433993	2.80138	0.00508839	0.0403028	yes
XLOC_007625	XLOC_007625	Hcn1	13:118391455-118776329	FVA	AG1	OK	1.95433	6.57103	1.74944	-11.7673	0	0	yes
XLOC_007626	XLOC_007626	Fgf10	13:119485904-119580975	FVA	AG1	OK	1.06755	2.66077	1.31753	-5.97976	2.23462e-09	7.17727e-08	yes
XLOC_007629	XLOC_007629	Gm7120	13:120276076-120284312	FVA	AG1	OK	8.49683	12.8196	0.593352	-2.73033	0.00632712	0.0481516	yes
XLOC_007631	XLOC_007631	Net1	13:3885180-3887816	FVA	AG1	OK	2.62134	5.6877	1.11754	-5.70474	1.1652e-08	3.3647e-07	yes
XLOC_007632	XLOC_007632	Ucn3	13:3939945-3944160	FVA	AG1	OK	0.921101	0	-1.79769e+308	-1.79769e+308	8.75626e-06	0.000156027	yes
XLOC_007633	XLOC_007633	Akr1c18	13:4131864-4149878	FVA	AG1	OK	0.074584	1.31607	4.14122	-3.92261	8.75936e-05	0.00124207	yes
XLOC_007640	XLOC_007640	Ryr2	13:11642086-11977869	FVA	AG1	OK	3.48681	0.801109	-2.12184	3.38222	0.000719019	0.00791459	yes
XLOC_007641	XLOC_007641	Mtr	13:12274934-12350430	FVA	AG1	OK	2.58741	4.57329	0.821726	-4.24699	2.16666e-05	0.000354209	yes
XLOC_007642	XLOC_007642	Actn2	13:12360028-12433016	FVA	AG1	OK	1.27405	4.16047	1.70732	-8.07209	6.66134e-16	4.06763e-14	yes
XLOC_007643	XLOC_007643	Lgals8	13:12531540-12553818	FVA	AG1	OK	16.0402	9.77657	-0.714289	3.37353	0.000742108	0.00812821	yes
XLOC_007653	XLOC_007653	5033411D12Rik	13:16949327-17764425	FVA	AG1	OK	2.28454	1.16722	-0.968824	2.89475	0.0037946	0.0317911	yes
XLOC_007658	XLOC_007658	Pou6f2	13:18331319-18470486	FVA	AG1	OK	1.0859	0.161745	-2.74711	4.11577	3.85893e-05	0.00060067	yes
XLOC_007669	XLOC_007669	Hist1h4k	13:21831879-21842448	FVA	AG1	OK	0.8107	1.96268	1.27559	-6.58923	4.42104e-11	1.74906e-09	yes
XLOC_007676	XLOC_007676	Hist1h2be	13:23634857-23784836	FVA	AG1	OK	1.71554	5.22972	1.60807	-4.78154	1.73959e-06	3.5385e-05	yes
XLOC_007687	XLOC_007687	-	13:28481415-28511890	FVA	AG1	OK	6.26652	3.53877	-0.824416	3.62385	0.000290248	0.00361762	yes
XLOC_007690	XLOC_007690	E2f3	13:29998444-30076176	FVA	AG1	OK	5.58395	9.15361	0.713054	-3.47695	0.000507154	0.00584922	yes
XLOC_007695	XLOC_007695	Serpinb1a	13:32933998-32990008	FVA	AG1	OK	10.9836	4.23676	-1.37432	5.36349	8.16306e-08	2.08793e-06	yes
XLOC_007698	XLOC_007698	Slc22a23	13:34270908-34436640	FVA	AG1	OK	14.237	10.9071	-0.384377	2.8973	0.00376385	0.0315848	yes
XLOC_007699	XLOC_007699	1300014I06Rik	13:34719716-34744503	FVA	AG1	OK	2.31148	4.07382	0.817569	-3.04045	0.00236223	0.0216197	yes
XLOC_007701	XLOC_007701	Eci2	13:35038840-35086225	FVA	AG1	OK	23.63	15.253	-0.631529	2.83858	0.00453148	0.0366145	yes
XLOC_007704	XLOC_007704	Nrn1	13:36817431-36826594	FVA	AG1	OK	64.3385	103.398	0.684449	-5.44979	5.04296e-08	1.33345e-06	yes
XLOC_007708	XLOC_007708	Txndc5	13:38561481-38620262	FVA	AG1	OK	15.3029	11.2223	-0.447436	3.09391	0.0019754	0.0187055	yes
XLOC_007718	XLOC_007718	Gfod1	13:43290529-43427540	FVA	AG1	OK	7.37102	18.053	1.2923	-9.8057	0	0	yes
XLOC_007720	XLOC_007720	Ccdc90a	13:43633775-43655194	FVA	AG1	OK	4.51528	7.63471	0.75776	-4.41619	1.00456e-05	0.000176659	yes
XLOC_007724	XLOC_007724	Atxn1	13:45602827-46060475	FVA	AG1	OK	3.16473	1.79838	-0.815384	3.49408	0.000475695	0.00553598	yes
XLOC_007731	XLOC_007731	A330033J07Rik	13:48335315-48335876	FVA	AG1	OK	0.948233	0.059319	-3.99867	3.63624	0.000276643	0.00346582	yes
XLOC_007736	XLOC_007736	Fam120a	13:48974581-49063217	FVA	AG1	OK	26.2253	36.2322	0.466314	-3.55135	0.000383259	0.00458456	yes
XLOC_007740	XLOC_007740	Fgd3	13:49357929-49415623	FVA	AG1	OK	5.20085	2.96205	-0.812149	2.83809	0.0045384	0.0366512	yes
XLOC_007742	XLOC_007742	Shc3	13:51518756-51662463	FVA	AG1	OK	37.9877	16.5554	-1.19823	9.79205	0	0	yes
XLOC_007744	XLOC_007744	Diras2	13:52598741-52626306	FVA	AG1	OK	22.5398	46.9023	1.05718	-8.46248	0	0	yes
XLOC_007756	XLOC_007756	Gprin1	13:54837985-54851001	FVA	AG1	OK	16.7614	57.0063	1.76597	-4.84084	1.2929e-06	2.67928e-05	yes
XLOC_007762	XLOC_007762	Pdlim7	13:55598858-55615000	FVA	AG1	OK	17.7523	33.9343	0.934736	-4.00748	6.1369e-05	0.000910311	yes
XLOC_007763	XLOC_007763	Ddx41	13:55624589-55638102	FVA	AG1	OK	9.01983	12.3154	0.449287	-2.75212	0.00592114	0.0456124	yes
XLOC_007770	XLOC_007770	Trpc7	13:56962405-56997138	FVA	AG1	OK	4.68755	2.06024	-1.18602	3.03437	0.0024104	0.0219759	yes
XLOC_007772	XLOC_007772	Klhl3	13:58101580-58215197	FVA	AG1	OK	6.84699	21.2432	1.63346	-6.8379	8.03624e-12	3.43435e-10	yes
XLOC_007783	XLOC_007783	Golm1	13:59686699-59777240	FVA	AG1	OK	3.52335	17.768	2.33427	-15.578	0	0	yes
XLOC_007792	XLOC_007792	Ptch1	13:63609635-63666776	FVA	AG1	OK	15.3346	8.15834	-0.910443	5.19979	1.99508e-07	4.80094e-06	yes
XLOC_007796	XLOC_007796	Ctsl	13:64464684-64471672	FVA	AG1	OK	41.7647	30.6185	-0.447883	3.31914	0.000902951	0.00966715	yes
XLOC_007797	XLOC_007797	Cntnap3	13:64837742-65005320	FVA	AG1	OK	1.64258	1.03255	-0.669752	3.17036	0.00152251	0.015102	yes
XLOC_007809	XLOC_007809	Mtrr	13:68699822-68721003	FVA	AG1	OK	2.74083	4.50212	0.71599	-2.98918	0.00279731	0.024801	yes
XLOC_007810	XLOC_007810	Adcy2	13:68757579-69138116	FVA	AG1	OK	19.4859	36.1182	0.890297	-5.4473	5.114e-08	1.35053e-06	yes
XLOC_007811	XLOC_007811	Papd7	13:69636740-69672552	FVA	AG1	OK	9.47706	13.6494	0.526328	-3.6209	0.000293575	0.00364879	yes
XLOC_007813	XLOC_007813	Ube2ql1	13:69841624-69878661	FVA	AG1	OK	35.5574	63.9025	0.845723	-6.62966	3.36462e-11	1.34489e-09	yes
XLOC_007815	XLOC_007815	Adamts16	13:70908450-70980225	FVA	AG1	OK	2.40525	1.23003	-0.967491	3.87105	0.000108369	0.0015087	yes
XLOC_007816	XLOC_007816	Irx1	13:72096056-72100785	FVA	AG1	OK	10.7768	0.17659	-5.93138	3.07502	0.0021049	0.0197142	yes
XLOC_007819	XLOC_007819	Nkd2	13:73955860-73985053	FVA	AG1	OK	1.24983	3.50031	1.48575	-6.7918	1.1074e-11	4.61762e-10	yes
XLOC_007831	XLOC_007831	Cast	13:74875675-74918018	FVA	AG1	OK	3.15868	1.45241	-1.12087	4.00371	6.23562e-05	0.000921417	yes
XLOC_007852	XLOC_007852	4833422C13Rik	13:91832640-91881502	FVA	AG1	OK	2.07657	3.17844	0.614116	-3.24403	0.0011785	0.0122069	yes
XLOC_007854	XLOC_007854	Rasgrf2	13:92019480-92127716	FVA	AG1	OK	17.204	10.3033	-0.739637	3.46581	0.000528641	0.00605634	yes
XLOC_007856	XLOC_007856	Ankrd34b	13:93195958-93211613	FVA	AG1	OK	2.7123	1.00196	-1.43669	3.38772	0.000704763	0.00778262	yes
XLOC_007859	XLOC_007859	Thbs4	13:93521554-93564753	FVA	AG1	OK	0.879315	4.90507	2.47982	-9.49572	0	0	yes
XLOC_007869	XLOC_007869	Crhbp	13:96201324-96215394	FVA	AG1	OK	1.69438	11.4434	2.75569	-12.0876	0	0	yes
XLOC_007870	XLOC_007870	F2r	13:96371614-96388425	FVA	AG1	OK	7.74524	1.33851	-2.53268	12.7163	0	0	yes
XLOC_007871	XLOC_007871	Iqgap2	13:96397130-96661909	FVA	AG1	OK	1.93713	20.6341	3.41304	-12.9509	0	0	yes
XLOC_007879	XLOC_007879	Rgnef	13:98668731-98976384	FVA	AG1	OK	5.06939	11.2636	1.15179	-5.75501	8.66385e-09	2.55679e-07	yes
XLOC_007886	XLOC_007886	Mtap1b	13:100191141-100286871	FVA	AG1	OK	107.415	74.8287	-0.521528	3.71559	0.000202733	0.00264306	yes
XLOC_007887	XLOC_007887	Cartpt	13:100668454-100670734	FVA	AG1	OK	18.5801	2.4616	-2.91609	11.1578	0	0	yes
XLOC_007898	XLOC_007898	-	13:101679688-101687465	FVA	AG1	OK	95.4752	15.5582	-2.61745	3.37861	0.000728542	0.00799662	yes
XLOC_007901	XLOC_007901	Srek1	13:104529179-104564610	FVA	AG1	OK	11.9943	17.0907	0.510865	-2.93614	0.00332325	0.0284911	yes
XLOC_007902	XLOC_007902	Erbb2ip	13:104608863-104710699	FVA	AG1	OK	18.24	12.5829	-0.53564	3.55402	0.000379386	0.00454462	yes
XLOC_007909	XLOC_007909	Ipo11	13:107584518-107727104	FVA	AG1	OK	9.48648	13.8525	0.546198	-3.27985	0.00103861	0.0108856	yes
XLOC_007920	XLOC_007920	Ddx4	13:113388543-113434758	FVA	AG1	OK	0.742621	1.46793	0.983084	-3.33025	0.000867689	0.00935119	yes
XLOC_007922	XLOC_007922	Gpx8	13:113832966-113836629	FVA	AG1	OK	1.27915	3.81425	1.57622	-4.24994	2.13828e-05	0.00034994	yes
XLOC_007929	XLOC_007929	Isl1	13:117088547-117095815	FVA	AG1	OK	2.33526	0.0779152	-4.90553	2.95626	0.00311397	0.0269586	yes
XLOC_007930	XLOC_007930	Parp8	13:117639567-117814514	FVA	AG1	OK	5.56824	7.36746	0.403945	-2.74846	0.00598757	0.0460209	yes
XLOC_007943	XLOC_007943	-	13:3497835-3498880	FVA	AG1	OK	0.956125	0.26951	-1.82686	2.7762	0.00549984	0.0429778	yes
XLOC_007944	XLOC_007944	-	13:3499218-3499736	FVA	AG1	OK	0.844908	0	-1.79769e+308	-1.79769e+308	0.00375263	0.0315164	yes
XLOC_007966	XLOC_007966	Gm16950	13:10359851-10360298	FVA	AG1	OK	1.09121	3.58365	1.7155	-2.80141	0.00508793	0.0403028	yes
XLOC_007974	XLOC_007974	Actn2	13:12358687-12359947	FVA	AG1	OK	0.312953	1.09161	1.80244	-3.297	0.000977231	0.0103264	yes
XLOC_007976	XLOC_007976	Lgals8	13:12531540-12553818	FVA	AG1	OK	3.51257	0.843471	-2.05812	3.13087	0.00174287	0.0169078	yes
XLOC_007981	XLOC_007981	Edaradd	13:12566997-12568665	FVA	AG1	OK	0.974713	0.197448	-2.3035	4.02572	5.68019e-05	0.000851561	yes
XLOC_008008	XLOC_008008	-	13:18212949-18214347	FVA	AG1	OK	1.69466	0.222985	-2.92598	5.05694	4.26029e-07	9.62945e-06	yes
XLOC_008009	XLOC_008009	Pou6f2	13:18214462-18215703	FVA	AG1	OK	1.3184	0.117816	-3.48418	4.2347	2.28861e-05	0.000372961	yes
XLOC_008010	XLOC_008010	Pou6f2	13:18215775-18216569	FVA	AG1	OK	1.57822	0.184209	-3.09889	3.52092	0.000430045	0.00507739	yes
XLOC_008019	XLOC_008019	Zkscan3	13:21478877-21494601	FVA	AG1	OK	1.95489	0.418643	-2.2233	2.93496	0.0033359	0.0285837	yes
XLOC_008086	XLOC_008086	-	13:38322849-38326514	FVA	AG1	OK	0.393308	0.121491	-1.69481	3.37717	0.000732366	0.00803574	yes
XLOC_008116	XLOC_008116	-	13:43815852-43816445	FVA	AG1	OK	0	0.664834	1.79769e+308	1.79769e+308	0.00341705	0.0291194	yes
XLOC_008139	XLOC_008139	-	13:48486410-48486949	FVA	AG1	OK	1.0675	0	-1.79769e+308	-1.79769e+308	0.00095114	0.010108	yes
XLOC_008146	XLOC_008146	Cenpp	13:49563943-49571194	FVA	AG1	OK	0.391181	0.215248	-0.861836	2.75945	0.00578982	0.0447907	yes
XLOC_008147	XLOC_008147	Cenpp	13:49571328-49578221	FVA	AG1	OK	0.548407	0.959293	0.806725	-3.29629	0.000979708	0.0103476	yes
XLOC_008148	XLOC_008148	Cenpp	13:49578316-49580111	FVA	AG1	OK	0.815636	2.01941	1.30794	-4.02449	5.70981e-05	0.000855171	yes
XLOC_008159	XLOC_008159	-	13:51300388-51301446	FVA	AG1	OK	10.9101	17.7431	0.701583	-3.63617	0.000276723	0.00346582	yes
XLOC_008161	XLOC_008161	-	13:51468119-51468866	FVA	AG1	OK	0.563838	1.70072	1.59279	-2.76657	0.00566502	0.0440347	yes
XLOC_008170	XLOC_008170	-	13:51662518-51664926	FVA	AG1	OK	11.008	2.97263	-1.88874	10.0861	0	0	yes
XLOC_008185	XLOC_008185	-	13:53534324-53535884	FVA	AG1	OK	0.257596	0.71772	1.47831	-2.7162	0.00660352	0.0498377	yes
XLOC_008195	XLOC_008195	-	13:54553998-54556816	FVA	AG1	OK	0.877654	1.55689	0.82694	-2.9617	0.00305948	0.0265912	yes
XLOC_008205	XLOC_008205	-	13:55044690-55050234	FVA	AG1	OK	0.232218	0.491089	1.0805	-3.22494	0.00125998	0.0129295	yes
XLOC_008217	XLOC_008217	Zfp346	13:55206629-55236412	FVA	AG1	OK	1.56682	0.697318	-1.16795	3.05401	0.00225801	0.0208574	yes
XLOC_008334	XLOC_008334	Zfp369	13:65401260-65403865	FVA	AG1	OK	2.27893	3.60018	0.65971	-2.97953	0.00288692	0.0254348	yes
XLOC_008342	XLOC_008342	-	13:67105717-67110732	FVA	AG1	OK	0.346953	0.998556	1.5251	-5.14689	2.64846e-07	6.24673e-06	yes
XLOC_008353	XLOC_008353	1700001L19Rik	13:68736140-68754207	FVA	AG1	OK	0.380893	1.76308	2.21064	-5.46035	4.75192e-08	1.26682e-06	yes
XLOC_008365	XLOC_008365	BC018507	13:70722540-70726833	FVA	AG1	OK	0.175056	0.951917	2.44302	-6.34142	2.27659e-10	8.22715e-09	yes
XLOC_008373	XLOC_008373	-	13:72757804-72761844	FVA	AG1	OK	0.909276	0	-1.79769e+308	-1.79769e+308	0.00144909	0.0144993	yes
XLOC_008374	XLOC_008374	-	13:72762960-72763512	FVA	AG1	OK	0.76198	0	-1.79769e+308	-1.79769e+308	0.0037188	0.0313004	yes
XLOC_008375	XLOC_008375	-	13:72764053-72764375	FVA	AG1	OK	2.84612	0	-1.79769e+308	-1.79769e+308	0.00125123	0.0128569	yes
XLOC_008376	XLOC_008376	-	13:72764803-72765907	FVA	AG1	OK	1.09939	0.0355835	-4.94935	3.20074	0.00137075	0.0138319	yes
XLOC_008418	XLOC_008418	A830082K12Rik	13:78377811-78379650	FVA	AG1	OK	0.923753	0.0412218	-4.48603	4.16142	3.1627e-05	0.000500877	yes
XLOC_008420	XLOC_008420	-	13:78380427-78383826	FVA	AG1	OK	1.11803	0.289612	-1.94876	5.57141	2.52682e-08	6.98787e-07	yes
XLOC_008432	XLOC_008432	-	13:78582035-78582986	FVA	AG1	OK	1.88139	0.363173	-2.37307	4.04306	5.2758e-05	0.000797904	yes
XLOC_008441	XLOC_008441	9330111N05Rik	13:81221895-81222620	FVA	AG1	OK	1.21001	0.135857	-3.15485	2.91673	0.00353723	0.0299927	yes
XLOC_008442	XLOC_008442	9330111N05Rik	13:81225674-81227000	FVA	AG1	OK	1.45381	0.198275	-2.87426	4.55685	5.19261e-06	9.69802e-05	yes
XLOC_008479	XLOC_008479	-	13:94190942-94193536	FVA	AG1	OK	0.131477	0.454773	1.79033	-3.17781	0.0014839	0.014795	yes
XLOC_008486	XLOC_008486	Otp	13:95653779-95655046	FVA	AG1	OK	3.5292	0.0665984	-5.72771	5.50023	3.79286e-08	1.0244e-06	yes
XLOC_008503	XLOC_008503	Gm11019	13:98268354-98269309	FVA	AG1	OK	0.860869	0.183997	-2.22612	2.73758	0.00618929	0.0473241	yes
XLOC_008506	XLOC_008506	-	13:98280728-98282571	FVA	AG1	OK	1.16305	0.201041	-2.53235	4.74918	2.04242e-06	4.1005e-05	yes
XLOC_008513	XLOC_008513	-	13:99100366-99101134	FVA	AG1	OK	0.193255	1.09034	2.4962	-2.74565	0.00603913	0.046325	yes
XLOC_008564	XLOC_008564	-	13:109100310-109100974	FVA	AG1	OK	2.42342	4.95839	1.03283	-2.95695	0.00310697	0.0269207	yes
XLOC_008603	XLOC_008603	-	13:114951651-114952722	FVA	AG1	OK	0.148132	0.778446	2.39372	-2.84287	0.00447087	0.0362289	yes
XLOC_008608	XLOC_008608	Isl1	13:117096812-117097163	FVA	AG1	OK	1.81773	0	-1.79769e+308	-1.79769e+308	0.00352863	0.0299526	yes
XLOC_008625	XLOC_008625	Flnb	14:8650462-8784100	FVA	AG1	OK	23.2572	15.1416	-0.619157	4.00089	6.31044e-05	0.000930248	yes
XLOC_008629	XLOC_008629	Kctd6	14:9046818-9056929	FVA	AG1	OK	10.0163	20.0061	0.998093	-5.2432	1.57819e-07	3.85782e-06	yes
XLOC_008630	XLOC_008630	Ptprg	14:12385969-13074548	FVA	AG1	OK	7.57512	11.7045	0.627723	-3.24389	0.0011791	0.012209	yes
XLOC_008633	XLOC_008633	Synpr	14:14116562-14448001	FVA	AG1	OK	16.9209	44.555	1.39678	-9.07711	0	0	yes
XLOC_008634	XLOC_008634	Sntn	14:14505501-14515884	FVA	AG1	OK	1.13104	0.457819	-1.3048	2.7549	0.00587106	0.0452832	yes
XLOC_008637	XLOC_008637	Slc4a7	14:15535674-15632459	FVA	AG1	OK	4.78765	7.99957	0.740604	-3.73126	0.000190521	0.00250179	yes
XLOC_008641	XLOC_008641	Thrb	14:18492187-18872576	FVA	AG1	OK	2.98899	4.76419	0.672573	-3.37659	0.000733904	0.0080469	yes
XLOC_008645	XLOC_008645	Nid2	14:20570488-20639387	FVA	AG1	OK	0.709072	1.92178	1.43844	-2.9588	0.00308839	0.0268048	yes
XLOC_008646	XLOC_008646	Nudt13	14:21113903-21136815	FVA	AG1	OK	5.38726	8.27837	0.619796	-2.78124	0.00541524	0.0424455	yes
XLOC_008654	XLOC_008654	Samd8	14:22569821-22617949	FVA	AG1	OK	7.26314	10.9815	0.59641	-3.30521	0.000949045	0.0100907	yes
XLOC_008661	XLOC_008661	Anxa11	14:26661625-26985939	FVA	AG1	OK	10.7765	31.6012	1.55209	-7.57709	3.53051e-14	1.87111e-12	yes
XLOC_008663	XLOC_008663	Arf4	14:27457607-27478017	FVA	AG1	OK	18.2699	24.2882	0.410782	-3.05423	0.00225642	0.0208489	yes
XLOC_008669	XLOC_008669	Arhgef3	14:28149181-28217185	FVA	AG1	OK	9.57489	20.8763	1.12454	-5.74622	9.12581e-09	2.67523e-07	yes
XLOC_008672	XLOC_008672	Erc2	14:28435627-29291725	FVA	AG1	OK	12.3111	35.3241	1.52069	-9.54971	0	0	yes
XLOC_008679	XLOC_008679	Tkt	14:31361582-31387960	FVA	AG1	OK	46.6809	29.3665	-0.668661	5.35884	8.37585e-08	2.13975e-06	yes
XLOC_008690	XLOC_008690	Bap1	14:32064611-32073403	FVA	AG1	OK	26.2121	33.9004	0.371071	-2.91327	0.00357661	0.0302519	yes
XLOC_008700	XLOC_008700	Ercc6	14:33326694-33391286	FVA	AG1	OK	2.77236	5.68246	1.0354	-5.13216	2.86435e-07	6.72001e-06	yes
XLOC_008703	XLOC_008703	Arhgap22	14:34171243-34183117	FVA	AG1	OK	2.41663	0.959128	-1.3332	3.10071	0.00193059	0.0183373	yes
XLOC_008709	XLOC_008709	-	14:34348661-34357643	FVA	AG1	OK	1.45809	0.297406	-2.29357	2.75391	0.00588874	0.0453855	yes
XLOC_008712	XLOC_008712	Gdf10	14:34736790-34748690	FVA	AG1	OK	1.89503	4.01835	1.08438	-4.63593	3.55339e-06	6.8364e-05	yes
XLOC_008719	XLOC_008719	Gm8104	14:43787614-43793379	FVA	AG1	OK	1.78852	0.022515	-6.31174	3.27796	0.0010456	0.0109515	yes
XLOC_008728	XLOC_008728	Mapk1ip1l	14:47917950-47942878	FVA	AG1	OK	7.94577	11.6477	0.551788	-3.40594	0.000659359	0.00736813	yes
XLOC_008730	XLOC_008730	Fbxo34	14:48092213-48151818	FVA	AG1	OK	12.361	21.5158	0.799596	-4.16615	3.09788e-05	0.000491847	yes
XLOC_008739	XLOC_008739	Gm16836	14:51482176-51500030	FVA	AG1	OK	18.3516	6.57278	-1.48133	3.55844	0.000373058	0.00448162	yes
XLOC_008743	XLOC_008743	Rnase6	14:51743562-51750304	FVA	AG1	OK	1.0408	0.0807227	-3.68858	3.11167	0.00186033	0.0178234	yes
XLOC_008744	XLOC_008744	Mettl17	14:52504406-52511900	FVA	AG1	OK	4.65859	8.71295	0.903269	-3.54391	0.000394245	0.00470142	yes
XLOC_008745	XLOC_008745	Arhgef40	14:52604589-52625338	FVA	AG1	OK	9.95191	4.66374	-1.09349	5.73355	9.83477e-09	2.86945e-07	yes
XLOC_008749	XLOC_008749	Abhd4	14:54873851-54889160	FVA	AG1	OK	26.7675	18.8924	-0.502675	3.10331	0.00191366	0.0181997	yes
XLOC_008754	XLOC_008754	Rem2	14:55095014-55099323	FVA	AG1	OK	2.18772	6.23107	1.51005	-6.3738	1.84397e-10	6.77467e-09	yes
XLOC_008765	XLOC_008765	Cpne6	14:56128108-56137437	FVA	AG1	OK	29.3195	175.157	2.57871	-16.375	0	0	yes
XLOC_008770	XLOC_008770	Rec8	14:56237048-56244053	FVA	AG1	OK	6.394	1.44259	-2.14806	6.24169	4.32855e-10	1.50443e-08	yes
XLOC_008775	XLOC_008775	Nynrin	14:56472954-56493575	FVA	AG1	OK	4.36289	2.00022	-1.12513	6.88945	5.60108e-12	2.44093e-10	yes
XLOC_008777	XLOC_008777	Parp4	14:57203002-57278600	FVA	AG1	OK	1.83232	1.17632	-0.639394	2.7922	0.00523502	0.0412737	yes
XLOC_008792	XLOC_008792	Spata13	14:61253590-61383393	FVA	AG1	OK	2.11699	3.46683	0.711603	-3.11105	0.00186424	0.0178536	yes
XLOC_008794	XLOC_008794	Sacs	14:61792157-61834401	FVA	AG1	OK	3.13491	0	-1.79769e+308	-1.79769e+308	0.00232758	0.0213671	yes
XLOC_008804	XLOC_008804	Fam167a	14:64060779-64084314	FVA	AG1	OK	1.44205	0.723363	-0.995328	3.8718	0.000108034	0.00150526	yes
XLOC_008809	XLOC_008809	Prss52	14:64717501-64723515	FVA	AG1	OK	0.11497	0.662005	2.52558	-6.51957	7.05103e-11	2.71649e-09	yes
XLOC_008810	XLOC_008810	A930011O12Rik	14:65193346-65213121	FVA	AG1	OK	35.1559	54.795	0.640275	-4.25681	2.07365e-05	0.000340626	yes
XLOC_008811	XLOC_008811	Kif13b	14:65332905-65428523	FVA	AG1	OK	25.0095	8.08314	-1.62949	3.55944	0.000371641	0.00447156	yes
XLOC_008814	XLOC_008814	Zfp395	14:65977230-66017741	FVA	AG1	OK	4.3132	2.31239	-0.899373	4.85424	1.20851e-06	2.5145e-05	yes
XLOC_008828	XLOC_008828	Nefm	14:68737575-68749427	FVA	AG1	OK	37.6136	22.1574	-0.763467	2.8986	0.00374829	0.0314949	yes
XLOC_008835	XLOC_008835	Egr3	14:70476733-70482739	FVA	AG1	OK	2.78882	21.8065	2.96703	-14.8246	0	0	yes
XLOC_008838	XLOC_008838	Phyhip	14:70856734-70868717	FVA	AG1	OK	49.5605	167.229	1.75456	-11.0366	0	0	yes
XLOC_008841	XLOC_008841	Hr	14:70951986-70973351	FVA	AG1	OK	6.73375	2.45146	-1.45777	9.00392	0	0	yes
XLOC_008856	XLOC_008856	Kctd4	14:76296593-76410721	FVA	AG1	OK	3.01109	12.1018	2.00686	-11.1357	0	0	yes
XLOC_008857	XLOC_008857	Gtf2f2,SNORA5	14:76296593-76410721	FVA	AG1	OK	0.707422	3.80969	2.42903	-3.11281	0.00185316	0.0177768	yes
XLOC_008859	XLOC_008859	-	14:76651174-76652137	FVA	AG1	OK	1.14826	5.89337	2.35964	-4.86668	1.1349e-06	2.37737e-05	yes
XLOC_008865	XLOC_008865	1300010F03Rik	14:79248976-79602238	FVA	AG1	OK	9.31136	5.73549	-0.699076	3.98834	6.6538e-05	0.000973894	yes
XLOC_008867	XLOC_008867	Kbtbd7	14:79826150-79830851	FVA	AG1	OK	8.0366	11.6914	0.540787	-3.73647	0.000186622	0.00246211	yes
XLOC_008871	XLOC_008871	Gm6999,Olfm4	14:80298155-80422831	FVA	AG1	OK	0.788226	2.64104	1.74442	-4.37185	1.23196e-05	0.000212536	yes
XLOC_008876	XLOC_008876	Klf5	14:99698367-99714246	FVA	AG1	OK	0.947442	1.99108	1.07144	-4.0193	5.83704e-05	0.000870009	yes
XLOC_008878	XLOC_008878	Lmo7	14:102239367-102334000	FVA	AG1	OK	9.33756	24.8817	1.41397	-8.10806	4.44089e-16	2.74429e-14	yes
XLOC_008879	XLOC_008879	Gm17446	14:103375677-103381816	FVA	AG1	OK	10.4726	28.9755	1.46821	-11.1124	0	0	yes
XLOC_008888	XLOC_008888	Slitrk5	14:111839841-112086048	FVA	AG1	OK	5.322	11.9863	1.17134	-6.80231	1.02955e-11	4.3163e-10	yes
XLOC_008895	XLOC_008895	Gm4675	14:118635947-118636266	FVA	AG1	OK	1.47122	2.80689	0.931957	-3.0536	0.00226113	0.02088	yes
XLOC_008899	XLOC_008899	Hs6st3	14:120268041-120276165	FVA	AG1	OK	2.65612	4.63625	0.803638	-2.94923	0.00318567	0.0275101	yes
XLOC_008900	XLOC_008900	Mbnl2	14:120674793-120840134	FVA	AG1	OK	40.1258	53.3092	0.409853	-3.00353	0.00266869	0.0238729	yes
XLOC_008901	XLOC_008901	Rap2a	14:120877688-120906566	FVA	AG1	OK	16.5484	26.189	0.662275	-5.0517	4.37886e-07	9.88298e-06	yes
XLOC_008904	XLOC_008904	Ubac2	14:122277837-122420492	FVA	AG1	OK	11.1102	15.4688	0.47747	-3.02956	0.00244911	0.0222305	yes
XLOC_008908	XLOC_008908	Zic5	14:122864214-122868104	FVA	AG1	OK	2.40326	0.318273	-2.91666	9.56843	0	0	yes
XLOC_008909	XLOC_008909	Zic2	14:122878370-122879602	FVA	AG1	OK	2.83004	0.692462	-2.03102	5.34045	9.27172e-08	2.3405e-06	yes
XLOC_008912	XLOC_008912	Itgbl1	14:124059341-124591909	FVA	AG1	OK	0.208623	1.62002	2.95704	-4.28067	1.86331e-05	0.000309864	yes
XLOC_008920	XLOC_008920	Fezf2	14:13171508-13179325	FVA	AG1	OK	0.295878	7.67216	4.69656	-13.5163	0	0	yes
XLOC_008926	XLOC_008926	Lrrc3b	14:16189970-16271273	FVA	AG1	OK	12.6011	3.8199	-1.72195	8.44573	0	0	yes
XLOC_008931	XLOC_008931	Nr1d2	14:19036568-19071615	FVA	AG1	OK	24.9798	14.9858	-0.73717	4.20887	2.56648e-05	0.000414527	yes
XLOC_008934	XLOC_008934	Ube2e2	14:19401902-19726170	FVA	AG1	OK	6.84489	12.6346	0.884281	-5.92868	3.05387e-09	9.59904e-08	yes
XLOC_008944	XLOC_008944	Ppp3cb	14:21317511-21365794	FVA	AG1	OK	37.9584	65.7121	0.791738	-5.34747	8.91914e-08	2.25703e-06	yes
XLOC_008945	XLOC_008945	Usp54	14:21367993-21462382	FVA	AG1	OK	17.1761	12.0551	-0.510756	3.42652	0.000611368	0.00689669	yes
XLOC_008950	XLOC_008950	Zfp503	14:22803192-22806661	FVA	AG1	OK	2.46323	0.95968	-1.35992	5.30043	1.15533e-07	2.87418e-06	yes
XLOC_008968	XLOC_008968	Prkcd	14:31408538-31439381	FVA	AG1	OK	291.214	20.1453	-3.85356	8.0937	6.66134e-16	4.06763e-14	yes
XLOC_008970	XLOC_008970	Itih3	14:31721760-31736976	FVA	AG1	OK	45.2932	6.99278	-2.69536	10.6039	0	0	yes
XLOC_008977	XLOC_008977	Dnahc1	14:32073482-32125180	FVA	AG1	OK	1.14565	0.302173	-1.92272	2.86452	0.00417637	0.0342194	yes
XLOC_008986	XLOC_008986	1700024G13Rik	14:33189320-33201550	FVA	AG1	OK	2.20488	0.879163	-1.3265	2.74685	0.00601706	0.0462131	yes
XLOC_008991	XLOC_008991	Gprin2	14:35004029-35008979	FVA	AG1	OK	1.10458	0.219843	-2.32895	7.15532	8.34666e-13	3.93133e-11	yes
XLOC_008993	XLOC_008993	Sncg	14:35183470-35187872	FVA	AG1	OK	30.4461	4.10514	-2.89075	12.0494	0	0	yes
XLOC_008998	XLOC_008998	Cdhr1	14:37891040-37911580	FVA	AG1	OK	0.539607	1.77654	1.71909	-6.37202	1.86557e-10	6.83776e-09	yes
XLOC_009010	XLOC_009010	Bmp4	14:47003235-47006948	FVA	AG1	OK	0.384584	1.34777	1.80921	-4.17886	2.92971e-05	0.000468057	yes
XLOC_009012	XLOC_009012	Gmfb	14:47427760-47441959	FVA	AG1	OK	31.4049	50.8101	0.694126	-5.58204	2.37708e-08	6.60494e-07	yes
XLOC_009016	XLOC_009016	Otx2	14:49277354-49287141	FVA	AG1	OK	3.68429	1.48196	-1.31388	3.56165	0.000368528	0.00443929	yes
XLOC_009019	XLOC_009019	3632451O06Rik	14:50295507-50403068	FVA	AG1	OK	5.47109	3.62398	-0.594254	4.11893	3.80643e-05	0.000593395	yes
XLOC_009022	XLOC_009022	Tep1	14:51482176-51500030	FVA	AG1	OK	4.15891	1.8953	-1.13378	3.05484	0.00225182	0.0208189	yes
XLOC_009023	XLOC_009023	Klhl33	14:51509596-51517079	FVA	AG1	OK	3.06641	1.84833	-0.73033	2.90248	0.00370215	0.0311942	yes
XLOC_009026	XLOC_009026	Ndrg2	14:52524785-52533853	FVA	AG1	OK	397.833	267.214	-0.574167	4.0292	5.59662e-05	0.00084241	yes
XLOC_009042	XLOC_009042	Cdh24	14:55250162-55260122	FVA	AG1	OK	5.22396	9.57117	0.873551	-3.92525	8.66386e-05	0.00123135	yes
XLOC_009051	XLOC_009051	Zfhx2	14:55671957-55711273	FVA	AG1	OK	4.20045	7.20189	0.77783	-4.29552	1.74285e-05	0.000290837	yes
XLOC_009075	XLOC_009075	Gjb6	14:57742086-57752560	FVA	AG1	OK	35.333	23.7836	-0.571053	3.5806	0.000342806	0.00417501	yes
XLOC_009085	XLOC_009085	Atp8a2	14:60257283-60800709	FVA	AG1	OK	9.35451	3.9532	-1.24264	4.79479	1.62847e-06	3.33221e-05	yes
XLOC_009089	XLOC_009089	Tnfrsf19	14:61582693-61665627	FVA	AG1	OK	8.50686	13.9509	0.713658	-4.34001	1.42478e-05	0.000242284	yes
XLOC_009091	XLOC_009091	Kpna3	14:61983988-62058677	FVA	AG1	OK	16.5077	21.9143	0.408734	-3.07957	0.00207303	0.0194511	yes
XLOC_009095	XLOC_009095	Dleu7	14:62911671-62912087	FVA	AG1	OK	6.24516	3.30022	-0.920177	3.68567	0.000228104	0.00293787	yes
XLOC_009102	XLOC_009102	Gm17116	14:64723635-64732943	FVA	AG1	OK	0.351439	2.03467	2.53344	-7.76541	8.21565e-15	4.60703e-13	yes
XLOC_009103	XLOC_009103	Msra	14:64736868-65069829	FVA	AG1	OK	2.76277	5.82664	1.07655	-6.0044	1.92043e-09	6.26584e-08	yes
XLOC_009105	XLOC_009105	Extl3	14:65670703-65768723	FVA	AG1	OK	30.0772	22.46	-0.421313	3.03098	0.00243764	0.0221695	yes
XLOC_009107	XLOC_009107	Pnoc	14:66020308-66044408	FVA	AG1	OK	15.043	7.01565	-1.10044	4.86022	1.17256e-06	2.44631e-05	yes
XLOC_009109	XLOC_009109	Scara3	14:66537840-66572563	FVA	AG1	OK	2.97582	5.96731	1.00379	-3.97237	7.11605e-05	0.00103081	yes
XLOC_009110	XLOC_009110	Ephx2	14:66703214-66743397	FVA	AG1	OK	4.9749	8.0808	0.699829	-2.85371	0.00432124	0.0352197	yes
XLOC_009111	XLOC_009111	Ptk2b	14:66771194-66900124	FVA	AG1	OK	36.6401	193.811	2.40316	-17.624	0	0	yes
XLOC_009117	XLOC_009117	Slc25a37	14:69859904-69903083	FVA	AG1	OK	10.7597	6.17963	-0.80004	3.60576	0.000311236	0.00383589	yes
XLOC_009129	XLOC_009129	Bmp1	14:70874363-70920628	FVA	AG1	OK	11.8031	24.5263	1.05517	-5.85763	4.6951e-09	1.44491e-07	yes
XLOC_009130	XLOC_009130	Sftpc	14:70920764-70922642	FVA	AG1	OK	0.111766	1.03041	3.20466	-2.76182	0.00574794	0.0445559	yes
XLOC_009144	XLOC_009144	Dnajc15	14:78213804-78274932	FVA	AG1	OK	13.4044	9.87633	-0.440661	2.83087	0.00464213	0.0373327	yes
XLOC_009147	XLOC_009147	Dgkh	14:78959077-79132210	FVA	AG1	OK	6.59624	10.0676	0.610009	-3.94443	7.99891e-05	0.00114527	yes
XLOC_009149	XLOC_009149	1190002H23Rik	14:79687939-79701440	FVA	AG1	OK	4.31814	6.86847	0.669577	-3.06433	0.00218158	0.0202787	yes
XLOC_009153	XLOC_009153	Pcdh8	14:80166521-80171114	FVA	AG1	OK	7.6838	17.6864	1.20274	-8.23822	2.22045e-16	1.40015e-14	yes
XLOC_009158	XLOC_009158	Pcdh20	14:88858662-88871350	FVA	AG1	OK	2.28512	11.8634	2.37618	-11.7771	0	0	yes
XLOC_009159	XLOC_009159	Pcdh9	14:94260721-94289932	FVA	AG1	OK	24.0423	16.8392	-0.513748	3.64354	0.00026891	0.00338719	yes
XLOC_009160	XLOC_009160	Klhl1	14:96504483-96918262	FVA	AG1	OK	2.84804	0.578982	-2.29838	4.59254	4.37875e-06	8.2648e-05	yes
XLOC_009164	XLOC_009164	Klf12	14:100265398-100683952	FVA	AG1	OK	7.8576	4.52593	-0.795876	5.80154	6.57076e-09	1.98848e-07	yes
XLOC_009167	XLOC_009167	Gm9307	14:103409438-103409867	FVA	AG1	OK	29.1194	9.56028	-1.60685	3.98955	6.61985e-05	0.000971225	yes
XLOC_009169	XLOC_009169	Mycbp2	14:103512451-103746016	FVA	AG1	OK	35.0988	23.9659	-0.550435	3.8512	0.000117541	0.00161989	yes
XLOC_009170	XLOC_009170	Ednrb	14:104213799-104243684	FVA	AG1	OK	14.4501	10.1553	-0.508847	2.77876	0.00545673	0.0427274	yes
XLOC_009171	XLOC_009171	Pou4f1	14:104861294-104865400	FVA	AG1	OK	2.28726	0	-1.79769e+308	-1.79769e+308	5.59777e-05	0.00084241	yes
XLOC_009175	XLOC_009175	Spry2	14:106291022-106296346	FVA	AG1	OK	8.43169	14.486	0.780767	-4.65459	3.24624e-06	6.30832e-05	yes
XLOC_009178	XLOC_009178	Slitrk6	14:111147307-111154449	FVA	AG1	OK	6.868	0.121229	-5.82408	15.166	0	0	yes
XLOC_009189	XLOC_009189	Zic5	14:122862879-122863497	FVA	AG1	OK	4.09103	1.18977	-1.78178	8.04352	8.88178e-16	5.38097e-14	yes
XLOC_009190	XLOC_009190	2610035F20Rik	14:122869953-122871207	FVA	AG1	OK	2.86704	0.141222	-4.34352	7.0711	1.53699e-12	7.01477e-11	yes
XLOC_009193	XLOC_009193	Nalcn	14:123675826-124026486	FVA	AG1	OK	21.1231	14.9358	-0.500048	3.21458	0.00130636	0.0132951	yes
XLOC_009199	XLOC_009199	Abhd6	14:8890960-8894243	FVA	AG1	OK	0.849814	2.02998	1.25625	-4.797	1.61061e-06	3.29785e-05	yes
XLOC_009202	XLOC_009202	-	14:10153625-10154080	FVA	AG1	OK	1.04267	0	-1.79769e+308	-1.79769e+308	0.00398311	0.0330124	yes
XLOC_009369	XLOC_009369	Chat	14:33220633-33221348	FVA	AG1	OK	2.26164	0.0428345	-5.72246	3.07961	0.00207271	0.0194511	yes
XLOC_009372	XLOC_009372	Chat	14:33275636-33277830	FVA	AG1	OK	1.40972	0.0101605	-7.11629	3.70366	0.000212513	0.00275545	yes
XLOC_009381	XLOC_009381	-	14:34998910-35003927	FVA	AG1	OK	1.35306	0.381875	-1.82506	6.73746	1.61184e-11	6.66704e-10	yes
XLOC_009404	XLOC_009404	-	14:41107573-41107756	FVA	AG1	OK	175.479	392.098	1.15992	-4.81103	1.50157e-06	3.08891e-05	yes
XLOC_009405	XLOC_009405	Sh2d4b	14:41624891-41626606	FVA	AG1	OK	0.806974	0.3011	-1.42228	2.88899	0.00386487	0.0322695	yes
XLOC_009416	XLOC_009416	Styx	14:45980859-45981764	FVA	AG1	OK	0.43485	0	-1.79769e+308	-1.79769e+308	0.00205523	0.0193134	yes
XLOC_009475	XLOC_009475	Psmb5	14:55233530-55234659	FVA	AG1	OK	0.80843	1.90739	1.2384	-3.1231	0.00178959	0.0172634	yes
XLOC_009498	XLOC_009498	-	14:57322327-57325409	FVA	AG1	OK	0.587339	0.225467	-1.38127	3.25837	0.00112053	0.0116691	yes
XLOC_009499	XLOC_009499	-	14:57325820-57326861	FVA	AG1	OK	0.743369	0.0543663	-3.77329	2.84752	0.00440614	0.0358263	yes
XLOC_009519	XLOC_009519	Zdhhc20	14:58453984-58509130	FVA	AG1	OK	1.56815	0.370238	-2.08254	3.21463	0.00130611	0.0132951	yes
XLOC_009591	XLOC_009591	-	14:66502647-66503951	FVA	AG1	OK	0.0618256	0.555398	3.16725	-2.82909	0.00466812	0.037493	yes
XLOC_009593	XLOC_009593	-	14:66580224-66580394	FVA	AG1	OK	233.673	379.501	0.69961	-2.83911	0.00452399	0.0365752	yes
XLOC_009613	XLOC_009613	-	14:68661914-68662732	FVA	AG1	OK	1.00646	0.17148	-2.55317	2.79956	0.00511728	0.0404901	yes
XLOC_009622	XLOC_009622	Pebp4	14:70416351-70421359	FVA	AG1	OK	0.143061	0.912816	2.67369	-6.60563	3.95823e-11	1.57605e-09	yes
XLOC_009624	XLOC_009624	Pebp4	14:70422508-70425180	FVA	AG1	OK	0.0888861	0.57262	2.68755	-4.2314	2.32242e-05	0.000378072	yes
XLOC_009626	XLOC_009626	Pebp4	14:70426470-70428376	FVA	AG1	OK	0.0925834	0.419859	2.18108	-2.8348	0.00458541	0.0369072	yes
XLOC_009699	XLOC_009699	-	14:77035986-77036596	FVA	AG1	OK	41.1812	88.9084	1.11033	-6.6848	2.31237e-11	9.45075e-10	yes
XLOC_009714	XLOC_009714	-	14:79725950-79731164	FVA	AG1	OK	0.337352	0.708147	1.06979	-3.54336	0.000395066	0.0047094	yes
XLOC_009732	XLOC_009732	-	14:88857074-88858557	FVA	AG1	OK	0.195961	1.89675	3.27489	-5.60584	2.07251e-08	5.81094e-07	yes
XLOC_009733	XLOC_009733	Pcdh9	14:93594051-93594922	FVA	AG1	OK	18.5993	37.9089	1.02729	-5.78705	7.16336e-09	2.1447e-07	yes
XLOC_009735	XLOC_009735	Pcdh9	14:93599393-93600994	FVA	AG1	OK	0.292756	0.875204	1.57992	-3.16556	0.00154787	0.0152994	yes
XLOC_009738	XLOC_009738	Pcdh9	14:94108955-94112113	FVA	AG1	OK	0.400757	2.19705	2.45477	-7.74673	9.32587e-15	5.18257e-13	yes
XLOC_009739	XLOC_009739	Pcdh9	14:94112341-94114404	FVA	AG1	OK	0.275623	1.75738	2.67266	-6.23112	4.63113e-10	1.60059e-08	yes
XLOC_009772	XLOC_009772	Gm17446	14:103381986-103385385	FVA	AG1	OK	0.701318	2.13212	1.60415	-5.91223	3.37502e-09	1.05655e-07	yes
XLOC_009788	XLOC_009788	-	14:104688723-104689225	FVA	AG1	OK	0.913177	0	-1.79769e+308	-1.79769e+308	0.00334857	0.0286525	yes
XLOC_009816	XLOC_009816	-	14:111831450-111839678	FVA	AG1	OK	0.164678	1.05076	2.67371	-8.77978	0	0	yes
XLOC_009822	XLOC_009822	-	14:112089085-112091453	FVA	AG1	OK	0.171313	0.681832	1.99278	-3.83596	0.000125073	0.00171071	yes
XLOC_009835	XLOC_009835	-	14:119105452-119106907	FVA	AG1	OK	1.01003	2.82421	1.48344	-4.55677	5.19458e-06	9.69802e-05	yes
XLOC_009843	XLOC_009843	Hs6st3	14:119882722-119884108	FVA	AG1	OK	0.316066	1.19827	1.92266	-3.78318	0.000154836	0.00207644	yes
XLOC_009884	XLOC_009884	Sepp1	15:3220711-3230849	FVA	AG1	OK	107.876	60.8836	-0.825243	6.73123	1.6823e-11	6.93988e-10	yes
XLOC_009886	XLOC_009886	Plcxd3	15:4325480-4531512	FVA	AG1	OK	4.47321	3.16973	-0.49695	3.2148	0.00130536	0.0132936	yes
XLOC_009892	XLOC_009892	Rictor	15:6658354-6750398	FVA	AG1	OK	7.35711	5.61226	-0.390558	2.9155	0.0035512	0.0300781	yes
XLOC_009893	XLOC_009893	Lifr	15:7079657-7147475	FVA	AG1	OK	3.48082	1.62706	-1.09716	5.2892	1.22852e-07	3.044e-06	yes
XLOC_009906	XLOC_009906	Mtmr12	15:12134871-12204259	FVA	AG1	OK	3.50179	10.7054	1.61218	-9.20198	0	0	yes
XLOC_009909	XLOC_009909	Cdh9	15:16658334-16786962	FVA	AG1	OK	1.71823	12.3303	2.84322	-12.1475	0	0	yes
XLOC_009912	XLOC_009912	Cdh18	15:22966150-23405990	FVA	AG1	OK	2.67195	0	-1.79769e+308	-1.79769e+308	0.00536883	0.0421566	yes
XLOC_009915	XLOC_009915	Fam134b	15:25772933-25903492	FVA	AG1	OK	20.1512	10.0369	-1.00555	5.38223	7.35698e-08	1.89905e-06	yes
XLOC_009925	XLOC_009925	Sdc2	15:32708526-32964781	FVA	AG1	OK	14.887	10.0097	-0.572652	3.44842	0.000563886	0.00641729	yes
XLOC_009926	XLOC_009926	Pgcp	15:33012856-33524261	FVA	AG1	OK	7.85679	4.62018	-0.76599	3.11203	0.00185803	0.0178124	yes
XLOC_009929	XLOC_009929	Matn2	15:34236297-34366111	FVA	AG1	OK	3.12698	16.1254	2.36649	-10.462	0	0	yes
XLOC_009930	XLOC_009930	BC030476	15:34383041-34405758	FVA	AG1	OK	0.892676	0.489637	-0.866425	3.08253	0.00205248	0.0192934	yes
XLOC_009931	XLOC_009931	Pop1	15:34425107-34460815	FVA	AG1	OK	2.22351	4.08028	0.875827	-3.07107	0.00213292	0.0199404	yes
XLOC_009937	XLOC_009937	-	15:36656364-36674208	FVA	AG1	OK	0.425621	3.62317	3.08961	-3.28902	0.00100537	0.010584	yes
XLOC_009943	XLOC_009943	Cthrc1	15:38908440-38918627	FVA	AG1	OK	13.7729	4.09064	-1.75144	5.63679	1.73248e-08	4.90651e-07	yes
XLOC_009945	XLOC_009945	Rims2	15:39029602-39517732	FVA	AG1	OK	18.5191	9.58557	-0.950074	4.50409	6.66595e-06	0.000121657	yes
XLOC_009946	XLOC_009946	Tm7sf4	15:39586085-39586807	FVA	AG1	OK	0.637939	0	-1.79769e+308	-1.79769e+308	0.00144762	0.0144932	yes
XLOC_009947	XLOC_009947	Zfpm2	15:40486615-40937540	FVA	AG1	OK	1.91857	5.00594	1.38361	-7.3289	2.32037e-13	1.14711e-11	yes
XLOC_009954	XLOC_009954	2310069G16Rik,A930017M01Rik	15:44503349-44716278	FVA	AG1	OK	8.03392	3.67981	-1.12647	3.05555	0.00224646	0.0207818	yes
XLOC_009956	XLOC_009956	Aard	15:51828050-51877264	FVA	AG1	OK	6.40549	2.54544	-1.33139	3.50818	0.000451187	0.00528861	yes
XLOC_009959	XLOC_009959	Nov	15:54577060-54588480	FVA	AG1	OK	0.625899	20.4547	5.03036	-23.0414	0	0	yes
XLOC_009961	XLOC_009961	Deptor	15:55043740-55090807	FVA	AG1	OK	4.71814	1.06953	-2.14124	5.89082	3.84287e-09	1.19454e-07	yes
XLOC_009964	XLOC_009964	Zhx2	15:57526162-57671388	FVA	AG1	OK	4.3949	7.39105	0.74995	-4.31091	1.62582e-05	0.000273459	yes
XLOC_009980	XLOC_009980	Efr3a	15:65618606-65705756	FVA	AG1	OK	20.6998	29.8825	0.529681	-3.54731	0.000389185	0.00465005	yes
XLOC_009982	XLOC_009982	Phf20l1	15:66409322-66479519	FVA	AG1	OK	10.6235	15.8478	0.577026	-3.29973	0.000967787	0.0102442	yes
XLOC_009984	XLOC_009984	Khdrbs3	15:68759116-68932058	FVA	AG1	OK	6.64383	25.2753	1.92764	-3.01309	0.00258599	0.0232273	yes
XLOC_009989	XLOC_009989	Gm6569	15:73670307-73670745	FVA	AG1	OK	0.370753	1.01022	1.44615	-4.86426	1.14886e-06	2.40335e-05	yes
XLOC_009992	XLOC_009992	Ly6e	15:74785363-74790334	FVA	AG1	OK	41.4582	78.0161	0.912116	-5.41018	6.29618e-08	1.6403e-06	yes
XLOC_009996	XLOC_009996	SNORA17	15:75584861-75593194	FVA	AG1	OK	0.632471	1.13192	0.839698	-3.77184	0.000162048	0.00216284	yes
XLOC_010009	XLOC_010009	-	15:76186313-76195482	FVA	AG1	OK	1.40036	3.78071	1.43286	-5.98606	2.14982e-09	6.94097e-08	yes
XLOC_010013	XLOC_010013	Scrt1	15:76344517-76361004	FVA	AG1	OK	17.2618	9.8152	-0.814498	4.89059	1.00534e-06	2.13053e-05	yes
XLOC_010016	XLOC_010016	Kifc2	15:76488332-76498648	FVA	AG1	OK	105.548	151.597	0.522333	-3.63118	0.000282134	0.00352359	yes
XLOC_010022	XLOC_010022	Mb	15:76844406-76846872	FVA	AG1	OK	1.2085	0.121683	-3.31202	4.17508	2.97883e-05	0.000475412	yes
XLOC_010023	XLOC_010023	Mb	15:76850078-76854063	FVA	AG1	OK	2.10371	0.125332	-4.06911	4.26558	1.99386e-05	0.000329094	yes
XLOC_010031	XLOC_010031	Cyth4	15:78427533-78452446	FVA	AG1	OK	4.19051	7.1032	0.761344	-3.10884	0.00187826	0.017939	yes
XLOC_010033	XLOC_010033	Cdc42ep1	15:78673083-78681465	FVA	AG1	OK	10.7039	6.20206	-0.787324	4.76654	1.87412e-06	3.78722e-05	yes
XLOC_010057	XLOC_010057	Cacna1i	15:80118083-80228835	FVA	AG1	OK	6.67951	11.3134	0.760214	-4.50921	6.5071e-06	0.000118968	yes
XLOC_010061	XLOC_010061	Mchr1	15:81065808-81069448	FVA	AG1	OK	2.93921	6.33751	1.10849	-5.33867	9.36322e-08	2.36167e-06	yes
XLOC_010076	XLOC_010076	1500009C09Rik	15:82086351-82091276	FVA	AG1	OK	53.9814	39.8558	-0.437673	3.33047	0.000866996	0.00934698	yes
XLOC_010077	XLOC_010077	2003-09-01	15:82102378-82125850	FVA	AG1	OK	62.1547	120.916	0.96007	-7.26662	3.68594e-13	1.78508e-11	yes
XLOC_010083	XLOC_010083	Mpped1	15:83610491-83689006	FVA	AG1	OK	8.98956	78.1883	3.12063	-10.3311	0	0	yes
XLOC_010087	XLOC_010087	Parvg	15:84154781-84173642	FVA	AG1	OK	1.48422	4.27384	1.52583	-5.18611	2.14736e-07	5.15134e-06	yes
XLOC_010095	XLOC_010095	-	15:85476569-85483720	FVA	AG1	OK	0.253914	0.87705	1.78832	-5.5782	2.4302e-08	6.74204e-07	yes
XLOC_010096	XLOC_010096	Mirlet7c-2	15:85505777-85537955	FVA	AG1	OK	2.57685	4.57576	0.8284	-2.82234	0.00476742	0.0381517	yes
XLOC_010102	XLOC_010102	Tbc1d22a	15:86043241-86328935	FVA	AG1	OK	5.87205	7.91917	0.431486	-2.79131	0.00524951	0.0413774	yes
XLOC_010131	XLOC_010131	Tmem117	15:94459704-94926525	FVA	AG1	OK	4.6088	1.96577	-1.2293	5.77755	7.57975e-09	2.26279e-07	yes
XLOC_010141	XLOC_010141	AI836003	15:97998225-98000603	FVA	AG1	OK	15.1764	5.70698	-1.41103	8.56437	0	0	yes
XLOC_010144	XLOC_010144	Cacnb3	15:98462305-98475034	FVA	AG1	OK	43.2047	76.9767	0.833233	-5.63788	1.72161e-08	4.88469e-07	yes
XLOC_010147	XLOC_010147	B130046B21Rik	15:98634152-98640825	FVA	AG1	OK	45.6724	458.881	3.32873	-20.1052	0	0	yes
XLOC_010149	XLOC_010149	Prph	15:98886165-98889399	FVA	AG1	OK	2.31545	0.950212	-1.28497	3.48057	0.000500349	0.00579134	yes
XLOC_010151	XLOC_010151	Kcnh3	15:99055310-99082564	FVA	AG1	OK	2.44626	22.7144	3.21496	-11.6267	0	0	yes
XLOC_010156	XLOC_010156	Gpd1	15:99545323-99560004	FVA	AG1	OK	9.23168	20.5709	1.15594	-8.78964	0	0	yes
XLOC_010161	XLOC_010161	Letmd1	15:100297718-100309672	FVA	AG1	OK	13.2671	20.9421	0.658556	-3.58075	0.000342613	0.00417431	yes
XLOC_010167	XLOC_010167	Grasp	15:101049968-101065721	FVA	AG1	OK	1.1844	7.7975	2.71886	-10.5524	0	0	yes
XLOC_010168	XLOC_010168	Nr4a1	15:101084758-101105227	FVA	AG1	OK	9.69671	32.1918	1.73113	-5.31889	1.04402e-07	2.61412e-06	yes
XLOC_010169	XLOC_010169	9430023L20Rik	15:101114711-101121453	FVA	AG1	OK	12.6583	19.5334	0.625856	-3.57617	0.000348666	0.00423137	yes
XLOC_010173	XLOC_010173	Igfbp6	15:101973922-101979941	FVA	AG1	OK	0.77403	3.44678	2.15479	-7.05132	1.77236e-12	8.07705e-11	yes
XLOC_010180	XLOC_010180	Prr13	15:102289576-102293243	FVA	AG1	OK	40.9639	28.8732	-0.504622	3.24498	0.00117458	0.0121745	yes
XLOC_010185	XLOC_010185	Hnrnpa1	15:103072246-103089688	FVA	AG1	OK	34.2745	46.7145	0.446734	-3.36646	0.000761393	0.00831879	yes
XLOC_010196	XLOC_010196	Lifr	15:7079657-7147475	FVA	AG1	OK	0.251343	5.11485	4.34696	-3.3146	0.000917753	0.00979169	yes
XLOC_010203	XLOC_010203	Slc1a3	15:8584045-8660928	FVA	AG1	OK	49.7661	74.9227	0.590238	-4.53294	5.81685e-06	0.000107494	yes
XLOC_010207	XLOC_010207	-	15:10349183-10355490	FVA	AG1	OK	0.44977	1.05839	1.23461	-4.62101	3.81883e-06	7.30244e-05	yes
XLOC_010217	XLOC_010217	6030458C11Rik	15:12735937-12754382	FVA	AG1	OK	4.4421	7.02897	0.662072	-4.02906	5.60007e-05	0.00084241	yes
XLOC_010218	XLOC_010218	Cdh6	15:12958465-13103441	FVA	AG1	OK	3.90103	1.22207	-1.67452	8.49615	0	0	yes
XLOC_010220	XLOC_010220	Gm2824	15:24929200-24957338	FVA	AG1	OK	0.612966	1.40401	1.19567	-3.73162	0.000190251	0.00249931	yes
XLOC_010221	XLOC_010221	Basp1	15:25292993-25343553	FVA	AG1	OK	97.7487	174.257	0.834067	-6.76708	1.31408e-11	5.45733e-10	yes
XLOC_010222	XLOC_010222	Fbxl7	15:26470226-26824958	FVA	AG1	OK	0.218549	0.830573	1.92615	-5.37647	7.59588e-08	1.95744e-06	yes
XLOC_010225	XLOC_010225	Fam105a	15:27584852-27611218	FVA	AG1	OK	3.04922	6.90667	1.17955	-4.8916	1.00018e-06	2.1225e-05	yes
XLOC_010226	XLOC_010226	Trio	15:27660403-27955167	FVA	AG1	OK	1.19096	0.36427	-1.70905	4.76322	1.90528e-06	3.84516e-05	yes
XLOC_010227	XLOC_010227	Ankrd33b	15:31220418-31297830	FVA	AG1	OK	0.726163	9.55864	3.71844	-13.2233	0	0	yes
XLOC_010236	XLOC_010236	Nipal2	15:34502582-34608480	FVA	AG1	OK	4.44683	1.34421	-1.72602	8.37569	0	0	yes
XLOC_010237	XLOC_010237	-	15:34674734-34679053	FVA	AG1	OK	0.477258	0.90911	0.929686	-2.7745	0.00552862	0.0431699	yes
XLOC_010242	XLOC_010242	Rnf19a	15:36194932-36212921	FVA	AG1	OK	6.59064	11.7922	0.839345	-5.29755	1.17368e-07	2.91513e-06	yes
XLOC_010243	XLOC_010243	Ankrd46	15:36407175-36426647	FVA	AG1	OK	55.479	83.456	0.589074	-4.06521	4.79886e-05	0.00073331	yes
XLOC_010244	XLOC_010244	Snx31	15:36453206-36485307	FVA	AG1	OK	1.07479	0	-1.79769e+308	-1.79769e+308	0.00304935	0.0265256	yes
XLOC_010245	XLOC_010245	Pabpc1	15:36526656-36531219	FVA	AG1	OK	11.6258	20.4967	0.818061	-3.08654	0.00202502	0.0190993	yes
XLOC_010252	XLOC_010252	Klf10	15:38224168-38230487	FVA	AG1	OK	1.70519	8.10055	2.24808	-7.27292	3.51719e-13	1.70871e-11	yes
XLOC_010257	XLOC_010257	Rspo2	15:42852254-43002761	FVA	AG1	OK	0.328134	6.01521	4.19626	-8.34767	0	0	yes
XLOC_010262	XLOC_010262	Kcnv1	15:44936986-44947478	FVA	AG1	OK	0.86473	6.57945	2.92764	-9.34205	0	0	yes
XLOC_010263	XLOC_010263	Csmd3	15:47412197-48623758	FVA	AG1	OK	3.45283	2.08638	-0.726774	3.83409	0.00012603	0.00172228	yes
XLOC_010267	XLOC_010267	Ext1	15:52895589-53177556	FVA	AG1	OK	1.8279	3.98008	1.12261	-6.45967	1.04934e-10	3.94435e-09	yes
XLOC_010273	XLOC_010273	Sntb1	15:55467942-55738555	FVA	AG1	OK	3.03429	1.54749	-0.971428	4.98967	6.04833e-07	1.33582e-05	yes
XLOC_010280	XLOC_010280	Tmem65	15:58611974-58654613	FVA	AG1	OK	15.3576	11.9318	-0.36414	2.74059	0.00613288	0.0469858	yes
XLOC_010290	XLOC_010290	Adcy8	15:64530584-64753953	FVA	AG1	OK	11.0485	4.01276	-1.46119	9.34254	0	0	yes
XLOC_010294	XLOC_010294	Sla	15:66612401-66644359	FVA	AG1	OK	0.776651	2.048	1.39887	-5.03036	4.89547e-07	1.0945e-05	yes
XLOC_010295	XLOC_010295	Ndrg1	15:66760791-66801314	FVA	AG1	OK	60.384	40.1018	-0.590499	4.75891	1.94637e-06	3.92551e-05	yes
XLOC_010296	XLOC_010296	St3gal1	15:66934378-67008456	FVA	AG1	OK	4.54875	9.41248	1.04911	-5.44318	5.23391e-08	1.37984e-06	yes
XLOC_010298	XLOC_010298	Fam135b	15:71269179-71558753	FVA	AG1	OK	3.93451	8.62624	1.13255	-6.90996	4.84768e-12	2.12761e-10	yes
XLOC_010299	XLOC_010299	Col22a1	15:71628826-71646429	FVA	AG1	OK	0.24694	1.03743	2.07078	-2.7511	0.00593947	0.045718	yes
XLOC_010302	XLOC_010302	Trappc9	15:72515711-72891670	FVA	AG1	OK	69.2278	45.8917	-0.593118	4.27713	1.89319e-05	0.000313987	yes
XLOC_010303	XLOC_010303	Eif2c2	15:72926272-72951889	FVA	AG1	OK	10.2302	4.60215	-1.15246	2.81214	0.00492131	0.0392106	yes
XLOC_010304	XLOC_010304	Ptk2	15:73035534-73253523	FVA	AG1	OK	21.9358	31.3402	0.514724	-3.46949	0.000521452	0.00598953	yes
XLOC_010310	XLOC_010310	Arc	15:74499510-74503081	FVA	AG1	OK	9.29552	52.3029	2.49228	-15.9354	0	0	yes
XLOC_010326	XLOC_010326	Nrbp2	15:75915884-75921987	FVA	AG1	OK	82.8696	53.8717	-0.621316	5.04938	4.43253e-07	9.98671e-06	yes
XLOC_010327	XLOC_010327	BC024139	15:75949975-75955079	FVA	AG1	OK	1.46417	0.424799	-1.78523	3.22484	0.00126042	0.0129298	yes
XLOC_010340	XLOC_010340	Zfp251	15:76681581-76701908	FVA	AG1	OK	7.54897	12.8768	0.770418	-4.20305	2.63345e-05	0.000423794	yes
XLOC_010343	XLOC_010343	Mb	15:76847931-76849976	FVA	AG1	OK	0.893148	0.0805407	-3.47111	4.62568	3.73379e-06	7.1523e-05	yes
XLOC_010345	XLOC_010345	Gm6506	15:77274547-77274764	FVA	AG1	OK	27.1433	1.55094	-4.12938	2.87061	0.0040968	0.0336657	yes
XLOC_010347	XLOC_010347	Myh9	15:77591015-77672612	FVA	AG1	OK	12.1039	20.6157	0.768275	-5.04184	4.61078e-07	1.0346e-05	yes
XLOC_010353	XLOC_010353	Pvalb	15:78021444-78034894	FVA	AG1	OK	51.6744	18.8912	-1.45174	9.83178	0	0	yes
XLOC_010357	XLOC_010357	C1qtnf6	15:78353792-78360074	FVA	AG1	OK	0.486555	1.12666	1.21138	-3.39852	0.000677516	0.00753288	yes
XLOC_010361	XLOC_010361	Elfn2	15:78497695-78549258	FVA	AG1	OK	16.1793	33.7371	1.06018	-6.56738	5.12066e-11	2.00784e-09	yes
XLOC_010369	XLOC_010369	Sox10	15:78985215-78994949	FVA	AG1	OK	21.6529	15.6267	-0.470552	3.38524	0.000711155	0.0078364	yes
XLOC_010375	XLOC_010375	Kcnj4	15:79310654-79342191	FVA	AG1	OK	2.05698	12.2658	2.57605	-11.0966	0	0	yes
XLOC_010381	XLOC_010381	Sun2	15:79554502-79572840	FVA	AG1	OK	12.4413	7.64785	-0.702016	3.55686	0.000375319	0.00450353	yes
XLOC_010382	XLOC_010382	Dnalc4	15:79591849-79604904	FVA	AG1	OK	16.3613	26.7002	0.706561	-4.36157	1.29133e-05	0.000221663	yes
XLOC_010383	XLOC_010383	Cbx6	15:79654299-79664734	FVA	AG1	OK	64.5354	201.221	1.64062	-12.8552	0	0	yes
XLOC_010385	XLOC_010385	Pdgfb	15:79826311-79873144	FVA	AG1	OK	8.81299	15.74	0.836728	-4.22062	2.43628e-05	0.000395359	yes
XLOC_010388	XLOC_010388	Mkl1	15:80807955-81021177	FVA	AG1	OK	3.4117	8.01265	1.23179	-6.35948	2.02435e-10	7.38468e-09	yes
XLOC_010399	XLOC_010399	Pmm1	15:81766933-81791295	FVA	AG1	OK	64.4978	48.5351	-0.410221	2.90084	0.00372164	0.0313094	yes
XLOC_010421	XLOC_010421	Scube1	15:83432925-83555404	FVA	AG1	OK	8.48333	5.21578	-0.701749	4.34863	1.3699e-05	0.000233464	yes
XLOC_010424	XLOC_010424	1810041L15Rik	15:84209546-84277454	FVA	AG1	OK	36.2546	13.7323	-1.40059	9.9399	0	0	yes
XLOC_010426	XLOC_010426	Ldoc1l	15:84383808-84388285	FVA	AG1	OK	12.1331	15.7187	0.373525	-2.72674	0.00639628	0.0485583	yes
XLOC_010429	XLOC_010429	5031439G07Rik	15:84774385-84818179	FVA	AG1	OK	36.7388	26.0086	-0.498313	3.5046	0.000457289	0.00535201	yes
XLOC_010430	XLOC_010430	Wnt7b	15:85365864-85424078	FVA	AG1	OK	6.91853	16.3517	1.2409	-3.39156	0.000694952	0.00769077	yes
XLOC_010434	XLOC_010434	Celsr1	15:85709736-85752760	FVA	AG1	OK	0.45376	1.13462	1.32221	-3.90466	9.43591e-05	0.00133189	yes
XLOC_010435	XLOC_010435	Cerk	15:85969490-86016076	FVA	AG1	OK	22.2953	15.5316	-0.521529	3.1219	0.00179688	0.0173122	yes
XLOC_010446	XLOC_010446	Sbf1	15:89042085-89145706	FVA	AG1	OK	24.7838	38.2791	0.627159	-3.04565	0.00232178	0.021338	yes
XLOC_010449	XLOC_010449	Odf3b	15:89207555-89209766	FVA	AG1	OK	4.64041	1.42219	-1.70613	3.66136	0.000250884	0.00319794	yes
XLOC_010454	XLOC_010454	Syt10	15:89607385-89672343	FVA	AG1	OK	3.69913	2.40328	-0.622184	3.26521	0.00109384	0.011422	yes
XLOC_010455	XLOC_010455	Cpne8	15:90415306-90509860	FVA	AG1	OK	2.38167	6.49032	1.44632	-4.6982	2.62466e-06	5.1687e-05	yes
XLOC_010466	XLOC_010466	Nell2	15:95044643-95359199	FVA	AG1	OK	45.6824	98.5067	1.10858	-6.73661	1.6213e-11	6.6972e-10	yes
XLOC_010469	XLOC_010469	-	15:95566875-95603098	FVA	AG1	OK	0.488214	3.01049	2.62441	-2.74355	0.00607784	0.0465988	yes
XLOC_010470	XLOC_010470	-	15:95566875-95603098	FVA	AG1	OK	0.151132	0.866961	2.52015	-3.50821	0.00045113	0.00528861	yes
XLOC_010474	XLOC_010474	Scaf11	15:96242044-96247796	FVA	AG1	OK	10.7738	7.84454	-0.457766	2.96721	0.00300518	0.0262004	yes
XLOC_010475	XLOC_010475	Slc38a1	15:96401763-96473830	FVA	AG1	OK	45.2682	24.5912	-0.880352	6.74016	1.58209e-11	6.55274e-10	yes
XLOC_010478	XLOC_010478	Amigo2	15:97074307-97237382	FVA	AG1	OK	14.8293	7.537	-0.976389	5.35483	8.56361e-08	2.17956e-06	yes
XLOC_010480	XLOC_010480	Endou	15:97541447-97561904	FVA	AG1	OK	5.32426	0.150732	-5.14252	6.34448	2.2318e-10	8.09368e-09	yes
XLOC_010483	XLOC_010483	Col2a1	15:97819387-97824489	FVA	AG1	OK	1.73759	0.524308	-1.7286	4.47682	7.57616e-06	0.000136495	yes
XLOC_010492	XLOC_010492	Rnd1	15:98500221-98507892	FVA	AG1	OK	12.7536	4.69497	-1.44172	7.47585	7.66054e-14	3.91232e-12	yes
XLOC_010494	XLOC_010494	Arf3	15:98566671-98593806	FVA	AG1	OK	108.482	261.596	1.26989	-9.59951	0	0	yes
XLOC_010499	XLOC_010499	Tuba1a	15:98763082-98784189	FVA	AG1	OK	757.926	535.097	-0.502258	3.43732	0.000587501	0.00665907	yes
XLOC_010500	XLOC_010500	C1ql4	15:98914531-98917945	FVA	AG1	OK	1.43837	0	-1.79769e+308	-1.79769e+308	9.09381e-08	2.29935e-06	yes
XLOC_010522	XLOC_010522	Galnt6	15:100521965-100559793	FVA	AG1	OK	7.74849	3.70773	-1.06338	5.03381	4.80826e-07	1.07734e-05	yes
XLOC_010524	XLOC_010524	A330009N23Rik	15:101049968-101065721	FVA	AG1	OK	0.657446	2.88943	2.13584	-5.06645	4.05299e-07	9.20126e-06	yes
XLOC_010527	XLOC_010527	Krt77	15:101523588-101828951	FVA	AG1	OK	1.66219	3.93553	1.24347	-3.12681	0.00176711	0.0171	yes
XLOC_010537	XLOC_010537	Calcoco1	15:102536328-102552630	FVA	AG1	OK	17.1799	23.7225	0.46553	-2.80363	0.00505309	0.0400951	yes
XLOC_010542	XLOC_010542	Zfp385a	15:103144319-103170587	FVA	AG1	OK	31.2152	16.4656	-0.922789	5.41172	6.24239e-08	1.62766e-06	yes
XLOC_010544	XLOC_010544	Ppp1r1a	15:103333635-103368421	FVA	AG1	OK	8.94212	18.7382	1.06729	-2.92931	0.00339718	0.0289801	yes
XLOC_010549	XLOC_010549	-	15:4784581-4784734	FVA	AG1	OK	29.5467	0	-1.79769e+308	-1.79769e+308	0.00220337	0.0204505	yes
XLOC_010553	XLOC_010553	Ptger4	15:5177067-5180125	FVA	AG1	OK	1.64009	2.9998	0.871091	-3.82704	0.000129692	0.00176608	yes
XLOC_010614	XLOC_010614	-	15:27958200-27959998	FVA	AG1	OK	1.3139	0.271729	-2.27361	4.76789	1.86167e-06	3.76699e-05	yes
XLOC_010616	XLOC_010616	-	15:27961998-27962867	FVA	AG1	OK	0.889552	0.102632	-3.11559	2.82346	0.00475087	0.038039	yes
XLOC_010684	XLOC_010684	-	15:39025290-39028956	FVA	AG1	OK	2.6101	1.4743	-0.824074	3.78731	0.000152284	0.00204399	yes
XLOC_010688	XLOC_010688	Zfpm2	15:40486615-40937540	FVA	AG1	OK	0.106699	1.43532	3.74975	-3.15046	0.00163016	0.0159344	yes
XLOC_010698	XLOC_010698	Ttc35	15:43331420-43333263	FVA	AG1	OK	0.3779	0.0719809	-2.39232	2.75129	0.00593612	0.045705	yes
XLOC_010701	XLOC_010701	-	15:43565700-43566567	FVA	AG1	OK	0.105776	0.892048	3.07611	-2.78147	0.00541138	0.042426	yes
XLOC_010702	XLOC_010702	-	15:43566837-43570956	FVA	AG1	OK	0.192602	0.976344	2.34176	-6.12061	9.32183e-10	3.14439e-08	yes
XLOC_010720	XLOC_010720	-	15:44739714-44740720	FVA	AG1	OK	0.729087	0.0955946	-2.93109	2.79463	0.00519597	0.0410182	yes
XLOC_010721	XLOC_010721	-	15:44927672-44929907	FVA	AG1	OK	0.0704123	0.69713	3.30753	-4.30184	1.69388e-05	0.000283826	yes
XLOC_010722	XLOC_010722	-	15:44930185-44932209	FVA	AG1	OK	0.0427075	0.362506	3.08544	-2.93808	0.00330254	0.0283607	yes
XLOC_010750	XLOC_010750	Pvt1	15:62093843-62098930	FVA	AG1	OK	0.985061	1.96332	0.99501	-4.43511	9.20247e-06	0.000163131	yes
XLOC_010777	XLOC_010777	-	15:69894473-69894890	FVA	AG1	OK	52.6681	33.5148	-0.652131	3.21915	0.00128572	0.0131388	yes
XLOC_010791	XLOC_010791	-	15:73030734-73033352	FVA	AG1	OK	0.16225	0.520803	1.68252	-3.32773	0.000875571	0.00941642	yes
XLOC_010800	XLOC_010800	Gm628	15:73668256-73669816	FVA	AG1	OK	0.320525	0.917717	1.51761	-3.10338	0.00191322	0.0181997	yes
XLOC_010811	XLOC_010811	-	15:74741768-74741898	FVA	AG1	OK	22.6006	142.473	2.65626	-3.16275	0.00156286	0.0153885	yes
XLOC_010816	XLOC_010816	Mafa	15:75575922-75577132	FVA	AG1	OK	0.3451	1.4088	2.02938	-3.87713	0.000105695	0.00147906	yes
XLOC_010831	XLOC_010831	-	15:75782794-75785134	FVA	AG1	OK	0.354363	1.50619	2.08761	-5.55546	2.76881e-08	7.61126e-07	yes
XLOC_010832	XLOC_010832	-	15:75785221-75787237	FVA	AG1	OK	0.321117	1.50212	2.22583	-5.27105	1.35645e-07	3.33426e-06	yes
XLOC_010861	XLOC_010861	Mb	15:76847006-76847319	FVA	AG1	OK	2.54862	0	-1.79769e+308	-1.79769e+308	0.00282264	0.0249897	yes
XLOC_010862	XLOC_010862	Mb	15:76847485-76847826	FVA	AG1	OK	2.86612	0	-1.79769e+308	-1.79769e+308	0.000652984	0.00730482	yes
XLOC_010864	XLOC_010864	Mb	15:76854234-76857181	FVA	AG1	OK	1.19971	0.0685081	-4.13027	6.25306	4.02498e-10	1.41323e-08	yes
XLOC_010969	XLOC_010969	2003-09-01	15:82125901-82126758	FVA	AG1	OK	0.341282	1.97936	2.536	-3.98747	6.67808e-05	0.000976523	yes
XLOC_010977	XLOC_010977	-	15:82823839-82824947	FVA	AG1	OK	0.92008	0.191985	-2.26076	3.10504	0.0019025	0.0181207	yes
XLOC_010979	XLOC_010979	Nfam1	15:82825641-82827010	FVA	AG1	OK	0.740904	0.064378	-3.52465	3.38415	0.000713988	0.00786201	yes
XLOC_010992	XLOC_010992	-	15:84181103-84182846	FVA	AG1	OK	0.128128	0.712337	2.47497	-3.65757	0.000254614	0.00323216	yes
XLOC_010993	XLOC_010993	-	15:84183013-84184555	FVA	AG1	OK	0.204445	1.01587	2.31293	-3.9788	6.92635e-05	0.001009	yes
XLOC_011002	XLOC_011002	-	15:84303325-84305731	FVA	AG1	OK	0.0384702	0.473024	3.6201	-3.65637	0.000255814	0.00324472	yes
XLOC_011004	XLOC_011004	-	15:84307198-84308671	FVA	AG1	OK	0.0382806	0.788304	4.36407	-3.38757	0.00070514	0.007784	yes
XLOC_011006	XLOC_011006	-	15:84308774-84313271	FVA	AG1	OK	0	0.40247	1.79769e+308	1.79769e+308	0.00450137	0.0364321	yes
XLOC_011032	XLOC_011032	Ttll8	15:88750559-88753534	FVA	AG1	OK	0.806605	0.395688	-1.0275	2.92205	0.00347731	0.0295707	yes
XLOC_011077	XLOC_011077	Gxylt1	15:93085116-93088807	FVA	AG1	OK	0.66639	0.0850659	-2.96971	5.39411	6.88654e-08	1.78357e-06	yes
XLOC_011091	XLOC_011091	-	15:93787157-93787893	FVA	AG1	OK	0.770096	0	-1.79769e+308	-1.79769e+308	0.000461529	0.00539142	yes
XLOC_011101	XLOC_011101	-	15:95513729-95517793	FVA	AG1	OK	0.132739	0.968452	2.86709	-6.60198	4.05707e-11	1.61125e-09	yes
XLOC_011108	XLOC_011108	-	15:95529113-95530171	FVA	AG1	OK	0.0837276	0.670918	3.00236	-2.73393	0.00625839	0.0477225	yes
XLOC_011109	XLOC_011109	-	15:95530481-95531814	FVA	AG1	OK	0.0504233	0.629858	3.64287	-3.018	0.00254451	0.022908	yes
XLOC_011169	XLOC_011169	-	15:98825440-98827063	FVA	AG1	OK	0.610204	1.44735	1.24605	-3.3033	0.000955534	0.0101457	yes
XLOC_011170	XLOC_011170	-	15:98827198-98829017	FVA	AG1	OK	0.156043	0.697043	2.15931	-3.54446	0.000393414	0.00469592	yes
XLOC_011171	XLOC_011171	-	15:98918361-98918791	FVA	AG1	OK	1.85557	0	-1.79769e+308	-1.79769e+308	0.000400606	0.00476441	yes
XLOC_011179	XLOC_011179	-	15:99289570-99291232	FVA	AG1	OK	0.696777	0.141561	-2.29927	3.43519	0.000592145	0.00669941	yes
XLOC_011180	XLOC_011180	-	15:99291471-99292768	FVA	AG1	OK	0.786528	0.19194	-2.03484	3.01978	0.00252958	0.0228134	yes
XLOC_011181	XLOC_011181	-	15:99292916-99295302	FVA	AG1	OK	0.938193	0.474241	-0.984264	2.73776	0.0061859	0.0473099	yes
XLOC_011217	XLOC_011217	-	15:100699059-100700998	FVA	AG1	OK	0.374645	1.17771	1.65239	-3.98911	6.63231e-05	0.000972591	yes
XLOC_011229	XLOC_011229	-	15:101141878-101143885	FVA	AG1	OK	0.0450484	0.666446	3.88694	-3.86782	0.000109812	0.00152561	yes
XLOC_011231	XLOC_011231	-	15:101145197-101146644	FVA	AG1	OK	0.0692478	0.622938	3.16925	-3.18491	0.00144801	0.0144932	yes
XLOC_011250	XLOC_011250	-	15:102994223-102994817	FVA	AG1	OK	0.91847	0	-1.79769e+308	-1.79769e+308	0.00106038	0.011095	yes
XLOC_011251	XLOC_011251	-	15:102994924-102995112	FVA	AG1	OK	10.5251	0	-1.79769e+308	-1.79769e+308	0.00566216	0.0440235	yes
XLOC_011268	XLOC_011268	Rogdi	16:5008721-5013710	FVA	AG1	OK	2.40001	6.40128	1.41532	-3.57863	0.000345395	0.00419993	yes
XLOC_011270	XLOC_011270	Sec14l5	16:5147039-5187355	FVA	AG1	OK	15.805	8.10102	-0.964206	5.90294	3.57086e-09	1.11447e-07	yes
XLOC_011274	XLOC_011274	Rbfox1	16:7039469-7412614	FVA	AG1	OK	5.08641	18.1713	1.83695	-2.8027	0.00506767	0.0401902	yes
XLOC_011277	XLOC_011277	Abat	16:8513492-8622553	FVA	AG1	OK	75.8709	42.4116	-0.839088	6.82122	9.02678e-12	3.81024e-10	yes
XLOC_011282	XLOC_011282	-	16:8962005-8969453	FVA	AG1	OK	0.132823	0.869276	2.71031	-6.24128	4.34006e-10	1.50673e-08	yes
XLOC_011288	XLOC_011288	Snn	16:11066451-11134450	FVA	AG1	OK	13.6583	28.4899	1.06067	-5.35765	8.43092e-08	2.14933e-06	yes
XLOC_011290	XLOC_011290	Snx29	16:11323015-11757325	FVA	AG1	OK	9.92511	4.27753	-1.21431	4.4443	8.8178e-06	0.000156943	yes
XLOC_011293	XLOC_011293	Mkl2	16:13256364-13416349	FVA	AG1	OK	16.3184	38.9662	1.25573	-7.67711	1.62093e-14	8.78655e-13	yes
XLOC_011294	XLOC_011294	-	16:13463910-13467413	FVA	AG1	OK	2.23332	0.43559	-2.35815	3.29623	0.000979906	0.0103476	yes
XLOC_011307	XLOC_011307	Cebpd	16:15886495-15888642	FVA	AG1	OK	0.910805	3.22077	1.82219	-6.32738	2.49354e-10	8.94835e-09	yes
XLOC_011312	XLOC_011312	Mapk1	16:16983411-17049461	FVA	AG1	OK	35.8388	86.424	1.26991	-9.98786	0	0	yes
XLOC_011313	XLOC_011313	Ypel1	16:17070414-17111336	FVA	AG1	OK	0.826859	3.70007	2.16184	-4.7731	1.8141e-06	3.68278e-05	yes
XLOC_011318	XLOC_011318	Snap29	16:17406083-17430969	FVA	AG1	OK	5.79313	8.44976	0.544568	-3.31101	0.000929592	0.00990432	yes
XLOC_011321	XLOC_011321	Lztr1	16:17508553-17531608	FVA	AG1	OK	18.8877	26.2743	0.476202	-3.45294	0.000554516	0.00632697	yes
XLOC_011323	XLOC_011323	Smpd4	16:17619436-17645963	FVA	AG1	OK	9.21949	14.6113	0.664328	-4.50341	6.68707e-06	0.00012197	yes
XLOC_011329	XLOC_011329	Rtn4r	16:18127817-18152557	FVA	AG1	OK	15.0499	34.1786	1.18334	-5.31629	1.05905e-07	2.64959e-06	yes
XLOC_011345	XLOC_011345	Vwa5b2	16:20584616-20610840	FVA	AG1	OK	9.03466	5.36875	-0.750885	3.89963	9.63405e-05	0.00135429	yes
XLOC_011349	XLOC_011349	Fam131a	16:20693319-20716197	FVA	AG1	OK	3.16555	17.3605	2.45528	-12.6028	0	0	yes
XLOC_011351	XLOC_011351	Chrd	16:20724780-20742759	FVA	AG1	OK	4.89763	33.6454	2.78025	-11.8285	0	0	yes
XLOC_011353	XLOC_011353	Ephb3	16:21204664-21223440	FVA	AG1	OK	2.27952	5.29439	1.21573	-6.45844	1.05786e-10	3.96673e-09	yes
XLOC_011360	XLOC_011360	Dnajb11	16:22857901-22872591	FVA	AG1	OK	15.8541	22.1768	0.48419	-3.20261	0.00136189	0.0137605	yes
XLOC_011371	XLOC_011371	Hrasls	16:29209280-29230679	FVA	AG1	OK	8.70608	4.06219	-1.09977	5.37218	7.77887e-08	1.99794e-06	yes
XLOC_011373	XLOC_011373	4632428C04Rik	16:30020425-30021078	FVA	AG1	OK	1.03497	0.212332	-2.2852	3.01032	0.00260972	0.02342	yes
XLOC_011395	XLOC_011395	Slc12a8	16:33663660-33664320	FVA	AG1	OK	2.78151	0.296942	-3.22762	7.17235	7.37188e-13	3.48815e-11	yes
XLOC_011396	XLOC_011396	Heg1	16:33684898-33771807	FVA	AG1	OK	5.8915	3.19266	-0.883875	4.95129	7.3724e-07	1.59967e-05	yes
XLOC_011405	XLOC_011405	Kpna1	16:35983418-36039211	FVA	AG1	OK	14.4514	19.2231	0.411626	-3.24897	0.00115822	0.012009	yes
XLOC_011413	XLOC_011413	Lrrc58	16:37868792-37886152	FVA	AG1	OK	11.3865	17.2545	0.59964	-4.04645	5.19999e-05	0.000787208	yes
XLOC_011418	XLOC_011418	Cd80	16:38483772-38484627	FVA	AG1	OK	30.7377	20.03	-0.617846	3.38183	0.00072005	0.0079203	yes
XLOC_011421	XLOC_011421	Igsf11	16:38902577-39027268	FVA	AG1	OK	6.43211	9.99016	0.635215	-2.93396	0.00334665	0.0286525	yes
XLOC_011429	XLOC_011429	Naa50	16:44139941-44163566	FVA	AG1	OK	10.769	15.0467	0.482565	-2.71649	0.00659787	0.0498073	yes
XLOC_011447	XLOC_011447	Cblb	16:52031706-52208156	FVA	AG1	OK	3.13534	6.46761	1.04461	-5.16593	2.39244e-07	5.68628e-06	yes
XLOC_011458	XLOC_011458	Mina	16:59471611-59600685	FVA	AG1	OK	3.91989	6.60102	0.751876	-2.86072	0.00422687	0.034569	yes
XLOC_011464	XLOC_011464	Vgll3	16:65828218-65866609	FVA	AG1	OK	0.315306	1.06111	1.75075	-6.2481	4.15488e-10	1.45059e-08	yes
XLOC_011465	XLOC_011465	Gbe1	16:70314408-70569956	FVA	AG1	OK	6.98953	2.50754	-1.47892	5.95175	2.65287e-09	8.38981e-08	yes
XLOC_011469	XLOC_011469	Usp25	16:77014294-77117025	FVA	AG1	OK	5.71235	9.50573	0.734714	-3.2046	0.00135252	0.0136882	yes
XLOC_011476	XLOC_011476	Jam2	16:84821135-84826684	FVA	AG1	OK	11.1129	6.07124	-0.872171	4.44481	8.79703e-06	0.000156663	yes
XLOC_011484	XLOC_011484	-	16:87835891-87839532	FVA	AG1	OK	0.209728	1.17698	2.4885	-3.16488	0.00155147	0.0153203	yes
XLOC_011487	XLOC_011487	Hunk	16:90386719-90499875	FVA	AG1	OK	2.9375	6.76521	1.20355	-6.97932	2.96607e-12	1.32054e-10	yes
XLOC_011491	XLOC_011491	Olig1	16:91269822-91272229	FVA	AG1	OK	45.4294	34.4524	-0.399021	3.09292	0.00198196	0.018756	yes
XLOC_011495	XLOC_011495	Ifngr2	16:91547321-91564374	FVA	AG1	OK	10.7083	20.9937	0.97123	-6.15652	7.43619e-10	2.53882e-08	yes
XLOC_011496	XLOC_011496	Son	16:91648055-91680615	FVA	AG1	OK	39.3863	29.077	-0.437818	2.75895	0.0057987	0.0448481	yes
XLOC_011499	XLOC_011499	Kcne2	16:92292609-92298528	FVA	AG1	OK	0.227815	1.7917	2.9754	-6.13521	8.50449e-10	2.88127e-08	yes
XLOC_011503	XLOC_011503	Cbr3	16:93683418-93691215	FVA	AG1	OK	2.65016	6.42007	1.27651	-4.79089	1.66043e-06	3.39138e-05	yes
XLOC_011511	XLOC_011511	Ets2	16:95923570-95942657	FVA	AG1	OK	10.3099	17.225	0.740475	-5.22076	1.78186e-07	4.33512e-06	yes
XLOC_011512	XLOC_011512	Wrb	16:96366993-96379565	FVA	AG1	OK	22.3585	16.1622	-0.468195	2.95864	0.00308998	0.0268111	yes
XLOC_011513	XLOC_011513	Sh3bgr	16:96422076-96450507	FVA	AG1	OK	1.80473	0.84417	-1.09618	2.89388	0.00380514	0.0318707	yes
XLOC_011515	XLOC_011515	Pcp4	16:96689237-96758875	FVA	AG1	OK	690.7	125.365	-2.46193	10.5293	0	0	yes
XLOC_011516	XLOC_011516	Bace2	16:97659603-97660378	FVA	AG1	OK	1.69243	0.755153	-1.16426	3.95035	7.80377e-05	0.00111889	yes
XLOC_011525	XLOC_011525	Adcy9	16:4284764-4420171	FVA	AG1	OK	8.2163	21.22	1.36886	-8.74233	0	0	yes
XLOC_011527	XLOC_011527	Srl	16:4477027-4541817	FVA	AG1	OK	0.914074	1.61137	0.817903	-2.72072	0.00651397	0.0492823	yes
XLOC_011533	XLOC_011533	Fam100a	16:4871394-4880573	FVA	AG1	OK	10.4071	15.7646	0.599125	-4.43377	9.25976e-06	0.000164053	yes
XLOC_011535	XLOC_011535	Rogdi	16:5008721-5013710	FVA	AG1	OK	84.6723	149.876	0.823809	-4.94677	7.54548e-07	1.63378e-05	yes
XLOC_011541	XLOC_011541	Cldn26	16:8409255-8425237	FVA	AG1	OK	0.846833	2.07488	1.29288	-3.57653	0.000348182	0.00422716	yes
XLOC_011546	XLOC_011546	Emp2	16:10281808-10314027	FVA	AG1	OK	5.69861	8.11595	0.51015	-3.04779	0.00230531	0.0212119	yes
XLOC_011547	XLOC_011547	Tekt5	16:10358041-10395433	FVA	AG1	OK	6.73791	3.33703	-1.01374	4.56639	4.96206e-06	9.30326e-05	yes
XLOC_011551	XLOC_011551	Prm1	16:10796954-10800239	FVA	AG1	OK	0.961719	0.333722	-1.52697	4.43068	9.39376e-06	0.000166332	yes
XLOC_011552	XLOC_011552	Litaf	16:10959333-10993192	FVA	AG1	OK	17.9868	10.8131	-0.734156	3.28614	0.00101571	0.0106747	yes
XLOC_011562	XLOC_011562	Ifitm7	16:13983173-13984269	FVA	AG1	OK	0.958027	0.277744	-1.78631	2.82069	0.004792	0.0383187	yes
XLOC_011583	XLOC_011583	4930451C15Rik	16:17544722-17561316	FVA	AG1	OK	3.50987	1.09408	-1.6817	2.79616	0.00517141	0.0408451	yes
XLOC_011584	XLOC_011584	Slc7a4	16:17568687-17576890	FVA	AG1	OK	4.74148	11.7815	1.31311	-4.97587	6.49554e-07	1.42643e-05	yes
XLOC_011597	XLOC_011597	2005-09-01	16:18621150-18629988	FVA	AG1	OK	2.29853	5.04541	1.13426	-3.2136	0.00131083	0.0133318	yes
XLOC_011609	XLOC_011609	Camk2n2	16:20611607-20621476	FVA	AG1	OK	40.5465	15.7221	-1.36678	9.6791	0	0	yes
XLOC_011610	XLOC_011610	Clcn2	16:20693319-20716197	FVA	AG1	OK	6.36952	21.5248	1.75675	-12.1496	0	0	yes
XLOC_011611	XLOC_011611	Thpo	16:20724780-20742759	FVA	AG1	OK	1.94596	8.81027	2.17871	-7.86694	3.55271e-15	2.05951e-13	yes
XLOC_011615	XLOC_011615	Tmem41a	16:21934127-21947603	FVA	AG1	OK	13.7509	6.95533	-0.983338	4.3206	1.55603e-05	0.000262867	yes
XLOC_011618	XLOC_011618	Dgkg	16:22450624-22657401	FVA	AG1	OK	8.89882	35.1443	1.98161	-14.7852	0	0	yes
XLOC_011620	XLOC_011620	Gm6493	16:23016821-23017196	FVA	AG1	OK	4.49128	1.69079	-1.40943	6.30713	2.84252e-10	1.01068e-08	yes
XLOC_011626	XLOC_011626	Sst	16:23889528-23892900	FVA	AG1	OK	42.58	159.005	1.90082	-13.2637	0	0	yes
XLOC_011627	XLOC_011627	Bcl6	16:23965134-23988820	FVA	AG1	OK	5.57478	15.8486	1.50736	-9.34623	0	0	yes
XLOC_011631	XLOC_011631	Gm606	16:26957328-26968277	FVA	AG1	OK	0.244662	1.11351	2.18625	-3.7403	0.0001838	0.00243006	yes
XLOC_011632	XLOC_011632	Fgf12	16:28156724-28564846	FVA	AG1	OK	20.1348	11.6804	-0.785605	5.96049	2.51486e-09	8.01073e-08	yes
XLOC_011633	XLOC_011633	-	16:28752919-28753414	FVA	AG1	OK	74.8821	35.8686	-1.0619	4.79241	1.64788e-06	3.36971e-05	yes
XLOC_011634	XLOC_011634	1600021P15Rik	16:28826262-28929871	FVA	AG1	OK	20.0226	6.83033	-1.5516	10.5477	0	0	yes
XLOC_011636	XLOC_011636	Atp13a4	16:29396062-29541711	FVA	AG1	OK	7.34658	3.86475	-0.926696	4.05489	5.01588e-05	0.000763075	yes
XLOC_011639	XLOC_011639	Tmem44	16:30510198-30550636	FVA	AG1	OK	7.57822	13.8996	0.875109	-3.03009	0.00244484	0.0222113	yes
XLOC_011642	XLOC_011642	Acap2	16:31092500-31105994	FVA	AG1	OK	8.96443	5.19838	-0.786149	3.90239	9.52488e-05	0.00134077	yes
XLOC_011644	XLOC_011644	Apod	16:31296304-31314875	FVA	AG1	OK	100.682	48.249	-1.06123	6.97502	3.05844e-12	1.35971e-10	yes
XLOC_011652	XLOC_011652	Lrrc33	16:32142881-32165688	FVA	AG1	OK	1.26148	2.13111	0.75648	-2.72132	0.00650224	0.0492055	yes
XLOC_011653	XLOC_011653	Fbxo45	16:32230061-32246816	FVA	AG1	OK	11.4821	16.1329	0.490621	-3.47909	0.000503113	0.00581682	yes
XLOC_011658	XLOC_011658	Kalrn	16:33967923-34573312	FVA	AG1	OK	30.7209	103.986	1.75909	-11.6468	0	0	yes
XLOC_011670	XLOC_011670	Fbxo40	16:36969743-36970512	FVA	AG1	OK	0.905014	0	-1.79769e+308	-1.79769e+308	7.47496e-06	0.000134907	yes
XLOC_011683	XLOC_011683	-	16:39175662-39189109	FVA	AG1	OK	0.173618	2.14586	3.62756	-3.54001	0.00040011	0.00476033	yes
XLOC_011685	XLOC_011685	Gap43	16:42228649-42341067	FVA	AG1	OK	184.564	86.6499	-1.09085	8.84384	0	0	yes
XLOC_011687	XLOC_011687	Zbtb20	16:43463072-43642727	FVA	AG1	OK	3.77506	10.8089	1.51764	-8.83393	0	0	yes
XLOC_011689	XLOC_011689	Zdhhc23	16:43964346-43979846	FVA	AG1	OK	2.7983	14.1172	2.33484	-10.9542	0	0	yes
XLOC_011692	XLOC_011692	Atp6v1a	16:44085512-44139397	FVA	AG1	OK	102.539	142.991	0.479757	-3.16118	0.00157132	0.0154571	yes
XLOC_011693	XLOC_011693	Sidt1	16:44240088-44333288	FVA	AG1	OK	8.22982	19.8629	1.27115	-6.11273	9.79412e-10	3.29291e-08	yes
XLOC_011694	XLOC_011694	Boc	16:44420202-44559005	FVA	AG1	OK	1.27097	2.58984	1.02693	-3.54203	0.000397062	0.00472772	yes
XLOC_011704	XLOC_011704	Plcxd2	16:45959283-46010544	FVA	AG1	OK	15.0962	5.25216	-1.5232	8.93504	0	0	yes
XLOC_011705	XLOC_011705	Pvrl3	16:46387797-46496905	FVA	AG1	OK	3.47688	8.21105	1.23977	-4.63886	3.50338e-06	6.75281e-05	yes
XLOC_011709	XLOC_011709	5330426P16Rik	16:50726393-50732889	FVA	AG1	OK	1.99834	2.82293	0.49839	-2.746	0.00603267	0.0462869	yes
XLOC_011710	XLOC_011710	Alcam	16:52249111-52453406	FVA	AG1	OK	14.6074	23.3651	0.67766	-5.34866	8.86086e-08	2.24596e-06	yes
XLOC_011713	XLOC_011713	Fam55c	16:55840635-55895600	FVA	AG1	OK	6.41666	4.3775	-0.551713	2.92931	0.00339716	0.0289801	yes
XLOC_011725	XLOC_011725	Crybg3	16:59471611-59600685	FVA	AG1	OK	1.02697	0.525159	-0.96757	2.93631	0.00332141	0.0284842	yes
XLOC_011727	XLOC_011727	Epha6	16:59641204-60606751	FVA	AG1	OK	4.50901	10.6362	1.2381	-4.27819	1.88421e-05	0.000312833	yes
XLOC_011730	XLOC_011730	Epha3	16:63543332-63863998	FVA	AG1	OK	1.31598	3.68412	1.48518	-3.606	0.00031095	0.00383389	yes
XLOC_011736	XLOC_011736	Robo2	16:73892096-74047186	FVA	AG1	OK	2.29262	4.24456	0.888617	-3.42001	0.000626191	0.00703821	yes
XLOC_011737	XLOC_011737	-	16:75420461-75447575	FVA	AG1	OK	0.720364	4.43447	2.62196	-3.17549	0.00149582	0.0148754	yes
XLOC_011740	XLOC_011740	Nrip1	16:76287649-76352800	FVA	AG1	OK	3.13657	5.49167	0.808058	-4.71279	2.44354e-06	4.82431e-05	yes
XLOC_011743	XLOC_011743	Btg3	16:78373360-78376492	FVA	AG1	OK	0.319649	1.36795	2.09746	-6.00766	1.88221e-09	6.14763e-08	yes
XLOC_011749	XLOC_011749	Adamts1	16:85794073-85803504	FVA	AG1	OK	2.93693	5.41103	0.881595	-3.56093	0.000369539	0.00444974	yes
XLOC_011759	XLOC_011759	2610039C10Rik	16:90719565-90727638	FVA	AG1	OK	1.48933	4.06412	1.44828	-4.168	3.07287e-05	0.000488404	yes
XLOC_011762	XLOC_011762	Synj1	16:90936243-91011715	FVA	AG1	OK	60.6812	86.1418	0.505462	-3.63657	0.000276291	0.00346322	yes
XLOC_011775	XLOC_011775	Kcnj6	16:94970243-95224053	FVA	AG1	OK	6.30859	12.5188	0.988704	-5.71185	1.11755e-08	3.24226e-07	yes
XLOC_011781	XLOC_011781	Pcp4	16:96689237-96758875	FVA	AG1	OK	443.295	102.961	-2.10617	3.59577	0.000323429	0.00397033	yes
XLOC_011815	XLOC_011815	-	16:6268421-6271302	FVA	AG1	OK	0.98482	2.32794	1.24112	-4.74834	2.05094e-06	4.11493e-05	yes
XLOC_011816	XLOC_011816	-	16:6271435-6278718	FVA	AG1	OK	0.875369	1.46706	0.744965	-3.49756	0.000469532	0.00547119	yes
XLOC_011838	XLOC_011838	-	16:8947063-8948416	FVA	AG1	OK	0.10451	0.578643	2.46903	-2.84657	0.00441932	0.0358865	yes
XLOC_011846	XLOC_011846	-	16:9556820-9567314	FVA	AG1	OK	0.197314	0.796805	2.01374	-7.30759	2.72005e-13	1.33403e-11	yes
XLOC_011899	XLOC_011899	-	16:13458611-13460103	FVA	AG1	OK	0.835176	0.110604	-2.91668	3.74706	0.000178918	0.00236957	yes
XLOC_011905	XLOC_011905	-	16:13534921-13535958	FVA	AG1	OK	0.117532	0.811184	2.78698	-2.94448	0.00323497	0.0278812	yes
XLOC_011929	XLOC_011929	-	16:14939674-14943042	FVA	AG1	OK	0.813209	0.0913667	-3.15389	5.69987	1.19899e-08	3.45583e-07	yes
XLOC_011930	XLOC_011930	-	16:14943358-14944858	FVA	AG1	OK	1.03261	0.308202	-1.74436	3.40582	0.000659649	0.0073687	yes
XLOC_012007	XLOC_012007	-	16:20580128-20583553	FVA	AG1	OK	2.17102	0.171627	-3.66102	9.04134	0	0	yes
XLOC_012009	XLOC_012009	Ece2	16:20622560-20623182	FVA	AG1	OK	1.43012	0.195502	-2.87088	2.81948	0.00481013	0.0384437	yes
XLOC_012015	XLOC_012015	Chrd	16:20724780-20742759	FVA	AG1	OK	0.83363	7.46587	3.16283	-3.65859	0.000253609	0.00322072	yes
XLOC_012017	XLOC_012017	-	16:21331975-21333426	FVA	AG1	OK	4.03397	6.36558	0.658092	-2.9038	0.00368668	0.0310892	yes
XLOC_012039	XLOC_012039	-	16:23989033-23995378	FVA	AG1	OK	0.591015	1.25581	1.08735	-4.50939	6.50141e-06	0.000118935	yes
XLOC_012040	XLOC_012040	-	16:24379485-24380807	FVA	AG1	OK	4.57231	2.48948	-0.877077	3.40635	0.000658369	0.00736239	yes
XLOC_012143	XLOC_012143	Cd80	16:38483259-38483720	FVA	AG1	OK	105.945	65.413	-0.69566	4.24966	2.14092e-05	0.000350186	yes
XLOC_012155	XLOC_012155	-	16:39037980-39039125	FVA	AG1	OK	0.045014	0.850684	4.24018	-3.06724	0.00216044	0.0201307	yes
XLOC_012179	XLOC_012179	Lsamp	16:41714174-41716693	FVA	AG1	OK	0.427394	1.04467	1.2894	-3.53585	0.000406467	0.00482113	yes
XLOC_012192	XLOC_012192	-	16:43827603-43829152	FVA	AG1	OK	0.803377	0.0588892	-3.77	3.73762	0.000185769	0.00245399	yes
XLOC_012202	XLOC_012202	-	16:44233814-44235589	FVA	AG1	OK	0.09856	0.472579	2.26148	-2.92747	0.00341728	0.0291194	yes
XLOC_012216	XLOC_012216	-	16:45193156-45203855	FVA	AG1	OK	1.03334	0.646964	-0.675563	3.30015	0.000966335	0.0102358	yes
XLOC_012244	XLOC_012244	-	16:56049036-56050298	FVA	AG1	OK	0.619526	1.64581	1.40956	-3.40144	0.000670311	0.0074716	yes
XLOC_012275	XLOC_012275	Cadm2	16:67189571-67191758	FVA	AG1	OK	0.200584	0.695607	1.79407	-3.51862	0.000433793	0.00511188	yes
XLOC_012284	XLOC_012284	Cadm2	16:67250191-67251789	FVA	AG1	OK	0.201698	0.88374	2.13142	-3.68819	0.000225855	0.00291255	yes
XLOC_012295	XLOC_012295	-	16:72308170-72308862	FVA	AG1	OK	1.19232	0.196847	-2.59862	2.73195	0.00629605	0.0479506	yes
XLOC_012312	XLOC_012312	-	16:75165186-75168864	FVA	AG1	OK	0.0173917	0.769441	5.46734	-4.78214	1.73436e-06	3.53252e-05	yes
XLOC_012319	XLOC_012319	-	16:77684204-77691660	FVA	AG1	OK	0.531737	0.845152	0.668499	-2.74522	0.00604702	0.046374	yes
XLOC_012396	XLOC_012396	Kcnj6	16:94966435-94970175	FVA	AG1	OK	9.74673	32.1388	1.72133	-12.0199	0	0	yes
XLOC_012426	XLOC_012426	Arid1b	17:4996138-5345920	FVA	AG1	OK	0.518377	1.56908	1.59785	-3.05522	0.00224894	0.0207985	yes
XLOC_012427	XLOC_012427	Zdhhc14	17:5488719-5753909	FVA	AG1	OK	3.9401	5.54513	0.492991	-2.88348	0.0039331	0.0326768	yes
XLOC_012438	XLOC_012438	Sft2d1	17:8503920-8519447	FVA	AG1	OK	3.02473	1.03103	-1.55272	2.95968	0.00307959	0.0267585	yes
XLOC_012439	XLOC_012439	Prr18	17:8533244-8537058	FVA	AG1	OK	16.8497	11.9171	-0.499693	2.82701	0.00469855	0.0376904	yes
XLOC_012448	XLOC_012448	4732491K20Rik	17:12511732-12529812	FVA	AG1	OK	3.04393	1.14636	-1.40888	4.38045	1.18434e-05	0.000204663	yes
XLOC_012449	XLOC_012449	Slc22a3	17:12659719-12672561	FVA	AG1	OK	2.12407	0.0184901	-6.84394	3.17111	0.00151856	0.0150675	yes
XLOC_012456	XLOC_012456	Smoc2	17:14386734-14541856	FVA	AG1	OK	2.65529	17.0148	2.67985	-9.5174	0	0	yes
XLOC_012466	XLOC_012466	Lix1	17:17585764-17596035	FVA	AG1	OK	5.92286	14.1106	1.25241	-5.42453	5.81088e-08	1.51771e-06	yes
XLOC_012467	XLOC_012467	Lnpep	17:17658317-17762322	FVA	AG1	OK	3.80412	10.6445	1.48447	-6.44789	1.13418e-10	4.2426e-09	yes
XLOC_012468	XLOC_012468	Ncrna00085	17:17964525-17976645	FVA	AG1	OK	3.66328	5.27029	0.524747	-3.29371	0.000988753	0.0104232	yes
XLOC_012469	XLOC_012469	Has1	17:17986893-17996175	FVA	AG1	OK	1.80937	0.178544	-3.34114	4.03583	5.4409e-05	0.000821264	yes
XLOC_012470	XLOC_012470	-	17:17997556-18007714	FVA	AG1	OK	3.48112	1.48969	-1.22454	5.10494	3.30904e-07	7.63006e-06	yes
XLOC_012475	XLOC_012475	Zfp677	17:21520700-21536195	FVA	AG1	OK	1.27573	0.654341	-0.963207	3.26611	0.00109034	0.0113931	yes
XLOC_012513	XLOC_012513	Rpusd1	17:25864620-25868409	FVA	AG1	OK	18.8697	29.0996	0.624926	-3.4164	0.00063454	0.00711911	yes
XLOC_012517	XLOC_012517	Fbxl16	17:25945975-25958288	FVA	AG1	OK	79.0079	214.033	1.43776	-11.3828	0	0	yes
XLOC_012525	XLOC_012525	Rgs11	17:26338283-26348495	FVA	AG1	OK	10.5606	15.2511	0.530218	-3.02988	0.00244649	0.0222197	yes
XLOC_012528	XLOC_012528	Neurl1b	17:26576151-26583384	FVA	AG1	OK	2.46314	5.63994	1.19518	-3.60242	0.000315272	0.00387944	yes
XLOC_012535	XLOC_012535	Syngap1	17:27069737-27109457	FVA	AG1	OK	34.3985	92.2993	1.42398	-8.63993	0	0	yes
XLOC_012538	XLOC_012538	Hmga1	17:27693517-27699324	FVA	AG1	OK	13.1531	5.49774	-1.25849	3.71851	0.000200403	0.00261378	yes
XLOC_012541	XLOC_012541	Uhrf1bp1	17:27993469-28037076	FVA	AG1	OK	4.37893	3.09679	-0.499806	3.08763	0.00201759	0.019035	yes
XLOC_012550	XLOC_012550	Lhfpl5	17:28712596-28720688	FVA	AG1	OK	8.09372	1.60304	-2.33599	9.18741	0	0	yes
XLOC_012551	XLOC_012551	Mapk14	17:28828523-28885352	FVA	AG1	OK	19.8274	30.2773	0.61074	-3.48401	0.000493956	0.00572908	yes
XLOC_012557	XLOC_012557	Pi16	17:29463647-29465850	FVA	AG1	OK	1.58399	0.363172	-2.12484	4.42549	9.6222e-06	0.000169987	yes
XLOC_012559	XLOC_012559	Pim1	17:29628224-29633057	FVA	AG1	OK	1.72206	0.922179	-0.901021	3.11719	0.00182583	0.0175582	yes
XLOC_012562	XLOC_012562	Zfand3	17:30142107-30347945	FVA	AG1	OK	13.8481	21.714	0.648938	-3.73188	0.000190054	0.00249779	yes
XLOC_012563	XLOC_012563	Glp1r	17:31038889-31077715	FVA	AG1	OK	2.68582	1.19971	-1.16267	5.44298	5.23965e-08	1.38018e-06	yes
XLOC_012571	XLOC_012571	Gm17276	17:32250346-32301194	FVA	AG1	OK	1.18341	0.238311	-2.31203	4.57299	4.80814e-06	9.02066e-05	yes
XLOC_012573	XLOC_012573	Cyp4f15	17:32643391-32840423	FVA	AG1	OK	19.6504	12.3015	-0.675721	2.78912	0.00528508	0.0416159	yes
XLOC_012592	XLOC_012592	H2-DMa	17:34259745-34276791	FVA	AG1	OK	2.34136	3.99712	0.771611	-2.87701	0.00401462	0.0331677	yes
XLOC_012604	XLOC_012604	Agpat1	17:34742817-34752503	FVA	AG1	OK	28.0608	38.0375	0.438863	-3.44043	0.0005808	0.00658976	yes
XLOC_012605	XLOC_012605	Prrt1	17:34753585-34771712	FVA	AG1	OK	1.88323	5.41192	1.52293	-3.59458	0.00032492	0.00398388	yes
XLOC_012607	XLOC_012607	Atf6b	17:34784031-34792204	FVA	AG1	OK	16.6761	29.1741	0.806904	-4.33031	1.48902e-05	0.000252513	yes
XLOC_012629	XLOC_012629	H2-D1	17:35399786-35404442	FVA	AG1	OK	23.3589	14.9053	-0.648148	4.34962	1.36375e-05	0.000232802	yes
XLOC_012630	XLOC_012630	H2-Gs10,H2-Q2	17:35457888-35562887	FVA	AG1	OK	18.6112	7.4857	-1.31396	3.21335	0.00131197	0.013339	yes
XLOC_012634	XLOC_012634	Ier3	17:35958543-35959892	FVA	AG1	OK	6.55438	2.59756	-1.3353	5.33411	9.60128e-08	2.41974e-06	yes
XLOC_012641	XLOC_012641	Ppp1r10	17:36048058-36090474	FVA	AG1	OK	9.96409	14.8889	0.579423	-3.06974	0.00214245	0.0199992	yes
XLOC_012643	XLOC_012643	RP24-443D19.8	17:36131361-36151522	FVA	AG1	OK	4.01321	0.583289	-2.78247	16.185	0	0	yes
XLOC_012657	XLOC_012657	H2-M3	17:37407166-37411432	FVA	AG1	OK	2.75168	0.890461	-1.62769	3.31766	0.000907764	0.00970858	yes
XLOC_012661	XLOC_012661	Tnfrsf21	17:43153277-43226282	FVA	AG1	OK	18.301	31.7827	0.796317	-6.09806	1.07364e-09	3.59406e-08	yes
XLOC_012662	XLOC_012662	Gpr116	17:43497237-43596501	FVA	AG1	OK	6.9388	4.52149	-0.617887	3.41292	0.000642705	0.00719503	yes
XLOC_012663	XLOC_012663	Pla2g7	17:43705069-43749445	FVA	AG1	OK	62.9009	48.3741	-0.378848	3.04617	0.00231776	0.0213074	yes
XLOC_012665	XLOC_012665	Rcan2	17:43938587-44176575	FVA	AG1	OK	85.2314	29.0911	-1.55081	9.87047	0	0	yes
XLOC_012686	XLOC_012686	Srf	17:46692696-46698990	FVA	AG1	OK	0.697454	2.2651	1.6994	-4.39296	1.11817e-05	0.000194313	yes
XLOC_012688	XLOC_012688	Cul7	17:46787540-46801315	FVA	AG1	OK	8.84438	5.84156	-0.598408	3.00216	0.0026807	0.0239319	yes
XLOC_012692	XLOC_012692	Trerf1	17:47277788-47499136	FVA	AG1	OK	3.99427	8.07528	1.01558	-5.08695	3.6387e-07	8.31573e-06	yes
XLOC_012700	XLOC_012700	Lrfn2	17:49070950-49236984	FVA	AG1	OK	3.51241	5.8205	0.728684	-4.12812	3.65748e-05	0.000572776	yes
XLOC_012703	XLOC_012703	Plcl2	17:50648971-50835609	FVA	AG1	OK	3.09849	4.26176	0.459882	-3.16334	0.00155972	0.0153722	yes
XLOC_012707	XLOC_012707	Kat2b	17:53793762-53805504	FVA	AG1	OK	7.5612	4.36448	-0.792804	2.82963	0.00466013	0.0374386	yes
XLOC_012714	XLOC_012714	Shd	17:56109864-56116044	FVA	AG1	OK	18.9804	7.4081	-1.35734	5.99226	2.06947e-09	6.70959e-08	yes
XLOC_012719	XLOC_012719	Tnfaip8l1	17:56301922-56313127	FVA	AG1	OK	1.18112	2.79824	1.24436	-4.50983	6.48796e-06	0.000118761	yes
XLOC_012723	XLOC_012723	Kdm4b	17:56465466-56546747	FVA	AG1	OK	6.78858	10.8002	0.669873	-4.06815	4.73885e-05	0.000725934	yes
XLOC_012746	XLOC_012746	Epb4.1l3	17:69425029-69639401	FVA	AG1	OK	106.742	50.3138	-1.0851	5.56781	2.57967e-08	7.11665e-07	yes
XLOC_012748	XLOC_012748	C030034I22Rik	17:69765731-69788681	FVA	AG1	OK	0.663134	1.37074	1.04759	-2.96471	0.0030297	0.0263844	yes
XLOC_012755	XLOC_012755	Fam179a	17:72036923-72079001	FVA	AG1	OK	3.58726	1.45182	-1.30502	3.44243	0.000576504	0.00654883	yes
XLOC_012758	XLOC_012758	Lbh	17:73267602-73291288	FVA	AG1	OK	23.2134	13.1744	-0.817213	5.94018	2.84703e-09	8.97626e-08	yes
XLOC_012759	XLOC_012759	Lclat1	17:73457341-73592793	FVA	AG1	OK	5.67941	8.70016	0.615301	-3.31624	0.00091236	0.00975052	yes
XLOC_012760	XLOC_012760	Ehd3	17:74154083-74181589	FVA	AG1	OK	23.5993	42.5033	0.84883	-6.64599	3.01195e-11	1.21492e-09	yes
XLOC_012764	XLOC_012764	Birc6	17:74927984-75102782	FVA	AG1	OK	11.764	7.73066	-0.605713	3.84983	0.0001182	0.00162825	yes
XLOC_012766	XLOC_012766	Ltbp1	17:75578519-75791073	FVA	AG1	OK	0.543734	1.29186	1.24847	-4.23669	2.26835e-05	0.000370246	yes
XLOC_012769	XLOC_012769	Gm10093	17:78890881-78892890	FVA	AG1	OK	10.0491	15.9124	0.663086	-4.00413	6.22458e-05	0.000921107	yes
XLOC_012779	XLOC_012779	-	17:80701567-80705360	FVA	AG1	OK	0.566171	1.5091	1.41437	-4.95522	7.22489e-07	1.57208e-05	yes
XLOC_012783	XLOC_012783	-	17:81328191-81334065	FVA	AG1	OK	1.03051	0.452809	-1.18638	4.44146	8.93503e-06	0.000158808	yes
XLOC_012784	XLOC_012784	Tmem178	17:81343919-81409485	FVA	AG1	OK	1.77433	12.1556	2.77628	-16.8556	0	0	yes
XLOC_012786	XLOC_012786	Eml4	17:83750486-83879729	FVA	AG1	OK	6.46735	10.0576	0.637038	-3.69518	0.000219732	0.0028407	yes
XLOC_012792	XLOC_012792	Six3	17:86001750-86025499	FVA	AG1	OK	7.80414	0.286149	-4.7694	10.535	0	0	yes
XLOC_012807	XLOC_012807	Adcyap1	17:93598343-93605938	FVA	AG1	OK	5.75834	1.60019	-1.84741	6.64916	2.94773e-11	1.19058e-09	yes
XLOC_012816	XLOC_012816	Tmem181b-ps	17:6437689-6447765	FVA	AG1	OK	19.3416	43.5332	1.17041	-5.60772	2.05008e-08	5.75325e-07	yes
XLOC_012817	XLOC_012817	Ezr	17:6942536-6987139	FVA	AG1	OK	9.19285	18.0687	0.974911	-6.35076	2.14247e-10	7.78801e-09	yes
XLOC_012823	XLOC_012823	4930506C21Rik	17:8476584-8492550	FVA	AG1	OK	3.38192	1.7417	-0.957343	3.16572	0.00154698	0.0152959	yes
XLOC_012831	XLOC_012831	Slc22a3	17:12650459-12651474	FVA	AG1	OK	1.1358	0.200187	-2.50429	4.30891	1.64058e-05	0.000275493	yes
XLOC_012835	XLOC_012835	Mas1	17:13031681-13045041	FVA	AG1	OK	1.13158	13.9837	3.62733	-10.5809	0	0	yes
XLOC_012841	XLOC_012841	-	17:13371607-13376586	FVA	AG1	OK	0.255815	0.687463	1.42618	-3.66689	0.000245518	0.00314382	yes
XLOC_012845	XLOC_012845	Gm16052	17:13893023-13897204	FVA	AG1	OK	1.91847	3.1403	0.710949	-3.48796	0.000486716	0.00565359	yes
XLOC_012846	XLOC_012846	Dact2	17:14332239-14341365	FVA	AG1	OK	3.85301	8.7219	1.17866	-4.5456	5.47796e-06	0.000101657	yes
XLOC_012847	XLOC_012847	Thbs2	17:14802629-14831118	FVA	AG1	OK	1.81344	0.868218	-1.0626	4.13785	3.50577e-05	0.000550974	yes
XLOC_012856	XLOC_012856	Rgmb	17:15940970-15963577	FVA	AG1	OK	10.3625	16.3063	0.654058	-4.76814	1.85931e-06	3.76467e-05	yes
XLOC_012858	XLOC_012858	Lnpep	17:17658317-17762322	FVA	AG1	OK	7.50688	0.956594	-2.97223	11.0596	0	0	yes
XLOC_012887	XLOC_012887	Ccnf	17:24360030-24388327	FVA	AG1	OK	0.581212	1.39459	1.26271	-4.26044	2.04026e-05	0.000335855	yes
XLOC_012892	XLOC_012892	Traf7	17:24625803-24665736	FVA	AG1	OK	8.2487	20.0963	1.28469	-5.93498	2.93889e-09	9.25644e-08	yes
XLOC_012893	XLOC_012893	Tsc2	17:24687346-24775775	FVA	AG1	OK	16.838	25.1787	0.580481	-2.82481	0.0047308	0.0379175	yes
XLOC_012896	XLOC_012896	Gfer	17:24828911-24832982	FVA	AG1	OK	6.05705	3.94088	-0.620099	3.2289	0.00124265	0.0127772	yes
XLOC_012907	XLOC_012907	Cacna1h	17:25511077-25534954	FVA	AG1	OK	0.863562	2.9932	1.79332	-5.5235	3.32316e-08	9.06258e-07	yes
XLOC_012908	XLOC_012908	Sstr5	17:25628117-25634120	FVA	AG1	OK	0.747528	0.0959437	-2.96187	3.09616	0.00196047	0.0185812	yes
XLOC_012918	XLOC_012918	Solh	17:26095306-26122778	FVA	AG1	OK	8.96755	13.0319	0.539256	-3.11944	0.00181193	0.0174463	yes
XLOC_012919	XLOC_012919	Rab11fip3	17:26123928-26206565	FVA	AG1	OK	15.6137	21.8105	0.482207	-3.94121	8.10712e-05	0.00115755	yes
XLOC_012931	XLOC_012931	Grm4	17:27562773-27650642	FVA	AG1	OK	20.1579	3.25236	-2.63179	13.7217	0	0	yes
XLOC_012932	XLOC_012932	AI413582	17:27699381-27702749	FVA	AG1	OK	34.5949	22.8554	-0.598028	3.51341	0.000442394	0.00520331	yes
XLOC_012939	XLOC_012939	Fkbp5	17:28535737-28622953	FVA	AG1	OK	6.70379	15.9757	1.25283	-8.12575	4.44089e-16	2.74429e-14	yes
XLOC_012948	XLOC_012948	Mdga1	17:29964901-30025402	FVA	AG1	OK	5.12103	16.1275	1.65502	-9.8983	0	0	yes
XLOC_012949	XLOC_012949	Btbd9	17:30352312-30714440	FVA	AG1	OK	10.5871	17.0386	0.686499	-5.34942	8.82357e-08	2.24019e-06	yes
XLOC_012955	XLOC_012955	Sik1	17:31981268-31992685	FVA	AG1	OK	3.98621	2.78008	-0.519891	2.87871	0.0039931	0.0330686	yes
XLOC_012957	XLOC_012957	Notch3	17:32250346-32301194	FVA	AG1	OK	7.82482	3.55302	-1.13901	4.95501	7.23279e-07	1.57269e-05	yes
XLOC_012974	XLOC_012974	RP23-27D5.9	17:33997233-34003080	FVA	AG1	OK	1.07612	0.419356	-1.3596	5.23833	1.62036e-07	3.95779e-06	yes
XLOC_012996	XLOC_012996	Hspa1b	17:35093377-35096424	FVA	AG1	OK	3.88431	12.2287	1.65455	-9.29122	0	0	yes
XLOC_013031	XLOC_013031	Trim40	17:37018567-37021011	FVA	AG1	OK	1.84849	0.0626762	-4.88229	3.03204	0.00242906	0.0221069	yes
XLOC_013036	XLOC_013036	Mog	17:37138835-37160394	FVA	AG1	OK	23.7393	16.897	-0.490509	3.19912	0.00137848	0.0139007	yes
XLOC_013037	XLOC_013037	Gm10202	17:37850022-37850878	FVA	AG1	OK	41.3256	29.5064	-0.486008	3.01989	0.00252866	0.0228119	yes
XLOC_013038	XLOC_013038	AY036118	17:39981973-39985775	FVA	AG1	OK	100.197	76.1196	-0.396493	3.17405	0.00150328	0.01494	yes
XLOC_013045	XLOC_013045	Slc25a27	17:43774691-43804148	FVA	AG1	OK	13.3057	8.4369	-0.657264	3.56027	0.000370479	0.00445931	yes
XLOC_013047	XLOC_013047	AC165141.1	17:44632936-45256350	FVA	AG1	OK	0.920238	3.41715	1.89271	-5.65167	1.58892e-08	4.51651e-07	yes
XLOC_013053	XLOC_013053	Slc29a1	17:45722072-45732531	FVA	AG1	OK	39.5586	13.7176	-1.52796	6.05149	1.43509e-09	4.7424e-08	yes
XLOC_013054	XLOC_013054	Capn11	17:45767177-45781066	FVA	AG1	OK	0.12638	1.03841	3.03854	-5.75421	8.70476e-09	2.56641e-07	yes
XLOC_013065	XLOC_013065	Srf	17:46683718-46692594	FVA	AG1	OK	10.2462	23.0537	1.16992	-6.48742	8.73215e-11	3.32273e-09	yes
XLOC_013067	XLOC_013067	Klc4	17:46767570-46787112	FVA	AG1	OK	12.2112	8.42347	-0.535715	3.03414	0.00241222	0.0219861	yes
XLOC_013069	XLOC_013069	Ppp2r5d	17:46817945-46841981	FVA	AG1	OK	44.0042	31.9243	-0.462987	3.34952	0.000809505	0.00878542	yes
XLOC_013073	XLOC_013073	BC032203	17:46934987-46995459	FVA	AG1	OK	11.7824	16.5397	0.489304	-3.36232	0.000772909	0.0084297	yes
XLOC_013077	XLOC_013077	Bysl	17:47731248-47748450	FVA	AG1	OK	4.17408	6.10246	0.547934	-2.71883	0.0065513	0.0495161	yes
XLOC_013083	XLOC_013083	Rftn1	17:50132085-50329651	FVA	AG1	OK	6.00603	3.7203	-0.690992	3.77978	0.000156969	0.00209867	yes
XLOC_013084	XLOC_013084	Dazl	17:50418720-50432199	FVA	AG1	OK	0.288547	1.30244	2.17434	-5.01205	5.38525e-07	1.1988e-05	yes
XLOC_013086	XLOC_013086	Satb1	17:51875529-51972517	FVA	AG1	OK	8.16395	21.2626	1.38098	-6.25229	4.04478e-10	1.41696e-08	yes
XLOC_013089	XLOC_013089	Slc5a7	17:54413086-54436521	FVA	AG1	OK	2.38208	0.237054	-3.32894	7.19065	6.44818e-13	3.05576e-11	yes
XLOC_013094	XLOC_013094	Sh3gl1	17:56148493-56176022	FVA	AG1	OK	4.73081	9.90365	1.06587	-4.60037	4.21739e-06	8.00424e-05	yes
XLOC_013103	XLOC_013103	Plin3	17:56418214-56430689	FVA	AG1	OK	7.89932	5.59661	-0.497175	2.7504	0.0059522	0.0457832	yes
XLOC_013105	XLOC_013105	-	17:56690800-56699230	FVA	AG1	OK	1.69031	2.93171	0.794456	-3.58863	0.000332427	0.00406509	yes
XLOC_013111	XLOC_013111	Mllt1	17:57026509-57074787	FVA	AG1	OK	5.67226	8.69045	0.615506	-4.41955	9.89076e-06	0.000174432	yes
XLOC_013114	XLOC_013114	Slc25a23	17:57183127-57199340	FVA	AG1	OK	81.2403	126.687	0.641003	-3.54645	0.000390462	0.00466351	yes
XLOC_013116	XLOC_013116	Tubb4	17:57219481-57227235	FVA	AG1	OK	382.272	294.489	-0.376383	2.89814	0.00375379	0.0315176	yes
XLOC_013118	XLOC_013118	C3	17:57363491-57365464	FVA	AG1	OK	2.01075	0.373543	-2.42839	3.83922	0.000123428	0.00169121	yes
XLOC_013121	XLOC_013121	Nudt12	17:59139533-59152722	FVA	AG1	OK	3.46769	1.72354	-1.0086	4.62918	3.67121e-06	7.04117e-05	yes
XLOC_013122	XLOC_013122	Efna5	17:62952300-63230820	FVA	AG1	OK	3.69114	1.39213	-1.40677	5.25802	1.45618e-07	3.56803e-06	yes
XLOC_013128	XLOC_013128	Rab31	17:66001046-66121981	FVA	AG1	OK	25.1196	18.0588	-0.476108	3.59548	0.000323788	0.00397162	yes
XLOC_013130	XLOC_013130	Twsg1	17:66272393-66300481	FVA	AG1	OK	6.2753	8.77852	0.484293	-3.08383	0.00204352	0.019215	yes
XLOC_013131	XLOC_013131	Ankrd12	17:66315036-66376736	FVA	AG1	OK	3.74898	1.22827	-1.60987	2.86236	0.00420496	0.034408	yes
XLOC_013135	XLOC_013135	Ptprm	17:67016194-67703700	FVA	AG1	OK	13.5905	4.82094	-1.49521	8.61144	0	0	yes
XLOC_013141	XLOC_013141	Emilin2	17:71601524-71660097	FVA	AG1	OK	1.98303	0.771697	-1.3616	5.45918	4.78334e-08	1.27394e-06	yes
XLOC_013145	XLOC_013145	Alk	17:72217351-72401152	FVA	AG1	OK	2.19884	0.883774	-1.31499	4.14892	3.34041e-05	0.000526591	yes
XLOC_013156	XLOC_013156	Fez2	17:78777222-78817451	FVA	AG1	OK	25.0373	16.294	-0.619737	4.11155	3.93009e-05	0.000611132	yes
XLOC_013162	XLOC_013162	Cdc42ep3	17:79733066-79754406	FVA	AG1	OK	3.41187	1.8343	-0.895332	3.79416	0.000148146	0.00199278	yes
XLOC_013165	XLOC_013165	Hnrpll	17:80427368-80461755	FVA	AG1	OK	9.3263	13.8675	0.572334	-3.65396	0.000258223	0.00326504	yes
XLOC_013170	XLOC_013170	Cdkl4	17:80922908-80977129	FVA	AG1	OK	1.79982	6.04325	1.74747	-6.72295	1.7808e-11	7.33641e-10	yes
XLOC_013171	XLOC_013171	Map4k3	17:80979853-81127468	FVA	AG1	OK	12.3037	24.3417	0.98434	-5.94431	2.77623e-09	8.762e-08	yes
XLOC_013173	XLOC_013173	Slc8a1	17:81772349-81837398	FVA	AG1	OK	11.6745	8.32327	-0.488143	2.72978	0.00633759	0.0482194	yes
XLOC_013175	XLOC_013175	-	17:83943379-83948397	FVA	AG1	OK	0.346376	6.40832	4.20954	-4.75188	2.01531e-06	4.05926e-05	yes
XLOC_013176	XLOC_013176	Kcng3	17:83973360-84030966	FVA	AG1	OK	0.566928	2.74366	2.27487	-8.39783	0	0	yes
XLOC_013185	XLOC_013185	-	17:87489420-87506814	FVA	AG1	OK	0.624638	2.15451	1.78627	-3.50197	0.000461829	0.00539289	yes
XLOC_013188	XLOC_013188	Calm2	17:87832743-87846303	FVA	AG1	OK	512.518	858.557	0.744311	-5.63746	1.72582e-08	4.89213e-07	yes
XLOC_013191	XLOC_013191	Fbxo11	17:88374367-88464783	FVA	AG1	OK	19.5528	25.7618	0.397862	-3.41987	0.000626521	0.00703936	yes
XLOC_013195	XLOC_013195	2610044O15Rik	17:95153298-95167850	FVA	AG1	OK	1.4138	2.2186	0.650072	-2.85914	0.00424786	0.0347224	yes
XLOC_013217	XLOC_013217	-	17:4988863-4992557	FVA	AG1	OK	1.00097	1.9705	0.977169	-3.99014	6.6035e-05	0.000969287	yes
XLOC_013229	XLOC_013229	Tmem181b-ps	17:6448876-6449137	FVA	AG1	OK	19.1507	38.6638	1.01358	-3.04386	0.00233562	0.0214206	yes
XLOC_013246	XLOC_013246	-	17:8190007-8197466	FVA	AG1	OK	1.73673	0.371152	-2.22629	9.50743	0	0	yes
XLOC_013247	XLOC_013247	-	17:8197899-8200661	FVA	AG1	OK	0.887711	0.0487813	-4.18569	5.21354	1.85266e-07	4.48616e-06	yes
XLOC_013260	XLOC_013260	T2	17:8556289-8615825	FVA	AG1	OK	1.06716	0.468972	-1.1862	2.8715	0.00408533	0.0335919	yes
XLOC_013264	XLOC_013264	-	17:10033533-10038246	FVA	AG1	OK	0.287804	0.70886	1.30041	-3.99181	6.557e-05	0.000963378	yes
XLOC_013271	XLOC_013271	Pacrg	17:10595137-11033418	FVA	AG1	OK	2.23605	0.598444	-1.90167	3.82778	0.000129305	0.00176158	yes
XLOC_013272	XLOC_013272	Pacrg	17:10595137-11033418	FVA	AG1	OK	1.7798	0.686206	-1.375	3.3326	0.000860392	0.00928875	yes
XLOC_013280	XLOC_013280	Park2	17:11657841-11749959	FVA	AG1	OK	0.219518	1.30403	2.57057	-3.87646	0.000105989	0.00148183	yes
XLOC_013286	XLOC_013286	-	17:12533079-12535125	FVA	AG1	OK	1.05652	0.447435	-1.23957	3.20474	0.00135185	0.013686	yes
XLOC_013347	XLOC_013347	-	17:17996231-17997498	FVA	AG1	OK	1.73052	0.142736	-3.59979	4.86518	1.14352e-06	2.39379e-05	yes
XLOC_013351	XLOC_013351	-	17:20798585-20799031	FVA	AG1	OK	32.7003	82.8091	1.34048	-6.85998	6.88716e-12	2.97206e-10	yes
XLOC_013374	XLOC_013374	Zfp943	17:22151854-22155512	FVA	AG1	OK	0.452317	0.839524	0.892237	-2.84113	0.00449536	0.0363987	yes
XLOC_013578	XLOC_013578	-	17:33992788-33994655	FVA	AG1	OK	0.505644	0.0623161	-3.02044	3.34543	0.000821561	0.00890375	yes
XLOC_013581	XLOC_013581	RP23-27D5.9	17:33996006-33997175	FVA	AG1	OK	0.721716	0.168507	-2.09862	2.76456	0.00570003	0.04424	yes
XLOC_013599	XLOC_013599	Ly6g6f	17:35220601-35222073	FVA	AG1	OK	0.968579	0.33027	-1.55222	3.06198	0.0021988	0.0204204	yes
XLOC_013642	XLOC_013642	Cd2ap	17:42935353-42953039	FVA	AG1	OK	0.958954	0.130268	-2.87998	3.67698	0.000236014	0.00302838	yes
XLOC_013643	XLOC_013643	Cd2ap	17:42953320-42967057	FVA	AG1	OK	0.787218	0.127083	-2.63099	3.57125	0.00035528	0.00430319	yes
XLOC_013661	XLOC_013661	-	17:45306490-45306909	FVA	AG1	OK	0.451608	3.39585	2.91063	-3.07876	0.00207866	0.019498	yes
XLOC_013662	XLOC_013662	-	17:45324424-45328097	FVA	AG1	OK	0.0756243	1.34736	4.15514	-7.0105	2.37477e-12	1.06496e-10	yes
XLOC_013748	XLOC_013748	-	17:50114249-50115746	FVA	AG1	OK	0.143939	0.970316	2.753	-4.00429	6.2204e-05	0.000920929	yes
XLOC_013809	XLOC_013809	-	17:58554890-58557402	FVA	AG1	OK	2.45716	7.95239	1.6944	-8.11373	4.44089e-16	2.74429e-14	yes
XLOC_013812	XLOC_013812	-	17:63231018-63232045	FVA	AG1	OK	1.66055	0.660277	-1.33052	2.89305	0.00381519	0.0319376	yes
XLOC_013858	XLOC_013858	-	17:69702892-69705429	FVA	AG1	OK	1.45313	0.472437	-1.62097	4.85288	1.21681e-06	2.52921e-05	yes
XLOC_013887	XLOC_013887	-	17:74586035-74589684	FVA	AG1	OK	2.17354	3.46977	0.674794	-3.30074	0.000964309	0.0102213	yes
XLOC_013908	XLOC_013908	-	17:80461906-80463677	FVA	AG1	OK	0.206455	0.716261	1.79466	-3.25566	0.00113128	0.0117652	yes
XLOC_013914	XLOC_013914	-	17:80705412-80706008	FVA	AG1	OK	0.420412	2.01367	2.25995	-3.01811	0.00254356	0.0229061	yes
XLOC_013920	XLOC_013920	-	17:81343132-81343768	FVA	AG1	OK	0.260378	1.75883	2.75594	-3.11687	0.00182782	0.0175718	yes
XLOC_013974	XLOC_013974	1700106N22Rik	17:85489880-85857923	FVA	AG1	OK	0.562682	1.38363	1.29806	-3.16338	0.00155948	0.0153722	yes
XLOC_014019	XLOC_014019	-	17:88474189-88478071	FVA	AG1	OK	0.513483	0.944868	0.879796	-2.97635	0.00291706	0.0256201	yes
XLOC_014025	XLOC_014025	Gtf2a1l	17:89072625-89073274	FVA	AG1	OK	3.47148	0.0245936	-7.14112	2.73959	0.00615161	0.047106	yes
XLOC_014052	XLOC_014052	9430020K01Rik	18:4604890-4682867	FVA	AG1	OK	6.57679	13.1783	1.00271	-5.6571	1.53954e-08	4.38824e-07	yes
XLOC_014071	XLOC_014071	Impact	18:13114334-13151457	FVA	AG1	OK	16.8498	9.53841	-0.820912	6.66913	2.57323e-11	1.04478e-09	yes
XLOC_014076	XLOC_014076	-	18:16180242-16191310	FVA	AG1	OK	4.20352	0.0634346	-6.05018	4.72308	2.32303e-06	4.614e-05	yes
XLOC_014077	XLOC_014077	7SK	18:16191575-16194847	FVA	AG1	OK	1.7904	0.0530068	-5.07796	7.27573	3.44613e-13	1.67947e-11	yes
XLOC_014081	XLOC_014081	Ttr	18:20818884-20832827	FVA	AG1	OK	52.9248	392.076	2.88912	-20.1286	0	0	yes
XLOC_014084	XLOC_014084	4930426D05Rik	18:21813525-21814508	FVA	AG1	OK	1.60591	0.196182	-3.03312	4.06607	4.78135e-05	0.000731719	yes
XLOC_014095	XLOC_014095	Fhod3	18:24868082-25327150	FVA	AG1	OK	7.10799	3.21583	-1.14425	4.92921	8.25636e-07	1.77403e-05	yes
XLOC_014117	XLOC_014117	Reep2	18:35000212-35012705	FVA	AG1	OK	75.84	55.2601	-0.45672	3.47184	0.000516899	0.00594683	yes
XLOC_014118	XLOC_014118	Egr1	18:35020761-35030147	FVA	AG1	OK	13.885	48.1229	1.7932	-12.8261	0	0	yes
XLOC_014119	XLOC_014119	Ctnna1	18:35278537-35414561	FVA	AG1	OK	28.2765	19.6837	-0.522601	2.98128	0.00287049	0.0253407	yes
XLOC_014125	XLOC_014125	Psd2	18:36116897-36177703	FVA	AG1	OK	13.1808	8.01481	-0.717694	4.76706	1.86931e-06	3.77997e-05	yes
XLOC_014134	XLOC_014134	Zmat2	18:36953440-36959605	FVA	AG1	OK	33.2777	55.2771	0.732125	-5.71075	1.12481e-08	3.25813e-07	yes
XLOC_014137	XLOC_014137	Pcdhb2	18:37454447-37457487	FVA	AG1	OK	1.44378	0.779519	-0.889191	3.22293	0.00126887	0.0129991	yes
XLOC_014141	XLOC_014141	Pcdhb6	18:37479823-37504986	FVA	AG1	OK	1.53168	0.724323	-1.08041	3.00073	0.00269331	0.0240098	yes
XLOC_014143	XLOC_014143	Pcdhb10,Pcdhb9	18:37560494-37576215	FVA	AG1	OK	9.52206	5.67305	-0.747149	2.78104	0.00541851	0.0424604	yes
XLOC_014150	XLOC_014150	3222401L13Rik	18:37815382-37818340	FVA	AG1	OK	0.93261	0.481006	-0.95522	2.92423	0.00345306	0.0294	yes
XLOC_014154	XLOC_014154	2010320O07Rik	18:38387549-38388875	FVA	AG1	OK	0.105808	1.06869	3.33632	-3.95834	7.54712e-05	0.001086	yes
XLOC_014165	XLOC_014165	Dcp2	18:44540187-44585760	FVA	AG1	OK	10.4834	6.93657	-0.595811	4.606	4.10484e-06	7.81344e-05	yes
XLOC_014166	XLOC_014166	A930012L18Rik,Mcc	18:44585830-44833021	FVA	AG1	OK	0.4311	0.934499	1.11617	-3.46478	0.000530672	0.00607735	yes
XLOC_014174	XLOC_014174	Tnfaip8	18:50139167-50251556	FVA	AG1	OK	7.75968	3.47908	-1.15729	4.96604	6.83327e-07	1.49368e-05	yes
XLOC_014185	XLOC_014185	-	18:54771458-54806253	FVA	AG1	OK	1.39172	0.532184	-1.38687	6.42817	1.29146e-10	4.80188e-09	yes
XLOC_014192	XLOC_014192	4930511M06Rik	18:57564921-57589657	FVA	AG1	OK	13.8671	3.89062	-1.83359	5.5713	2.52846e-08	6.98787e-07	yes
XLOC_014193	XLOC_014193	Ctxn3	18:57628079-57637787	FVA	AG1	OK	9.181	0.715649	-3.68133	10.5107	0	0	yes
XLOC_014196	XLOC_014196	Isoc1	18:58819207-58840023	FVA	AG1	OK	10.8601	6.2279	-0.802223	5.11111	3.20272e-07	7.42925e-06	yes
XLOC_014197	XLOC_014197	Adamts19	18:59127274-59213287	FVA	AG1	OK	2.99434	0	-1.79769e+308	-1.79769e+308	0.00192697	0.0183086	yes
XLOC_014198	XLOC_014198	A730017C20Rik	18:59221799-59236863	FVA	AG1	OK	34.7449	18.3755	-0.919013	4.45978	8.2044e-06	0.000146786	yes
XLOC_014202	XLOC_014202	Rbm22	18:60720118-60732456	FVA	AG1	OK	10.7856	18.6452	0.789695	-3.83903	0.000123522	0.00169175	yes
XLOC_014207	XLOC_014207	Camk2a	18:61084900-61147942	FVA	AG1	OK	179.183	850.234	2.24643	-11.923	0	0	yes
XLOC_014211	XLOC_014211	Csnk1a1	18:61714782-61753270	FVA	AG1	OK	23.7608	39.1608	0.720826	-4.01934	5.83616e-05	0.000870009	yes
XLOC_014214	XLOC_014214	Htr4	18:62483663-62657668	FVA	AG1	OK	1.76131	4.31529	1.29281	-4.26177	2.02816e-05	0.00033422	yes
XLOC_014216	XLOC_014216	Apcdd1	18:63082209-63113498	FVA	AG1	OK	5.58033	11.2686	1.01389	-4.7702	1.84039e-06	3.72881e-05	yes
XLOC_014218	XLOC_014218	Wdr7	18:63868294-64149454	FVA	AG1	OK	24.7597	31.5869	0.351329	-2.78076	0.00542315	0.0424859	yes
XLOC_014219	XLOC_014219	St8sia3	18:64424535-64439333	FVA	AG1	OK	10.7513	14.5666	0.438161	-3.4676	0.000525135	0.00602063	yes
XLOC_014221	XLOC_014221	Nedd4l	18:65047577-65377564	FVA	AG1	OK	11.3217	24.9085	1.13755	-6.27868	3.41467e-10	1.20717e-08	yes
XLOC_014226	XLOC_014226	Grp	18:66032423-66046454	FVA	AG1	OK	1.5226	14.5037	3.25181	-9.56812	0	0	yes
XLOC_014227	XLOC_014227	Pmaip1	18:66618266-66625199	FVA	AG1	OK	1.19116	0.341185	-1.80373	4.87777	1.0729e-06	2.25821e-05	yes
XLOC_014228	XLOC_014228	Gnal	18:67247934-67386744	FVA	AG1	OK	42.8577	20.404	-1.0707	4.45817	8.26611e-06	0.000147805	yes
XLOC_014231	XLOC_014231	Cidea	18:67503106-67527501	FVA	AG1	OK	1.96559	4.2297	1.10559	-3.97316	7.09249e-05	0.00102836	yes
XLOC_014233	XLOC_014233	Slmo1	18:67624475-67640327	FVA	AG1	OK	8.93667	15.3807	0.783315	-4.02648	5.66174e-05	0.000849206	yes
XLOC_014236	XLOC_014236	Cep192	18:67982960-68044810	FVA	AG1	OK	1.34023	0.365346	-1.87515	2.98624	0.00282433	0.0249975	yes
XLOC_014239	XLOC_014239	Tcf4	18:69504141-69848736	FVA	AG1	OK	19.0481	64.8928	1.76841	-3.10371	0.00191113	0.0181917	yes
XLOC_014242	XLOC_014242	Mex3c	18:73732940-73752227	FVA	AG1	OK	7.17708	11.5842	0.690691	-4.41664	1.00248e-05	0.000176393	yes
XLOC_014248	XLOC_014248	Myo5b	18:74729416-74933966	FVA	AG1	OK	4.2607	21.4005	2.32848	-11.0953	0	0	yes
XLOC_014254	XLOC_014254	Zbtb7c	18:76305680-76307919	FVA	AG1	OK	2.26552	0.510413	-2.15011	5.55501	2.7759e-08	7.62399e-07	yes
XLOC_014255	XLOC_014255	Smad2	18:76401557-76471511	FVA	AG1	OK	5.06062	3.28533	-0.623278	4.27285	1.92991e-05	0.00031905	yes
XLOC_014258	XLOC_014258	St8sia5	18:77424574-77500839	FVA	AG1	OK	3.4236	7.23542	1.07956	-6.30167	2.94449e-10	1.04453e-08	yes
XLOC_014264	XLOC_014264	Pqlc1	18:80452975-80519378	FVA	AG1	OK	4.52098	7.13821	0.658926	-3.95339	7.70529e-05	0.00110631	yes
XLOC_014265	XLOC_014265	Mbp	18:82644551-82755031	FVA	AG1	OK	1295.8	819.33	-0.661331	3.39893	0.000676505	0.00752436	yes
XLOC_014272	XLOC_014272	Neto1	18:86555128-86676909	FVA	AG1	OK	2.99393	15.7826	2.39822	-12.6272	0	0	yes
XLOC_014273	XLOC_014273	Cbln2	18:86880169-86890461	FVA	AG1	OK	7.90501	1.44294	-2.45376	10.7548	0	0	yes
XLOC_014284	XLOC_014284	Kif5b	18:6199825-6241582	FVA	AG1	OK	45.3169	32.5948	-0.47541	3.7236	0.000196403	0.00256811	yes
XLOC_014288	XLOC_014288	Mpp7	18:7349512-7513055	FVA	AG1	OK	2.44377	0.910932	-1.4237	4.10949	3.96536e-05	0.000616306	yes
XLOC_014289	XLOC_014289	Ccny	18:9311930-9450143	FVA	AG1	OK	13.2787	20.3607	0.616679	-4.77798	1.77062e-06	3.59925e-05	yes
XLOC_014293	XLOC_014293	Abhd3	18:10644364-10707027	FVA	AG1	OK	30.7238	21.8467	-0.491941	2.91537	0.00355267	0.030082	yes
XLOC_014297	XLOC_014297	Osbpl1a	18:12908967-13100218	FVA	AG1	OK	33.6087	22.8903	-0.554097	3.47096	0.000518604	0.00596125	yes
XLOC_014299	XLOC_014299	Ss18	18:14805338-14841286	FVA	AG1	OK	8.61053	13.4623	0.644753	-3.6078	0.000308806	0.0038105	yes
XLOC_014300	XLOC_014300	Kctd1	18:15127093-15310601	FVA	AG1	OK	6.17751	11.3914	0.882853	-4.02026	5.8134e-05	0.000867322	yes
XLOC_014305	XLOC_014305	Dsc3	18:20124312-20130041	FVA	AG1	OK	0.137984	0.526667	1.93239	-3.55278	0.000381177	0.00456227	yes
XLOC_014310	XLOC_014310	Klhl14	18:21709278-21724075	FVA	AG1	OK	1.14399	0.217791	-2.39306	5.31908	1.04291e-07	2.61344e-06	yes
XLOC_014311	XLOC_014311	Nol4	18:22851566-23200283	FVA	AG1	OK	10.1885	16.3855	0.685482	-3.79698	0.000146467	0.00197536	yes
XLOC_014315	XLOC_014315	Rprd1a	18:24643414-24688700	FVA	AG1	OK	23.9304	34.6704	0.534861	-3.49313	0.000477387	0.00555358	yes
XLOC_014319	XLOC_014319	Celf4	18:25636089-25912737	FVA	AG1	OK	73.6779	104.293	0.501339	-3.35134	0.000804213	0.00873412	yes
XLOC_014322	XLOC_014322	Rit2	18:31133658-31476956	FVA	AG1	OK	72.6285	27.6632	-1.39257	9.40693	0	0	yes
XLOC_014330	XLOC_014330	Stard4	18:33358804-33373603	FVA	AG1	OK	7.20754	3.89395	-0.888273	4.95255	7.32482e-07	1.59046e-05	yes
XLOC_014331	XLOC_014331	D0H4S114	18:33596670-33623557	FVA	AG1	OK	19.8243	26.7235	0.430839	-2.87189	0.00408027	0.0335745	yes
XLOC_014361	XLOC_014361	Diap1	18:38003154-38048887	FVA	AG1	OK	5.24965	9.86095	0.909506	-5.17806	2.24203e-07	5.36593e-06	yes
XLOC_014364	XLOC_014364	Pcdh1	18:38345361-38371591	FVA	AG1	OK	19.2657	53.4337	1.47171	-9.59726	0	0	yes
XLOC_014368	XLOC_014368	Fgf1	18:38998267-39078372	FVA	AG1	OK	25.0913	11.6959	-1.10119	8.0912	6.66134e-16	4.06763e-14	yes
XLOC_014374	XLOC_014374	Gpr151	18:42737418-42739525	FVA	AG1	OK	11.6445	0.344097	-5.08068	14.0143	0	0	yes
XLOC_014385	XLOC_014385	Ccdc112	18:46441609-46471553	FVA	AG1	OK	2.08836	4.48091	1.10142	-5.22177	1.77224e-07	4.31511e-06	yes
XLOC_014387	XLOC_014387	Fem1c	18:46661305-46685605	FVA	AG1	OK	8.6374	4.80522	-0.845995	5.79668	6.76416e-09	2.04101e-07	yes
XLOC_014390	XLOC_014390	Atg12	18:46891671-46901481	FVA	AG1	OK	13.7807	18.1645	0.39848	-2.79742	0.00515125	0.0407171	yes
XLOC_014391	XLOC_014391	Sema6a	18:47404908-47528572	FVA	AG1	OK	12.6771	7.36915	-0.782651	4.12542	3.7006e-05	0.00057865	yes
XLOC_014399	XLOC_014399	March3	18:56934803-57085124	FVA	AG1	OK	3.42855	1.78052	-0.945299	3.69619	0.00021886	0.00283061	yes
XLOC_014401	XLOC_014401	Fbn2	18:58349928-58369480	FVA	AG1	OK	0.616466	1.59976	1.37577	-4.36132	1.2928e-05	0.000221793	yes
XLOC_014402	XLOC_014402	2010002N04Rik	18:60633844-60661238	FVA	AG1	OK	2.70879	5.56993	1.04001	-3.51574	0.000438525	0.0051637	yes
XLOC_014403	XLOC_014403	Synpo	18:60759268-60784012	FVA	AG1	OK	0.707834	1.3643	0.94668	-2.89533	0.00378762	0.0317498	yes
XLOC_014410	XLOC_014410	Arhgef37	18:61653239-61664247	FVA	AG1	OK	1.75396	0.46649	-1.9107	3.43137	0.00060054	0.00678694	yes
XLOC_014426	XLOC_014426	Ccbe1	18:66216521-66452307	FVA	AG1	OK	0.584245	4.60655	2.97904	-12.6254	0	0	yes
XLOC_014427	XLOC_014427	Mc4r	18:67001962-67020195	FVA	AG1	OK	0.923268	1.93355	1.06643	-2.94654	0.00321349	0.0277115	yes
XLOC_014438	XLOC_014438	Dcc	18:71413282-72114731	FVA	AG1	OK	1.88893	0.624025	-1.5979	2.9759	0.00292134	0.0256431	yes
XLOC_014439	XLOC_014439	Smad4	18:73794383-73863132	FVA	AG1	OK	7.83405	10.9214	0.479329	-3.48208	0.00049754	0.00576416	yes
XLOC_014441	XLOC_014441	Me2	18:73924613-73975075	FVA	AG1	OK	5.47662	4.0026	-0.452351	3.0603	0.00221112	0.0205101	yes
XLOC_014445	XLOC_014445	Lipg	18:75099483-75117019	FVA	AG1	OK	0.200908	0.602579	1.58461	-3.57926	0.000344572	0.00419487	yes
XLOC_014447	XLOC_014447	Ctif	18:75590873-75857403	FVA	AG1	OK	23.6555	15.8701	-0.575871	4.44988	8.59168e-06	0.00015336	yes
XLOC_014454	XLOC_014454	Setbp1	18:78947035-79305993	FVA	AG1	OK	2.19955	4.53984	1.04544	-6.6075	3.9087e-11	1.55833e-09	yes
XLOC_014458	XLOC_014458	Kcng2	18:80452975-80519378	FVA	AG1	OK	0.214035	1.40626	2.71594	-5.4538	4.9306e-08	1.30881e-06	yes
XLOC_014464	XLOC_014464	Galr1	18:82559052-82571237	FVA	AG1	OK	1.44783	0.153332	-3.23917	3.43813	0.000585753	0.00664168	yes
XLOC_014473	XLOC_014473	Socs6	18:89034570-89056719	FVA	AG1	OK	5.52185	2.98575	-0.887058	4.93961	7.82782e-07	1.69017e-05	yes
XLOC_014474	XLOC_014474	Dok6	18:89459816-89938839	FVA	AG1	OK	5.71063	8.34937	0.548017	-4.06073	4.89203e-05	0.000745335	yes
XLOC_014487	XLOC_014487	-	18:3447076-3447235	FVA	AG1	OK	291.088	486.906	0.74219	-2.99302	0.00276231	0.0245258	yes
XLOC_014501	XLOC_014501	-	18:5445173-5445863	FVA	AG1	OK	0.697443	0	-1.79769e+308	-1.79769e+308	0.00142984	0.0143252	yes
XLOC_014513	XLOC_014513	Arhgap12	18:6014257-6024032	FVA	AG1	OK	0.647435	1.10199	0.767303	-3.60398	0.000313384	0.00385928	yes
XLOC_014626	XLOC_014626	-	18:21652211-21652270	FVA	AG1	OK	17812.1	7299.58	-1.28697	2.85677	0.00427978	0.0349434	yes
XLOC_014645	XLOC_014645	-	18:24580767-24584460	FVA	AG1	OK	0.253759	0.59069	1.21894	-3.25817	0.00112135	0.0116736	yes
XLOC_014646	XLOC_014646	Mir187	18:24584537-24586457	FVA	AG1	OK	0.213644	0.644061	1.59199	-3.01319	0.00258514	0.0232264	yes
XLOC_014658	XLOC_014658	-	18:25929580-25930147	FVA	AG1	OK	0.692401	0	-1.79769e+308	-1.79769e+308	0.00458232	0.0368998	yes
XLOC_014678	XLOC_014678	-	18:30430040-30431157	FVA	AG1	OK	3.36915	1.62413	-1.05271	3.39507	0.00068611	0.007612	yes
XLOC_014724	XLOC_014724	-	18:35091799-35094352	FVA	AG1	OK	0.674267	1.30289	0.950324	-3.0583	0.00222596	0.0206292	yes
XLOC_014741	XLOC_014741	Pura	18:36443925-36445826	FVA	AG1	OK	0.672787	0.253744	-1.40677	2.77749	0.00547799	0.0428395	yes
XLOC_014796	XLOC_014796	2010320O07Rik	18:38385444-38387377	FVA	AG1	OK	0.0883333	0.811518	3.19959	-4.28357	1.83916e-05	0.000306177	yes
XLOC_014806	XLOC_014806	Arhgap26	18:39133660-39135439	FVA	AG1	OK	0.629985	0.163709	-1.94419	3.16043	0.00157539	0.0154922	yes
XLOC_014896	XLOC_014896	Synpo	18:60756440-60759204	FVA	AG1	OK	0.0515335	0.492117	3.25542	-4.06138	4.8784e-05	0.000743992	yes
XLOC_014908	XLOC_014908	Arhgef37	18:61651246-61653108	FVA	AG1	OK	1.47312	0.435066	-1.75957	4.46096	8.1592e-06	0.000146062	yes
XLOC_014911	XLOC_014911	-	18:61755068-61757527	FVA	AG1	OK	0.0896027	0.524645	2.54973	-3.8284	0.000128977	0.00175866	yes
XLOC_014921	XLOC_014921	Fbxo38	18:62657843-62662750	FVA	AG1	OK	1.12494	1.94653	0.79105	-3.55754	0.000374344	0.00449358	yes
XLOC_014935	XLOC_014935	-	18:65044876-65047106	FVA	AG1	OK	0.21422	0.566053	1.40184	-2.83324	0.00460781	0.037076	yes
XLOC_014984	XLOC_014984	-	18:68914538-68915440	FVA	AG1	OK	0.118309	0.83302	2.81579	-2.73558	0.00622704	0.047521	yes
XLOC_014998	XLOC_014998	Dcc	18:72376124-72377471	FVA	AG1	OK	0.335356	1.74715	2.38124	-4.86039	1.17152e-06	2.44579e-05	yes
XLOC_014999	XLOC_014999	Dcc	18:72377583-72379138	FVA	AG1	OK	0.426005	2.28648	2.42419	-5.85196	4.85826e-09	1.49215e-07	yes
XLOC_015000	XLOC_015000	Dcc	18:72379557-72382683	FVA	AG1	OK	0.264498	1.62135	2.61587	-7.15945	8.10019e-13	3.82106e-11	yes
XLOC_015012	XLOC_015012	-	18:76875542-76876089	FVA	AG1	OK	19.287	31.5402	0.709564	-3.37047	0.000750396	0.00821205	yes
XLOC_015017	XLOC_015017	Pias2	18:77395343-77398069	FVA	AG1	OK	0.667483	0.226546	-1.55893	3.53014	0.000415336	0.00492065	yes
XLOC_015021	XLOC_015021	-	18:77500932-77503207	FVA	AG1	OK	0.705044	1.95235	1.46942	-4.75147	2.01947e-06	4.06498e-05	yes
XLOC_015022	XLOC_015022	-	18:77509512-77511634	FVA	AG1	OK	0.158546	1.36627	3.10726	-5.81537	6.04981e-09	1.83622e-07	yes
XLOC_015036	XLOC_015036	-	18:80155669-80156911	FVA	AG1	OK	32.2832	46.3355	0.521331	-3.54996	0.000385289	0.00460706	yes
XLOC_015057	XLOC_015057	-	18:82556096-82556839	FVA	AG1	OK	1.35661	0.10782	-3.6533	3.10617	0.0018953	0.0180688	yes
XLOC_015058	XLOC_015058	-	18:82556925-82558904	FVA	AG1	OK	1.21972	0.113912	-3.42056	5.27637	1.31768e-07	3.24411e-06	yes
XLOC_015083	XLOC_015083	-	18:88020880-88021428	FVA	AG1	OK	16.6601	7.45461	-1.16019	4.50208	6.72925e-06	0.000122667	yes
XLOC_015097	XLOC_015097	Aldh3b2	19:3965268-3981712	FVA	AG1	OK	2.43621	0.542583	-2.16672	4.88384	1.04039e-06	2.19878e-05	yes
XLOC_015101	XLOC_015101	Pitpnm1	19:4100024-4125936	FVA	AG1	OK	40.9116	27.1743	-0.590266	3.03835	0.00237876	0.021726	yes
XLOC_015109	XLOC_015109	Pcx	19:4510452-4622048	FVA	AG1	OK	22.4872	14.837	-0.599905	4.09251	4.26726e-05	0.000659579	yes
XLOC_015110	XLOC_015110	Spnb3	19:4710996-4755111	FVA	AG1	OK	33.3063	107.496	1.69042	-11.7459	0	0	yes
XLOC_015118	XLOC_015118	Yif1a	19:5088459-5107124	FVA	AG1	OK	3.59441	10.4489	1.53952	-4.45679	8.31971e-06	0.000148677	yes
XLOC_015119	XLOC_015119	Gal3st3	19:5298021-5308740	FVA	AG1	OK	5.23345	17.7137	1.75903	-10.2698	0	0	yes
XLOC_015124	XLOC_015124	Fosl1	19:5449817-5457648	FVA	AG1	OK	8.30933	11.5411	0.47398	-2.96815	0.00299597	0.0261422	yes
XLOC_015128	XLOC_015128	Ovol1	19:5510805-5550366	FVA	AG1	OK	2.61022	1.33757	-0.964554	4.07087	4.6837e-05	0.000718912	yes
XLOC_015142	XLOC_015142	Ehd1	19:6276845-6300309	FVA	AG1	OK	9.2398	23.2312	1.33013	-8.98416	0	0	yes
XLOC_015145	XLOC_015145	Map4k2	19:6341230-6356467	FVA	AG1	OK	22.8283	15.6549	-0.544215	3.64	0.000272636	0.00342714	yes
XLOC_015147	XLOC_015147	Pygm	19:6384308-6398454	FVA	AG1	OK	20.8232	8.21306	-1.3422	7.15439	8.40439e-13	3.95249e-11	yes
XLOC_015148	XLOC_015148	Rasgrp2	19:6399901-6415214	FVA	AG1	OK	16.6841	5.51759	-1.59636	6.80618	1.00222e-11	4.21314e-10	yes
XLOC_015158	XLOC_015158	Pla2g16	19:7631912-7663127	FVA	AG1	OK	13.9556	7.84081	-0.83177	4.49487	6.9614e-06	0.000126675	yes
XLOC_015159	XLOC_015159	Gm16437	19:7742816-7743650	FVA	AG1	OK	43.6147	29.9001	-0.544667	3.38078	0.000722799	0.0079477	yes
XLOC_015162	XLOC_015162	Slc22a6	19:8701703-8702801	FVA	AG1	OK	0.470246	1.58755	1.75531	-4.93479	8.02368e-07	1.72884e-05	yes
XLOC_015163	XLOC_015163	Chrm1	19:8738084-8759729	FVA	AG1	OK	3.17296	31.0452	3.29047	-17.1326	0	0	yes
XLOC_015206	XLOC_015206	Gnaq	19:16207735-16463003	FVA	AG1	OK	28.216	52.2537	0.889021	-7.22138	5.14699e-13	2.45799e-11	yes
XLOC_015213	XLOC_015213	Trpm6	19:18948258-18966982	FVA	AG1	OK	2.52153	0	-1.79769e+308	-1.79769e+308	0.00197817	0.018726	yes
XLOC_015216	XLOC_015216	Aldh1a1	19:20566859-20718002	FVA	AG1	OK	43.422	21.9642	-0.983273	6.38965	1.66264e-10	6.13767e-09	yes
XLOC_015220	XLOC_015220	Gm5514	19:22011821-22013129	FVA	AG1	OK	188.378	101.407	-0.893477	7.22609	4.97158e-13	2.38158e-11	yes
XLOC_015223	XLOC_015223	Klf9	19:23214787-23242972	FVA	AG1	OK	18.7435	30.5499	0.70478	-5.59495	2.20683e-08	6.16516e-07	yes
XLOC_015226	XLOC_015226	Apba1	19:23833391-24028234	FVA	AG1	OK	28.6984	21.849	-0.3934	2.7259	0.00641272	0.0486592	yes
XLOC_015231	XLOC_015231	Dmrt3	19:25696863-25698410	FVA	AG1	OK	0.074946	0.503769	2.74884	-2.93982	0.00328407	0.0282629	yes
XLOC_015245	XLOC_015245	Cstf2t	19:31157348-31161084	FVA	AG1	OK	17.9103	23.3677	0.383728	-2.88436	0.00392214	0.0326295	yes
XLOC_015248	XLOC_015248	Papss2	19:32670341-32741714	FVA	AG1	OK	2.96	4.40217	0.572618	-2.97449	0.00293472	0.0257459	yes
XLOC_015249	XLOC_015249	Pten	19:32832010-32900685	FVA	AG1	OK	15.453	21.3633	0.467245	-3.35641	0.000789615	0.00859977	yes
XLOC_015254	XLOC_015254	Ifit2	19:34625091-34651012	FVA	AG1	OK	3.51869	1.91406	-0.878408	3.21798	0.00129095	0.0131773	yes
XLOC_015255	XLOC_015255	I830012O16Rik,Ifit3	19:34657797-34736922	FVA	AG1	OK	9.32971	4.01586	-1.21612	4.95362	7.28445e-07	1.5828e-05	yes
XLOC_015257	XLOC_015257	Pcgf5	19:36423015-36535448	FVA	AG1	OK	5.19596	2.89016	-0.846241	4.50627	6.59765e-06	0.000120552	yes
XLOC_015258	XLOC_015258	Hectd2	19:36629308-36695564	FVA	AG1	OK	3.67893	8.57218	1.22038	-4.89304	9.92914e-07	2.10853e-05	yes
XLOC_015259	XLOC_015259	Tnks2	19:36909072-36967968	FVA	AG1	OK	17.857	27.0709	0.600257	-4.4438	8.83836e-06	0.000157218	yes
XLOC_015260	XLOC_015260	Btaf1	19:37000817-37090496	FVA	AG1	OK	5.75481	12.4748	1.11618	-5.86834	4.40185e-09	1.35872e-07	yes
XLOC_015264	XLOC_015264	Exoc6	19:37624917-37758570	FVA	AG1	OK	5.29794	11.3153	1.09477	-6.47615	9.40943e-11	3.5629e-09	yes
XLOC_015266	XLOC_015266	Lgi1	19:38379938-38386701	FVA	AG1	OK	3.68136	9.57458	1.37897	-8.05629	8.88178e-16	5.38097e-14	yes
XLOC_015269	XLOC_015269	Plce1	19:38555750-38858702	FVA	AG1	OK	2.65655	1.27671	-1.05712	4.42658	9.57376e-06	0.000169228	yes
XLOC_015285	XLOC_015285	Golga7b	19:42330261-42345115	FVA	AG1	OK	12.0378	20.0006	0.732467	-5.02111	5.13743e-07	1.14528e-05	yes
XLOC_015295	XLOC_015295	Sema4g	19:45063736-45077895	FVA	AG1	OK	2.45862	0.234863	-3.38795	3.11299	0.00185202	0.0177713	yes
XLOC_015299	XLOC_015299	Kazald1	19:45150613-45153839	FVA	AG1	OK	4.36228	1.28529	-1.76299	4.16071	3.17266e-05	0.000502196	yes
XLOC_015317	XLOC_015317	As3mt	19:46781937-46815580	FVA	AG1	OK	8.31112	4.46347	-0.896878	3.25223	0.00114503	0.0118921	yes
XLOC_015320	XLOC_015320	Neurl1a	19:47253713-47439139	FVA	AG1	OK	14.5497	42.5114	1.54686	-3.99484	6.4738e-05	0.000952965	yes
XLOC_015328	XLOC_015328	-	19:52998691-53001516	FVA	AG1	OK	0.223295	0.726717	1.70244	-3.06423	0.00218232	0.0202795	yes
XLOC_015329	XLOC_015329	Add3	19:53214793-53321744	FVA	AG1	OK	25.9166	36.2839	0.485454	-3.06783	0.00215619	0.0201092	yes
XLOC_015332	XLOC_015332	Dusp5	19:53604056-53616891	FVA	AG1	OK	3.99912	9.20821	1.20324	-5.50177	3.75988e-08	1.01817e-06	yes
XLOC_015339	XLOC_015339	Acsl5	19:55327699-55371366	FVA	AG1	OK	9.2277	15.578	0.755468	-4.52556	6.02344e-06	0.000110913	yes
XLOC_015341	XLOC_015341	Tcf7l2	19:55816309-56008146	FVA	AG1	OK	95.0964	1.53398	-5.95404	10.8767	0	0	yes
XLOC_015351	XLOC_015351	Eno4	19:59020021-59045944	FVA	AG1	OK	3.36418	1.47736	-1.18724	3.52573	0.000422323	0.00499576	yes
XLOC_015352	XLOC_015352	Slc18a2	19:59335386-59420063	FVA	AG1	OK	4.8966	0.809714	-2.5963	4.04583	5.21391e-05	0.000788929	yes
XLOC_015361	XLOC_015361	Gal	19:3409917-3414495	FVA	AG1	OK	12.3591	0.248587	-5.63568	7.34534	2.05169e-13	1.01755e-11	yes
XLOC_015372	XLOC_015372	Carns1	19:4164324-4175479	FVA	AG1	OK	6.25149	3.01016	-1.05436	3.98854	6.64822e-05	0.000973539	yes
XLOC_015378	XLOC_015378	Syt12	19:4444984-4477140	FVA	AG1	OK	4.14776	7.00357	0.755756	-4.35779	1.31382e-05	0.000225149	yes
XLOC_015387	XLOC_015387	Npas4	19:4984360-4990896	FVA	AG1	OK	2.079	4.52493	1.122	-4.06529	4.79725e-05	0.00073331	yes
XLOC_015391	XLOC_015391	Rab1b	19:5088459-5107124	FVA	AG1	OK	38.6685	78.4109	1.01989	-7.64058	2.15383e-14	1.16142e-12	yes
XLOC_015407	XLOC_015407	Malat1	19:5795574-5802675	FVA	AG1	OK	67.9851	49.5472	-0.456414	3.42784	0.0006084	0.00686823	yes
XLOC_015408	XLOC_015408	Neat1	19:5842219-5845914	FVA	AG1	OK	115.624	46.6199	-1.31042	10.5823	0	0	yes
XLOC_015409	XLOC_015409	Frmd8	19:5851121-5875255	FVA	AG1	OK	12.2417	7.50977	-0.704962	3.86565	0.000110791	0.00153715	yes
XLOC_015412	XLOC_015412	Cdc42ep2	19:5917336-5924856	FVA	AG1	OK	9.29464	4.95007	-0.908951	4.67975	2.87228e-06	5.63119e-05	yes
XLOC_015419	XLOC_015419	Arl2	19:6134248-6141738	FVA	AG1	OK	29.532	19.3785	-0.607824	3.73486	0.00018782	0.00247368	yes
XLOC_015439	XLOC_015439	-	19:8724762-8737971	FVA	AG1	OK	0.452963	2.31214	2.35176	-3.92736	8.58831e-05	0.00122118	yes
XLOC_015454	XLOC_015454	Gm98	19:10282759-10315150	FVA	AG1	OK	18.9152	12.3755	-0.612064	3.97132	7.14741e-05	0.00103438	yes
XLOC_015455	XLOC_015455	Dagla	19:10319753-10379412	FVA	AG1	OK	20.4961	37.0793	0.855266	-6.01133	1.84013e-09	6.01654e-08	yes
XLOC_015462	XLOC_015462	Tmem132a	19:10917272-10944354	FVA	AG1	OK	22.2499	40.5143	0.864629	-6.49101	8.5262e-11	3.2564e-09	yes
XLOC_015470	XLOC_015470	Dtx4	19:12540180-12576716	FVA	AG1	OK	8.12867	15.1239	0.895737	-4.02728	5.64248e-05	0.000847552	yes
XLOC_015473	XLOC_015473	Tle4	19:14590499-14672023	FVA	AG1	OK	9.20089	14.4893	0.65514	-3.37971	0.000725634	0.00797036	yes
XLOC_015474	XLOC_015474	Psat1	19:15979146-15992966	FVA	AG1	OK	49.8228	31.416	-0.665307	2.97026	0.00297547	0.0260071	yes
XLOC_015478	XLOC_015478	Pcsk5	19:17632642-17912044	FVA	AG1	OK	1.48609	3.24171	1.12523	-3.64443	0.00026799	0.00337974	yes
XLOC_015480	XLOC_015480	Rorb	19:19005054-19185675	FVA	AG1	OK	4.48269	2.1215	-1.07928	7.04644	1.83564e-12	8.34084e-11	yes
XLOC_015483	XLOC_015483	Gda	19:21465794-21547178	FVA	AG1	OK	10.7918	43.7064	2.01791	-14.157	0	0	yes
XLOC_015491	XLOC_015491	Fam189a2	19:24047210-24105203	FVA	AG1	OK	11.4048	3.69938	-1.62428	7.31588	2.55795e-13	1.26054e-11	yes
XLOC_015494	XLOC_015494	Pip5k1b	19:24369221-24630366	FVA	AG1	OK	7.91237	18.1757	1.19983	-6.8587	6.94889e-12	2.99451e-10	yes
XLOC_015500	XLOC_015500	Rfx3	19:27836169-28085665	FVA	AG1	OK	3.97902	13.9685	1.81169	-10.502	0	0	yes
XLOC_015501	XLOC_015501	Glis3	19:28333377-28754484	FVA	AG1	OK	1.28363	4.38502	1.77235	-5.2974	1.17464e-07	2.91518e-06	yes
XLOC_015509	XLOC_015509	Gldc	19:30172076-30249626	FVA	AG1	OK	1.80583	11.9982	2.73209	-3.05732	0.00223327	0.0206908	yes
XLOC_015511	XLOC_015511	Asah2	19:32058529-32177704	FVA	AG1	OK	5.59437	1.99695	-1.48617	3.36625	0.000761989	0.00831941	yes
XLOC_015517	XLOC_015517	Acta2	19:34315766-34329924	FVA	AG1	OK	8.37676	13.8611	0.726578	-4.02989	5.58033e-05	0.000840668	yes
XLOC_015525	XLOC_015525	-	19:35910752-35999068	FVA	AG1	OK	2.48527	0.452365	-2.45784	3.05064	0.00228355	0.021043	yes
XLOC_015526	XLOC_015526	Htr7	19:36032923-36131859	FVA	AG1	OK	9.62502	2.40395	-2.00138	8.68652	0	0	yes
XLOC_015529	XLOC_015529	Fgfbp3	19:36993458-36994148	FVA	AG1	OK	2.21522	4.02071	0.860002	-3.01188	0.00259636	0.0233137	yes
XLOC_015532	XLOC_015532	Myof	19:38005204-38042998	FVA	AG1	OK	0.72666	1.56747	1.10908	-3.59378	0.000325912	0.00399287	yes
XLOC_015533	XLOC_015533	Rbp4	19:38191118-38199731	FVA	AG1	OK	1.71046	7.45138	2.12312	-5.45905	4.78686e-08	1.27394e-06	yes
XLOC_015541	XLOC_015541	Blnk	19:41003361-41068716	FVA	AG1	OK	1.0272	2.0255	0.979567	-3.15677	0.00159527	0.0156578	yes
XLOC_015545	XLOC_015545	Pik3ap1	19:41376950-41450740	FVA	AG1	OK	1.27307	0.705676	-0.851233	2.75561	0.00585822	0.0452405	yes
XLOC_015546	XLOC_015546	Slit1	19:41672289-41818409	FVA	AG1	OK	14.319	48.8102	1.76926	-13.8887	0	0	yes
XLOC_015548	XLOC_015548	Frat2	19:41922188-41922606	FVA	AG1	OK	1.60291	4.34136	1.43746	-5.12759	2.93468e-07	6.87458e-06	yes
XLOC_015553	XLOC_015553	Avpi1	19:42197696-42203636	FVA	AG1	OK	14.0154	7.15807	-0.969376	4.93448	8.03625e-07	1.73034e-05	yes
XLOC_015554	XLOC_015554	Sfrp5	19:42272335-42276466	FVA	AG1	OK	3.95914	0.176653	-4.4862	8.14398	4.44089e-16	2.74429e-14	yes
XLOC_015555	XLOC_015555	Crtac1	19:42357527-42506197	FVA	AG1	OK	11.5691	38.3436	1.72871	-8.50631	0	0	yes
XLOC_015564	XLOC_015564	Erlin1	19:44109433-44144246	FVA	AG1	OK	4.49723	7.30117	0.69909	-2.87611	0.00402612	0.0332351	yes
XLOC_015568	XLOC_015568	Pkd2l1	19:44231758-44266851	FVA	AG1	OK	1.95885	0.471078	-2.05597	3.74968	0.000177061	0.00234799	yes
XLOC_015569	XLOC_015569	Scd1	19:44468913-44482396	FVA	AG1	OK	72.0128	30.3286	-1.24757	8.11669	4.44089e-16	2.74429e-14	yes
XLOC_015570	XLOC_015570	Ndufb8	19:44624467-44630017	FVA	AG1	OK	118.295	86.9836	-0.443573	3.43087	0.000601657	0.00679707	yes
XLOC_015571	XLOC_015571	Gm17704	19:44760258-44769902	FVA	AG1	OK	0.354274	8.35882	4.56036	-5.80629	6.38718e-09	1.93671e-07	yes
XLOC_015575	XLOC_015575	-	19:45374995-45377639	FVA	AG1	OK	2.28464	0.539805	-2.08145	2.88312	0.00393759	0.0327053	yes
XLOC_015581	XLOC_015581	Kcnip2	19:45866724-45891012	FVA	AG1	OK	17.1017	86.2054	2.33364	-13.2865	0	0	yes
XLOC_015584	XLOC_015584	Psd	19:46386270-46402551	FVA	AG1	OK	39.254	193.56	2.30187	-13.6474	0	0	yes
XLOC_015590	XLOC_015590	Usmg5	19:47156199-47207755	FVA	AG1	OK	11.0311	21.5759	0.967846	-3.39604	0.000683685	0.00758783	yes
XLOC_015597	XLOC_015597	Sorcs1	19:50217847-50753093	FVA	AG1	OK	7.05604	1.86146	-1.92242	10.0549	0	0	yes
XLOC_015605	XLOC_015605	Gucy2g	19:55272241-55292030	FVA	AG1	OK	0.484722	1.90193	1.97224	-4.9184	8.72554e-07	1.86705e-05	yes
XLOC_015607	XLOC_015607	Nrap	19:56411019-56415205	FVA	AG1	OK	1.11162	0.184924	-2.58765	3.08917	0.00200717	0.0189656	yes
XLOC_015621	XLOC_015621	Rab11fip2	19:59978685-60019310	FVA	AG1	OK	7.06996	11.4803	0.699391	-4.56425	5.01278e-06	9.38128e-05	yes
XLOC_015631	XLOC_015631	-	19:3205796-3206130	FVA	AG1	OK	114.383	170.32	0.574378	-3.30907	0.000936076	0.00996653	yes
XLOC_015665	XLOC_015665	Rbm4b	19:4767177-4769152	FVA	AG1	OK	1.78179	0.259797	-2.77787	6.11209	9.83331e-10	3.3025e-08	yes
XLOC_015672	XLOC_015672	Tmem151a	19:5073273-5075252	FVA	AG1	OK	1.15557	0.277255	-2.05932	4.52141	6.14289e-06	0.000112844	yes
XLOC_015736	XLOC_015736	-	19:8760603-8762675	FVA	AG1	OK	0.110036	0.691091	2.6509	-4.03377	5.48891e-05	0.000828107	yes
XLOC_015775	XLOC_015775	-	19:11839975-11840291	FVA	AG1	OK	16.2497	29.8275	0.876224	-2.94764	0.00320213	0.027629	yes
XLOC_015803	XLOC_015803	2410127L17Rik	19:18771478-18775247	FVA	AG1	OK	0.528046	0.139717	-1.91815	4.19919	2.67876e-05	0.000430413	yes
XLOC_015805	XLOC_015805	2410127L17Rik	19:18780331-18781686	FVA	AG1	OK	1.3809	2.62002	0.923973	-2.96237	0.00305282	0.026548	yes
XLOC_015899	XLOC_015899	-	19:37309610-37312191	FVA	AG1	OK	0.0759409	3.16371	5.38059	-8.08262	6.66134e-16	4.06763e-14	yes
[truncated: 2,096 more rows]

## Sheet: PL vs CC
test_id	gene_id	gene	locus	sample_1	sample_2	status	value_1	value_2	log2(fold_change)	test_stat	p_value	q_value	significant
XLOC_000743	XLOC_000743	Cdh19	1:112784691-112874204	EPL	DCC	OK	1.42269	2.18206	0.617063	-4.15275	3.28505e-05	0.0128562	yes
XLOC_000270	XLOC_000270	Cntnap5a	1:117581133-118483887	EPL	DCC	OK	3.71444	2.96881	-0.323262	3.83503	0.000125549	0.0384318	yes
XLOC_000796	XLOC_000796	Prelp	1:135806851-135817995	EPL	DCC	OK	6.08106	7.90106	0.377722	-4.09779	4.17115e-05	0.0149953	yes
XLOC_000320	XLOC_000320	Fmod	1:135933969-135944800	EPL	DCC	OK	1.59015	3.05801	0.94343	-5.71296	1.11031e-08	1.10733e-05	yes
XLOC_000830	XLOC_000830	Prg4	1:152299364-152312726	EPL	DCC	OK	0.316975	1.44047	2.1841	-6.55574	5.53679e-11	1.00695e-07	yes
XLOC_000891	XLOC_000891	7SK	1:167423109-167429302	EPL	DCC	OK	0.721763	0.405091	-0.833279	3.82046	0.000133204	0.0403751	yes
XLOC_000421	XLOC_000421	Adamts4	1:173178688-173192394	EPL	DCC	OK	5.36766	3.67278	-0.547423	6.52496	6.80209e-11	1.10684e-07	yes
XLOC_000998	XLOC_000998	Hsd11b1	1:195047846-195090300	EPL	DCC	OK	19.23	12.7018	-0.598327	3.98935	6.62545e-05	0.0217914	yes
XLOC_000030	XLOC_000030	Paqr8	1:20878743-20932635	EPL	DCC	OK	16.2009	20.3208	0.326886	-4.42357	9.70812e-06	0.00454767	yes
XLOC_000658	XLOC_000658	Igfbp5	1:72904506-72921559	EPL	DCC	OK	31.9316	23.5154	-0.441379	6.88586	5.74385e-12	1.26845e-08	yes
XLOC_002754	XLOC_002754	Lyz2	10:116714393-116728250	EPL	DCC	OK	6.33545	10.0857	0.670784	-4.32884	1.49898e-05	0.00652733	yes
XLOC_002057	XLOC_002057	D10Bwg1379e	10:18299938-18463830	EPL	DCC	OK	1.91193	0.365485	-2.38715	4.40054	1.07982e-05	0.00490954	yes
XLOC_002067	XLOC_002067	Sgk1	10:21601862-21719710	EPL	DCC	OK	17.8486	25.1624	0.495455	-4.62834	3.68603e-06	0.00201876	yes
XLOC_002075	XLOC_002075	Epb4.1l2	10:25079693-25243319	EPL	DCC	OK	18.5279	14.3536	-0.368292	3.81203	0.000137831	0.041372	yes
XLOC_002133	XLOC_002133	Fabp7	10:57504600-57508294	EPL	DCC	OK	34.8048	14.728	-1.24072	11.2806	0	0	yes
XLOC_004115	XLOC_004115	Cnp	11:100436237-100482574	EPL	DCC	OK	14.1605	10.6629	-0.409266	4.12382	3.72648e-05	0.0140502	yes
XLOC_004170	XLOC_004170	Ace	11:105829288-105851266	EPL	DCC	OK	1.69545	2.6292	0.632951	-4.83891	1.30552e-06	0.000807253	yes
XLOC_005839	XLOC_005839	-	11:108872953-108873421	EPL	DCC	OK	46.7894	67.7231	0.533466	-4.91518	8.87027e-07	0.000559678	yes
XLOC_004201	XLOC_004201	Ttyh2	11:114536781-114582359	EPL	DCC	OK	7.83594	6.04712	-0.373859	3.99908	6.35887e-05	0.0211395	yes
XLOC_004913	XLOC_004913	Timp2	11:118162372-118216824	EPL	DCC	OK	53.2997	64.7792	0.281401	-4.45707	8.30865e-06	0.00395198	yes
XLOC_004247	XLOC_004247	Gaa	11:119129191-119146859	EPL	DCC	OK	73.6568	89.8419	0.28657	-3.95442	7.67203e-05	0.0242424	yes
XLOC_004287	XLOC_004287	Inpp5j	11:3315766-3405415	EPL	DCC	OK	13.0081	16.9636	0.383028	-4.25678	2.07396e-05	0.00854942	yes
XLOC_004464	XLOC_004464	Sparc	11:55207294-55233718	EPL	DCC	OK	72.6208	101.513	0.483214	-6.01789	1.76703e-09	2.10121e-06	yes
XLOC_003975	XLOC_003975	Aldoc	11:78136261-78141517	EPL	DCC	OK	186.583	240.126	0.363969	-5.68596	1.30083e-08	1.25681e-05	yes
XLOC_004638	XLOC_004638	Ksr1	11:78826934-78960086	EPL	DCC	OK	28.8689	38.4766	0.414462	-4.49373	6.9986e-06	0.00343454	yes
XLOC_006299	XLOC_006299	4930427A07Rik	12:114394889-114403682	EPL	DCC	OK	1.89729	0.267366	-2.82705	8.46949	0	0	yes
XLOC_006378	XLOC_006378	Stxbp6	12:45953378-46175693	EPL	DCC	OK	24.9123	18.6254	-0.419583	5.88615	3.95296e-09	4.36478e-06	yes
XLOC_006632	XLOC_006632	-	12:5649851-5650009	EPL	DCC	OK	232.467	441.986	0.926972	-4.53834	5.66998e-06	0.00287375	yes
XLOC_006441	XLOC_006441	-	12:75905158-75905265	EPL	DCC	OK	53169.8	0	-1.79769e+308	-1.79769e+308	9.27534e-09	9.55886e-06	yes
XLOC_006151	XLOC_006151	Plekhh1	12:80130255-80190701	EPL	DCC	OK	5.54556	4.14503	-0.419951	4.62634	3.72187e-06	0.00201876	yes
XLOC_007902	XLOC_007902	Erbb2ip	13:104608863-104710699	EPL	DCC	OK	12.5797	9.46315	-0.410705	3.94409	8.01041e-05	0.0250159	yes
XLOC_007695	XLOC_007695	Serpinb1a	13:32933998-32990008	EPL	DCC	OK	4.73364	1.65668	-1.51465	6.07161	1.26631e-09	1.57061e-06	yes
XLOC_007566	XLOC_007566	Serinc5	13:93381046-93481906	EPL	DCC	OK	16.9534	13.8676	-0.289856	4.04061	5.33119e-05	0.0183138	yes
XLOC_009026	XLOC_009026	Ndrg2	14:52524785-52533853	EPL	DCC	OK	229.192	276.823	0.272408	-3.95404	7.68429e-05	0.0242424	yes
XLOC_009075	XLOC_009075	Gjb6	14:57742086-57752560	EPL	DCC	OK	21.7965	28.3327	0.378373	-3.79586	0.000147134	0.0429147	yes
XLOC_008792	XLOC_008792	Spata13	14:61253590-61383393	EPL	DCC	OK	3.32979	2.39514	-0.475317	4.03306	5.50556e-05	0.0185017	yes
XLOC_009909	XLOC_009909	Cdh9	15:16658334-16786962	EPL	DCC	OK	13.3776	9.52668	-0.489777	4.11753	3.82949e-05	0.0140948	yes
XLOC_009884	XLOC_009884	Sepp1	15:3220711-3230849	EPL	DCC	OK	52.297	61.9499	0.244373	-3.7636	0.000167485	0.0479458	yes
XLOC_010279	XLOC_010279	Fbxo32	15:58007439-58046486	EPL	DCC	OK	2.44111	1.74973	-0.480406	4.29574	1.74108e-05	0.00747624	yes
XLOC_010286	XLOC_010286	Fam84b	15:60650637-60661857	EPL	DCC	OK	3.16831	2.08036	-0.606885	3.79727	0.000146296	0.0429147	yes
XLOC_010867	XLOC_010867	Apol7e	15:77532728-77532933	EPL	DCC	OK	65.6858	7.76133	-3.0812	5.47394	4.40143e-08	3.58103e-05	yes
XLOC_011546	XLOC_011546	Emp2	16:10281808-10314027	EPL	DCC	OK	7.06106	4.95513	-0.510962	5.06469	4.09067e-07	0.000301122	yes
XLOC_011464	XLOC_011464	Vgll3	16:65828218-65866609	EPL	DCC	OK	0.191512	0.568026	1.56852	-5.46485	4.63308e-08	3.67285e-05	yes
XLOC_012939	XLOC_012939	Fkbp5	17:28535737-28622953	EPL	DCC	OK	13.9768	19.6604	0.492261	-6.67401	2.48912e-11	5.13041e-08	yes
XLOC_012810	XLOC_012810	Pisd-ps2	17:3059961-3084696	EPL	DCC	OK	32.367	42.2239	0.383538	-4.64973	3.32368e-06	0.00186833	yes
XLOC_012591	XLOC_012591	Col11a2	17:34176000-34203627	EPL	DCC	OK	5.95032	4.32484	-0.460322	3.7712	0.000162467	0.0469439	yes
XLOC_012996	XLOC_012996	Hspa1b	17:35093377-35096424	EPL	DCC	OK	8.71956	12.9246	0.567793	-6.5587	5.4277e-11	1.00695e-07	yes
XLOC_013036	XLOC_013036	Mog	17:37138835-37160394	EPL	DCC	OK	18.72	13.1152	-0.513337	5.80156	6.57012e-09	7.00442e-06	yes
XLOC_014301	XLOC_014301	Aqp4	18:15547908-15562320	EPL	DCC	OK	27.9305	18.6316	-0.58409	7.99879	1.33227e-15	6.86495e-12	yes
XLOC_014081	XLOC_014081	Ttr	18:20818884-20832827	EPL	DCC	OK	68.9603	134.609	0.964938	-10.755	0	0	yes
XLOC_014265	XLOC_014265	Mbp	18:82644551-82755031	EPL	DCC	OK	774.684	568.255	-0.447068	5.2613	1.43039e-07	0.000107862	yes
XLOC_017215	XLOC_017215	Ano3	2:110495346-110790675	EPL	DCC	OK	23.6338	19.9214	-0.246535	3.79772	0.000146033	0.0429147	yes
XLOC_017295	XLOC_017295	Mal	2:127458876-127482109	EPL	DCC	OK	87.7091	72.8346	-0.268103	4.22125	2.42953e-05	0.0098834	yes
XLOC_017447	XLOC_017447	Sdc4	2:164249668-164268747	EPL	DCC	OK	13.7082	18.6284	0.442461	-5.48946	4.03164e-08	3.42444e-05	yes
XLOC_016935	XLOC_016935	Ptgds	2:25322004-25325559	EPL	DCC	OK	216.954	288.593	0.411649	-5.48657	4.09821e-08	3.42444e-05	yes
XLOC_016991	XLOC_016991	Fibcd1	2:31668540-31702184	EPL	DCC	OK	17.6329	21.3799	0.277986	-4.16004	3.18196e-05	0.0126124	yes
XLOC_016998	XLOC_016998	Lcn2	2:32240155-32243278	EPL	DCC	OK	2.0683	6.35654	1.6198	-6.07114	1.27002e-09	1.57061e-06	yes
XLOC_017062	XLOC_017062	Rprm	2:53936437-53938001	EPL	DCC	OK	11.4827	15.2552	0.409841	-4.08817	4.3479e-05	0.015451	yes
XLOC_017067	XLOC_017067	Ermn	2:57897336-57905442	EPL	DCC	OK	13.7025	10.1937	-0.42677	5.45905	4.7868e-08	3.69983e-05	yes
XLOC_018911	XLOC_018911	Tspan2	3:102538872-102576596	EPL	DCC	OK	25.7443	17.8311	-0.529856	7.73187	1.06581e-14	4.7074e-11	yes
XLOC_018923	XLOC_018923	Slc16a1	3:104442471-104461235	EPL	DCC	OK	9.85353	7.73874	-0.348542	3.95888	7.53034e-05	0.0242424	yes
XLOC_019383	XLOC_019383	Ugt8a	3:125563681-125641517	EPL	DCC	OK	8.99915	5.96984	-0.592098	5.58253	2.37044e-08	2.22082e-05	yes
XLOC_018992	XLOC_018992	Agxt2l1	3:130320467-130340708	EPL	DCC	OK	1.74693	6.14511	1.81462	-12.5505	0	0	yes
XLOC_018656	XLOC_018656	Car2	3:14886313-14900919	EPL	DCC	OK	79.5119	57.6471	-0.463923	6.98241	2.90168e-12	7.47593e-09	yes
XLOC_018682	XLOC_018682	Cldn11	3:31048851-31063583	EPL	DCC	OK	58.9067	46.6449	-0.336714	5.03011	4.90211e-07	0.000352462	yes
XLOC_019168	XLOC_019168	Trim59	3:68839218-68848637	EPL	DCC	OK	4.96462	3.46152	-0.52028	4.11872	3.80987e-05	0.0140948	yes
XLOC_019205	XLOC_019205	Fcrls	3:87067365-87067557	EPL	DCC	OK	8.92796	6.5413	-0.448753	4.14803	3.35342e-05	0.0129597	yes
XLOC_021291	XLOC_021291	Mfsd2a	4:122624037-122638511	EPL	DCC	OK	7.29274	10.2581	0.492229	-4.52161	6.13707e-06	0.00306032	yes
XLOC_020433	XLOC_020433	-	4:3016673-3018302	EPL	DCC	OK	24.6797	88.5506	1.84318	-4.754	1.99436e-06	0.00118576	yes
XLOC_020973	XLOC_020973	-	4:3016673-3018302	EPL	DCC	OK	81.8934	0	-1.79769e+308	-1.79769e+308	1.70537e-06	0.00103382	yes
XLOC_020974	XLOC_020974	-	4:3016673-3018302	EPL	DCC	OK	0	11777.7	1.79769e+308	1.79769e+308	2.85734e-06	0.0016668	yes
XLOC_021122	XLOC_021122	Lpar1	4:58448117-58566624	EPL	DCC	OK	7.57513	4.78083	-0.66401	5.51974	3.39496e-08	2.99892e-05	yes
XLOC_022731	XLOC_022731	Spp1	5:104864053-104870072	EPL	DCC	OK	2.46443	5.63255	1.19254	-6.42771	1.29537e-10	2.00244e-07	yes
XLOC_022737	XLOC_022737	Lrrc8c	5:105948518-106042101	EPL	DCC	OK	3.43734	4.94848	0.525692	-5.99474	2.03811e-09	2.33379e-06	yes
XLOC_023355	XLOC_023355	Aldh2	5:122015979-122043978	EPL	DCC	OK	13.7585	17.254	0.326606	-4.46118	8.15108e-06	0.00393761	yes
XLOC_022854	XLOC_022854	Setd1b	5:123583607-123618635	EPL	DCC	OK	4.67621	5.94925	0.347369	-3.8943	9.84846e-05	0.0304485	yes
XLOC_023491	XLOC_023491	Tmem130	5:145496740-145522721	EPL	DCC	OK	46.0975	55.3752	0.26455	-4.07525	4.59649e-05	0.0161488	yes
XLOC_023157	XLOC_023157	Qdpr	5:45823361-45841465	EPL	DCC	OK	40.5299	29.4257	-0.461913	6.93324	4.11315e-12	9.78203e-09	yes
XLOC_022614	XLOC_022614	Lap3	5:45884473-45905456	EPL	DCC	OK	10.2169	8.07638	-0.339172	4.06239	4.85718e-05	0.016873	yes
XLOC_025364	XLOC_025364	Lag3	6:124854416-124861791	EPL	DCC	OK	2.21876	1.07877	-1.04037	4.40337	1.06585e-05	0.00490954	yes
XLOC_025374	XLOC_025374	Cd9	6:125410281-125444829	EPL	DCC	OK	27.8657	19.5371	-0.512273	5.56842	2.57065e-08	2.33755e-05	yes
XLOC_024974	XLOC_024974	Vwf	6:125502954-125636686	EPL	DCC	OK	2.46219	3.73045	0.599406	-6.54059	6.12763e-11	1.05249e-07	yes
XLOC_025415	XLOC_025415	Mgp	6:136820955-136824399	EPL	DCC	OK	16.4759	28.857	0.808564	-6.26926	3.62759e-10	5.09792e-07	yes
XLOC_025144	XLOC_025144	Zfp398	6:47785680-47824044	EPL	DCC	OK	0.213136	0.840172	1.97891	-4.10336	4.07199e-05	0.014811	yes
XLOC_024747	XLOC_024747	Wipf3	6:54379248-54453848	EPL	DCC	OK	92.2223	115.736	0.327655	-4.27881	1.87897e-05	0.00785027	yes
XLOC_027378	XLOC_027378	Hbb-b1	7:110975050-110982005	EPL	DCC	OK	353.591	799.835	1.17762	-15.001	0	0	yes
XLOC_027107	XLOC_027107	Mag	7:31684064-31699981	EPL	DCC	OK	59.6249	43.8045	-0.444833	4.98308	6.25813e-07	0.000420614	yes
XLOC_026622	XLOC_026622	Atp10a	7:65913863-66089504	EPL	DCC	OK	0.993281	1.67947	0.757731	-4.56227	5.06027e-06	0.00265167	yes
XLOC_026695	XLOC_026695	Crebzf	7:97591682-97606013	EPL	DCC	OK	0.836157	1.58694	0.924405	-4.91671	8.80086e-07	0.000559678	yes
XLOC_029654	XLOC_029654	Fa2h	8:113869037-113917652	EPL	DCC	OK	13.5331	9.89401	-0.451869	4.9964	5.84089e-07	0.000401295	yes
XLOC_029680	XLOC_029680	Cotl1	8:122333112-122364496	EPL	DCC	OK	36.9014	45.6044	0.305497	-4.17147	3.0264e-05	0.0121516	yes
XLOC_029691	XLOC_029691	Slc7a5	8:124404995-124431455	EPL	DCC	OK	16.2043	22.1198	0.448961	-4.38422	1.16403e-05	0.00521571	yes
XLOC_029302	XLOC_029302	Cpne7	8:125640602-125660055	EPL	DCC	OK	78.1823	111.304	0.509595	-4.96694	6.80193e-07	0.000447436	yes
XLOC_028987	XLOC_028987	Enpp6	8:48072287-48182109	EPL	DCC	OK	1.83062	0.740359	-1.30604	6.37009	1.88912e-10	2.78123e-07	yes
XLOC_029436	XLOC_029436	Rwdd4a	8:48619002-48638181	EPL	DCC	OK	1.39013	3.62499	1.38275	-4.66357	3.10769e-06	0.00177927	yes
XLOC_029161	XLOC_029161	Mt2	8:96696315-96697455	EPL	DCC	OK	74.4095	110.2	0.566566	-7.41756	1.19238e-13	4.09609e-10	yes
XLOC_029162	XLOC_029162	Mt1	8:96703052-96704229	EPL	DCC	OK	323.292	451.852	0.483012	-7.19183	6.39266e-13	1.79675e-09	yes
XLOC_029165	XLOC_029165	Cpne2	8:97057028-97094435	EPL	DCC	OK	9.32809	12.1242	0.378233	-3.96569	7.31843e-05	0.0238173	yes
XLOC_031489	XLOC_031489	Ephb1	9:101824400-102257572	EPL	DCC	OK	6.52527	5.11555	-0.351146	4.03715	5.41044e-05	0.0183818	yes
XLOC_031495	XLOC_031495	Bfsp2	9:103327252-103382734	EPL	DCC	OK	3.07563	1.39175	-1.14398	5.00221	5.66772e-07	0.000398247	yes
XLOC_030787	XLOC_030787	Mcam	9:43942677-43950812	EPL	DCC	OK	9.13441	5.38143	-0.763321	7.38158	1.56319e-13	4.83293e-10	yes
XLOC_031278	XLOC_031278	Phldb1	9:44494388-44546187	EPL	DCC	OK	31.4218	23.9394	-0.392379	4.55636	5.20484e-06	0.00268197	yes
XLOC_031297	XLOC_031297	Zbtb16	9:48459899-48644425	EPL	DCC	OK	10.0214	14.8728	0.56959	-6.19717	5.74874e-10	7.72755e-07	yes
XLOC_031398	XLOC_031398	Narg2	9:69245774-69280992	EPL	DCC	OK	0.0900323	0.473561	2.39504	-4.33563	1.45346e-05	0.00641953	yes
XLOC_033658	XLOC_033658	Apool	X:109415898-109486340	EPL	DCC	OK	15.9709	24.2896	0.604895	-4.27979	1.87069e-05	0.00785027	yes
XLOC_032963	XLOC_032963	Plp1	X:133354485-133373416	EPL	DCC	OK	390.048	255.297	-0.611475	7.69821	1.37668e-14	5.32034e-11	yes
XLOC_032993	XLOC_032993	Alas2	X:146956157-147022749	EPL	DCC	OK	0.95848	2.6107	1.44561	-4.57683	4.72075e-06	0.0025164	yes
XLOC_032745	XLOC_032745	Gm5384	X:19470945-19471114	EPL	DCC	OK	60.9202	157.885	1.37389	-4.14496	3.39874e-05	0.0129727	yes

## Sheet: PL vs AC
test_id	gene_id	gene	locus	sample_1	sample_2	status	value_1	value_2	log2(fold_change)	test_stat	p_value	q_value	significant
XLOC_001557	XLOC_001557	-	1:104524753-104524904	EPL	CCA	OK	732.981	9917.06	3.75807	-17.3	0	0	yes
XLOC_001620	XLOC_001620	-	1:124253716-124253823	EPL	CCA	OK	165.924	3762.32	4.50303	-9.2263	0	0	yes
XLOC_000016	XLOC_000016	Sulf1	1:12682400-12851259	EPL	CCA	OK	1.02412	5.98859	2.54783	-9.81919	0	0	yes
XLOC_001644	XLOC_001644	-	1:133470396-133470453	EPL	CCA	OK	1494.48	39107.6	4.70974	-5.11629	3.11597e-07	0.000140811	yes
XLOC_000796	XLOC_000796	Prelp	1:135806851-135817995	EPL	CCA	OK	6.11922	10.0919	0.721782	-4.17176	3.02255e-05	0.00910593	yes
XLOC_000320	XLOC_000320	Fmod	1:135933969-135944800	EPL	CCA	OK	1.60013	3.2994	1.04402	-4.26772	1.97482e-05	0.006065	yes
XLOC_000368	XLOC_000368	Rgs16	1:155587388-155592662	EPL	CCA	OK	2.46834	8.2718	1.74466	-7.44389	9.76996e-14	7.35841e-11	yes
XLOC_000397	XLOC_000397	F5	1:166081948-166150560	EPL	CCA	OK	0.303648	4.70923	3.95502	-14.2122	0	0	yes
XLOC_000083	XLOC_000083	1500015O10Rik	1:43787414-43799794	EPL	CCA	OK	1.92569	15.353	2.99507	-11.0922	0	0	yes
XLOC_000159	XLOC_000159	Igfbp2	1:72871044-72899041	EPL	CCA	OK	9.19827	27.13	1.56046	-8.21794	2.22045e-16	2.06586e-13	yes
XLOC_001468	XLOC_001468	-	1:87761120-87761185	EPL	CCA	OK	1414.93	19096.4	3.75449	-6.22	4.97142e-10	2.71139e-07	yes
XLOC_000701	XLOC_000701	Kcnj13	1:89223550-89347501	EPL	CCA	OK	0.174719	3.88739	4.47569	-11.3672	0	0	yes
XLOC_002057	XLOC_002057	D10Bwg1379e	10:18299938-18463830	EPL	CCA	OK	1.92393	0	-1.79769e+308	-1.79769e+308	2.0848e-19	2.06089e-16	yes
XLOC_002059	XLOC_002059	Perp	10:18564896-18576876	EPL	CCA	OK	1.12164	2.62151	1.22478	-3.90048	9.60025e-05	0.0255197	yes
XLOC_002067	XLOC_002067	Sgk1	10:21601862-21719710	EPL	CCA	OK	17.9606	44.2665	1.30138	-7.62909	2.35367e-14	1.81594e-11	yes
XLOC_002141	XLOC_002141	Ankrd57	10:58684611-58689177	EPL	CCA	OK	1.62195	2.95891	0.867332	-3.82192	0.000132418	0.0343343	yes
XLOC_002533	XLOC_002533	Ddit4	10:59412417-59414734	EPL	CCA	OK	22.596	35.4644	0.650308	-4.31482	1.59731e-05	0.00510381	yes
XLOC_002300	XLOC_002300	Pmch	10:87553815-87555214	EPL	CCA	OK	0.372934	2.79125	2.90392	-4.3865	1.15189e-05	0.00387635	yes
XLOC_004135	XLOC_004135	Arl4d	11:101526844-101529145	EPL	CCA	OK	5.29319	10.3954	0.97374	-4.34675	1.38167e-05	0.00455275	yes
XLOC_004170	XLOC_004170	Ace	11:105829288-105851266	EPL	CCA	OK	1.70609	10.0348	2.55624	-13.2809	0	0	yes
XLOC_005839	XLOC_005839	-	11:108872953-108873421	EPL	CCA	OK	47.083	671.738	3.83462	-18.9334	0	0	yes
XLOC_004411	XLOC_004411	Adra1b	11:43588132-43649883	EPL	CCA	OK	0.69459	1.87456	1.43232	-4.45956	8.21289e-06	0.00288665	yes
XLOC_003648	XLOC_003648	Ramp3	11:6558299-6577482	EPL	CCA	OK	1.68485	6.13204	1.86375	-5.8123	6.1622e-09	3.04576e-06	yes
XLOC_004628	XLOC_004628	Rpl23a	11:77990411-77997079	EPL	CCA	OK	9.03047	2.24377	-2.00888	5.5761	2.45967e-08	1.14422e-05	yes
XLOC_004699	XLOC_004699	Wfikkn2	11:94097301-94104025	EPL	CCA	OK	0.180708	0.650772	1.84849	-4.16292	3.142e-05	0.0093765	yes
XLOC_006264	XLOC_006264	Dio3	12:111517039-111519293	EPL	CCA	OK	0.688542	1.69856	1.3027	-3.93469	8.3305e-05	0.0229147	yes
XLOC_006299	XLOC_006299	4930427A07Rik	12:114394889-114403682	EPL	CCA	OK	1.90919	0.243879	-2.96873	7.36114	1.82299e-13	1.34108e-10	yes
XLOC_006069	XLOC_006069	Sostdc1	12:37040651-37045032	EPL	CCA	OK	0.946387	6.51275	2.78276	-9.11675	0	0	yes
XLOC_006084	XLOC_006084	Coch	12:52694347-52706789	EPL	CCA	OK	1.79769	4.4219	1.29852	-3.73768	0.000185727	0.0455433	yes
XLOC_006396	XLOC_006396	Nfkbia	12:56590395-56593615	EPL	CCA	OK	8.68097	21.2775	1.2934	-7.07749	1.46794e-12	9.87984e-10	yes
XLOC_006116	XLOC_006116	Abhd12b	12:71255075-71285422	EPL	CCA	OK	0.0917087	1.09639	3.57956	-4.08604	4.38799e-05	0.0126187	yes
XLOC_006441	XLOC_006441	-	12:75905158-75905265	EPL	CCA	OK	53503.5	11756.5	-2.18617	3.93856	8.19731e-05	0.0227461	yes
XLOC_007464	XLOC_007464	Gadd45g	13:51942029-51943872	EPL	CCA	OK	11.3071	19.0459	0.752247	-3.7298	0.000191632	0.04663	yes
XLOC_007492	XLOC_007492	Tgfbi	13:56710929-56740717	EPL	CCA	OK	1.12446	2.35945	1.06921	-3.74543	0.000180087	0.0445055	yes
XLOC_009167	XLOC_009167	Gm9307	14:103409438-103409867	EPL	CCA	OK	23.347	5.84037	-1.99911	4.47661	7.58362e-06	0.00269542	yes
XLOC_009178	XLOC_009178	Slitrk6	14:111147307-111154449	EPL	CCA	OK	0.113744	0.589273	2.37315	-4.76196	1.91721e-06	0.000748731	yes
XLOC_009236	XLOC_009236	-	14:20110655-20110728	EPL	CCA	OK	2723.51	34052.8	3.64424	-10.2494	0	0	yes
XLOC_009016	XLOC_009016	Otx2	14:49277354-49287141	EPL	CCA	OK	0.482875	4.33171	3.16522	-6.31867	2.63831e-10	1.54551e-07	yes
XLOC_008788	XLOC_008788	Cab39l	14:60059798-60167840	EPL	CCA	OK	6.31708	11.0268	0.803683	-3.80135	0.000143911	0.0365943	yes
XLOC_008859	XLOC_008859	-	14:76651174-76652137	EPL	CCA	OK	1.43258	10.7913	2.91318	-6.3005	2.96689e-10	1.7064e-07	yes
XLOC_010270	XLOC_010270	Enpp2	15:54670216-54785330	EPL	CCA	OK	51.5903	295.292	2.51697	-14.8849	0	0	yes
XLOC_010336	XLOC_010336	Slc39a4	15:76446259-76447453	EPL	CCA	OK	0.237754	1.03766	2.12579	-3.90069	9.59207e-05	0.0255197	yes
XLOC_010866	XLOC_010866	Apol7e	15:77532443-77532675	EPL	CCA	OK	14.8151	0	-1.79769e+308	-1.79769e+308	3.2041e-06	0.00122115	yes
XLOC_010867	XLOC_010867	Apol7e	15:77532728-77532933	EPL	CCA	OK	66.0979	8.50094	-2.95891	5.61856	1.92558e-08	9.0913e-06	yes
XLOC_011554	XLOC_011554	Zc3h7a	16:11136694-11176449	EPL	CCA	OK	18.0192	66.5769	1.88548	-6.81444	9.46354e-12	6.10939e-09	yes
XLOC_011969	XLOC_011969	-	16:17222396-17222608	EPL	CCA	OK	151.214	1994.87	3.72163	-16.287	0	0	yes
XLOC_011630	XLOC_011630	Cldn1	16:26356751-26371926	EPL	CCA	OK	0.714252	2.40914	1.75401	-5.89851	3.66789e-09	1.84169e-06	yes
XLOC_011723	XLOC_011723	Col8a1	16:57624392-57678659	EPL	CCA	OK	0.180721	2.14868	3.57162	-9.79423	0	0	yes
XLOC_011464	XLOC_011464	Vgll3	16:65828218-65866609	EPL	CCA	OK	0.192713	0.820851	2.09066	-6.23085	4.63922e-10	2.5746e-07	yes
XLOC_011499	XLOC_011499	Kcne2	16:92292609-92298528	EPL	CCA	OK	0.234083	6.08196	4.69944	-9.71809	0	0	yes
XLOC_011501	XLOC_011501	Clic6	16:92498344-92541580	EPL	CCA	OK	0.831357	9.53864	3.52024	-14.726	0	0	yes
XLOC_012925	XLOC_012925	Dusp1	17:26642533-26645639	EPL	CCA	OK	6.15604	10.2712	0.738523	-3.80016	0.000144605	0.0365943	yes
XLOC_012555	XLOC_012555	Cdkn1a	17:29230693-29237671	EPL	CCA	OK	4.49082	8.61277	0.939498	-4.41898	9.91684e-06	0.00344725	yes
XLOC_012563	XLOC_012563	Glp1r	17:31038889-31077715	EPL	CCA	OK	0.45738	1.02006	1.15719	-3.72217	0.00019752	0.0476958	yes
XLOC_012955	XLOC_012955	Sik1	17:31981268-31992685	EPL	CCA	OK	2.02307	4.13752	1.03223	-5.00259	5.65642e-07	0.000245109	yes
XLOC_013627	XLOC_013627	-	17:39979938-39981911	EPL	CCA	OK	1.33376	38.6622	4.85736	-18.1651	0	0	yes
XLOC_013038	XLOC_013038	AY036118	17:39981973-39985775	EPL	CCA	OK	78.21	212.687	1.44331	-8.80693	0	0	yes
XLOC_012792	XLOC_012792	Six3	17:86001750-86025499	EPL	CCA	OK	0.154097	1.10231	2.83862	-4.28465	1.83023e-05	0.00573225	yes
XLOC_014081	XLOC_014081	Ttr	18:20818884-20832827	EPL	CCA	OK	69.393	1446.51	4.38164	-24.3941	0	0	yes
XLOC_015078	XLOC_015078	-	18:85867614-85867683	EPL	CCA	OK	3684.74	50987.7	3.79051	-10.622	0	0	yes
XLOC_015341	XLOC_015341	Tcf7l2	19:55816309-56008146	EPL	CCA	OK	1.15664	8.80712	2.92873	-4.70144	2.58335e-06	0.000996573	yes
XLOC_016626	XLOC_016626	Plcb4	2:135485156-135840371	EPL	CCA	OK	4.18148	8.88342	1.0871	-4.95729	7.14827e-07	0.000301495	yes
XLOC_016734	XLOC_016734	Lbp	2:158132322-158158118	EPL	CCA	OK	1.6874	6.63268	1.97479	-7.31971	2.48468e-13	1.70865e-10	yes
XLOC_016765	XLOC_016765	Wfdc2	2:164387945-164393983	EPL	CCA	OK	0.196383	2.79698	3.83212	-4.29127	1.77653e-05	0.00561969	yes
XLOC_017483	XLOC_017483	Bmp7	2:172693519-172765977	EPL	CCA	OK	1.03433	2.26428	1.13036	-4.39588	1.10327e-05	0.00375267	yes
XLOC_016850	XLOC_016850	Col9a3	2:180332941-180356965	EPL	CCA	OK	3.82751	11.9366	1.64091	-8.10728	4.44089e-16	4.01368e-13	yes
XLOC_017531	XLOC_017531	Sox18	2:181404542-181406350	EPL	CCA	OK	2.6338	1.08796	-1.27552	4.10074	4.11833e-05	0.0119518	yes
XLOC_016916	XLOC_016916	-	2:22595346-22600510	EPL	CCA	OK	192.225	2114.65	3.45955	-12.2972	0	0	yes
XLOC_017648	XLOC_017648	Ptgds	2:25318620-25321886	EPL	CCA	OK	0.219287	0.934983	2.09212	-5.10573	3.29514e-07	0.00014681	yes
XLOC_016998	XLOC_016998	Lcn2	2:32240155-32243278	EPL	CCA	OK	2.08128	0.320213	-2.70037	4.47982	7.47071e-06	0.00268547	yes
XLOC_018972	XLOC_018972	Abca4	3:121746980-121882965	EPL	CCA	OK	0.442208	3.4508	2.96413	-6.28599	3.25765e-10	1.84017e-07	yes
XLOC_019403	XLOC_019403	Sgms2	3:131033242-131153082	EPL	CCA	OK	0.500659	1.12817	1.17208	-3.92636	8.62399e-05	0.0235175	yes
XLOC_019778	XLOC_019778	-	3:61962968-61963156	EPL	CCA	OK	24.9259	394.746	3.98521	-8.92677	0	0	yes
XLOC_018846	XLOC_018846	S100a8	3:90473003-90473954	EPL	CCA	OK	7.76437	2.04157	-1.92719	3.95583	7.62707e-05	0.0213511	yes
XLOC_019254	XLOC_019254	S100a9	3:90496559-90499221	EPL	CCA	OK	8.42169	2.62813	-1.68007	4.34125	1.41673e-05	0.00462015	yes
XLOC_018885	XLOC_018885	Txnip	3:96361859-96365785	EPL	CCA	OK	6.44916	15.57	1.27158	-6.78269	1.17961e-11	7.46293e-09	yes
XLOC_020738	XLOC_020738	Rims3	4:120527441-120569406	EPL	CCA	OK	8.23563	13.7918	0.743862	-4.81701	1.45727e-06	0.000583515	yes
XLOC_020773	XLOC_020773	Col8a2	4:125973864-125991692	EPL	CCA	OK	0.488222	2.46448	2.33567	-8.09478	6.66134e-16	5.69508e-13	yes
XLOC_020841	XLOC_020841	Id3	4:135699645-135701474	EPL	CCA	OK	18.6694	10.7839	-0.791797	3.74655	0.000179281	0.0445055	yes
XLOC_021421	XLOC_021421	Alpl	4:137297663-137352249	EPL	CCA	OK	1.57254	3.16806	1.0105	-3.81958	0.000133677	0.0343789	yes
XLOC_021428	XLOC_021428	Pla2g5	4:138355177-138375157	EPL	CCA	OK	0.202397	1.0642	2.39452	-4.40681	1.04902e-05	0.00360692	yes
XLOC_020918	XLOC_020918	Errfi1	4:150229180-150243052	EPL	CCA	OK	11.7448	18.4393	0.650763	-4.14978	3.32801e-05	0.00983879	yes
XLOC_020944	XLOC_020944	Hes5	4:154335009-154336494	EPL	CCA	OK	3.5697	1.0466	-1.77009	5.4708	4.48007e-08	2.05388e-05	yes
XLOC_020973	XLOC_020973	-	4:3016673-3018302	EPL	CCA	OK	82.4073	0	-1.79769e+308	-1.79769e+308	1.70537e-06	0.000674326	yes
XLOC_023315	XLOC_023315	Trpv4	5:115072163-115108406	EPL	CCA	OK	0.533434	4.09748	2.94136	-7.33054	2.2915e-13	1.64743e-10	yes
XLOC_022808	XLOC_022808	Cit	5:116357249-116459005	EPL	CCA	OK	6.29697	11.7504	0.899979	-4.36249	1.28591e-05	0.00428181	yes
XLOC_023003	XLOC_023003	AC113316.1	5:147043206-147114511	EPL	CCA	OK	18.6422	291.688	3.96778	-15.9992	0	0	yes
XLOC_023026	XLOC_023026	Kl	5:151755320-151796908	EPL	CCA	OK	3.42783	14.25	2.05559	-12.1937	0	0	yes
XLOC_023080	XLOC_023080	Wdr86	5:24216845-24236452	EPL	CCA	OK	0.239741	3.0181	3.65409	-4.14707	3.36762e-05	0.00986368	yes
XLOC_023040	XLOC_023040	Steap1	5:5736328-5749282	EPL	CCA	OK	0.266104	2.82289	3.40711	-5.78048	7.44857e-09	3.62493e-06	yes
XLOC_023181	XLOC_023181	Rbm47	5:66407880-66437455	EPL	CCA	OK	0.128333	0.899827	2.80976	-6.1527	7.61762e-10	4.01613e-07	yes
XLOC_026100	XLOC_026100	-	6:116629116-116635214	EPL	CCA	OK	0.0370232	2.37147	6.00121	-9.84302	0	0	yes
XLOC_025325	XLOC_025325	Tmem72	6:116641552-116666943	EPL	CCA	OK	0.0739867	3.29817	5.47826	-6.44454	1.15951e-10	7.05364e-08	yes
XLOC_024949	XLOC_024949	A2m	6:121586106-121629223	EPL	CCA	OK	0.69728	1.86199	1.41704	-5.09535	3.48094e-07	0.000152934	yes
XLOC_025000	XLOC_025000	Apold1	6:134933638-134936893	EPL	CCA	OK	0.946945	2.79641	1.56222	-5.94242	2.8084e-09	1.45636e-06	yes
XLOC_024637	XLOC_024637	Mdfic	6:15671340-15752163	EPL	CCA	OK	0.705174	2.03569	1.52946	-4.99249	5.96043e-07	0.000254792	yes
XLOC_025454	XLOC_025454	-	6:3150764-3151672	EPL	CCA	OK	71.0304	172.583	1.28078	-8.03794	8.88178e-16	7.20404e-13	yes
XLOC_025112	XLOC_025112	Slc13a4	6:35217813-35258151	EPL	CCA	OK	1.26164	4.94907	1.97186	-8.371	0	0	yes
XLOC_025734	XLOC_025734	-	6:49186444-49186617	EPL	CCA	OK	839.007	10088.2	3.58784	-17.5811	0	0	yes
XLOC_025054	XLOC_025054	Pon3	6:5167314-5206224	EPL	CCA	OK	0.489734	1.90107	1.95674	-6.97993	2.95342e-12	1.94636e-09	yes
XLOC_024753	XLOC_024753	Aqp1	6:55286159-55298535	EPL	CCA	OK	0.273585	4.67	4.09336	-10.8039	0	0	yes
XLOC_024810	XLOC_024810	Slc4a5	6:83187361-83254934	EPL	CCA	OK	0.122715	3.2331	4.71954	-7.32247	2.43361e-13	1.70865e-10	yes
XLOC_027370	XLOC_027370	Folr1	7:108988596-109017870	EPL	CCA	OK	1.3266	16.6408	3.64892	-8.08008	6.66134e-16	5.69508e-13	yes
XLOC_027378	XLOC_027378	Hbb-b1	7:110975050-110982005	EPL	CCA	OK	355.809	546.092	0.61804	-3.91064	9.20518e-05	0.0248878	yes
XLOC_026761	XLOC_026761	Syt9	7:114514498-114692169	EPL	CCA	OK	1.25341	2.97638	1.2477	-4.90595	9.29767e-07	0.000386991	yes
XLOC_027448	XLOC_027448	Cdr2	7:128100553-128125695	EPL	CCA	OK	2.77175	5.96398	1.10548	-4.87481	1.08915e-06	0.000447444	yes
XLOC_027558	XLOC_027558	Igf2	7:149836670-149846925	EPL	CCA	OK	10.7961	30.9656	1.52015	-8.28618	2.22045e-16	2.06586e-13	yes
XLOC_027068	XLOC_027068	Zfp36	7:29161807-29164279	EPL	CCA	OK	1.27329	3.20231	1.33055	-4.50499	6.6377e-06	0.00241345	yes
XLOC_027082	XLOC_027082	Spint2	7:30041283-30067035	EPL	CCA	OK	5.30161	11.0393	1.05814	-4.82543	1.39701e-06	0.000566558	yes
XLOC_027137	XLOC_027137	Plekhf1	7:39005604-39012997	EPL	CCA	OK	1.45836	3.22461	1.14477	-3.84795	0.000119113	0.0311396	yes
XLOC_026948	XLOC_026948	Tnnt1	7:4456181-4466249	EPL	CCA	OK	0.33739	3.94698	3.54826	-6.54153	6.08933e-11	3.77694e-08	yes
XLOC_026610	XLOC_026610	Slc17a6	7:58877006-58926498	EPL	CCA	OK	3.87258	8.41387	1.11947	-5.75727	8.54834e-09	4.09712e-06	yes
XLOC_026654	XLOC_026654	Abhd2	7:86418109-86510391	EPL	CCA	OK	12.6236	19.1224	0.599141	-4.32911	1.49712e-05	0.00483248	yes
XLOC_026687	XLOC_026687	Fzd4	7:96552850-96561625	EPL	CCA	OK	1.83616	3.1623	0.784285	-4.01111	6.0435e-05	0.0172229	yes
XLOC_029222	XLOC_029222	Cdh3	8:109079141-109079838	EPL	CCA	OK	0.0431498	0.843789	4.28946	-4.25039	2.13395e-05	0.00649069	yes
XLOC_029260	XLOC_029260	Vat1l	8:116729446-116897994	EPL	CCA	OK	5.00075	12.8768	1.36456	-8.05674	8.88178e-16	7.20404e-13	yes
XLOC_029739	XLOC_029739	-	8:3754430-3754584	EPL	CCA	OK	91.0617	314.178	1.78667	-4.5799	4.65196e-06	0.00171111	yes
XLOC_029005	XLOC_029005	BC030500	8:61379343-61393163	EPL	CCA	OK	0.909455	0	-1.79769e+308	-1.79769e+308	3.6664e-06	0.00138071	yes
XLOC_029165	XLOC_029165	Cpne2	8:97057028-97094435	EPL	CCA	OK	9.38662	14.8439	0.661188	-3.75413	0.000173943	0.0436694	yes
XLOC_029173	XLOC_029173	Ccdc135	8:97579011-97602287	EPL	CCA	OK	1.08159	6.16621	2.51124	-7.68949	1.4877e-14	1.17651e-11	yes
XLOC_031158	XLOC_031158	Lars2	9:123276062-123371876	EPL	CCA	OK	13.9442	115.222	3.04667	-14.5667	0	0	yes
XLOC_031178	XLOC_031178	Amotl1	9:14346410-14447921	EPL	CCA	OK	2.9822	6.14898	1.04397	-6.18659	6.148e-10	3.29627e-07	yes
XLOC_031598	XLOC_031598	-	9:3258818-3258934	EPL	CCA	OK	325.284	4571.39	3.81286	-11.1209	0	0	yes
XLOC_031250	XLOC_031250	Slc37a2	9:37035195-37063010	EPL	CCA	OK	0.494522	1.18308	1.25844	-4.27469	1.91403e-05	0.00593594	yes
XLOC_030894	XLOC_030894	Calml4	9:62705887-62723783	EPL	CCA	OK	1.58571	7.11342	2.16542	-3.96738	7.26671e-05	0.0205239	yes
XLOC_031398	XLOC_031398	Narg2	9:69245774-69280992	EPL	CCA	OK	0.0905972	0.490036	2.43535	-3.85765	0.000114481	0.0301782	yes
XLOC_031407	XLOC_031407	Cgnl1	9:71474312-71619366	EPL	CCA	OK	2.36694	5.01166	1.08226	-5.90334	3.56208e-09	1.81741e-06	yes
XLOC_031456	XLOC_031456	Zic1	9:91252845-91260745	EPL	CCA	OK	1.64258	5.27134	1.6822	-6.41272	1.4295e-10	8.53198e-08	yes
XLOC_032971	XLOC_032971	Cldn2	X:136335278-136345917	EPL	CCA	OK	0.155326	4.00421	4.68814	-10.3338	0	0	yes
XLOC_032991	XLOC_032991	Htr2c	X:143396975-143631821	EPL	CCA	OK	6.34186	12.4368	0.971633	-4.59642	4.29808e-06	0.00159954	yes
XLOC_033373	XLOC_033373	-	X:3846729-3846810	EPL	CCA	OK	1854.42	27024.4	3.86523	-11.7468	0	0	yes

## Sheet: 1G vs 3G
test_id	gene_id	gene	locus	sample_1	sample_2	status	value_1	value_2	log2(fold_change)	test_stat	p_value	q_value	significant
XLOC_000016	XLOC_000016	Sulf1	1:12682400-12851259	AG1	B3G	OK	1.98038	4.8876	1.30335	-6.26198	3.80114e-10	3.88789e-07	yes
XLOC_000810	XLOC_000810	Igfn1	1:137878484-137880871	AG1	B3G	OK	0.240679	0.960939	1.99734	-3.85939	0.00011367	0.0434054	yes
XLOC_000397	XLOC_000397	F5	1:166081948-166150560	AG1	B3G	OK	1.04268	3.97701	1.93139	-9.85618	0	0	yes
XLOC_000083	XLOC_000083	1500015O10Rik	1:43787414-43799794	AG1	B3G	OK	4.94445	16.642	1.75095	-11.1961	0	0	yes
XLOC_000159	XLOC_000159	Igfbp2	1:72871044-72899041	AG1	B3G	OK	15.4064	28.3716	0.880923	-7.78089	7.10543e-15	1.19701e-11	yes
XLOC_000701	XLOC_000701	Kcnj13	1:89223550-89347501	AG1	B3G	OK	0.76531	2.99971	1.97071	-6.59797	4.1682e-11	4.77492e-08	yes
XLOC_002046	XLOC_002046	Plagl1	10:12810656-12851500	AG1	B3G	OK	6.09756	4.17205	-0.547476	3.83151	0.000127358	0.0461695	yes
XLOC_002141	XLOC_002141	Ankrd57	10:58684611-58689177	AG1	B3G	OK	2.01334	3.03993	0.594451	-4.23887	2.2465e-05	0.0102123	yes
XLOC_002172	XLOC_002172	Egr2	10:67000541-67004936	AG1	B3G	OK	1.24476	2.88487	1.21264	-6.58896	4.42921e-11	4.87878e-08	yes
XLOC_002324	XLOC_002324	Dcn	10:96942089-96980796	AG1	B3G	OK	25.5625	17.1765	-0.573591	4.00998	6.07239e-05	0.0248439	yes
XLOC_004170	XLOC_004170	Ace	11:105829288-105851266	AG1	B3G	OK	3.80389	10.1732	1.41923	-12.7795	0	0	yes
XLOC_004098	XLOC_004098	Ppp1r1b	11:98209550-98219164	AG1	B3G	OK	15.03	19.9412	0.407903	-4.05265	5.06406e-05	0.0213279	yes
XLOC_006069	XLOC_006069	Sostdc1	12:37040651-37045032	AG1	B3G	OK	2.48628	6.60583	1.40975	-8.11836	4.44089e-16	8.47885e-13	yes
XLOC_007374	XLOC_007374	Gm11274	13:21845334-21878961	AG1	B3G	OK	76.8705	39.1086	-0.974941	3.98635	6.70975e-05	0.027046	yes
XLOC_007492	XLOC_007492	Tgfbi	13:56710929-56740717	AG1	B3G	OK	1.19867	2.1851	0.866265	-4.35797	1.31277e-05	0.00653145	yes
XLOC_007769	XLOC_007769	Smad5	13:56804409-56843757	AG1	B3G	OK	0.778951	0	-1.79769e+308	-1.79769e+308	1.32276e-05	0.00653145	yes
XLOC_009016	XLOC_009016	Otx2	14:49277354-49287141	AG1	B3G	OK	1.4184	4.00501	1.49754	-4.87855	1.06866e-06	0.000711754	yes
XLOC_008788	XLOC_008788	Cab39l	14:60059798-60167840	AG1	B3G	OK	7.41028	10.238	0.466337	-3.82669	0.00012988	0.0464953	yes
XLOC_008859	XLOC_008859	-	14:76651174-76652137	AG1	B3G	OK	5.6406	14.0795	1.31968	-5.76942	7.95463e-09	6.70037e-06	yes
XLOC_010168	XLOC_010168	Nr4a1	15:101084758-101105227	AG1	B3G	OK	30.8111	42.833	0.475274	-4.20324	2.63117e-05	0.0117741	yes
XLOC_010170	XLOC_010170	Krt18	15:101861304-101862451	AG1	B3G	OK	0.507147	3.74418	2.88417	-3.98319	6.7995e-05	0.027046	yes
XLOC_010270	XLOC_010270	Enpp2	15:54670216-54785330	AG1	B3G	OK	93.0054	261.333	1.4905	-14.8232	0	0	yes
XLOC_010310	XLOC_010310	Arc	15:74499510-74503081	AG1	B3G	OK	50.0596	77.7257	0.634743	-6.24623	4.20489e-10	4.15254e-07	yes
XLOC_011578	XLOC_011578	Sdf2l1	16:17130229-17132410	AG1	B3G	OK	10.4379	17.3265	0.731153	-5.26108	1.43215e-07	0.000107935	yes
XLOC_011630	XLOC_011630	Cldn1	16:26356751-26371926	AG1	B3G	OK	0.692117	1.81355	1.38973	-6.32742	2.49301e-10	2.64434e-07	yes
XLOC_011723	XLOC_011723	Col8a1	16:57624392-57678659	AG1	B3G	OK	0.55281	1.62591	1.5564	-7.74179	9.76996e-15	1.55446e-11	yes
XLOC_011464	XLOC_011464	Vgll3	16:65828218-65866609	AG1	B3G	OK	1.0156	0.442421	-1.19884	6.01997	1.74448e-09	1.61161e-06	yes
XLOC_011499	XLOC_011499	Kcne2	16:92292609-92298528	AG1	B3G	OK	1.71486	7.24822	2.07954	-10.7418	0	0	yes
XLOC_011501	XLOC_011501	Clic6	16:92498344-92541580	AG1	B3G	OK	2.62947	8.43427	1.68149	-11.4022	0	0	yes
XLOC_012555	XLOC_012555	Cdkn1a	17:29230693-29237671	AG1	B3G	OK	3.86093	6.42005	0.733637	-4.83267	1.34714e-06	0.00085735	yes
XLOC_012955	XLOC_012955	Sik1	17:31981268-31992685	AG1	B3G	OK	2.66084	3.91696	0.557851	-4.27068	1.94876e-05	0.00934854	yes
XLOC_012996	XLOC_012996	Hspa1b	17:35093377-35096424	AG1	B3G	OK	11.7042	21.0954	0.849894	-8.78077	0	0	yes
XLOC_013054	XLOC_013054	Capn11	17:45767177-45781066	AG1	B3G	OK	0.993872	0.315688	-1.65456	4.95336	7.29419e-07	0.000497377	yes
XLOC_012817	XLOC_012817	Ezr	17:6942536-6987139	AG1	B3G	OK	17.2938	22.632	0.388112	-4.24359	2.19976e-05	0.0101611	yes
XLOC_014081	XLOC_014081	Ttr	18:20818884-20832827	AG1	B3G	OK	375.259	1705.95	2.18462	-21.7905	0	0	yes
XLOC_014118	XLOC_014118	Egr1	18:35020761-35030147	AG1	B3G	OK	46.0589	68.2011	0.566316	-6.93564	4.04388e-12	5.03533e-09	yes
XLOC_016734	XLOC_016734	Lbp	2:158132322-158158118	AG1	B3G	OK	2.45238	6.38023	1.37942	-8.10411	4.44089e-16	8.47885e-13	yes
XLOC_016765	XLOC_016765	Wfdc2	2:164387945-164393983	AG1	B3G	OK	0.705698	2.88722	2.03256	-4.19008	2.78857e-05	0.0122864	yes
XLOC_016850	XLOC_016850	Col9a3	2:180332941-180356965	AG1	B3G	OK	5.79187	13.619	1.23352	-7.97598	1.55431e-15	2.78212e-12	yes
XLOC_016998	XLOC_016998	Lcn2	2:32240155-32243278	AG1	B3G	OK	0.958316	3.16661	1.72437	-4.63063	3.64549e-06	0.00200775	yes
XLOC_016309	XLOC_016309	Hspa5	2:34627514-34655580	AG1	B3G	OK	45.6609	61.0838	0.419833	-5.08825	3.61374e-07	0.000258735	yes
XLOC_018972	XLOC_018972	Abca4	3:121746980-121882965	AG1	B3G	OK	1.11209	3.18833	1.51953	-4.95548	7.21508e-07	0.000497377	yes
XLOC_020773	XLOC_020773	Col8a2	4:125973864-125991692	AG1	B3G	OK	0.98835	2.34526	1.24666	-7.11628	1.10867e-12	1.57192e-09	yes
XLOC_021428	XLOC_021428	Pla2g5	4:138355177-138375157	AG1	B3G	OK	0.345256	1.16288	1.75196	-4.56275	5.0489e-06	0.00272821	yes
XLOC_021863	XLOC_021863	-	4:74269775-74269835	AG1	B3G	OK	12034.8	802.263	-3.907	4.2647	2.00168e-05	0.00939772	yes
XLOC_023315	XLOC_023315	Trpv4	5:115072163-115108406	AG1	B3G	OK	1.41915	4.81231	1.7617	-6.00759	1.88298e-09	1.68521e-06	yes
XLOC_023026	XLOC_023026	Kl	5:151755320-151796908	AG1	B3G	OK	5.74077	13.477	1.23118	-12.4599	0	0	yes
XLOC_023141	XLOC_023141	Msx1	5:38211731-38215886	AG1	B3G	OK	2.18749	4.1979	0.940395	-4.51131	6.44294e-06	0.00341703	yes
XLOC_023040	XLOC_023040	Steap1	5:5736328-5749282	AG1	B3G	OK	0.791275	2.81414	1.83045	-5.41802	6.02627e-08	4.88292e-05	yes
XLOC_023181	XLOC_023181	Rbm47	5:66407880-66437455	AG1	B3G	OK	0.263296	0.826322	1.65002	-5.8514	4.87463e-09	4.23044e-06	yes
XLOC_026100	XLOC_026100	-	6:116629116-116635214	AG1	B3G	OK	0.527259	2.17508	2.04448	-10.7205	0	0	yes
XLOC_025325	XLOC_025325	Tmem72	6:116641552-116666943	AG1	B3G	OK	0.337577	1.25665	1.8963	-7.59888	2.9976e-14	4.51833e-11	yes
XLOC_024949	XLOC_024949	A2m	6:121586106-121629223	AG1	B3G	OK	0.895733	1.45701	0.701867	-3.83346	0.000126355	0.0461695	yes
XLOC_025019	XLOC_025019	Slco1c1	6:141472833-141519485	AG1	B3G	OK	13.453	17.21	0.355327	-3.91936	8.87847e-05	0.0348316	yes
XLOC_025508	XLOC_025508	-	6:16983556-16983641	AG1	B3G	OK	2448.51	56.9495	-5.42608	4.81522	1.47036e-06	0.000915425	yes
XLOC_025112	XLOC_025112	Slc13a4	6:35217813-35258151	AG1	B3G	OK	2.56708	4.36116	0.764586	-5.41473	6.13796e-08	4.88292e-05	yes
XLOC_025142	XLOC_025142	Pdia4	6:47746142-47763503	AG1	B3G	OK	19.3452	26.6522	0.462279	-4.76332	1.90436e-06	0.00109078	yes
XLOC_025054	XLOC_025054	Pon3	6:5167314-5206224	AG1	B3G	OK	0.808372	1.54884	0.938093	-5.2921	1.20922e-07	9.35966e-05	yes
XLOC_024753	XLOC_024753	Aqp1	6:55286159-55298535	AG1	B3G	OK	0.940768	4.66447	2.3098	-11.6744	0	0	yes
XLOC_024810	XLOC_024810	Slc4a5	6:83187361-83254934	AG1	B3G	OK	0.648546	3.19991	2.30275	-11.2199	0	0	yes
XLOC_025230	XLOC_025230	Egr4	6:85458646-85463681	AG1	B3G	OK	2.52316	3.66558	0.538811	-4.1414	3.45194e-05	0.0149788	yes
XLOC_025267	XLOC_025267	-	6:91270786-91270956	AG1	B3G	OK	52724.5	523.013	-6.65548	3.8413	0.000122382	0.0460894	yes
XLOC_027370	XLOC_027370	Folr1	7:108988596-109017870	AG1	B3G	OK	4.43815	17.713	1.99678	-7.11094	1.15263e-12	1.57192e-09	yes
XLOC_027448	XLOC_027448	Cdr2	7:128100553-128125695	AG1	B3G	OK	3.29036	5.0045	0.604981	-4.03988	5.34784e-05	0.0221966	yes
XLOC_027558	XLOC_027558	Igf2	7:149836670-149846925	AG1	B3G	OK	18.8846	30.8071	0.706057	-6.97523	3.05356e-12	3.97504e-09	yes
XLOC_027008	XLOC_027008	Fosb	7:19888045-19895431	AG1	B3G	OK	2.11141	3.72439	0.818794	-3.82171	0.000132531	0.0468585	yes
XLOC_027082	XLOC_027082	Spint2	7:30041283-30067035	AG1	B3G	OK	7.70253	11.8905	0.626409	-4.44407	8.82717e-06	0.00459639	yes
XLOC_026654	XLOC_026654	Abhd2	7:86418109-86510391	AG1	B3G	OK	13.8097	17.2324	0.319449	-3.81867	0.000134176	0.0468616	yes
XLOC_026687	XLOC_026687	Fzd4	7:96552850-96561625	AG1	B3G	OK	1.87333	2.72879	0.542651	-4.26956	1.95856e-05	0.00934854	yes
XLOC_029222	XLOC_029222	Cdh3	8:109079141-109079838	AG1	B3G	OK	0.131353	0.90318	2.78157	-4.80747	1.52851e-06	0.000931384	yes
XLOC_029260	XLOC_029260	Vat1l	8:116729446-116897994	AG1	B3G	OK	6.811	10.6807	0.649073	-6.19898	5.6832e-10	5.42537e-07	yes
XLOC_028929	XLOC_028929	Sfrp1	8:24522292-24560100	AG1	B3G	OK	0.993375	1.63724	0.720853	-3.90464	9.43659e-05	0.0365209	yes
XLOC_029104	XLOC_029104	Dnajb1	8:86132079-86135915	AG1	B3G	OK	19.7866	26.9552	0.446044	-4.7754	1.79353e-06	0.00104827	yes
XLOC_029554	XLOC_029554	Junb	8:87500806-87502706	AG1	B3G	OK	19.7498	27.3827	0.471423	-4.79307	1.64251e-06	0.000979999	yes
XLOC_029165	XLOC_029165	Cpne2	8:97057028-97094435	AG1	B3G	OK	18.1779	13.8734	-0.38987	3.83824	0.000123918	0.0460894	yes
XLOC_029173	XLOC_029173	Ccdc135	8:97579011-97602287	AG1	B3G	OK	2.47082	5.33062	1.10931	-5.211	1.87822e-07	0.000137924	yes
XLOC_031250	XLOC_031250	Slc37a2	9:37035195-37063010	AG1	B3G	OK	0.623637	1.17818	0.917782	-4.68128	2.85086e-06	0.0016009	yes
XLOC_030785	XLOC_030785	C1qtnf5,Mfrp	9:43909713-43917327	AG1	B3G	OK	5.72052	11.0426	0.948863	-4.84702	1.2533e-06	0.000815757	yes
XLOC_031407	XLOC_031407	Cgnl1	9:71474312-71619366	AG1	B3G	OK	2.8705	4.83473	0.752135	-6.69722	2.12426e-11	2.53486e-08	yes
XLOC_031006	XLOC_031006	Rbp1	9:98325199-98347038	AG1	B3G	OK	12.0899	18.1234	0.584057	-4.05969	4.91372e-05	0.0210036	yes
XLOC_032971	XLOC_032971	Cldn2	X:136335278-136345917	AG1	B3G	OK	0.83128	3.64146	2.13111	-10.5043	0	0	yes
XLOC_033144	XLOC_033144	Gpr101	X:54749857-54756992	AG1	B3G	OK	2.56715	1.69588	-0.598134	4.37824	1.19639e-05	0.00611846	yes
